# Supplementary material for: Reef Sediments Can Act As a Stony Coral Tissue Loss Disease Vector
Source: Frontiers journal article supplement (doi:10.3389/fmars.2021.815698), 2022-01-13
Supplement: Data_Sheet_1.xlsx [file Data_Sheet_1.xlsx]

## Sheet: Sheet1
Sample ID	Species	Colony	Replicate	Treatment	Transmission Symptoms	Transmission Start	Time to Lesion	Transmission Time	Transmission Time Days
Sediment_001	Ofav	Red	1	HS		2020-11-13 12:30:00
Sediment_002	Ofav	Red	2	HS		2020-11-13 12:30:00
Sediment_003	Ofav	Red	3	HS		2020-11-13 12:30:00
Sediment_004	Ofav	Orange	1	HS		2020-11-13 12:30:00
Sediment_005	Ofav	Orange	2	HS		2020-11-13 12:30:00
Sediment_006	Ofav	Orange	3	HS		2020-11-13 12:30:00
Sediment_007	Ofav	Yellow	1	HS		2020-11-13 12:30:00
Sediment_008	Ofav	Yellow	2	HS		2020-11-13 12:30:00
Sediment_009	Ofav	Yellow	3	HS		2020-11-13 12:30:00
Sediment_010	Mcav	Red	1	HS		2020-11-13 12:30:00
Sediment_011	Mcav	Red	2	HS		2020-11-13 12:30:00
Sediment_012	Mcav	Red	3	HS		2020-11-13 12:30:00
Sediment_013	Mcav	Orange	1	HS		2020-11-13 12:30:00
Sediment_014	Mcav	Orange	2	HS		2020-11-13 12:30:00
Sediment_015	Mcav	Orange	3	HS		2020-11-13 12:30:00
Sediment_016	Ofav	Red	1	DC	MF, TL	2020-11-13 13:00:00	2020-11-15 13:00:00	2 days 0 hrs 0 mins	2
Sediment_017	Ofav	Red	2	DC	MF, TL	2020-11-13 13:00:00	2020-11-22 13:20:00	9 days 0 hrs 20 mins	9.01389
Sediment_018	Ofav	Red	3	DC	MF, TL	2020-11-13 13:00:00	2020-11-14 13:10:00	1 days 0 hrs 10 mins	1.00694
Sediment_019	Ofav	Orange	1	DC	Swelling, TL	2020-11-13 13:00:00	2020-11-17 13:20:00	4 days 0 hrs 20 mins	4.01389
Sediment_020	Ofav	Orange	2	DC	TL	2020-11-13 13:00:00	2020-11-20 13:15:00	7 days 0 hrs 15 mins	7.01042
Sediment_021	Ofav	Orange	3	DC	Swelling, TL	2020-11-13 13:00:00	2020-11-24 13:05:00	11 days 0 hrs 5 mins	11.0035
Sediment_022	Ofav	Yellow	1	DC		2020-11-13 13:00:00
Sediment_023	Ofav	Yellow	2	DC	TL	2020-11-13 13:00:00	2020-11-24 13:05:00	11 days 0 hrs 5 mins	11.0035
Sediment_024	Ofav	Yellow	3	DC	TL	2020-11-13 13:00:00	2020-11-21 13:05:00	8 days 0 hrs 5 mins	8.00347
Sediment_025	Mcav	Red	1	DC	MF, TL	2020-11-13 13:00:00	2020-11-25 13:25:00	12 days 0 hrs 25 mins	12.0174
Sediment_026	Mcav	Red	2	DC	MF, TL	2020-11-13 13:00:00	2020-11-21 13:05:00	8 days 0 hrs 5 mins	8.00347
Sediment_027	Mcav	Red	3	DC	MF, TL	2020-11-13 13:00:00	2020-11-28 11:55:00	14 days 22 hrs 55 mins	14.9549
Sediment_028	Mcav	Orange	1	DC	Mucus, Necrosis, TL	2020-11-13 13:00:00	2020-11-30 13:05:00	17 days 0 hrs 5 mins	17.0035
Sediment_029	Mcav	Orange	2	DC	MF, TL	2020-11-13 13:00:00	2020-11-29 12:45:00	15 days 23 hrs 45 mins	15.9896
Sediment_030	Mcav	Orange	3	DC	TL	2020-11-13 13:00:00	2020-11-27 13:05:00	14 days 0 hrs 5 mins	14.0035
Sediment_031	Ofav	Red	1	DS		2020-11-13 15:00:00
Sediment_032	Ofav	Red	2	DS		2020-11-13 15:00:00
Sediment_033	Ofav	Red	3	DS	Swelling, TL	2020-11-13 15:00:00	2020-11-29 12:45:00	15 days 21 hrs 45 mins	15.9062
Sediment_034	Ofav	Orange	1	DS	Paling, TL	2020-11-13 15:00:00	2020-11-20 13:15:00	6 days 22 hrs 15 mins	6.92708
Sediment_035	Ofav	Orange	2	DS		2020-11-13 15:00:00
Sediment_036	Ofav	Orange	3	DS		2020-11-13 15:00:00
Sediment_037	Ofav	Yellow	1	DS		2020-11-13 15:00:00
Sediment_038	Ofav	Yellow	2	DS	Paling, TL	2020-11-13 15:00:00	2020-11-21 13:05:00	7 days 22 hrs 5 mins	7.92014
Sediment_039	Ofav	Yellow	3	DS		2020-11-13 15:00:00
Sediment_040	Mcav	Red	1	DS	TL	2020-11-13 15:00:00	2020-11-20 13:15:00	6 days 22 hrs 15 mins	6.92708
Sediment_041	Mcav	Red	2	DS	Paling, TL	2020-11-13 15:00:00	2020-11-28 11:55:00	14 days 20 hrs 55 mins	14.8715
Sediment_042	Mcav	Red	3	DS		2020-11-13 15:00:00
Sediment_043	Mcav	Orange	1	DS	MF, TL	2020-11-13 15:00:00	2020-11-25 13:25:00	11 days 22 hrs 25 mins	11.934
Sediment_044	Mcav	Orange	2	DS	Necrosis, TL	2020-11-13 15:00:00	2020-11-28 11:55:00	14 days 20 hrs 55 mins	14.8715
Sediment_045	Mcav	Orange	3	DS		2020-11-13 15:00:00
Sediment_046	Ofav	Red	1	AS		2020-11-30 15:10:00
Sediment_047	Ofav	Red	2	AS		2020-11-30 15:15:00
Sediment_048	Ofav	Red	3	AS		2020-11-17 15:20:00
Sediment_049	Ofav	Orange	1	AS	TL	2020-11-20 15:05:00	2020-11-21 13:05:00	0 days 22 hrs 0 mins	0.916667
Sediment_050	Ofav	Orange	2	AS	Paling, TL	2020-12-02 14:40:00	2020-12-03 13:05:00	0 days 22 hrs 25 mins	0.934028
Sediment_051	Ofav	Orange	3	AS	Paling, TL	2020-11-26 14:40:00	2020-11-27 13:05:00	0 days 22 hrs 25 mins	0.934028
Sediment_052	Ofav	Yellow	1	AS		2020-12-07 15:10:00
Sediment_053	Ofav	Yellow	2	AS		2020-12-02 14:45:00
Sediment_054	Ofav	Yellow	3	AS		2020-12-05 14:40:00
Sediment_055	Mcav	Red	1	AS	Paling, TL	2020-12-05 14:50:00	2020-12-06 12:40:00	0 days 21 hrs 50 mins	0.909722
Sediment_056	Mcav	Red	2	AS	Paling, TL	2020-12-07 15:15:00	2020-12-08 13:00:00	0 days 21 hrs 45 mins	0.90625
Sediment_057	Mcav	Red	3	AS	TL	2020-12-07 15:15:00	2020-12-08 13:00:00	0 days 21 hrs 45 mins	0.90625
Sediment_058	Mcav	Orange	1	AS		2020-12-05 14:55:00
Sediment_059	Mcav	Orange	2	AS	Paling, TL	2020-12-07 15:25:00	2020-12-08 13:00:00	0 days 21 hrs 35 mins	0.899306
Sediment_060	Mcav	Orange	3	AS	Paling, TL	2020-12-07 15:30:00	2020-12-08 13:00:00	0 days 21 hrs 30 mins	0.895833
Code	Definition
MF	Mesenterial filaments
Mucus	Mucus production
Necrosis	Liquefactive necrosis
Paling	Tissue paling/bleaching
Swelling	Tissue swelling
TL	Tissue loss
