# Supplementary material for: Reef Sediments Can Act As a Stony Coral Tissue Loss Disease Vector
Source: Frontiers journal article supplement (doi:10.3389/fmars.2021.815698), 2022-01-13
Supplement: Data_Sheet_2.xlsx [file Data_Sheet_2.xlsx]

## Sheet: Sheet1
Species	Genotype	Replicate	Genotype Replicate	Treatment	Photo Number	Random Number	Measurement	Result
Mcav	Orange	2	Orange2	DC	1	2	Gastrosep	7.25
Mcav	Orange	2	Orange2	DC	1	2	Exopercent	0.2
Mcav	Orange	2	Orange2	DC	2	6	Exopercent	0.0454545
Mcav	Orange	2	Orange2	DC	2		Gastrosep	31.667
Mcav	Orange	2	Orange2	DC	3	4	Exopercent	0
Mcav	Orange	2	Orange2	DC	3		Gastrosep	0
Mcav	Orange	2	Orange2	DC	5	11	Exopercent	0
Mcav	Orange	2	Orange2	DC	5		Gastrosep	9.89
Mcav	Orange	2	Orange2	DC	6	6	Exopercent	0
Mcav	Orange	2	Orange2	DC	6		Gastrosep	10.607
Mcav	Orange	2	Orange2	DC	7	3	Exopercent	0
Mcav	Orange	2	Orange2	DC	7		Gastrosep	0
Mcav	Orange	2	Orange2	DC	8	5	Exopercent	0.375
Mcav	Orange	2	Orange2	DC	8		Gastrosep	14.18
Mcav	Orange	2	Orange2	DC	9	9	Exopercent	0
Mcav	Orange	2	Orange2	DC	9		Gastrosep	NA
Mcav	Orange	2	Orange2	DC	10	6	Exopercent	0.2
Mcav	Orange	2	Orange2	DC	10		Gastrosep	19.962
Mcav	Orange	2	Orange2	DC			Zooxarea	0.334845
Mcav	Orange	2	Orange2	DC			Zooxarea	0.453008
Mcav	Orange	2	Orange2	DC			Zooxarea	0.487991
Mcav	Orange	2	Orange2	DC			Zooxarea	0.330599
Mcav	Orange	2	Orange2	DC			Zooxarea	0.486638
Mcav	Orange	2	Orange2	DC			Zooxarea	0.715799
Mcav	Orange	2	Orange2	DC			Zooxarea	0.499572
Mcav	Orange	2	Orange2	DC			Zooxarea	0.492529
Mcav	Orange	2	Orange2	DC			Zooxarea	0.492512
Mcav	Orange	2	Orange2	DC			Zooxarea	0.262866
Mcav	Orange	2	Orange2	DC			Zooxarea	0.412032
Mcav	Orange	2	Orange2	DC			Zooxarea	0.369078
Mcav	Orange	2	Orange2	DC			Zooxarea	0.735873
Mcav	Orange	2	Orange2	DC			Zooxarea	0.611264
Mcav	Orange	2	Orange2	DC			Zooxarea	0.427373
Mcav	Orange	2	Orange2	DC			Zooxarea	0.512202
Mcav	Orange	2	Orange2	DC			Zooxarea	0.616403
Mcav	Orange	2	Orange2	DC			Zooxarea	0.449296
Mcav	Orange	2	Orange2	DC			Zooxarea	0.427461
Mcav	Orange	2	Orange2	DC			Zooxarea	0.595235
Mcav	Orange	2	Orange2	DC			Zooxarea	0.431585
Mcav	Orange	2	Orange2	DC			Zooxarea	0.50777
Mcav	Orange	2	Orange2	DC			Zooxarea	0.410172
Mcav	Orange	2	Orange2	DC			Zooxarea	0.61338
Mcav	Orange	2	Orange2	DC			Zooxarea	0.641832
Mcav	Red	1	Red1	DC	1	2	Exopercent	0
Mcav	Red	1	Red1	DC	1		Gastrosep	7.353
Mcav	Red	1	Red1	DC	2	12	Exopercent	0
Mcav	Red	1	Red1	DC	2		Gastrosep	0
Mcav	Red	1	Red1	DC	3	9	Exopercent	0
Mcav	Red	1	Red1	DC	3		Gastrosep	0
Mcav	Red	1	Red1	DC	4	1	Exopercent	0
Mcav	Red	1	Red1	DC	4		Gastrosep	0
Mcav	Red	1	Red1	DC	5	9	Exopercent	0.125
Mcav	Red	1	Red1	DC	5		Gastrosep	9.22
Mcav	Red	1	Red1	DC	6	5	Exopercent	0
Mcav	Red	1	Red1	DC	6		Gastrosep	0
Mcav	Red	1	Red1	DC	7	3	Exopercent	0.1
Mcav	Red	1	Red1	DC	7		Gastrosep	21.073
Mcav	Red	1	Red1	DC	8	11	Exopercent	0
Mcav	Red	1	Red1	DC	8		Gastrosep	12.26
Mcav	Red	1	Red1	DC	9	11	Exopercent	0.333333
Mcav	Red	1	Red1	DC	9		Gastrosep	16.817
Mcav	Red	1	Red1	DC	10	9	Exopercent	0
Mcav	Red	1	Red1	DC	10		Gastrosep	0
Mcav	Red	1	Red1	DC			Zooxarea	0.51693
Mcav	Red	1	Red1	DC			Zooxarea	0.573839
Mcav	Red	1	Red1	DC			Zooxarea	0.413854
Mcav	Red	1	Red1	DC			Zooxarea	0.503662
Mcav	Red	1	Red1	DC			Zooxarea	0.448091
Mcav	Red	1	Red1	DC			Zooxarea	0.526239
Mcav	Red	1	Red1	DC			Zooxarea	0.604394
Mcav	Red	1	Red1	DC			Zooxarea	0.514972
Mcav	Red	1	Red1	DC			Zooxarea	0.55657
Mcav	Red	1	Red1	DC			Zooxarea	0.566542
Mcav	Red	1	Red1	DC			Zooxarea	0.577548
Mcav	Red	1	Red1	DC			Zooxarea	0.590384
Mcav	Red	1	Red1	DC			Zooxarea	0.4809
Mcav	Red	1	Red1	DC			Zooxarea	0.502694
Mcav	Red	1	Red1	DC			Zooxarea	0.660045
Mcav	Red	1	Red1	DC			Zooxarea	0.448902
Mcav	Red	1	Red1	DC			Zooxarea	0.567104
Mcav	Red	1	Red1	DC			Zooxarea	0.540507
Mcav	Red	1	Red1	DC			Zooxarea	0.55501
Mcav	Red	1	Red1	DC			Zooxarea	0.496486
Mcav	Red	1	Red1	DC			Zooxarea	0.657528
Mcav	Red	1	Red1	DC			Zooxarea	0.725186
Mcav	Red	1	Red1	DC			Zooxarea	0.52325
Mcav	Red	1	Red1	DC			Zooxarea	0.5792
Mcav	Red	1	Red1	DC			Zooxarea	0.586319
Mcav	Red	3	Red3	DC	1	1	Exopercent	0
Mcav	Red	3	Red3	DC	1		Gastrosep	NA
Mcav	Red	3	Red3	DC	2	5	Exopercent	0
Mcav	Red	3	Red3	DC	2		Gastrosep	26.28
Mcav	Red	3	Red3	DC	3	10	Exopercent	0
Mcav	Red	3	Red3	DC	3		Gastrosep	32.784
Mcav	Red	3	Red3	DC	4	4	Exopercent	0
Mcav	Red	3	Red3	DC	4		Gastrosep	12.811
Mcav	Red	3	Red3	DC			Zooxarea	0.370467
Mcav	Red	3	Red3	DC			Zooxarea	0.4516
Mcav	Red	3	Red3	DC			Zooxarea	0.30613
Mcav	Red	3	Red3	DC			Zooxarea	0.445408
Mcav	Red	3	Red3	DC			Zooxarea	0.549888
Mcav	Red	3	Red3	DC			Zooxarea	0.476803
Mcav	Red	3	Red3	DC			Zooxarea	0.311368
Mcav	Red	3	Red3	DC			Zooxarea	0.606825
Mcav	Red	3	Red3	DC			Zooxarea	0.476265
Mcav	Red	3	Red3	DC			Zooxarea	0.542956
Mcav	Red	3	Red3	DC			Zooxarea	0.555735
Mcav	Red	3	Red3	DC			Zooxarea	0.856217
Mcav	Red	3	Red3	DC			Zooxarea	0.758287
Mcav	Red	3	Red3	DC			Zooxarea	0.459265
Mcav	Red	3	Red3	DC			Zooxarea	0.41772
Mcav	Red	3	Red3	DC			Zooxarea	0.383013
Mcav	Red	3	Red3	DC			Zooxarea	0.758318
Mcav	Red	3	Red3	DC			Zooxarea	0.706229
Mcav	Red	3	Red3	DC			Zooxarea	0.482686
Mcav	Red	3	Red3	DC			Zooxarea	0.55053
Mcav	Red	3	Red3	DC			Zooxarea	0.625175
Mcav	Red	3	Red3	DC			Zooxarea	0.725619
Mcav	Red	3	Red3	DC			Zooxarea	0.708833
Mcav	Red	3	Red3	DC			Zooxarea	0.470826
Mcav	Red	3	Red3	DC			Zooxarea	0.515599
Mcav	Red	3	Red3	DC	5	1	Exopercent	0.125
Mcav	Red	3	Red3	DC	5		Gastrosep	9.086
Mcav	Red	3	Red3	DC	6	11	Exopercent	0.117647
Mcav	Red	3	Red3	DC	6		Gastrosep	0
Mcav	Red	3	Red3	DC	7	10	Exopercent	0.0714286
Mcav	Red	3	Red3	DC	7		Gastrosep	0
Mcav	Red	3	Red3	DC	8	4	Exopercent	0
Mcav	Red	3	Red3	DC	8		Gastrosep	7.805
Mcav	Red	3	Red3	DC	9	7	Exopercent	0.285714
Mcav	Red	3	Red3	DC	9		Gastrosep	44.16
Mcav	Red	3	Red3	DC	10	5	Exopercent	0
Mcav	Red	3	Red3	DC	10		Gastrosep	4.809
Mcav	Orange	1	Orange1	DC	1	2	Exopercent	0.25
Mcav	Orange	1	Orange1	DC	1		Gastrosep	8.025
Mcav	Orange	1	Orange1	DC	2	3	Exopercent	0
Mcav	Orange	1	Orange1	DC	2		Gastrosep	9.375
Mcav	Orange	1	Orange1	DC	3	10	Exopercent	0.142857
Mcav	Orange	1	Orange1	DC	3		Gastrosep	na
Mcav	Orange	1	Orange1	DC	4	5	Exopercent	0
Mcav	Orange	1	Orange1	DC	4		Gastrosep	16.875
Mcav	Orange	1	Orange1	DC	5	12	Exopercent	0.125
Mcav	Orange	1	Orange1	DC	5		Gastrosep	0
Mcav	Orange	1	Orange1	DC	6	2	Exopercent	0.4
Mcav	Orange	1	Orange1	DC	6		Gastrosep	22.81
Mcav	Orange	1	Orange1	DC	7	11	Exopercent	0.0666667
Mcav	Orange	1	Orange1	DC	7		Gastrosep	10.201
Mcav	Orange	1	Orange1	DC	8	2	Exopercent	0
Mcav	Orange	1	Orange1	DC	8		Gastrosep	63.09
Mcav	Orange	1	Orange1	DC	10	10	Exopercent	0.25
Mcav	Orange	1	Orange1	DC	10		Gastrosep	29.773
Mcav	Orange	1	Orange1	DC			Zooxarea	0.294541
Mcav	Orange	1	Orange1	DC			Zooxarea	0.309566
Mcav	Orange	1	Orange1	DC			Zooxarea	0.554375
Mcav	Orange	1	Orange1	DC			Zooxarea	0.479696
Mcav	Orange	1	Orange1	DC			Zooxarea	0.432841
Mcav	Orange	1	Orange1	DC			Zooxarea	0.986481
Mcav	Orange	1	Orange1	DC			Zooxarea	0.86668
Mcav	Orange	1	Orange1	DC			Zooxarea	0.394988
Mcav	Orange	1	Orange1	DC			Zooxarea	0.62142
Mcav	Orange	1	Orange1	DC			Zooxarea	0.279081
Mcav	Orange	1	Orange1	DC			Zooxarea	0.463196
Mcav	Orange	1	Orange1	DC			Zooxarea	0.439651
Mcav	Orange	1	Orange1	DC			Zooxarea	0.502341
Mcav	Orange	1	Orange1	DC			Zooxarea	0.288009
Mcav	Orange	1	Orange1	DC			Zooxarea	0.888866
Mcav	Orange	1	Orange1	DC			Zooxarea	0.251803
Mcav	Orange	1	Orange1	DC			Zooxarea	0.368282
Mcav	Orange	1	Orange1	DC			Zooxarea	0.586733
Mcav	Orange	1	Orange1	DC			Zooxarea	0.552568
Mcav	Orange	1	Orange1	DC			Zooxarea	0.511867
Mcav	Orange	1	Orange1	DC			Zooxarea	0.355956
Mcav	Orange	1	Orange1	DC			Zooxarea	0.378837
Mcav	Orange	1	Orange1	DC			Zooxarea	0.503727
Mcav	Orange	1	Orange1	DC			Zooxarea	0.325435
Mcav	Orange	1	Orange1	DC			Zooxarea	0.454778
Mcav	Orange	3	Orange3	DC	1	3	Exopercent	0
Mcav	Orange	3	Orange3	DC	1		Gastrosep	27.76
Mcav	Orange	3	Orange3	DC	2	6	Exopercent	0
Mcav	Orange	3	Orange3	DC	2		Gastrosep	25.15
Mcav	Orange	3	Orange3	DC	3	12	Exopercent	0.25
Mcav	Orange	3	Orange3	DC	3		Gastrosep	36.792
Mcav	Orange	3	Orange3	DC	4	8	Exopercent	0.111111
Mcav	Orange	3	Orange3	DC	4		Gastrosep	19.932
Mcav	Orange	3	Orange3	DC	5	9	Exopercent	0
Mcav	Orange	3	Orange3	DC	5		Gastrosep	48.031
Mcav	Orange	3	Orange3	DC	6	10	Exopercent	0.157895
Mcav	Orange	3	Orange3	DC	6		Gastrosep	22.946
Mcav	Orange	3	Orange3	DC	7	5	Exopercent	0.428571
Mcav	Orange	3	Orange3	DC	7		Gastrosep	25.831
Mcav	Orange	3	Orange3	DC	8	2	Exopercent	0.230769
Mcav	Orange	3	Orange3	DC	8		Gastrosep	73.609
Mcav	Orange	3	Orange3	DC	9	10	Exopercent	0
Mcav	Orange	3	Orange3	DC	9		Gastrosep	NA
Mcav	Orange	3	Orange3	DC	10	3	Exopercent	0
Mcav	Orange	3	Orange3	DC	10		Gastrosep	14.873
Mcav	Orange	3	Orange3	DC			Zooxarea	0.555125
Mcav	Orange	3	Orange3	DC			Zooxarea	0.615467
Mcav	Orange	3	Orange3	DC			Zooxarea	0.574045
Mcav	Orange	3	Orange3	DC			Zooxarea	0.428754
Mcav	Orange	3	Orange3	DC			Zooxarea	0.746173
Mcav	Orange	3	Orange3	DC			Zooxarea	0.700072
Mcav	Orange	3	Orange3	DC			Zooxarea	0.628824
Mcav	Orange	3	Orange3	DC			Zooxarea	0.604984
Mcav	Orange	3	Orange3	DC			Zooxarea	0.31057
Mcav	Orange	3	Orange3	DC			Zooxarea	0.693829
Mcav	Orange	3	Orange3	DC			Zooxarea	0.658391
Mcav	Orange	3	Orange3	DC			Zooxarea	0.643174
Mcav	Orange	3	Orange3	DC			Zooxarea	0.581918
Mcav	Orange	3	Orange3	DC			Zooxarea	0.571906
Mcav	Orange	3	Orange3	DC			Zooxarea	0.668074
Mcav	Orange	3	Orange3	DC			Zooxarea	0.543656
Mcav	Orange	3	Orange3	DC			Zooxarea	0.441827
Mcav	Orange	3	Orange3	DC			Zooxarea	0.587246
Mcav	Orange	3	Orange3	DC			Zooxarea	0.395734
Mcav	Orange	3	Orange3	DC			Zooxarea	0.516004
Mcav	Orange	3	Orange3	DC			Zooxarea	0.446244
Mcav	Orange	3	Orange3	DC			Zooxarea	0.503606
Mcav	Orange	3	Orange3	DC			Zooxarea	0.450711
Mcav	Orange	3	Orange3	DC			Zooxarea	0.409633
Mcav	Orange	3	Orange3	DC			Zooxarea	0.446708
Mcav	Red	2	Red2	DC	1	6	Exopercent	0
Mcav	Red	2	Red2	DC	1		Gastrosep	15
Mcav	Red	2	Red2	DC	2	1	Exopercent	0.222222
Mcav	Red	2	Red2	DC	2		Gastrosep	26.943
Mcav	Red	2	Red2	DC	3	5	Exopercent	0.2
Mcav	Red	2	Red2	DC	3		Gastrosep	0
Mcav	Red	2	Red2	DC	4	11	Exopercent	0.333333
Mcav	Red	2	Red2	DC	4		Gastrosep	17.172
Mcav	Red	2	Red2	DC	5	3	Exopercent	0
Mcav	Red	2	Red2	DC	5		Gastrosep	30.55
Mcav	Red	2	Red2	DC	6	11	Exopercent	0.142857
Mcav	Red	2	Red2	DC	6		Gastrosep	20.652
Mcav	Red	2	Red2	DC	7	9	Exopercent	0.0769231
Mcav	Red	2	Red2	DC	7		Gastrosep	22.541
Mcav	Red	2	Red2	DC	8	4	Exopercent	0.181818
Mcav	Red	2	Red2	DC	8		Gastrosep	19.761
Mcav	Red	2	Red2	DC	9	1	Exopercent	0.181818
Mcav	Red	2	Red2	DC	9		Gastrosep	23.192
Mcav	Red	2	Red2	DC	10	10	Exopercent	0.375
Mcav	Red	2	Red2	DC	10		Gastrosep	20.963
Mcav	Red	2	Red2	DC			Zooxarea	0.555251
Mcav	Red	2	Red2	DC			Zooxarea	0.440231
Mcav	Red	2	Red2	DC			Zooxarea	0.451672
Mcav	Red	2	Red2	DC			Zooxarea	0.350718
Mcav	Red	2	Red2	DC			Zooxarea	0.327975
Mcav	Red	2	Red2	DC			Zooxarea	0.530417
Mcav	Red	2	Red2	DC			Zooxarea	0.487371
Mcav	Red	2	Red2	DC			Zooxarea	0.514278
Mcav	Red	2	Red2	DC			Zooxarea	0.403035
Mcav	Red	2	Red2	DC			Zooxarea	0.700169
Mcav	Red	2	Red2	DC			Zooxarea	0.720064
Mcav	Red	2	Red2	DC			Zooxarea	0.378571
Mcav	Red	2	Red2	DC			Zooxarea	0.512932
Mcav	Red	2	Red2	DC			Zooxarea	0.37215
Mcav	Red	2	Red2	DC			Zooxarea	0.321797
Mcav	Red	2	Red2	DC			Zooxarea	0.458794
Mcav	Red	2	Red2	DC			Zooxarea	0.572712
Mcav	Red	2	Red2	DC			Zooxarea	0.411311
Mcav	Red	2	Red2	DC			Zooxarea	0.473591
Mcav	Red	2	Red2	DC			Zooxarea	0.403029
Mcav	Red	2	Red2	DC			Zooxarea	0.505808
Mcav	Red	2	Red2	DC			Zooxarea	0.564766
Mcav	Red	2	Red2	DC			Zooxarea	0.544483
Mcav	Red	2	Red2	DC			Zooxarea	0.382206
Mcav	Red	2	Red2	DC			Zooxarea	0.367819
Ofav	Red	3	Red3	DC	6	3	Exopercent	0.125
Ofav	Red	3	Red3	DC	6		Gastrosep	NA
Ofav	Red	3	Red3	DC	10	7	Exopercent	0.0909091
Ofav	Red	3	Red3	DC	10		Gastrosep	16.211
Ofav	Red	3	Red3	DC	1	7	Exopercent	0.166667
Ofav	Red	3	Red3	DC	1		Gastrosep	24.354
Ofav	Red	3	Red3	DC	2	7	Exopercent	0.2
Ofav	Red	3	Red3	DC	2		Gastrosep	28.958
Ofav	Red	3	Red3	DC	3	4	Exopercent	0.285714
Ofav	Red	3	Red3	DC	3		Gastrosep	0
Ofav	Red	3	Red3	DC	4	1	Exopercent	0.5
Ofav	Red	3	Red3	DC	4		Gastrosep	NA
Ofav	Red	3	Red3	DC	5	11	Exopercent	0.125
Ofav	Red	3	Red3	DC	5		Gastrosep	NA
Ofav	Red	3	Red3	DC	7	3	Exopercent	0
Ofav	Red	3	Red3	DC	7		Gastrosep	15.052
Ofav	Red	3	Red3	DC	8	7	Exopercent	0.285714
Ofav	Red	3	Red3	DC	8		Gastrosep	19.482
Ofav	Red	3	Red3	DC	9	11	Exopercent	0.1
Ofav	Red	3	Red3	DC	9		Gastrosep	NA
Ofav	Red	3	Red3	DC			Zooxarea	0.729699
Ofav	Red	3	Red3	DC			Zooxarea	0.490547
Ofav	Red	3	Red3	DC			Zooxarea	0.575705
Ofav	Red	3	Red3	DC			Zooxarea	0.593056
Ofav	Red	3	Red3	DC			Zooxarea	0.533895
Ofav	Red	3	Red3	DC			Zooxarea	0.590708
Ofav	Red	3	Red3	DC			Zooxarea	0.372009
Ofav	Red	3	Red3	DC			Zooxarea	0.479932
Ofav	Red	3	Red3	DC			Zooxarea	0.437237
Ofav	Red	3	Red3	DC			Zooxarea	0.468213
Ofav	Red	3	Red3	DC			Zooxarea	0.245567
Ofav	Red	3	Red3	DC			Zooxarea	0.403282
Ofav	Red	3	Red3	DC			Zooxarea	0.190224
Ofav	Red	3	Red3	DC			Zooxarea	0.713404
Ofav	Red	3	Red3	DC			Zooxarea	0.271064
Ofav	Red	3	Red3	DC			Zooxarea	0.415713
Ofav	Red	3	Red3	DC			Zooxarea	0.316997
Ofav	Red	3	Red3	DC			Zooxarea	0.415804
Ofav	Red	3	Red3	DC			Zooxarea	0.364748
Ofav	Red	3	Red3	DC			Zooxarea	0.307114
Ofav	Red	3	Red3	DC			Zooxarea	0.470351
Ofav	Red	3	Red3	DC			Zooxarea	0.439886
Ofav	Red	3	Red3	DC			Zooxarea	0.563075
Ofav	Red	3	Red3	DC			Zooxarea	0.502691
Ofav	Red	3	Red3	DC			Zooxarea	0.354928
Ofav	Red	1	Red1	DC	1	5	Gastrosep	NA
Ofav	Red	1	Red1	DC	1		Exopercent	0.2
Ofav	Red	1	Red1	DC	2	12	Gastrosep	NA
Ofav	Red	1	Red1	DC	2		Exopercent	0.1
Ofav	Red	1	Red1	DC	3	8	Exopercent	0.333333
Ofav	Red	1	Red1	DC	3		Gastrosep	NA
Ofav	Red	1	Red1	DC	4	2	Exopercent	0.2
Ofav	Red	1	Red1	DC	4		Gastrosep	NA
Ofav	Red	1	Red1	DC			Zooxarea	0.397917
Ofav	Red	1	Red1	DC			Zooxarea	0.517715
Ofav	Red	1	Red1	DC			Zooxarea	0.438486
Ofav	Red	1	Red1	DC			Zooxarea	0.515657
Ofav	Red	1	Red1	DC			Zooxarea	0.507944
Ofav	Red	1	Red1	DC			Zooxarea	0.349628
Ofav	Red	1	Red1	DC			Zooxarea	0.453374
Ofav	Red	1	Red1	DC			Zooxarea	0.430515
Ofav	Red	1	Red1	DC			Zooxarea	0.422763
Ofav	Red	1	Red1	DC			Zooxarea	0.373693
Ofav	Red	1	Red1	DC			Zooxarea	0.674699
Ofav	Red	1	Red1	DC			Zooxarea	0.488609
Ofav	Red	1	Red1	DC			Zooxarea	0.456307
Ofav	Red	1	Red1	DC			Zooxarea	0.423299
Ofav	Red	1	Red1	DC			Zooxarea	0.289819
Ofav	Red	1	Red1	DC			Zooxarea	0.448558
Ofav	Red	1	Red1	DC			Zooxarea	0.490496
Ofav	Red	1	Red1	DC			Zooxarea	0.226001
Ofav	Red	1	Red1	DC			Zooxarea	0.476163
Ofav	Red	1	Red1	DC			Zooxarea	0.444153
Ofav	Red	1	Red1	DC			Zooxarea	0.446085
Ofav	Red	1	Red1	DC			Zooxarea	0.413149
Ofav	Red	1	Red1	DC			Zooxarea	0.323506
Ofav	Red	1	Red1	DC			Zooxarea	0.338226
Ofav	Red	1	Red1	DC			Zooxarea	0.268738
Ofav	Red	1	Red1	DC	5	3	Exopercent	0
Ofav	Red	1	Red1	DC	5		Gastrosep	61.881
Ofav	Red	1	Red1	DC	6	8	Exopercent	0.25
Ofav	Red	1	Red1	DC	6		Gastrosep	36.177
Ofav	Red	1	Red1	DC	7	7	Exopercent	0
Ofav	Red	1	Red1	DC	7		Gastrosep	42.532
Ofav	Red	2	Red2	DC	1	10	Exopercent	0.0714286
Ofav	Red	2	Red2	DC	1		Gastrosep	NA
Ofav	Red	2	Red2	DC	2	12	Exopercent	0.5
Ofav	Red	2	Red2	DC	2		Gastrosep	NA
Ofav	Red	2	Red2	DC	3	12	Exopercent	0.25
Ofav	Red	2	Red2	DC	3		Gastrosep	23.2
Ofav	Red	2	Red2	DC	4	6	Exopercent	0
Ofav	Red	2	Red2	DC	4		Gastrosep	32.463
Ofav	Red	2	Red2	DC	5	8	Exopercent	0
Ofav	Red	2	Red2	DC	5		Gastrosep	43.781
Ofav	Red	2	Red2	DC			Zooxarea	0.557782
Ofav	Red	2	Red2	DC			Zooxarea	0.437602
Ofav	Red	2	Red2	DC			Zooxarea	0.743764
Ofav	Red	2	Red2	DC			Zooxarea	0.333503
Ofav	Red	2	Red2	DC			Zooxarea	0.320658
Ofav	Red	2	Red2	DC			Zooxarea	0.570819
Ofav	Red	2	Red2	DC			Zooxarea	0.48083
Ofav	Red	2	Red2	DC			Zooxarea	0.390184
Ofav	Red	2	Red2	DC			Zooxarea	0.374596
Ofav	Red	2	Red2	DC			Zooxarea	0.569968
Ofav	Red	2	Red2	DC			Zooxarea	0.381911
Ofav	Red	2	Red2	DC			Zooxarea	0.597807
Ofav	Red	2	Red2	DC			Zooxarea	0.596573
Ofav	Red	2	Red2	DC			Zooxarea	0.477349
Ofav	Red	2	Red2	DC			Zooxarea	0.547697
Ofav	Red	2	Red2	DC			Zooxarea	0.468202
Ofav	Red	2	Red2	DC			Zooxarea	0.35433
Ofav	Red	2	Red2	DC			Zooxarea	0.281308
Ofav	Red	2	Red2	DC			Zooxarea	0.432384
Ofav	Red	2	Red2	DC			Zooxarea	0.44693
Ofav	Red	2	Red2	DC			Zooxarea	0.34033
Ofav	Red	2	Red2	DC			Zooxarea	0.5924
Ofav	Red	2	Red2	DC			Zooxarea	0.500137
Ofav	Red	2	Red2	DC			Zooxarea	0.532132
Ofav	Red	2	Red2	DC			Zooxarea	0.490645
Ofav	Red	2	Red2	DC	6	11	Exopercent	0.25
Ofav	Red	2	Red2	DC	6		Gastrosep	27.8
Ofav	Red	2	Red2	DC	7	7	Exopercent	0
Ofav	Red	2	Red2	DC	7		Gastrosep	40.186
Ofav	Red	2	Red2	DC	8	2	Exopercent	0
Ofav	Red	2	Red2	DC	8		Gastrosep	60.751
Ofav	Yellow	1	Yellow1	DC	1	9	Exopercent	0
Ofav	Yellow	1	Yellow1	DC	1		Gastrosep	28.153
Ofav	Yellow	1	Yellow1	DC	2	8	Exopercent	0
Ofav	Yellow	1	Yellow1	DC	2		Gastrosep	25.085
Ofav	Yellow	1	Yellow1	DC	3	9	Exopercent	0
Ofav	Yellow	1	Yellow1	DC	3		Gastrosep	28.224
Ofav	Yellow	1	Yellow1	DC			Zooxarea	0.662923
Ofav	Yellow	1	Yellow1	DC			Zooxarea	0.631303
Ofav	Yellow	1	Yellow1	DC			Zooxarea	0.533348
Ofav	Yellow	1	Yellow1	DC			Zooxarea	0.672944
Ofav	Yellow	1	Yellow1	DC			Zooxarea	0.534222
Ofav	Yellow	1	Yellow1	DC			Zooxarea	0.345718
Ofav	Yellow	1	Yellow1	DC			Zooxarea	0.555454
Ofav	Yellow	1	Yellow1	DC			Zooxarea	0.448166
Ofav	Yellow	1	Yellow1	DC			Zooxarea	0.416409
Ofav	Yellow	1	Yellow1	DC			Zooxarea	0.486048
Ofav	Yellow	1	Yellow1	DC			Zooxarea	0.598271
Ofav	Yellow	1	Yellow1	DC			Zooxarea	0.396272
Ofav	Yellow	1	Yellow1	DC			Zooxarea	0.522395
Ofav	Yellow	1	Yellow1	DC			Zooxarea	0.598096
Ofav	Yellow	1	Yellow1	DC			Zooxarea	0.464656
Ofav	Yellow	1	Yellow1	DC			Zooxarea	0.606328
Ofav	Yellow	1	Yellow1	DC			Zooxarea	0.443118
Ofav	Yellow	1	Yellow1	DC			Zooxarea	0.614921
Ofav	Yellow	1	Yellow1	DC			Zooxarea	0.603456
Ofav	Yellow	1	Yellow1	DC			Zooxarea	0.30468
Ofav	Yellow	1	Yellow1	DC			Zooxarea	0.33896
Ofav	Yellow	1	Yellow1	DC			Zooxarea	0.437652
Ofav	Yellow	1	Yellow1	DC			Zooxarea	0.51271
Ofav	Yellow	1	Yellow1	DC			Zooxarea	0.556546
Ofav	Yellow	1	Yellow1	DC			Zooxarea	0.513376
Ofav	Yellow	1	Yellow1	DC	4	3	Exopercent	0
Ofav	Yellow	1	Yellow1	DC	4		Gastrosep	19.345
Ofav	Yellow	1	Yellow1	DC	5	2	Exopercent	0
Ofav	Yellow	1	Yellow1	DC	5		Gastrosep	0
Ofav	Yellow	1	Yellow1	DC	6	7	Exopercent	0
Ofav	Yellow	1	Yellow1	DC	6		Gastrosep	18.235
Ofav	Yellow	1	Yellow1	DC	7	7	Exopercent	0
Ofav	Yellow	1	Yellow1	DC	7		Gastrosep	0
Ofav	Yellow	1	Yellow1	DC	8	10	Exopercent	0.0666667
Ofav	Yellow	1	Yellow1	DC	8		Gastrosep	43.956
Ofav	Yellow	3	Yellow3	DC	1	12	Exopercent	0
Ofav	Yellow	3	Yellow3	DC	1		Gastrosep	51.061
Ofav	Yellow	3	Yellow3	DC	2	11	Exopercent	0.0909091
Ofav	Yellow	3	Yellow3	DC	2		Gastrosep	34.874
Ofav	Yellow	3	Yellow3	DC	3	7	Exopercent	0
Ofav	Yellow	3	Yellow3	DC	3		Gastrosep	47.314
Ofav	Yellow	3	Yellow3	DC	4	8	Exopercent	0.333333
Ofav	Yellow	3	Yellow3	DC	4		Gastrosep	63.159
Ofav	Yellow	3	Yellow3	DC			Zooxarea	0.431406
Ofav	Yellow	3	Yellow3	DC			Zooxarea	0.599605
Ofav	Yellow	3	Yellow3	DC			Zooxarea	0.569605
Ofav	Yellow	3	Yellow3	DC			Zooxarea	0.512781
Ofav	Yellow	3	Yellow3	DC			Zooxarea	0.573417
Ofav	Yellow	3	Yellow3	DC			Zooxarea	0.431747
Ofav	Yellow	3	Yellow3	DC			Zooxarea	0.629906
Ofav	Yellow	3	Yellow3	DC			Zooxarea	0.52417
Ofav	Yellow	3	Yellow3	DC			Zooxarea	0.523108
Ofav	Yellow	3	Yellow3	DC			Zooxarea	0.539619
Ofav	Yellow	3	Yellow3	DC			Zooxarea	0.44147
Ofav	Yellow	3	Yellow3	DC			Zooxarea	0.457357
Ofav	Yellow	3	Yellow3	DC			Zooxarea	0.501219
Ofav	Yellow	3	Yellow3	DC			Zooxarea	0.662928
Ofav	Yellow	3	Yellow3	DC			Zooxarea	0.515716
Ofav	Yellow	3	Yellow3	DC			Zooxarea	0.504723
Ofav	Yellow	3	Yellow3	DC			Zooxarea	0.531755
Ofav	Yellow	3	Yellow3	DC			Zooxarea	0.331279
Ofav	Yellow	3	Yellow3	DC			Zooxarea	0.521887
Ofav	Yellow	3	Yellow3	DC			Zooxarea	0.413368
Ofav	Yellow	3	Yellow3	DC			Zooxarea	0.292953
Ofav	Yellow	3	Yellow3	DC			Zooxarea	0.310987
Ofav	Yellow	3	Yellow3	DC			Zooxarea	0.686647
Ofav	Yellow	3	Yellow3	DC			Zooxarea	0.423841
Ofav	Yellow	3	Yellow3	DC			Zooxarea	0.411733
Ofav	Yellow	3	Yellow3	DC	5	3	Exopercent	0.333333
Ofav	Yellow	3	Yellow3	DC	5		Gastrosep	28.742
Ofav	Yellow	3	Yellow3	DC	6	5	Exopercent	0
Ofav	Yellow	3	Yellow3	DC	6		Gastrosep	0
Ofav	Yellow	3	Yellow3	DC	7	7	Exopercent	0.190476
Ofav	Yellow	3	Yellow3	DC	7		Gastrosep	NA
Ofav	Yellow	3	Yellow3	DC	8	2	Exopercent	0.333333
Ofav	Yellow	3	Yellow3	DC	8		Gastrosep	NA
Mcav	Orange	1	Orange1	HS	1	12	Exopercent	0
Mcav	Orange	1	Orange1	HS	1		Gastrosep	22.815
Mcav	Orange	1	Orange1	HS	2	6	Exopercent	0
Mcav	Orange	1	Orange1	HS	2		Gastrosep	26.481
Mcav	Orange	1	Orange1	HS	3	9	Exopercent	0
Mcav	Orange	1	Orange1	HS	3		Gastrosep	7.634
Mcav	Orange	1	Orange1	HS			Zooxarea	0.463059
Mcav	Orange	1	Orange1	HS			Zooxarea	0.568459
Mcav	Orange	1	Orange1	HS			Zooxarea	0.467744
Mcav	Orange	1	Orange1	HS			Zooxarea	0.469867
Mcav	Orange	1	Orange1	HS			Zooxarea	0.470218
Mcav	Orange	1	Orange1	HS			Zooxarea	0.613041
Mcav	Orange	1	Orange1	HS			Zooxarea	0.543821
Mcav	Orange	1	Orange1	HS			Zooxarea	0.408438
Mcav	Orange	1	Orange1	HS			Zooxarea	0.388721
Mcav	Orange	1	Orange1	HS			Zooxarea	0.522372
Mcav	Orange	1	Orange1	HS			Zooxarea	0.700524
Mcav	Orange	1	Orange1	HS			Zooxarea	0.529016
Mcav	Orange	1	Orange1	HS			Zooxarea	0.851885
Mcav	Orange	1	Orange1	HS			Zooxarea	0.581887
Mcav	Orange	1	Orange1	HS			Zooxarea	0.38017
Mcav	Orange	1	Orange1	HS			Zooxarea	0.357896
Mcav	Orange	1	Orange1	HS			Zooxarea	0.501565
Mcav	Orange	1	Orange1	HS			Zooxarea	0.523379
Mcav	Orange	1	Orange1	HS			Zooxarea	0.39746
Mcav	Orange	1	Orange1	HS			Zooxarea	0.453248
Mcav	Orange	1	Orange1	HS			Zooxarea	0.428812
Mcav	Orange	1	Orange1	HS			Zooxarea	0.502978
Mcav	Orange	1	Orange1	HS			Zooxarea	0.5261
Mcav	Orange	1	Orange1	HS			Zooxarea	0.454775
Mcav	Orange	1	Orange1	HS			Zooxarea	0.515595
Mcav	Orange	1	Orange1	HS	4	6	Exopercent	0.285714
Mcav	Orange	1	Orange1	HS	4		Gastrosep	10.026
Mcav	Orange	1	Orange1	HS	5	6	Exopercent	0.3
Mcav	Orange	1	Orange1	HS	5		Gastrosep	31.293
Mcav	Orange	1	Orange1	HS	6	4	Exopercent	0.0909091
Mcav	Orange	1	Orange1	HS	6		Gastrosep	14.743
Mcav	Orange	1	Orange1	HS	7	7	Exopercent	0.142857
Mcav	Orange	1	Orange1	HS	7		Gastrosep	19.377
Mcav	Orange	1	Orange1	HS	8	8	Exopercent	0
Mcav	Orange	1	Orange1	HS	8		Gastrosep	0
Mcav	Orange	1	Orange1	HS	9	5	Exopercent	0.0625
Mcav	Orange	1	Orange1	HS	9		Gastrosep	13.746
Mcav	Orange	1	Orange1	HS	10	12	Exopercent	0
Mcav	Orange	1	Orange1	HS	10		Gastrosep	10.06
Mcav	Orange	2	Orange2	HS	1	2	Exopercent	0.15
Mcav	Orange	2	Orange2	HS	1		Gastrosep	73.732
Mcav	Orange	2	Orange2	HS	2	9	Exopercent	0
Mcav	Orange	2	Orange2	HS	2		Gastrosep	0
Mcav	Orange	2	Orange2	HS	3	12	Exopercent	0
Mcav	Orange	2	Orange2	HS	3		Gastrosep	31.126
Mcav	Orange	2	Orange2	HS	4	3	Exopercent	0.153846
Mcav	Orange	2	Orange2	HS	4		Gastrosep	29.625
Mcav	Orange	2	Orange2	HS	5	2	Exopercent	0.05
Mcav	Orange	2	Orange2	HS	5		Gastrosep	32.673
Mcav	Orange	2	Orange2	HS	6	6	Exopercent	0
Mcav	Orange	2	Orange2	HS	6		Gastrosep	37.215
Mcav	Orange	2	Orange2	HS	7	3	Exopercent	0
Mcav	Orange	2	Orange2	HS	7		Gastrosep	15.693
Mcav	Orange	2	Orange2	HS	8	12	Exopercent	0.333333
Mcav	Orange	2	Orange2	HS	8		Gastrosep	35.859
Mcav	Orange	2	Orange2	HS	9	1	Exopercent	0
Mcav	Orange	2	Orange2	HS	9		Gastrosep	8.549
Mcav	Orange	2	Orange2	HS	10	3	Exopercent	0.0833333
Mcav	Orange	2	Orange2	HS	10		Gastrosep	0
Mcav	Orange	2	Orange2	HS			Zooxarea	0.373118
Mcav	Orange	2	Orange2	HS			Zooxarea	0.509607
Mcav	Orange	2	Orange2	HS			Zooxarea	0.458199
Mcav	Orange	2	Orange2	HS			Zooxarea	0.47751
Mcav	Orange	2	Orange2	HS			Zooxarea	0.606964
Mcav	Orange	2	Orange2	HS			Zooxarea	0.435915
Mcav	Orange	2	Orange2	HS			Zooxarea	0.511532
Mcav	Orange	2	Orange2	HS			Zooxarea	0.28167
Mcav	Orange	2	Orange2	HS			Zooxarea	0.598969
Mcav	Orange	2	Orange2	HS			Zooxarea	0.586318
Mcav	Orange	2	Orange2	HS			Zooxarea	0.43385
Mcav	Orange	2	Orange2	HS			Zooxarea	0.810243
Mcav	Orange	2	Orange2	HS			Zooxarea	0.617403
Mcav	Orange	2	Orange2	HS			Zooxarea	0.515677
Mcav	Orange	2	Orange2	HS			Zooxarea	0.40955
Mcav	Orange	2	Orange2	HS			Zooxarea	0.398315
Mcav	Orange	2	Orange2	HS			Zooxarea	0.709382
Mcav	Orange	2	Orange2	HS			Zooxarea	0.598709
Mcav	Orange	2	Orange2	HS			Zooxarea	0.634048
Mcav	Orange	2	Orange2	HS			Zooxarea	0.494697
Mcav	Orange	2	Orange2	HS			Zooxarea	0.500771
Mcav	Orange	2	Orange2	HS			Zooxarea	0.676103
Mcav	Orange	2	Orange2	HS			Zooxarea	0.618827
Mcav	Orange	2	Orange2	HS			Zooxarea	0.585181
Mcav	Orange	2	Orange2	HS			Zooxarea	0.548052
Mcav	Orange	3	Orange3	HS	1	8	Exopercent	0.05
Mcav	Orange	3	Orange3	HS	1		Gastrosep	34.008
Mcav	Orange	3	Orange3	HS	2	7	Exopercent	0.136364
Mcav	Orange	3	Orange3	HS	2		Gastrosep	0
Mcav	Orange	3	Orange3	HS	3	10	Exopercent	0
Mcav	Orange	3	Orange3	HS	3		Gastrosep	0
Mcav	Orange	3	Orange3	HS	4	6	Exopercent	0.0666667
Mcav	Orange	3	Orange3	HS	4		Gastrosep	8.549
Mcav	Orange	3	Orange3	HS	5	7	Exopercent	0.125
Mcav	Orange	3	Orange3	HS	5		Gastrosep	52.271
Mcav	Orange	3	Orange3	HS	6	3	Exopercent	0.157895
Mcav	Orange	3	Orange3	HS	6		Gastrosep	40.284
Mcav	Orange	3	Orange3	HS	7	12	Exopercent	0.4
Mcav	Orange	3	Orange3	HS	7		Gastrosep	18.385
Mcav	Orange	3	Orange3	HS	8	7	Exopercent	0.133333
Mcav	Orange	3	Orange3	HS	8		Gastrosep	0
Mcav	Orange	3	Orange3	HS	9	11	Exopercent	0
Mcav	Orange	3	Orange3	HS	9		Gastrosep	15.464
Mcav	Orange	3	Orange3	HS	10	5	Exopercent	0.111111
Mcav	Orange	3	Orange3	HS	10		Gastrosep	21.34
Mcav	Orange	3	Orange3	HS			Zooxarea	0.508222
Mcav	Orange	3	Orange3	HS			Zooxarea	0.59814
Mcav	Orange	3	Orange3	HS			Zooxarea	0.592232
Mcav	Orange	3	Orange3	HS			Zooxarea	0.600809
Mcav	Orange	3	Orange3	HS			Zooxarea	0.578654
Mcav	Orange	3	Orange3	HS			Zooxarea	0.70908
Mcav	Orange	3	Orange3	HS			Zooxarea	0.498913
Mcav	Orange	3	Orange3	HS			Zooxarea	0.504746
Mcav	Orange	3	Orange3	HS			Zooxarea	0.578588
Mcav	Orange	3	Orange3	HS			Zooxarea	0.71936
Mcav	Orange	3	Orange3	HS			Zooxarea	0.529405
Mcav	Orange	3	Orange3	HS			Zooxarea	0.443969
Mcav	Orange	3	Orange3	HS			Zooxarea	0.491811
Mcav	Orange	3	Orange3	HS			Zooxarea	0.505895
Mcav	Orange	3	Orange3	HS			Zooxarea	0.537403
Mcav	Orange	3	Orange3	HS			Zooxarea	0.570352
Mcav	Orange	3	Orange3	HS			Zooxarea	0.540631
Mcav	Orange	3	Orange3	HS			Zooxarea	0.649142
Mcav	Orange	3	Orange3	HS			Zooxarea	0.387715
Mcav	Orange	3	Orange3	HS			Zooxarea	0.679693
Mcav	Orange	3	Orange3	HS			Zooxarea	0.469283
Mcav	Orange	3	Orange3	HS			Zooxarea	0.516196
Mcav	Orange	3	Orange3	HS			Zooxarea	0.562035
Mcav	Orange	3	Orange3	HS			Zooxarea	0.75787
Mcav	Orange	3	Orange3	HS			Zooxarea	0.458053
Mcav	Red	1	Red1	HS	1	6	Exopercent	0
Mcav	Red	1	Red1	HS	1		Gastrosep	10.188
Mcav	Red	1	Red1	HS	2	3	Exopercent	0
Mcav	Red	1	Red1	HS	2		Gastrosep	27.696
Mcav	Red	1	Red1	HS	3	12	Exopercent	0
Mcav	Red	1	Red1	HS	3		Gastrosep	33.418
Mcav	Red	1	Red1	HS	4	1	Exopercent	0
Mcav	Red	1	Red1	HS	4		Gastrosep	8.413
Mcav	Red	1	Red1	HS	5	10	Exopercent	0.0714286
Mcav	Red	1	Red1	HS	5		Gastrosep	9.723
Mcav	Red	1	Red1	HS	6	7	Exopercent	0.0625
Mcav	Red	1	Red1	HS	6		Gastrosep	0
Mcav	Red	1	Red1	HS	7	12	Exopercent	0.2
Mcav	Red	1	Red1	HS	7		Gastrosep	0
Mcav	Red	1	Red1	HS	8	8	Exopercent	0
Mcav	Red	1	Red1	HS	8		Gastrosep	0
Mcav	Red	1	Red1	HS	9	7	Exopercent	0
Mcav	Red	1	Red1	HS	9		Gastrosep	23.313
Mcav	Red	1	Red1	HS	10	3	Exopercent	0.00970874
Mcav	Red	1	Red1	HS	10		Gastrosep	38.303
Mcav	Red	1	Red1	HS			Zooxarea	0.538867
Mcav	Red	1	Red1	HS			Zooxarea	0.711948
Mcav	Red	1	Red1	HS			Zooxarea	0.656035
Mcav	Red	1	Red1	HS			Zooxarea	0.583975
Mcav	Red	1	Red1	HS			Zooxarea	0.640161
Mcav	Red	1	Red1	HS			Zooxarea	0.561388
Mcav	Red	1	Red1	HS			Zooxarea	0.525976
Mcav	Red	1	Red1	HS			Zooxarea	0.556187
Mcav	Red	1	Red1	HS			Zooxarea	0.542496
Mcav	Red	1	Red1	HS			Zooxarea	0.492818
Mcav	Red	1	Red1	HS			Zooxarea	0.512823
Mcav	Red	1	Red1	HS			Zooxarea	0.548707
Mcav	Red	1	Red1	HS			Zooxarea	0.335484
Mcav	Red	1	Red1	HS			Zooxarea	0.583506
Mcav	Red	1	Red1	HS			Zooxarea	0.468862
Mcav	Red	1	Red1	HS			Zooxarea	0.537669
Mcav	Red	1	Red1	HS			Zooxarea	0.722159
Mcav	Red	1	Red1	HS			Zooxarea	0.461201
Mcav	Red	1	Red1	HS			Zooxarea	0.612584
Mcav	Red	1	Red1	HS			Zooxarea	0.574006
Mcav	Red	1	Red1	HS			Zooxarea	0.525575
Mcav	Red	1	Red1	HS			Zooxarea	0.420818
Mcav	Red	1	Red1	HS			Zooxarea	0.536343
Mcav	Red	1	Red1	HS			Zooxarea	0.555871
Mcav	Red	1	Red1	HS			Zooxarea	0.449525
Mcav	Red	2	Red2	HS	1	4	Exopercent	0
Mcav	Red	2	Red2	HS	1		Gastrosep	0
Mcav	Red	2	Red2	HS	2	5	Exopercent	0.333333
Mcav	Red	2	Red2	HS	2		Gastrosep	11.854
Mcav	Red	2	Red2	HS	3	7	Exopercent	0
Mcav	Red	2	Red2	HS	3		Gastrosep	17.323
Mcav	Red	2	Red2	HS	4	9	Exopercent	0.6
Mcav	Red	2	Red2	HS	4		Gastrosep	NA
Mcav	Red	2	Red2	HS	5	2	Exopercent	0.0666667
Mcav	Red	2	Red2	HS	5		Gastrosep	14.88
Mcav	Red	2	Red2	HS	6	10	Exopercent	0
Mcav	Red	2	Red2	HS	6		Gastrosep	18.728
Mcav	Red	2	Red2	HS	7	11	Exopercent	0.2
Mcav	Red	2	Red2	HS	7		Gastrosep	50.67
Mcav	Red	2	Red2	HS	8	7	Exopercent	0
Mcav	Red	2	Red2	HS	8		Gastrosep	0
Mcav	Red	2	Red2	HS	9	12	Exopercent	0
Mcav	Red	2	Red2	HS	9		Gastrosep	15.764
Mcav	Red	2	Red2	HS			Zooxarea	0.564001
Mcav	Red	2	Red2	HS			Zooxarea	0.62456
Mcav	Red	2	Red2	HS			Zooxarea	0.747223
Mcav	Red	2	Red2	HS			Zooxarea	0.478986
Mcav	Red	2	Red2	HS			Zooxarea	0.542196
Mcav	Red	2	Red2	HS			Zooxarea	0.612245
Mcav	Red	2	Red2	HS			Zooxarea	0.46833
Mcav	Red	2	Red2	HS			Zooxarea	0.601953
Mcav	Red	2	Red2	HS			Zooxarea	0.514573
Mcav	Red	2	Red2	HS			Zooxarea	0.68652
Mcav	Red	2	Red2	HS			Zooxarea	0.348384
Mcav	Red	2	Red2	HS			Zooxarea	0.660161
Mcav	Red	2	Red2	HS			Zooxarea	0.578819
Mcav	Red	2	Red2	HS			Zooxarea	0.557495
Mcav	Red	2	Red2	HS			Zooxarea	0.543669
Mcav	Red	2	Red2	HS			Zooxarea	0.387572
Mcav	Red	2	Red2	HS			Zooxarea	0.453368
Mcav	Red	2	Red2	HS			Zooxarea	0.437149
Mcav	Red	2	Red2	HS			Zooxarea	0.554372
Mcav	Red	2	Red2	HS			Zooxarea	0.349082
Mcav	Red	2	Red2	HS			Zooxarea	0.685262
Mcav	Red	2	Red2	HS			Zooxarea	0.455484
Mcav	Red	2	Red2	HS			Zooxarea	0.503156
Mcav	Red	2	Red2	HS			Zooxarea	0.44032
Mcav	Red	2	Red2	HS			Zooxarea	0.640716
Mcav	Red	3	Red3	HS	1	10	Exopercent	0
Mcav	Red	3	Red3	HS	1		Gastrosep	0
Mcav	Red	3	Red3	HS	2	12	Exopercent	0.07
Mcav	Red	3	Red3	HS	2		Gastrosep	14.947
Mcav	Red	3	Red3	HS	3	5	Exopercent	0
Mcav	Red	3	Red3	HS	3		Gastrosep	0
Mcav	Red	3	Red3	HS	4	2	Exopercent	0
Mcav	Red	3	Red3	HS	4		Gastrosep	0
Mcav	Red	3	Red3	HS	5	10	Exopercent	0
Mcav	Red	3	Red3	HS	5		Gastrosep	16.27
Mcav	Red	3	Red3	HS	6	8	Exopercent	0.0769231
Mcav	Red	3	Red3	HS	6		Gastrosep	NA
Mcav	Red	3	Red3	HS	7	7	Exopercent	0
Mcav	Red	3	Red3	HS	7		Gastrosep	0
Mcav	Red	3	Red3	HS	8	6	Exopercent	0
Mcav	Red	3	Red3	HS	8		Gastrosep	9.899
Mcav	Red	3	Red3	HS	9	10	Exopercent	0.117647
Mcav	Red	3	Red3	HS	9		Gastrosep	0
Mcav	Red	3	Red3	HS	10	5	Exopercent	0
Mcav	Red	3	Red3	HS	10		Gastrosep	0
Mcav	Red	3	Red3	HS			Zooxarea	0.375141
Mcav	Red	3	Red3	HS			Zooxarea	0.704555
Mcav	Red	3	Red3	HS			Zooxarea	0.572828
Mcav	Red	3	Red3	HS			Zooxarea	0.408714
Mcav	Red	3	Red3	HS			Zooxarea	0.585458
Mcav	Red	3	Red3	HS			Zooxarea	0.494871
Mcav	Red	3	Red3	HS			Zooxarea	0.646713
Mcav	Red	3	Red3	HS			Zooxarea	0.65072
Mcav	Red	3	Red3	HS			Zooxarea	0.639052
Mcav	Red	3	Red3	HS			Zooxarea	0.610576
Mcav	Red	3	Red3	HS			Zooxarea	0.493899
Mcav	Red	3	Red3	HS			Zooxarea	0.518641
Mcav	Red	3	Red3	HS			Zooxarea	0.524416
Mcav	Red	3	Red3	HS			Zooxarea	0.488683
Mcav	Red	3	Red3	HS			Zooxarea	0.529828
Mcav	Red	3	Red3	HS			Zooxarea	0.620532
Mcav	Red	3	Red3	HS			Zooxarea	0.597022
Mcav	Red	3	Red3	HS			Zooxarea	0.571625
Mcav	Red	3	Red3	HS			Zooxarea	0.61789
Mcav	Red	3	Red3	HS			Zooxarea	0.692644
Mcav	Red	3	Red3	HS			Zooxarea	0.629881
Mcav	Red	3	Red3	HS			Zooxarea	0.582845
Mcav	Red	3	Red3	HS			Zooxarea	0.59437
Mcav	Red	3	Red3	HS			Zooxarea	0.461541
Mcav	Red	3	Red3	HS			Zooxarea	0.533253
Ofav	Orange	1	Orange1	HS	1	9	Exopercent	0
Ofav	Orange	1	Orange1	HS	1		Gastrosep	19.37
Ofav	Orange	1	Orange1	HS	2	2	Exopercent	0
Ofav	Orange	1	Orange1	HS	2		Gastrosep	27.223
Ofav	Orange	1	Orange1	HS	3	2	Exopercent	0.0666667
Ofav	Orange	1	Orange1	HS	3		Gastrosep	0
Ofav	Orange	1	Orange1	HS	4	5	Exopercent	0
Ofav	Orange	1	Orange1	HS	4		Gastrosep	0
Ofav	Orange	1	Orange1	HS	5	5	Exopercent	0.4
Ofav	Orange	1	Orange1	HS	5		Gastrosep	52.933
Ofav	Orange	1	Orange1	HS	6	11	Exopercent	0
Ofav	Orange	1	Orange1	HS	6		Gastrosep	0
Ofav	Orange	1	Orange1	HS	7	6	Exopercent	0
Ofav	Orange	1	Orange1	HS	7		Gastrosep	28.301
Ofav	Orange	1	Orange1	HS	8	7	Exopercent	0
Ofav	Orange	1	Orange1	HS	8		Gastrosep	NA
Ofav	Orange	1	Orange1	HS	9	3	Exopercent	0
Ofav	Orange	1	Orange1	HS	9		Gastrosep	NA
Ofav	Orange	1	Orange1	HS	10	11	Exopercent	0
Ofav	Orange	1	Orange1	HS	10		Gastrosep	0
Ofav	Orange	1	Orange1	HS			Zooxarea	0.345177
Ofav	Orange	1	Orange1	HS			Zooxarea	0.385769
Ofav	Orange	1	Orange1	HS			Zooxarea	0.402189
Ofav	Orange	1	Orange1	HS			Zooxarea	0.611986
Ofav	Orange	1	Orange1	HS			Zooxarea	0.454478
Ofav	Orange	1	Orange1	HS			Zooxarea	0.432268
Ofav	Orange	1	Orange1	HS			Zooxarea	0.640857
Ofav	Orange	1	Orange1	HS			Zooxarea	0.649913
Ofav	Orange	1	Orange1	HS			Zooxarea	0.615575
Ofav	Orange	1	Orange1	HS			Zooxarea	0.584986
Ofav	Orange	1	Orange1	HS			Zooxarea	0.55948
Ofav	Orange	1	Orange1	HS			Zooxarea	0.63254
Ofav	Orange	1	Orange1	HS			Zooxarea	0.55062
Ofav	Orange	1	Orange1	HS			Zooxarea	0.424617
Ofav	Orange	1	Orange1	HS			Zooxarea	0.619949
Ofav	Orange	1	Orange1	HS			Zooxarea	0.55204
Ofav	Orange	1	Orange1	HS			Zooxarea	0.732276
Ofav	Orange	1	Orange1	HS			Zooxarea	0.540128
Ofav	Orange	1	Orange1	HS			Zooxarea	0.45462
Ofav	Orange	1	Orange1	HS			Zooxarea	0.512337
Ofav	Orange	1	Orange1	HS			Zooxarea	0.394992
Ofav	Orange	1	Orange1	HS			Zooxarea	0.617246
Ofav	Orange	1	Orange1	HS			Zooxarea	0.617235
Ofav	Orange	1	Orange1	HS			Zooxarea	0.571799
Ofav	Orange	1	Orange1	HS			Zooxarea	0.473779
Ofav	Orange	2	Orange2	HS	1	1	Exopercent	0
Ofav	Orange	2	Orange2	HS	1		Gastrosep	NA
Ofav	Orange	2	Orange2	HS	2	5	Exopercent	0
Ofav	Orange	2	Orange2	HS	2		Gastrosep	0
Ofav	Orange	2	Orange2	HS	3	4	Exopercent	0
Ofav	Orange	2	Orange2	HS	3		Gastrosep	29.766
Ofav	Orange	2	Orange2	HS	4	8	Exopercent	0.1
Ofav	Orange	2	Orange2	HS	4		Gastrosep	34.465
Ofav	Orange	2	Orange2	HS	5	11	Exopercent	0.1
Ofav	Orange	2	Orange2	HS	5		Gastrosep	0
Ofav	Orange	2	Orange2	HS	6	6	Exopercent	0
Ofav	Orange	2	Orange2	HS	6		Gastrosep	0
Ofav	Orange	2	Orange2	HS	7	3	Exopercent	0
Ofav	Orange	2	Orange2	HS	7		Gastrosep	8.379
Ofav	Orange	2	Orange2	HS	8	5	Exopercent	0.125
Ofav	Orange	2	Orange2	HS	8		Gastrosep	10.645
Ofav	Orange	2	Orange2	HS	9	3	Exopercent	0.125
Ofav	Orange	2	Orange2	HS	9		Gastrosep	40.55
Ofav	Orange	2	Orange2	HS	10	3	Exopercent	0
Ofav	Orange	2	Orange2	HS	10		Gastrosep	0
Ofav	Orange	2	Orange2	HS			Zooxarea	0.406578
Ofav	Orange	2	Orange2	HS			Zooxarea	0.327959
Ofav	Orange	2	Orange2	HS			Zooxarea	0.425742
Ofav	Orange	2	Orange2	HS			Zooxarea	0.237916
Ofav	Orange	2	Orange2	HS			Zooxarea	0.411302
Ofav	Orange	2	Orange2	HS			Zooxarea	0.437744
Ofav	Orange	2	Orange2	HS			Zooxarea	0.58389
Ofav	Orange	2	Orange2	HS			Zooxarea	0.717235
Ofav	Orange	2	Orange2	HS			Zooxarea	0.731238
Ofav	Orange	2	Orange2	HS			Zooxarea	0.506098
Ofav	Orange	2	Orange2	HS			Zooxarea	0.424074
Ofav	Orange	2	Orange2	HS			Zooxarea	0.465474
Ofav	Orange	2	Orange2	HS			Zooxarea	0.464231
Ofav	Orange	2	Orange2	HS			Zooxarea	0.445496
Ofav	Orange	2	Orange2	HS			Zooxarea	0.580433
Ofav	Orange	2	Orange2	HS			Zooxarea	0.502458
Ofav	Orange	2	Orange2	HS			Zooxarea	0.462845
Ofav	Orange	2	Orange2	HS			Zooxarea	0.492932
Ofav	Orange	2	Orange2	HS			Zooxarea	0.403512
Ofav	Orange	2	Orange2	HS			Zooxarea	0.624744
Ofav	Orange	2	Orange2	HS			Zooxarea	0.43429
Ofav	Orange	2	Orange2	HS			Zooxarea	0.499877
Ofav	Orange	2	Orange2	HS			Zooxarea	0.617215
Ofav	Orange	2	Orange2	HS			Zooxarea	0.494159
Ofav	Orange	2	Orange2	HS			Zooxarea	0.450335
Ofav	Red	2	Red2	HS	1	7	Exopercent	0.285714
Ofav	Red	2	Red2	HS	1		Gastrosep	0
Ofav	Red	2	Red2	HS	2	6	Exopercent	0
Ofav	Red	2	Red2	HS	2		Gastrosep	15.115
Ofav	Red	2	Red2	HS	3	8	Exopercent	0
Ofav	Red	2	Red2	HS	3		Gastrosep	36.989
Ofav	Red	2	Red2	HS	4	5	Exopercent	0.2
Ofav	Red	2	Red2	HS	4		Gastrosep	0
Ofav	Red	2	Red2	HS	5	10	Exopercent	0.142857
Ofav	Red	2	Red2	HS	5		Gastrosep	NA
Ofav	Red	2	Red2	HS	6	5	Exopercent	0.125
Ofav	Red	2	Red2	HS	6		Gastrosep	42.24
Ofav	Red	2	Red2	HS	7	7	Exopercent	0
Ofav	Red	2	Red2	HS	7		Gastrosep	0
Ofav	Red	2	Red2	HS	8	10	Exopercent	0.166667
Ofav	Red	2	Red2	HS	8		Gastrosep	0
Ofav	Red	2	Red2	HS	9	12	Exopercent	0.375
Ofav	Red	2	Red2	HS	9		Gastrosep	0
Ofav	Red	2	Red2	HS	10	4	Exopercent	0.333333
Ofav	Red	2	Red2	HS	10		Gastrosep	27.07
Ofav	Red	2	Red2	HS			Zooxarea	0.578931
Ofav	Red	2	Red2	HS			Zooxarea	0.602102
Ofav	Red	2	Red2	HS			Zooxarea	0.692582
Ofav	Red	2	Red2	HS			Zooxarea	0.719139
Ofav	Red	2	Red2	HS			Zooxarea	0.637389
Ofav	Red	2	Red2	HS			Zooxarea	0.427135
Ofav	Red	2	Red2	HS			Zooxarea	0.609782
Ofav	Red	2	Red2	HS			Zooxarea	0.64229
Ofav	Red	2	Red2	HS			Zooxarea	0.494041
Ofav	Red	2	Red2	HS			Zooxarea	0.398583
Ofav	Red	2	Red2	HS			Zooxarea	0.519531
Ofav	Red	2	Red2	HS			Zooxarea	0.505012
Ofav	Red	2	Red2	HS			Zooxarea	0.5473
Ofav	Red	2	Red2	HS			Zooxarea	0.427122
Ofav	Red	2	Red2	HS			Zooxarea	0.701893
Ofav	Red	2	Red2	HS			Zooxarea	0.453588
Ofav	Red	2	Red2	HS			Zooxarea	0.608393
Ofav	Red	2	Red2	HS			Zooxarea	0.577406
Ofav	Red	2	Red2	HS			Zooxarea	0.69475
Ofav	Red	2	Red2	HS			Zooxarea	0.689522
Ofav	Red	2	Red2	HS			Zooxarea	0.669177
Ofav	Red	2	Red2	HS			Zooxarea	0.693354
Ofav	Red	2	Red2	HS			Zooxarea	0.603893
Ofav	Red	2	Red2	HS			Zooxarea	0.644517
Ofav	Red	2	Red2	HS			Zooxarea	0.630183
Ofav	Red	3	Red3	HS	1	12	Exopercent	0
Ofav	Red	3	Red3	HS	1		Gastrosep	NA
Ofav	Red	3	Red3	HS	2	10	Exopercent	0
Ofav	Red	3	Red3	HS	2		Gastrosep	0
Ofav	Red	3	Red3	HS	3	4	Exopercent	0
Ofav	Red	3	Red3	HS	3		Gastrosep	0
Ofav	Red	3	Red3	HS	4	8	Exopercent	0.130435
Ofav	Red	3	Red3	HS	4		Gastrosep	0
Ofav	Red	3	Red3	HS	5	4	Exopercent	0
Ofav	Red	3	Red3	HS	5		Gastrosep	0
Ofav	Red	3	Red3	HS	6	9	Exopercent	0.047619
Ofav	Red	3	Red3	HS	6		Gastrosep	23.264
Ofav	Red	3	Red3	HS	7	1	Exopercent	0.0909091
Ofav	Red	3	Red3	HS	7		Gastrosep	13.153
Ofav	Red	3	Red3	HS	8	10	Exopercent	0.1
Ofav	Red	3	Red3	HS	8		Gastrosep	17.761
Ofav	Red	3	Red3	HS	9	6	Exopercent	0
Ofav	Red	3	Red3	HS	9		Gastrosep	0
Ofav	Red	3	Red3	HS	10	12	Exopercent	0
Ofav	Red	3	Red3	HS	10		Gastrosep	0
Ofav	Red	3	Red3	HS			Zooxarea	0.586329
Ofav	Red	3	Red3	HS			Zooxarea	0.62291
Ofav	Red	3	Red3	HS			Zooxarea	0.519034
Ofav	Red	3	Red3	HS			Zooxarea	0.554579
Ofav	Red	3	Red3	HS			Zooxarea	0.50639
Ofav	Red	3	Red3	HS			Zooxarea	0.559386
Ofav	Red	3	Red3	HS			Zooxarea	0.56713
Ofav	Red	3	Red3	HS			Zooxarea	0.384333
Ofav	Red	3	Red3	HS			Zooxarea	0.172111
Ofav	Red	3	Red3	HS			Zooxarea	0.55344
Ofav	Red	3	Red3	HS			Zooxarea	0.40544
Ofav	Red	3	Red3	HS			Zooxarea	0.236595
Ofav	Red	3	Red3	HS			Zooxarea	0.486414
Ofav	Red	3	Red3	HS			Zooxarea	0.441954
Ofav	Red	3	Red3	HS			Zooxarea	0.657697
Ofav	Red	3	Red3	HS			Zooxarea	0.648247
Ofav	Red	3	Red3	HS			Zooxarea	0.730781
Ofav	Red	3	Red3	HS			Zooxarea	0.549744
Ofav	Red	3	Red3	HS			Zooxarea	0.404397
Ofav	Red	3	Red3	HS			Zooxarea	0.487883
Ofav	Red	3	Red3	HS			Zooxarea	0.596523
Ofav	Red	3	Red3	HS			Zooxarea	0.654874
Ofav	Red	3	Red3	HS			Zooxarea	0.705879
Ofav	Red	3	Red3	HS			Zooxarea	0.600892
Ofav	Red	3	Red3	HS			Zooxarea	0.639014
Ofav	Yellow	2	Yellow2	HS	1	8	Exopercent	0
Ofav	Yellow	2	Yellow2	HS	1		Gastrosep	11.811
Ofav	Yellow	2	Yellow2	HS	2	2	Exopercent	0
Ofav	Yellow	2	Yellow2	HS	2		Gastrosep	10.389
Ofav	Yellow	2	Yellow2	HS	3	8	Exopercent	0
Ofav	Yellow	2	Yellow2	HS	3		Gastrosep	0
Ofav	Yellow	2	Yellow2	HS	4	2	Exopercent	0
Ofav	Yellow	2	Yellow2	HS	4		Gastrosep	17.826
Ofav	Yellow	2	Yellow2	HS	5	10	Exopercent	0
Ofav	Yellow	2	Yellow2	HS	5		Gastrosep	0
Ofav	Yellow	2	Yellow2	HS	6	12	Exopercent	0
Ofav	Yellow	2	Yellow2	HS	6		Gastrosep	0
Ofav	Yellow	2	Yellow2	HS	7	5	Exopercent	0
Ofav	Yellow	2	Yellow2	HS	7		Gastrosep	0
Ofav	Yellow	2	Yellow2	HS	8	12	Exopercent	0
Ofav	Yellow	2	Yellow2	HS	8		Gastrosep	0
Ofav	Yellow	2	Yellow2	HS	9	3	Exopercent	0
Ofav	Yellow	2	Yellow2	HS	9		Gastrosep	0
Ofav	Yellow	2	Yellow2	HS	10	10	Exopercent	0.166667
Ofav	Yellow	2	Yellow2	HS	10		Gastrosep	0
Ofav	Yellow	2	Yellow2	HS			Zooxarea	0.494297
Ofav	Yellow	2	Yellow2	HS			Zooxarea	0.627067
Ofav	Yellow	2	Yellow2	HS			Zooxarea	0.623472
Ofav	Yellow	2	Yellow2	HS			Zooxarea	0.723056
Ofav	Yellow	2	Yellow2	HS			Zooxarea	0.556539
Ofav	Yellow	2	Yellow2	HS			Zooxarea	0.616375
Ofav	Yellow	2	Yellow2	HS			Zooxarea	0.72418
Ofav	Yellow	2	Yellow2	HS			Zooxarea	0.531043
Ofav	Yellow	2	Yellow2	HS			Zooxarea	0.606774
Ofav	Yellow	2	Yellow2	HS			Zooxarea	0.685901
Ofav	Yellow	2	Yellow2	HS			Zooxarea	0.462443
Ofav	Yellow	2	Yellow2	HS			Zooxarea	0.640451
Ofav	Yellow	2	Yellow2	HS			Zooxarea	0.756642
Ofav	Yellow	2	Yellow2	HS			Zooxarea	0.649668
Ofav	Yellow	2	Yellow2	HS			Zooxarea	0.753282
Ofav	Yellow	2	Yellow2	HS			Zooxarea	0.893649
Ofav	Yellow	2	Yellow2	HS			Zooxarea	0.518498
Ofav	Yellow	2	Yellow2	HS			Zooxarea	0.496134
Ofav	Yellow	2	Yellow2	HS			Zooxarea	0.58761
Ofav	Yellow	2	Yellow2	HS			Zooxarea	0.548721
Ofav	Yellow	2	Yellow2	HS			Zooxarea	0.430736
Ofav	Yellow	2	Yellow2	HS			Zooxarea	0.538388
Ofav	Yellow	2	Yellow2	HS			Zooxarea	0.596435
Ofav	Yellow	2	Yellow2	HS			Zooxarea	0.527519
Ofav	Yellow	2	Yellow2	HS			Zooxarea	0.395573
Mcav	Orange	1	Orange1	IDS	1	7	Exopercent	0
Mcav	Orange	1	Orange1	IDS	1		Gastrosep	40.992
Mcav	Orange	1	Orange1	IDS	2	7	Exopercent	0
Mcav	Orange	1	Orange1	IDS	2		Gastrosep	9.857
Mcav	Orange	1	Orange1	IDS	3	2	Exopercent	0
Mcav	Orange	1	Orange1	IDS	3		Gastrosep	38.735
Mcav	Orange	1	Orange1	IDS	4	5	Exopercent	0.5
Mcav	Orange	1	Orange1	IDS	4		Gastrosep	55.739
Mcav	Orange	1	Orange1	IDS	5	6	Exopercent	0
Mcav	Orange	1	Orange1	IDS	5		Gastrosep	23.031
Mcav	Orange	1	Orange1	IDS	6	7	Exopercent	0.142857
Mcav	Orange	1	Orange1	IDS	6		Gastrosep	56.82
Mcav	Orange	1	Orange1	IDS	7	2	Exopercent	0.142857
Mcav	Orange	1	Orange1	IDS	7		Gastrosep	0
Mcav	Orange	1	Orange1	IDS	8	11	Exopercent	0.2
Mcav	Orange	1	Orange1	IDS	8		Gastrosep	8.504
Mcav	Orange	1	Orange1	IDS	9	10	Exopercent	0
Mcav	Orange	1	Orange1	IDS	9		Gastrosep	0
Mcav	Orange	1	Orange1	IDS	10	10	Exopercent	0.222222
Mcav	Orange	1	Orange1	IDS	10		Gastrosep	0
Mcav	Orange	1	Orange1	IDS			Zooxarea	0.449721
Mcav	Orange	1	Orange1	IDS			Zooxarea	0.537506
Mcav	Orange	1	Orange1	IDS			Zooxarea	0.646312
Mcav	Orange	1	Orange1	IDS			Zooxarea	0.641499
Mcav	Orange	1	Orange1	IDS			Zooxarea	0.486452
Mcav	Orange	1	Orange1	IDS			Zooxarea	0.634758
Mcav	Orange	1	Orange1	IDS			Zooxarea	0.407592
Mcav	Orange	1	Orange1	IDS			Zooxarea	0.359084
Mcav	Orange	1	Orange1	IDS			Zooxarea	0.451559
Mcav	Orange	1	Orange1	IDS			Zooxarea	0.415721
Mcav	Orange	1	Orange1	IDS			Zooxarea	0.509763
Mcav	Orange	1	Orange1	IDS			Zooxarea	0.43448
Mcav	Orange	1	Orange1	IDS			Zooxarea	0.678559
Mcav	Orange	1	Orange1	IDS			Zooxarea	0.395774
Mcav	Orange	1	Orange1	IDS			Zooxarea	0.562751
Mcav	Orange	1	Orange1	IDS			Zooxarea	0.370506
Mcav	Orange	1	Orange1	IDS			Zooxarea	0.391033
Mcav	Orange	1	Orange1	IDS			Zooxarea	0.494411
Mcav	Orange	1	Orange1	IDS			Zooxarea	0.373641
Mcav	Orange	1	Orange1	IDS			Zooxarea	0.530111
Mcav	Orange	1	Orange1	IDS			Zooxarea	0.551224
Mcav	Orange	1	Orange1	IDS			Zooxarea	0.42213
Mcav	Orange	1	Orange1	IDS			Zooxarea	0.609899
Mcav	Orange	1	Orange1	IDS			Zooxarea	0.362628
Mcav	Orange	1	Orange1	IDS			Zooxarea	0.556068
Mcav	Red	1	Red1	IDS	1	7	Exopercent	0
Mcav	Red	1	Red1	IDS	1		Gastrosep	20.576
Mcav	Red	1	Red1	IDS	2	1	Exopercent	0
Mcav	Red	1	Red1	IDS	2		Gastrosep	34.174
Mcav	Red	1	Red1	IDS	3	9	Exopercent	0
Mcav	Red	1	Red1	IDS	3		Gastrosep	27.465
Mcav	Red	1	Red1	IDS	4	4	Exopercent	0.166667
Mcav	Red	1	Red1	IDS	4		Gastrosep	36.46
Mcav	Red	1	Red1	IDS	5	6	Exopercent	0
Mcav	Red	1	Red1	IDS	5		Gastrosep	0
Mcav	Red	1	Red1	IDS	6	11	Exopercent	0.210526
Mcav	Red	1	Red1	IDS	6		Gastrosep	47.093
Mcav	Red	1	Red1	IDS	7	12	Exopercent	0.07
Mcav	Red	1	Red1	IDS	7		Gastrosep	22.297
Mcav	Red	1	Red1	IDS	8	7	Exopercent	0
Mcav	Red	1	Red1	IDS	8		Gastrosep	0
Mcav	Red	1	Red1	IDS	9	9	Exopercent	0.25
Mcav	Red	1	Red1	IDS	9		Gastrosep	0
Mcav	Red	1	Red1	IDS	10	9	Exopercent	0.3
Mcav	Red	1	Red1	IDS	10		Gastrosep	0
Mcav	Red	1	Red1	IDS			Zooxarea	0.515476
Mcav	Red	1	Red1	IDS			Zooxarea	0.553617
Mcav	Red	1	Red1	IDS			Zooxarea	0.479087
Mcav	Red	1	Red1	IDS			Zooxarea	0.519713
Mcav	Red	1	Red1	IDS			Zooxarea	0.440039
Mcav	Red	1	Red1	IDS			Zooxarea	0.557027
Mcav	Red	1	Red1	IDS			Zooxarea	0.651947
Mcav	Red	1	Red1	IDS			Zooxarea	0.421416
Mcav	Red	1	Red1	IDS			Zooxarea	0.470728
Mcav	Red	1	Red1	IDS			Zooxarea	0.686475
Mcav	Red	1	Red1	IDS			Zooxarea	0.595508
Mcav	Red	1	Red1	IDS			Zooxarea	0.563327
Mcav	Red	1	Red1	IDS			Zooxarea	0.521049
Mcav	Red	1	Red1	IDS			Zooxarea	0.458614
Mcav	Red	1	Red1	IDS			Zooxarea	0.427683
Mcav	Red	1	Red1	IDS			Zooxarea	0.49671
Mcav	Red	1	Red1	IDS			Zooxarea	0.450967
Mcav	Red	1	Red1	IDS			Zooxarea	0.437584
Mcav	Red	1	Red1	IDS			Zooxarea	0.483275
Mcav	Red	1	Red1	IDS			Zooxarea	0.509011
Mcav	Red	1	Red1	IDS			Zooxarea	0.445761
Mcav	Red	1	Red1	IDS			Zooxarea	0.431565
Mcav	Red	1	Red1	IDS			Zooxarea	0.491908
Mcav	Red	1	Red1	IDS			Zooxarea	0.407055
Mcav	Red	1	Red1	IDS			Zooxarea	0.567057
Ofav	Orange	1	Orange1	IDS	1	7	Exopercent	0
Ofav	Orange	1	Orange1	IDS	1		Gastrosep	NA
Ofav	Orange	1	Orange1	IDS	2	3	Exopercent	0.05
Ofav	Orange	1	Orange1	IDS	2		Gastrosep	NA
Ofav	Orange	1	Orange1	IDS	3	10	Exopercent	0
Ofav	Orange	1	Orange1	IDS	3		Gastrosep	NA
Ofav	Orange	1	Orange1	IDS	4	10	Exopercent	0
Ofav	Orange	1	Orange1	IDS	4		Gastrosep	NA
Ofav	Orange	1	Orange1	IDS	5	7	Exopercent	0
Ofav	Orange	1	Orange1	IDS	5		Gastrosep	0
Ofav	Orange	1	Orange1	IDS	6	8	Exopercent	0
Ofav	Orange	1	Orange1	IDS	6		Gastrosep	0
Ofav	Orange	1	Orange1	IDS	7	2	Exopercent	0.2
Ofav	Orange	1	Orange1	IDS	7		Gastrosep	0
Ofav	Orange	1	Orange1	IDS	8	9	Exopercent	0.0526316
Ofav	Orange	1	Orange1	IDS	8		Gastrosep	25.615
Ofav	Orange	1	Orange1	IDS	9	1	Exopercent	0.8
Ofav	Orange	1	Orange1	IDS	9		Gastrosep	0
Ofav	Orange	1	Orange1	IDS	10	9	Exopercent	0
Ofav	Orange	1	Orange1	IDS	10		Gastrosep	NA
Ofav	Orange	1	Orange1	IDS			Zooxarea	0.481955
Ofav	Orange	1	Orange1	IDS			Zooxarea	0.577687
Ofav	Orange	1	Orange1	IDS			Zooxarea	0.44688
Ofav	Orange	1	Orange1	IDS			Zooxarea	0.438296
Ofav	Orange	1	Orange1	IDS			Zooxarea	0.442947
Ofav	Orange	1	Orange1	IDS			Zooxarea	0.526827
Ofav	Orange	1	Orange1	IDS			Zooxarea	0.429279
Ofav	Orange	1	Orange1	IDS			Zooxarea	0.453
Ofav	Orange	1	Orange1	IDS			Zooxarea	0.312439
Ofav	Orange	1	Orange1	IDS			Zooxarea	0.458189
Ofav	Orange	1	Orange1	IDS			Zooxarea	0.416039
Ofav	Orange	1	Orange1	IDS			Zooxarea	0.523777
Ofav	Orange	1	Orange1	IDS			Zooxarea	0.499179
Ofav	Orange	1	Orange1	IDS			Zooxarea	0.498494
Ofav	Orange	1	Orange1	IDS			Zooxarea	0.283379
Ofav	Orange	1	Orange1	IDS			Zooxarea	0.263685
Ofav	Orange	1	Orange1	IDS			Zooxarea	0.407199
Ofav	Orange	1	Orange1	IDS			Zooxarea	0.318229
Ofav	Orange	1	Orange1	IDS			Zooxarea	0.439482
Ofav	Orange	1	Orange1	IDS			Zooxarea	0.533285
Ofav	Orange	1	Orange1	IDS			Zooxarea	0.415511
Ofav	Orange	1	Orange1	IDS			Zooxarea	0.429324
Ofav	Orange	1	Orange1	IDS			Zooxarea	0.287507
Ofav	Orange	1	Orange1	IDS			Zooxarea	0.305931
Ofav	Orange	1	Orange1	IDS			Zooxarea	0.447415
Ofav	Orange	2	Orange2	IDS	1	10	Exopercent	0
Ofav	Orange	2	Orange2	IDS	1		Gastrosep	NA
Ofav	Orange	2	Orange2	IDS	2	10	Exopercent	0
Ofav	Orange	2	Orange2	IDS	2		Gastrosep	0
Ofav	Orange	2	Orange2	IDS	3	3	Exopercent	0
Ofav	Orange	2	Orange2	IDS	3		Gastrosep	13.891
Ofav	Orange	2	Orange2	IDS	4	10	Exopercent	0
Ofav	Orange	2	Orange2	IDS	4		Gastrosep	0
Ofav	Orange	2	Orange2	IDS	5	12	Exopercent	1
Ofav	Orange	2	Orange2	IDS	5		Gastrosep	NA
Ofav	Orange	2	Orange2	IDS	6	8	Exopercent	0.333333
Ofav	Orange	2	Orange2	IDS	6		Gastrosep	0
Ofav	Orange	2	Orange2	IDS	7	9	Exopercent	0.6
Ofav	Orange	2	Orange2	IDS	7		Gastrosep	24.187
Ofav	Orange	2	Orange2	IDS	8	6	Exopercent	0.166667
Ofav	Orange	2	Orange2	IDS	8		Gastrosep	16.77
Ofav	Orange	2	Orange2	IDS	9	3	Exopercent	0.181818
Ofav	Orange	2	Orange2	IDS	9		Gastrosep	31.27
Ofav	Orange	2	Orange2	IDS	10	7	Exopercent	0
Ofav	Orange	2	Orange2	IDS	10		Gastrosep	0
Ofav	Orange	2	Orange2	IDS			Zooxarea	0.557757
Ofav	Orange	2	Orange2	IDS			Zooxarea	0.526244
Ofav	Orange	2	Orange2	IDS			Zooxarea	0.507053
Ofav	Orange	2	Orange2	IDS			Zooxarea	0.578623
Ofav	Orange	2	Orange2	IDS			Zooxarea	0.457709
Ofav	Orange	2	Orange2	IDS			Zooxarea	0.593027
Ofav	Orange	2	Orange2	IDS			Zooxarea	0.531355
Ofav	Orange	2	Orange2	IDS			Zooxarea	0.402196
Ofav	Orange	2	Orange2	IDS			Zooxarea	0.459323
Ofav	Orange	2	Orange2	IDS			Zooxarea	0.402282
Ofav	Orange	2	Orange2	IDS			Zooxarea	0.36209
Ofav	Orange	2	Orange2	IDS			Zooxarea	0.568131
Ofav	Orange	2	Orange2	IDS			Zooxarea	0.563772
Ofav	Orange	2	Orange2	IDS			Zooxarea	0.42603
Ofav	Orange	2	Orange2	IDS			Zooxarea	0.419122
Ofav	Orange	2	Orange2	IDS			Zooxarea	0.404055
Ofav	Orange	2	Orange2	IDS			Zooxarea	0.547416
Ofav	Orange	2	Orange2	IDS			Zooxarea	0.354897
Ofav	Orange	2	Orange2	IDS			Zooxarea	0.531829
Ofav	Orange	2	Orange2	IDS			Zooxarea	0.316387
Ofav	Orange	2	Orange2	IDS			Zooxarea	0.386558
Ofav	Orange	2	Orange2	IDS			Zooxarea	0.32458
Ofav	Orange	2	Orange2	IDS			Zooxarea	0.417684
Ofav	Orange	2	Orange2	IDS			Zooxarea	0.583522
Ofav	Orange	2	Orange2	IDS			Zooxarea	0.41794
Ofav	Orange	3	Orange3	IDS	1	2	Exopercent	0
Ofav	Orange	3	Orange3	IDS	1		Gastrosep	28.151
Ofav	Orange	3	Orange3	IDS	2	12	Exopercent	0
Ofav	Orange	3	Orange3	IDS	2		Gastrosep	53.57
Ofav	Orange	3	Orange3	IDS	3	3	Exopercent	0
Ofav	Orange	3	Orange3	IDS	3		Gastrosep	49.209
Ofav	Orange	3	Orange3	IDS	4	7	Exopercent	0
Ofav	Orange	3	Orange3	IDS	4		Gastrosep	21.766
Ofav	Orange	3	Orange3	IDS	5	8	Exopercent	0.2
Ofav	Orange	3	Orange3	IDS	5		Gastrosep	32.937
Ofav	Orange	3	Orange3	IDS	6	12	Exopercent	0
Ofav	Orange	3	Orange3	IDS	6		Gastrosep	NA
Ofav	Orange	3	Orange3	IDS	7	1	Exopercent	0
Ofav	Orange	3	Orange3	IDS	7		Gastrosep	0
Ofav	Orange	3	Orange3	IDS	8	5	Exopercent	0
Ofav	Orange	3	Orange3	IDS	8		Gastrosep	0
Ofav	Orange	3	Orange3	IDS	9	4	Exopercent	0
Ofav	Orange	3	Orange3	IDS	9		Gastrosep	15.267
Ofav	Orange	3	Orange3	IDS	10	6	Exopercent	0.142857
Ofav	Orange	3	Orange3	IDS	10		Gastrosep	29.547
Ofav	Orange	3	Orange3	IDS			Zooxarea	0.353282
Ofav	Orange	3	Orange3	IDS			Zooxarea	0.480116
Ofav	Orange	3	Orange3	IDS			Zooxarea	0.463062
Ofav	Orange	3	Orange3	IDS			Zooxarea	0.587125
Ofav	Orange	3	Orange3	IDS			Zooxarea	0.595268
Ofav	Orange	3	Orange3	IDS			Zooxarea	0.324899
Ofav	Orange	3	Orange3	IDS			Zooxarea	0.502505
Ofav	Orange	3	Orange3	IDS			Zooxarea	0.459851
Ofav	Orange	3	Orange3	IDS			Zooxarea	0.407782
Ofav	Orange	3	Orange3	IDS			Zooxarea	0.620275
Ofav	Orange	3	Orange3	IDS			Zooxarea	0.596243
Ofav	Orange	3	Orange3	IDS			Zooxarea	0.466376
Ofav	Orange	3	Orange3	IDS			Zooxarea	0.490124
Ofav	Orange	3	Orange3	IDS			Zooxarea	0.553707
Ofav	Orange	3	Orange3	IDS			Zooxarea	0.455204
Ofav	Orange	3	Orange3	IDS			Zooxarea	0.46049
Ofav	Orange	3	Orange3	IDS			Zooxarea	0.391876
Ofav	Orange	3	Orange3	IDS			Zooxarea	0.481033
Ofav	Orange	3	Orange3	IDS			Zooxarea	0.437977
Ofav	Orange	3	Orange3	IDS			Zooxarea	0.47383
Ofav	Orange	3	Orange3	IDS			Zooxarea	0.440621
Ofav	Orange	3	Orange3	IDS			Zooxarea	0.566307
Ofav	Orange	3	Orange3	IDS			Zooxarea	0.580825
Ofav	Orange	3	Orange3	IDS			Zooxarea	0.438179
Ofav	Orange	3	Orange3	IDS			Zooxarea	0.434132
Ofav	Red	2	Red2	IDS	1	6	Exopercent	0
Ofav	Red	2	Red2	IDS	1		Gastrosep	0
Ofav	Yellow	2	Yellow2	IDS	1	6	Exopercent	0
Ofav	Yellow	2	Yellow2	IDS	1		Gastrosep	27.063
Ofav	Yellow	2	Yellow2	IDS	2	4	Exopercent	0
Ofav	Yellow	2	Yellow2	IDS	2		Gastrosep	15.196
Ofav	Yellow	2	Yellow2	IDS	3	12	Exopercent	0
Ofav	Yellow	2	Yellow2	IDS	3		Gastrosep	NA
Ofav	Yellow	2	Yellow2	IDS	4	8	Exopercent	0.0769231
Ofav	Yellow	2	Yellow2	IDS	4		Gastrosep	27.46
Ofav	Yellow	2	Yellow2	IDS	5	8	Exopercent	0.5
Ofav	Yellow	2	Yellow2	IDS	5		Gastrosep	0
Ofav	Yellow	2	Yellow2	IDS	6	7	Exopercent	0.25
Ofav	Yellow	2	Yellow2	IDS	6		Gastrosep	0
Ofav	Yellow	2	Yellow2	IDS	7	6	Exopercent	0.142857
Ofav	Yellow	2	Yellow2	IDS	7		Gastrosep	30.739
Ofav	Yellow	2	Yellow2	IDS	8	5	Exopercent	0
Ofav	Yellow	2	Yellow2	IDS	8		Gastrosep	0
Ofav	Yellow	2	Yellow2	IDS	9	11	Exopercent	0
Ofav	Yellow	2	Yellow2	IDS	9		Gastrosep	0
Ofav	Yellow	2	Yellow2	IDS	10	12	Exopercent	1
Ofav	Yellow	2	Yellow2	IDS	10		Gastrosep	NA
Ofav	Yellow	2	Yellow2	IDS			Zooxarea	0.473006
Ofav	Yellow	2	Yellow2	IDS			Zooxarea	0.497147
Ofav	Yellow	2	Yellow2	IDS			Zooxarea	0.38654
Ofav	Yellow	2	Yellow2	IDS			Zooxarea	0.544441
Ofav	Yellow	2	Yellow2	IDS			Zooxarea	0.600183
Ofav	Yellow	2	Yellow2	IDS			Zooxarea	0.566876
Ofav	Yellow	2	Yellow2	IDS			Zooxarea	0.540835
Ofav	Yellow	2	Yellow2	IDS			Zooxarea	0.696788
Ofav	Yellow	2	Yellow2	IDS			Zooxarea	0.505725
Ofav	Yellow	2	Yellow2	IDS			Zooxarea	0.574467
Ofav	Yellow	2	Yellow2	IDS			Zooxarea	0.654532
Ofav	Yellow	2	Yellow2	IDS			Zooxarea	0.519681
Ofav	Yellow	2	Yellow2	IDS			Zooxarea	0.541606
Ofav	Yellow	2	Yellow2	IDS			Zooxarea	0.376686
Ofav	Yellow	2	Yellow2	IDS			Zooxarea	0.608958
Ofav	Yellow	2	Yellow2	IDS			Zooxarea	0.507018
Ofav	Yellow	2	Yellow2	IDS			Zooxarea	0.251777
Ofav	Yellow	2	Yellow2	IDS			Zooxarea	0.531703
Ofav	Yellow	2	Yellow2	IDS			Zooxarea	0.546205
Ofav	Yellow	2	Yellow2	IDS			Zooxarea	0.478011
Ofav	Yellow	2	Yellow2	IDS			Zooxarea	0.496781
Ofav	Yellow	2	Yellow2	IDS			Zooxarea	0.656436
Ofav	Yellow	2	Yellow2	IDS			Zooxarea	0.495442
Ofav	Yellow	2	Yellow2	IDS			Zooxarea	0.33543
Ofav	Yellow	2	Yellow2	IDS			Zooxarea	0.467583
Ofav	Yellow	3	Yellow3	IDS	1	4	Exopercent	0
Ofav	Yellow	3	Yellow3	IDS	1		Gastrosep	14.782
Ofav	Yellow	3	Yellow3	IDS	2	3	Exopercent	0.2
Ofav	Yellow	3	Yellow3	IDS	2		Gastrosep	33.48
Ofav	Yellow	3	Yellow3	IDS	3	6	Exopercent	0
Ofav	Yellow	3	Yellow3	IDS	3		Gastrosep	0
Ofav	Yellow	3	Yellow3	IDS	4	11	Exopercent	0
Ofav	Yellow	3	Yellow3	IDS	4		Gastrosep	41.738
Ofav	Yellow	3	Yellow3	IDS	5	4	Exopercent	0
Ofav	Yellow	3	Yellow3	IDS	5		Gastrosep	0
Ofav	Yellow	3	Yellow3	IDS	6	12	Exopercent	0
Ofav	Yellow	3	Yellow3	IDS	6		Gastrosep	28.305
Ofav	Yellow	3	Yellow3	IDS	7	11	Exopercent	0
Ofav	Yellow	3	Yellow3	IDS	7		Gastrosep	0
Ofav	Yellow	3	Yellow3	IDS	8	3	Exopercent	1
Ofav	Yellow	3	Yellow3	IDS	8		Gastrosep	20.772
Ofav	Yellow	3	Yellow3	IDS	9	9	Exopercent	0
Ofav	Yellow	3	Yellow3	IDS	9		Gastrosep	12.532
Ofav	Yellow	3	Yellow3	IDS			Zooxarea	0.334644
Ofav	Yellow	3	Yellow3	IDS			Zooxarea	0.513937
Ofav	Yellow	3	Yellow3	IDS			Zooxarea	0.251476
Ofav	Yellow	3	Yellow3	IDS			Zooxarea	0.277763
Ofav	Yellow	3	Yellow3	IDS			Zooxarea	0.426977
Ofav	Yellow	3	Yellow3	IDS			Zooxarea	0.356932
Ofav	Yellow	3	Yellow3	IDS			Zooxarea	0.344538
Ofav	Yellow	3	Yellow3	IDS			Zooxarea	0.53551
Ofav	Yellow	3	Yellow3	IDS			Zooxarea	0.425437
Ofav	Yellow	3	Yellow3	IDS			Zooxarea	0.418522
Ofav	Yellow	3	Yellow3	IDS			Zooxarea	0.423102
Ofav	Yellow	3	Yellow3	IDS			Zooxarea	0.264461
Ofav	Yellow	3	Yellow3	IDS			Zooxarea	0.301349
Ofav	Yellow	3	Yellow3	IDS			Zooxarea	0.473483
Ofav	Yellow	3	Yellow3	IDS			Zooxarea	0.623196
Ofav	Yellow	3	Yellow3	IDS			Zooxarea	0.439121
Ofav	Yellow	3	Yellow3	IDS			Zooxarea	0.53431
Ofav	Yellow	3	Yellow3	IDS			Zooxarea	0.546211
Ofav	Yellow	3	Yellow3	IDS			Zooxarea	0.514056
Ofav	Yellow	3	Yellow3	IDS			Zooxarea	0.423332
Ofav	Yellow	3	Yellow3	IDS			Zooxarea	0.268423
Ofav	Yellow	3	Yellow3	IDS			Zooxarea	0.466769
Ofav	Yellow	3	Yellow3	IDS			Zooxarea	0.541347
Ofav	Yellow	3	Yellow3	IDS			Zooxarea	0.446347
Ofav	Yellow	3	Yellow3	IDS			Zooxarea	0.526808
Mcav	Orange	1	Orange1	BDS	1	1	Exopercent	0
Mcav	Orange	1	Orange1	BDS	1		Gastrosep	30.397
Mcav	Orange	1	Orange1	BDS	2	11	Exopercent	0
Mcav	Orange	1	Orange1	BDS	2		Gastrosep	26.946
Mcav	Orange	1	Orange1	BDS	3	8	Exopercent	0
Mcav	Orange	1	Orange1	BDS	3		Gastrosep	14.733
Mcav	Orange	1	Orange1	BDS	4	12	Exopercent	0
Mcav	Orange	1	Orange1	BDS	4		Gastrosep	32.253
Mcav	Orange	1	Orange1	BDS	5	5	Exopercent	0.125
Mcav	Orange	1	Orange1	BDS	5		Gastrosep	10.743
Mcav	Orange	1	Orange1	BDS	6	4	Exopercent	0.0909091
Mcav	Orange	1	Orange1	BDS	6		Gastrosep	23.384
Mcav	Orange	1	Orange1	BDS	7	1	Exopercent	0.166667
Mcav	Orange	1	Orange1	BDS	7		Gastrosep	10.277
Mcav	Orange	1	Orange1	BDS	8	2	Exopercent	0
Mcav	Orange	1	Orange1	BDS	8		Gastrosep	0
Mcav	Orange	1	Orange1	BDS	9	10	Exopercent	0
Mcav	Orange	1	Orange1	BDS	9		Gastrosep	0
Mcav	Orange	1	Orange1	BDS	10	9	Exopercent	0.428571
Mcav	Orange	1	Orange1	BDS	10		Gastrosep	23.296
Mcav	Orange	1	Orange1	BDS			Zooxarea	0.358569
Mcav	Orange	1	Orange1	BDS			Zooxarea	0.394565
Mcav	Orange	1	Orange1	BDS			Zooxarea	0.597205
Mcav	Orange	1	Orange1	BDS			Zooxarea	0.545142
Mcav	Orange	1	Orange1	BDS			Zooxarea	0.715945
Mcav	Orange	1	Orange1	BDS			Zooxarea	0.59383
Mcav	Orange	1	Orange1	BDS			Zooxarea	0.598411
Mcav	Orange	1	Orange1	BDS			Zooxarea	0.527732
Mcav	Orange	1	Orange1	BDS			Zooxarea	0.567018
Mcav	Orange	1	Orange1	BDS			Zooxarea	0.593939
Mcav	Orange	1	Orange1	BDS			Zooxarea	0.588025
Mcav	Orange	1	Orange1	BDS			Zooxarea	0.45254
Mcav	Orange	1	Orange1	BDS			Zooxarea	0.508811
Mcav	Orange	1	Orange1	BDS			Zooxarea	0.444964
Mcav	Orange	1	Orange1	BDS			Zooxarea	0.44162
Mcav	Orange	1	Orange1	BDS			Zooxarea	0.514661
Mcav	Orange	1	Orange1	BDS			Zooxarea	0.638475
Mcav	Orange	1	Orange1	BDS			Zooxarea	0.567636
Mcav	Orange	1	Orange1	BDS			Zooxarea	0.538251
Mcav	Orange	1	Orange1	BDS			Zooxarea	0.44499
Mcav	Orange	1	Orange1	BDS			Zooxarea	0.634066
Mcav	Orange	1	Orange1	BDS			Zooxarea	0.592931
Mcav	Orange	1	Orange1	BDS			Zooxarea	0.673672
Mcav	Orange	1	Orange1	BDS			Zooxarea	0.43502
Mcav	Orange	1	Orange1	BDS			Zooxarea	0.314811
Mcav	Orange	2	Orange2	BDS	1	6	Exopercent	0
Mcav	Orange	2	Orange2	BDS	1		Gastrosep	0
Mcav	Orange	2	Orange2	BDS	2	6	Exopercent	0
Mcav	Orange	2	Orange2	BDS	2		Gastrosep	21.303
Mcav	Orange	2	Orange2	BDS	3	8	Exopercent	0
Mcav	Orange	2	Orange2	BDS	3		Gastrosep	NA
Mcav	Orange	2	Orange2	BDS	4	9	Exopercent	0.3
Mcav	Orange	2	Orange2	BDS	4		Gastrosep	NA
Mcav	Orange	2	Orange2	BDS	5	1	Exopercent	0
Mcav	Orange	2	Orange2	BDS	5		Gastrosep	12.245
Mcav	Orange	2	Orange2	BDS	6	1	Exopercent	0
Mcav	Orange	2	Orange2	BDS	6		Gastrosep	0
Mcav	Orange	2	Orange2	BDS	7	6	Exopercent	0
Mcav	Orange	2	Orange2	BDS	7		Gastrosep	0
Mcav	Orange	2	Orange2	BDS	8	9	Exopercent	0
Mcav	Orange	2	Orange2	BDS	8		Gastrosep	0
Mcav	Orange	2	Orange2	BDS	9	10	Exopercent	0
Mcav	Orange	2	Orange2	BDS	9		Gastrosep	NA
Mcav	Orange	2	Orange2	BDS	10	3	Exopercent	0
Mcav	Orange	2	Orange2	BDS	10		Gastrosep	0
Mcav	Orange	2	Orange2	BDS			Zooxarea	0.356621
Mcav	Orange	2	Orange2	BDS			Zooxarea	0.579881
Mcav	Orange	2	Orange2	BDS			Zooxarea	0.509982
Mcav	Orange	2	Orange2	BDS			Zooxarea	0.605131
Mcav	Orange	2	Orange2	BDS			Zooxarea	0.545683
Mcav	Orange	2	Orange2	BDS			Zooxarea	0.574028
Mcav	Orange	2	Orange2	BDS			Zooxarea	0.496606
Mcav	Orange	2	Orange2	BDS			Zooxarea	0.441739
Mcav	Orange	2	Orange2	BDS			Zooxarea	0.375442
Mcav	Orange	2	Orange2	BDS			Zooxarea	0.591641
Mcav	Orange	2	Orange2	BDS			Zooxarea	0.71801
Mcav	Orange	2	Orange2	BDS			Zooxarea	0.465242
Mcav	Orange	2	Orange2	BDS			Zooxarea	0.566543
Mcav	Orange	2	Orange2	BDS			Zooxarea	0.426719
Mcav	Orange	2	Orange2	BDS			Zooxarea	0.685609
Mcav	Orange	2	Orange2	BDS			Zooxarea	0.561248
Mcav	Orange	2	Orange2	BDS			Zooxarea	0.466109
Mcav	Orange	2	Orange2	BDS			Zooxarea	0.618083
Mcav	Orange	2	Orange2	BDS			Zooxarea	0.394242
Mcav	Orange	2	Orange2	BDS			Zooxarea	0.588575
Mcav	Orange	2	Orange2	BDS			Zooxarea	0.627185
Mcav	Orange	2	Orange2	BDS			Zooxarea	0.529259
Mcav	Orange	2	Orange2	BDS			Zooxarea	0.548153
Mcav	Orange	2	Orange2	BDS			Zooxarea	0.486961
Mcav	Orange	2	Orange2	BDS			Zooxarea	0.452971
Mcav	Red	1	Red1	BDS	1	8	Exopercent	0
Mcav	Red	1	Red1	BDS	1		Gastrosep	23.876
Mcav	Red	1	Red1	BDS	2	10	Exopercent	0
Mcav	Red	1	Red1	BDS	2		Gastrosep	11.765
Mcav	Red	1	Red1	BDS	3	1	Exopercent	0
Mcav	Red	1	Red1	BDS	3		Gastrosep	0
Mcav	Red	1	Red1	BDS	4	7	Exopercent	0
Mcav	Red	1	Red1	BDS	4		Gastrosep	0
Mcav	Red	1	Red1	BDS	5	2	Exopercent	0
Mcav	Red	1	Red1	BDS	5		Gastrosep	40.161
Mcav	Red	1	Red1	BDS	6	7	Exopercent	0
Mcav	Red	1	Red1	BDS	6		Gastrosep	NA
Mcav	Red	1	Red1	BDS	7	10	Exopercent	0.272727
Mcav	Red	1	Red1	BDS	7		Gastrosep	NA
Mcav	Red	1	Red1	BDS	8	12	Exopercent	0
Mcav	Red	1	Red1	BDS	8		Gastrosep	NA
Mcav	Red	1	Red1	BDS	9	12	Exopercent	0
Mcav	Red	1	Red1	BDS	9		Gastrosep	21.067
Mcav	Red	1	Red1	BDS	10	5	Exopercent	0
Mcav	Red	1	Red1	BDS	10		Gastrosep	0
Mcav	Red	1	Red1	BDS			Zooxarea	0.427502
Mcav	Red	1	Red1	BDS			Zooxarea	0.356392
Mcav	Red	1	Red1	BDS			Zooxarea	0.48051
Mcav	Red	1	Red1	BDS			Zooxarea	0.589539
Mcav	Red	1	Red1	BDS			Zooxarea	0.47124
Mcav	Red	1	Red1	BDS			Zooxarea	0.594132
Mcav	Red	1	Red1	BDS			Zooxarea	0.503239
Mcav	Red	1	Red1	BDS			Zooxarea	0.655316
Mcav	Red	1	Red1	BDS			Zooxarea	0.438038
Mcav	Red	1	Red1	BDS			Zooxarea	0.496169
Mcav	Red	1	Red1	BDS			Zooxarea	0.34079
Mcav	Red	1	Red1	BDS			Zooxarea	0.246583
Mcav	Red	1	Red1	BDS			Zooxarea	0.58655
Mcav	Red	1	Red1	BDS			Zooxarea	0.292604
Mcav	Red	1	Red1	BDS			Zooxarea	0.509835
Mcav	Red	1	Red1	BDS			Zooxarea	0.524426
Mcav	Red	1	Red1	BDS			Zooxarea	0.51889
Mcav	Red	1	Red1	BDS			Zooxarea	0.61179
Mcav	Red	1	Red1	BDS			Zooxarea	0.38763
Mcav	Red	1	Red1	BDS			Zooxarea	0.729866
Mcav	Red	1	Red1	BDS			Zooxarea	0.599922
Mcav	Red	1	Red1	BDS			Zooxarea	0.609628
Mcav	Red	1	Red1	BDS			Zooxarea	0.663954
Mcav	Red	1	Red1	BDS			Zooxarea	0.515639
Mcav	Red	1	Red1	BDS			Zooxarea	0.498706
Mcav	Red	2	Red2	BDS	1	7	Exopercent	0
Mcav	Red	2	Red2	BDS	1		Gastrosep	12.778
Mcav	Red	2	Red2	BDS	2	7	Exopercent	0
Mcav	Red	2	Red2	BDS	2		Gastrosep	0
Mcav	Red	2	Red2	BDS	3	10	Exopercent	0
Mcav	Red	2	Red2	BDS	3		Gastrosep	11.127
Mcav	Red	2	Red2	BDS	4	11	Exopercent	0
Mcav	Red	2	Red2	BDS	4		Gastrosep	11.069
Mcav	Red	2	Red2	BDS	5	6	Exopercent	0.0833333
Mcav	Red	2	Red2	BDS	5		Gastrosep	0
Mcav	Red	2	Red2	BDS	6	10	Exopercent	0
Mcav	Red	2	Red2	BDS	6		Gastrosep	0
Mcav	Red	2	Red2	BDS	7	8	Exopercent	0.111111
Mcav	Red	2	Red2	BDS	7		Gastrosep	31.582
Mcav	Red	2	Red2	BDS	8	2	Exopercent	0
Mcav	Red	2	Red2	BDS	8		Gastrosep	0
Mcav	Red	2	Red2	BDS	9	11	Exopercent	0
Mcav	Red	2	Red2	BDS	9		Gastrosep	0
Mcav	Red	2	Red2	BDS	10	4	Exopercent	0.5
Mcav	Red	2	Red2	BDS	10		Gastrosep	0
Mcav	Red	2	Red2	BDS			Zooxarea	0.495939
Mcav	Red	2	Red2	BDS			Zooxarea	0.363949
Mcav	Red	2	Red2	BDS			Zooxarea	0.22047
Mcav	Red	2	Red2	BDS			Zooxarea	0.564082
Mcav	Red	2	Red2	BDS			Zooxarea	0.591813
Mcav	Red	2	Red2	BDS			Zooxarea	0.501052
Mcav	Red	2	Red2	BDS			Zooxarea	0.573576
Mcav	Red	2	Red2	BDS			Zooxarea	0.438096
Mcav	Red	2	Red2	BDS			Zooxarea	0.488499
Mcav	Red	2	Red2	BDS			Zooxarea	0.430214
Mcav	Red	2	Red2	BDS			Zooxarea	0.38364
Mcav	Red	2	Red2	BDS			Zooxarea	0.387295
Mcav	Red	2	Red2	BDS			Zooxarea	0.59684
Mcav	Red	2	Red2	BDS			Zooxarea	0.730372
Mcav	Red	2	Red2	BDS			Zooxarea	0.572342
Mcav	Red	2	Red2	BDS			Zooxarea	0.417779
Mcav	Red	2	Red2	BDS			Zooxarea	0.393601
Mcav	Red	2	Red2	BDS			Zooxarea	0.583253
Mcav	Red	2	Red2	BDS			Zooxarea	0.576501
Mcav	Red	2	Red2	BDS			Zooxarea	0.715271
Mcav	Red	2	Red2	BDS			Zooxarea	0.499125
Mcav	Red	2	Red2	BDS			Zooxarea	0.499251
Mcav	Red	2	Red2	BDS			Zooxarea	0.457828
Mcav	Red	2	Red2	BDS			Zooxarea	0.589255
Mcav	Red	2	Red2	BDS			Zooxarea	0.516426
Ofav	Orange	1	Orange1	BDS	1	2	Exopercent	0
Ofav	Orange	1	Orange1	BDS	1		Gastrosep	25.948
Ofav	Orange	1	Orange1	BDS	2	12	Exopercent	0
Ofav	Orange	1	Orange1	BDS	2		Gastrosep	0
Ofav	Orange	1	Orange1	BDS	3	7	Exopercent	0
Ofav	Orange	1	Orange1	BDS	3		Gastrosep	0
Ofav	Orange	1	Orange1	BDS	4	9	Exopercent	0
Ofav	Orange	1	Orange1	BDS	4		Gastrosep	30.069
Ofav	Orange	1	Orange1	BDS	5	2	Exopercent	0
Ofav	Orange	1	Orange1	BDS	5		Gastrosep	24.807
Ofav	Orange	1	Orange1	BDS	6	1	Exopercent	0.117647
Ofav	Orange	1	Orange1	BDS	6		Gastrosep	30.223
Ofav	Orange	1	Orange1	BDS	7	12	Exopercent	0
Ofav	Orange	1	Orange1	BDS	7		Gastrosep	0
Ofav	Orange	1	Orange1	BDS	8	3	Exopercent	0.454545
Ofav	Orange	1	Orange1	BDS	8		Gastrosep	0
Ofav	Orange	1	Orange1	BDS	9	2	Exopercent	0
Ofav	Orange	1	Orange1	BDS	9		Gastrosep	30.877
Ofav	Orange	1	Orange1	BDS	10	10	Exopercent	0.142857
Ofav	Orange	1	Orange1	BDS	10		Gastrosep	0
Ofav	Orange	1	Orange1	BDS			Zooxarea	0.487886
Ofav	Orange	1	Orange1	BDS			Zooxarea	0.59379
Ofav	Orange	1	Orange1	BDS			Zooxarea	0.529318
Ofav	Orange	1	Orange1	BDS			Zooxarea	0.635013
Ofav	Orange	1	Orange1	BDS			Zooxarea	0.286028
Ofav	Orange	1	Orange1	BDS			Zooxarea	0.498219
Ofav	Orange	1	Orange1	BDS			Zooxarea	0.546354
Ofav	Orange	1	Orange1	BDS			Zooxarea	0.38162
Ofav	Orange	1	Orange1	BDS			Zooxarea	0.427678
Ofav	Orange	1	Orange1	BDS			Zooxarea	0.29026
Ofav	Orange	1	Orange1	BDS			Zooxarea	0.537253
Ofav	Orange	1	Orange1	BDS			Zooxarea	0.485725
Ofav	Orange	1	Orange1	BDS			Zooxarea	0.701746
Ofav	Orange	1	Orange1	BDS			Zooxarea	0.529331
Ofav	Orange	1	Orange1	BDS			Zooxarea	0.746741
Ofav	Orange	1	Orange1	BDS			Zooxarea	0.587967
Ofav	Orange	1	Orange1	BDS			Zooxarea	0.576051
Ofav	Orange	1	Orange1	BDS			Zooxarea	0.565816
Ofav	Orange	1	Orange1	BDS			Zooxarea	0.392411
Ofav	Orange	1	Orange1	BDS			Zooxarea	0.518577
Ofav	Orange	1	Orange1	BDS			Zooxarea	0.620202
Ofav	Orange	1	Orange1	BDS			Zooxarea	0.50344
Ofav	Orange	1	Orange1	BDS			Zooxarea	0.352077
Ofav	Orange	1	Orange1	BDS			Zooxarea	0.595095
Ofav	Orange	1	Orange1	BDS			Zooxarea	0.455987
Ofav	Orange	2	Orange2	BDS	1	3	Exopercent	0.3
Ofav	Orange	2	Orange2	BDS	1		Gastrosep	NA
Ofav	Orange	2	Orange2	BDS	2	8	Exopercent	0
Ofav	Orange	2	Orange2	BDS	2		Gastrosep	27.055
Ofav	Orange	2	Orange2	BDS	3	4	Exopercent	0
Ofav	Orange	2	Orange2	BDS	3		Gastrosep	28.603
Ofav	Orange	2	Orange2	BDS	4	9	Exopercent	0
Ofav	Orange	2	Orange2	BDS	4		Gastrosep	26.652
Ofav	Orange	2	Orange2	BDS	5	6	Exopercent	0.0833333
Ofav	Orange	2	Orange2	BDS	5		Gastrosep	17.58
Ofav	Orange	2	Orange2	BDS	6	7	Exopercent	0
Ofav	Orange	2	Orange2	BDS	6		Gastrosep	0
Ofav	Orange	2	Orange2	BDS	7	10	Exopercent	0
Ofav	Orange	2	Orange2	BDS	7		Gastrosep	NA
Ofav	Orange	2	Orange2	BDS	8	3	Exopercent	0.166667
Ofav	Orange	2	Orange2	BDS	8		Gastrosep	NA
Ofav	Orange	2	Orange2	BDS	9	3	Exopercent	0
Ofav	Orange	2	Orange2	BDS	9		Gastrosep	26.604
Ofav	Orange	2	Orange2	BDS	10	9	Exopercent	0
Ofav	Orange	2	Orange2	BDS	10		Gastrosep	NA
Ofav	Orange	2	Orange2	BDS			Zooxarea	0.393782
Ofav	Orange	2	Orange2	BDS			Zooxarea	0.472871
Ofav	Orange	2	Orange2	BDS			Zooxarea	0.556758
Ofav	Orange	2	Orange2	BDS			Zooxarea	0.432347
Ofav	Orange	2	Orange2	BDS			Zooxarea	0.248544
Ofav	Orange	2	Orange2	BDS			Zooxarea	0.602968
Ofav	Orange	2	Orange2	BDS			Zooxarea	0.556427
Ofav	Orange	2	Orange2	BDS			Zooxarea	0.381166
Ofav	Orange	2	Orange2	BDS			Zooxarea	0.572484
Ofav	Orange	2	Orange2	BDS			Zooxarea	0.429254
Ofav	Orange	2	Orange2	BDS			Zooxarea	0.213132
Ofav	Orange	2	Orange2	BDS			Zooxarea	0.480735
Ofav	Orange	2	Orange2	BDS			Zooxarea	0.275258
Ofav	Orange	2	Orange2	BDS			Zooxarea	0.580559
Ofav	Orange	2	Orange2	BDS			Zooxarea	0.462151
Ofav	Orange	2	Orange2	BDS			Zooxarea	0.389939
Ofav	Orange	2	Orange2	BDS			Zooxarea	0.367568
Ofav	Orange	2	Orange2	BDS			Zooxarea	0.637903
Ofav	Orange	2	Orange2	BDS			Zooxarea	0.627382
Ofav	Orange	2	Orange2	BDS			Zooxarea	0.252753
Ofav	Orange	2	Orange2	BDS			Zooxarea	0.482247
Ofav	Orange	2	Orange2	BDS			Zooxarea	0.463378
Ofav	Orange	2	Orange2	BDS			Zooxarea	0.368607
Ofav	Orange	2	Orange2	BDS			Zooxarea	0.480214
Ofav	Orange	2	Orange2	BDS			Zooxarea	0.315566
Ofav	Orange	3	Orange3	BDS	1	8	Exopercent	0
Ofav	Orange	3	Orange3	BDS	1		Gastrosep	15.791
Ofav	Orange	3	Orange3	BDS	2	3	Exopercent	0
Ofav	Orange	3	Orange3	BDS	2		Gastrosep	23.698
Ofav	Orange	3	Orange3	BDS	3	11	Exopercent	0
Ofav	Orange	3	Orange3	BDS	3		Gastrosep	15.752
Ofav	Orange	3	Orange3	BDS	4	3	Exopercent	0
Ofav	Orange	3	Orange3	BDS	4		Gastrosep	NA
Ofav	Orange	3	Orange3	BDS	5	10	Exopercent	0.117647
Ofav	Orange	3	Orange3	BDS	5		Gastrosep	0
Ofav	Orange	3	Orange3	BDS	6	5	Exopercent	0.166667
Ofav	Orange	3	Orange3	BDS	6		Gastrosep	21.976
Ofav	Orange	3	Orange3	BDS	7	9	Exopercent	0
Ofav	Orange	3	Orange3	BDS	7		Gastrosep	0
Ofav	Orange	3	Orange3	BDS	8	7	Exopercent	0
Ofav	Orange	3	Orange3	BDS	8		Gastrosep	32.23
Ofav	Orange	3	Orange3	BDS	9	4	Exopercent	0.181818
Ofav	Orange	3	Orange3	BDS	9		Gastrosep	0
Ofav	Orange	3	Orange3	BDS	10	12	Exopercent	0.4
Ofav	Orange	3	Orange3	BDS	10		Gastrosep	NA
Ofav	Orange	3	Orange3	BDS			Zooxarea	0.559114
Ofav	Orange	3	Orange3	BDS			Zooxarea	0.652343
Ofav	Orange	3	Orange3	BDS			Zooxarea	0.479443
Ofav	Orange	3	Orange3	BDS			Zooxarea	0.750652
Ofav	Orange	3	Orange3	BDS			Zooxarea	0.622246
Ofav	Orange	3	Orange3	BDS			Zooxarea	0.532448
Ofav	Orange	3	Orange3	BDS			Zooxarea	0.692579
Ofav	Orange	3	Orange3	BDS			Zooxarea	0.449964
Ofav	Orange	3	Orange3	BDS			Zooxarea	0.372657
Ofav	Orange	3	Orange3	BDS			Zooxarea	0.425125
Ofav	Orange	3	Orange3	BDS			Zooxarea	0.632329
Ofav	Orange	3	Orange3	BDS			Zooxarea	0.386269
Ofav	Orange	3	Orange3	BDS			Zooxarea	0.498393
Ofav	Orange	3	Orange3	BDS			Zooxarea	0.483024
Ofav	Orange	3	Orange3	BDS			Zooxarea	0.494515
Ofav	Orange	3	Orange3	BDS			Zooxarea	0.503264
Ofav	Orange	3	Orange3	BDS			Zooxarea	0.481061
Ofav	Orange	3	Orange3	BDS			Zooxarea	0.443854
Ofav	Orange	3	Orange3	BDS			Zooxarea	0.651335
Ofav	Orange	3	Orange3	BDS			Zooxarea	0.677294
Ofav	Orange	3	Orange3	BDS			Zooxarea	0.551541
Ofav	Orange	3	Orange3	BDS			Zooxarea	0.523343
Ofav	Orange	3	Orange3	BDS			Zooxarea	0.535258
Ofav	Orange	3	Orange3	BDS			Zooxarea	0.588622
Ofav	Orange	3	Orange3	BDS			Zooxarea	0.430285
Ofav	Red	1	Red1	BDS	1	7	Exopercent	0
Ofav	Red	1	Red1	BDS	1		Gastrosep	0
Ofav	Red	1	Red1	BDS	2	10	Exopercent	0
Ofav	Red	1	Red1	BDS	2		Gastrosep	0
Ofav	Red	1	Red1	BDS	3	3	Exopercent	0.0714286
Ofav	Red	1	Red1	BDS	3		Gastrosep	NA
Ofav	Red	1	Red1	BDS	4	10	Exopercent	0
Ofav	Red	1	Red1	BDS	4		Gastrosep	0
Ofav	Red	1	Red1	BDS	5	9	Exopercent	0
Ofav	Red	1	Red1	BDS	5		Gastrosep	0
Ofav	Red	1	Red1	BDS	6	10	Exopercent	0.3
Ofav	Red	1	Red1	BDS	6		Gastrosep	0
Ofav	Red	1	Red1	BDS	7	1	Exopercent	0
Ofav	Red	1	Red1	BDS	7		Gastrosep	25.842
Ofav	Red	1	Red1	BDS	8	10	Exopercent	0
Ofav	Red	1	Red1	BDS	8		Gastrosep	9.647
Ofav	Red	1	Red1	BDS	9	3	Exopercent	0.0769231
Ofav	Red	1	Red1	BDS	9		Gastrosep	24.706
Ofav	Red	1	Red1	BDS	10	3	Exopercent	0
Ofav	Red	1	Red1	BDS	10		Gastrosep	21.621
Ofav	Red	1	Red1	BDS			Zooxarea	0.252139
Ofav	Red	1	Red1	BDS			Zooxarea	0.365654
Ofav	Red	1	Red1	BDS			Zooxarea	0.504762
Ofav	Red	1	Red1	BDS			Zooxarea	0.375642
Ofav	Red	1	Red1	BDS			Zooxarea	0.531225
Ofav	Red	1	Red1	BDS			Zooxarea	0.357849
Ofav	Red	1	Red1	BDS			Zooxarea	0.504677
Ofav	Red	1	Red1	BDS			Zooxarea	0.525951
Ofav	Red	1	Red1	BDS			Zooxarea	0.285886
Ofav	Red	1	Red1	BDS			Zooxarea	0.419057
Ofav	Red	1	Red1	BDS			Zooxarea	0.403563
Ofav	Red	1	Red1	BDS			Zooxarea	0.474993
Ofav	Red	1	Red1	BDS			Zooxarea	0.380461
Ofav	Red	1	Red1	BDS			Zooxarea	0.497459
Ofav	Red	1	Red1	BDS			Zooxarea	0.468899
Ofav	Red	1	Red1	BDS			Zooxarea	0.560499
Ofav	Red	1	Red1	BDS			Zooxarea	0.459536
Ofav	Red	1	Red1	BDS			Zooxarea	0.503891
Ofav	Red	1	Red1	BDS			Zooxarea	0.512305
Ofav	Red	1	Red1	BDS			Zooxarea	0.403934
Ofav	Red	1	Red1	BDS			Zooxarea	0.4409
Ofav	Red	1	Red1	BDS			Zooxarea	0.533253
Ofav	Red	1	Red1	BDS			Zooxarea	0.589515
Ofav	Red	1	Red1	BDS			Zooxarea	0.586042
Ofav	Red	1	Red1	BDS			Zooxarea	0.450388
Ofav	Red	2	Red2	BDS	1	3	Exopercent	0
Ofav	Red	2	Red2	BDS	1		Gastrosep	29.514
Ofav	Red	2	Red2	BDS	2	8	Exopercent	0
Ofav	Red	2	Red2	BDS	2		Gastrosep	19.514
Ofav	Red	2	Red2	BDS	3	11	Exopercent	0.130435
Ofav	Red	2	Red2	BDS	3		Gastrosep	14.182
Ofav	Red	2	Red2	BDS	4	12	Exopercent	0
Ofav	Red	2	Red2	BDS	4		Gastrosep	0
Ofav	Red	2	Red2	BDS	5	3	Exopercent	0.1
Ofav	Red	2	Red2	BDS	5		Gastrosep	0
Ofav	Red	2	Red2	BDS	6	8	Exopercent	0
Ofav	Red	2	Red2	BDS	6		Gastrosep	0
Ofav	Red	2	Red2	BDS	7	8	Exopercent	0
Ofav	Red	2	Red2	BDS	7		Gastrosep	0
Ofav	Red	2	Red2	BDS	8	7	Exopercent	0
Ofav	Red	2	Red2	BDS	8		Gastrosep	44.502
Ofav	Red	2	Red2	BDS	9	5	Exopercent	0
Ofav	Red	2	Red2	BDS	9		Gastrosep	40.577
Ofav	Red	2	Red2	BDS	10	4	Exopercent	0
Ofav	Red	2	Red2	BDS	10		Gastrosep	16.45
Ofav	Red	2	Red2	BDS			Zooxarea	0.549391
Ofav	Red	2	Red2	BDS			Zooxarea	0.654641
Ofav	Red	2	Red2	BDS			Zooxarea	0.613846
Ofav	Red	2	Red2	BDS			Zooxarea	0.413319
Ofav	Red	2	Red2	BDS			Zooxarea	0.56063
Ofav	Red	2	Red2	BDS			Zooxarea	0.449132
Ofav	Red	2	Red2	BDS			Zooxarea	0.324058
Ofav	Red	2	Red2	BDS			Zooxarea	0.582224
Ofav	Red	2	Red2	BDS			Zooxarea	0.571349
Ofav	Red	2	Red2	BDS			Zooxarea	0.470822
Ofav	Red	2	Red2	BDS			Zooxarea	0.568381
Ofav	Red	2	Red2	BDS			Zooxarea	0.486554
Ofav	Red	2	Red2	BDS			Zooxarea	0.679268
Ofav	Red	2	Red2	BDS			Zooxarea	0.506166
Ofav	Red	2	Red2	BDS			Zooxarea	0.615231
Ofav	Red	2	Red2	BDS			Zooxarea	0.573818
Ofav	Red	2	Red2	BDS			Zooxarea	0.526017
Ofav	Red	2	Red2	BDS			Zooxarea	0.524904
Ofav	Red	2	Red2	BDS			Zooxarea	0.433359
Ofav	Red	2	Red2	BDS			Zooxarea	0.569168
Ofav	Red	2	Red2	BDS			Zooxarea	0.619995
Ofav	Red	2	Red2	BDS			Zooxarea	0.617129
Ofav	Red	2	Red2	BDS			Zooxarea	0.624934
Ofav	Red	2	Red2	BDS			Zooxarea	0.481731
Ofav	Red	2	Red2	BDS			Zooxarea	0.299895
Ofav	Red	3	Red3	BDS	1	2	Exopercent	0.5
Ofav	Red	3	Red3	BDS	1		Gastrosep	25.146
Ofav	Red	3	Red3	BDS	2	3	Exopercent	0
Ofav	Red	3	Red3	BDS	2		Gastrosep	0
Ofav	Red	3	Red3	BDS	3	12	Exopercent	0.2
Ofav	Red	3	Red3	BDS	3		Gastrosep	38.212
Ofav	Red	3	Red3	BDS	4	3	Exopercent	0
Ofav	Red	3	Red3	BDS	4		Gastrosep	31.254
Ofav	Red	3	Red3	BDS	5	2	Exopercent	0.0666667
Ofav	Red	3	Red3	BDS	5		Gastrosep	12.85
Ofav	Red	3	Red3	BDS	6	4	Exopercent	0.333333
Ofav	Red	3	Red3	BDS	6		Gastrosep	0
Ofav	Red	3	Red3	BDS	7	9	Exopercent	0
Ofav	Red	3	Red3	BDS	7		Gastrosep	12.664
Ofav	Red	3	Red3	BDS	8	9	Exopercent	0
Ofav	Red	3	Red3	BDS	8		Gastrosep	15.595
Ofav	Red	3	Red3	BDS	9	10	Exopercent	0.1
Ofav	Red	3	Red3	BDS	9		Gastrosep	NA
Ofav	Red	3	Red3	BDS	10	7	Exopercent	0.1
Ofav	Red	3	Red3	BDS	10		Gastrosep	NA
Ofav	Red	3	Red3	BDS			Zooxarea	0.510505
Ofav	Red	3	Red3	BDS			Zooxarea	0.686819
Ofav	Red	3	Red3	BDS			Zooxarea	0.274879
Ofav	Red	3	Red3	BDS			Zooxarea	0.445867
Ofav	Red	3	Red3	BDS			Zooxarea	0.626689
Ofav	Red	3	Red3	BDS			Zooxarea	0.482346
Ofav	Red	3	Red3	BDS			Zooxarea	0.187576
Ofav	Red	3	Red3	BDS			Zooxarea	0.390249
Ofav	Red	3	Red3	BDS			Zooxarea	0.616598
Ofav	Red	3	Red3	BDS			Zooxarea	0.641663
Ofav	Red	3	Red3	BDS			Zooxarea	0.648628
Ofav	Red	3	Red3	BDS			Zooxarea	0.251588
Ofav	Red	3	Red3	BDS			Zooxarea	0.663108
Ofav	Red	3	Red3	BDS			Zooxarea	0.706
Ofav	Red	3	Red3	BDS			Zooxarea	0.580137
Ofav	Red	3	Red3	BDS			Zooxarea	0.296849
Ofav	Red	3	Red3	BDS			Zooxarea	0.656136
Ofav	Red	3	Red3	BDS			Zooxarea	0.522633
Ofav	Red	3	Red3	BDS			Zooxarea	0.335025
Ofav	Red	3	Red3	BDS			Zooxarea	0.566619
Ofav	Red	3	Red3	BDS			Zooxarea	0.612699
Ofav	Red	3	Red3	BDS			Zooxarea	0.575158
Ofav	Red	3	Red3	BDS			Zooxarea	0.535983
Ofav	Red	3	Red3	BDS			Zooxarea	0.548237
Ofav	Red	3	Red3	BDS			Zooxarea	0.514848
Ofav	Yellow	1	Yellow1	BDS	1	5	Exopercent	0
Ofav	Yellow	1	Yellow1	BDS	1		Gastrosep	33.389
Ofav	Yellow	1	Yellow1	BDS	2	11	Exopercent	0.0666667
Ofav	Yellow	1	Yellow1	BDS	2		Gastrosep	38.632
Ofav	Yellow	1	Yellow1	BDS	3	5	Exopercent	0
Ofav	Yellow	1	Yellow1	BDS	3		Gastrosep	16.505
Ofav	Yellow	1	Yellow1	BDS	4	6	Exopercent	0.142857
Ofav	Yellow	1	Yellow1	BDS	4		Gastrosep	28.67
Ofav	Yellow	1	Yellow1	BDS	5	8	Exopercent	0
Ofav	Yellow	1	Yellow1	BDS	5		Gastrosep	12.654
Ofav	Yellow	1	Yellow1	BDS	6	8	Exopercent	1
Ofav	Yellow	1	Yellow1	BDS	6		Gastrosep	28.91
Ofav	Yellow	1	Yellow1	BDS	7	8	Exopercent	0.25
Ofav	Yellow	1	Yellow1	BDS	7		Gastrosep	23.899
Ofav	Yellow	1	Yellow1	BDS	8	4	Exopercent	0.857143
Ofav	Yellow	1	Yellow1	BDS	8		Gastrosep	30.454
Ofav	Yellow	1	Yellow1	BDS	9	7	Exopercent	0.3
Ofav	Yellow	1	Yellow1	BDS	9		Gastrosep	39.715
Ofav	Yellow	1	Yellow1	BDS	10	8	Exopercent	0
Ofav	Yellow	1	Yellow1	BDS	10		Gastrosep	25.137
Ofav	Yellow	1	Yellow1	BDS			Zooxarea	0.455702
Ofav	Yellow	1	Yellow1	BDS			Zooxarea	0.539365
Ofav	Yellow	1	Yellow1	BDS			Zooxarea	0.657381
Ofav	Yellow	1	Yellow1	BDS			Zooxarea	0.670713
Ofav	Yellow	1	Yellow1	BDS			Zooxarea	0.495074
Ofav	Yellow	1	Yellow1	BDS			Zooxarea	0.331994
Ofav	Yellow	1	Yellow1	BDS			Zooxarea	0.573281
Ofav	Yellow	1	Yellow1	BDS			Zooxarea	0.584161
Ofav	Yellow	1	Yellow1	BDS			Zooxarea	0.591472
Ofav	Yellow	1	Yellow1	BDS			Zooxarea	0.508888
Ofav	Yellow	1	Yellow1	BDS			Zooxarea	0.592119
Ofav	Yellow	1	Yellow1	BDS			Zooxarea	0.55079
Ofav	Yellow	1	Yellow1	BDS			Zooxarea	0.423419
Ofav	Yellow	1	Yellow1	BDS			Zooxarea	0.729247
Ofav	Yellow	1	Yellow1	BDS			Zooxarea	0.520554
Ofav	Yellow	1	Yellow1	BDS			Zooxarea	0.586784
Ofav	Yellow	1	Yellow1	BDS			Zooxarea	0.518147
Ofav	Yellow	1	Yellow1	BDS			Zooxarea	0.402826
Ofav	Yellow	1	Yellow1	BDS			Zooxarea	0.570981
Ofav	Yellow	1	Yellow1	BDS			Zooxarea	0.438587
Ofav	Yellow	1	Yellow1	BDS			Zooxarea	0.539402
Ofav	Yellow	1	Yellow1	BDS			Zooxarea	0.390539
Ofav	Yellow	1	Yellow1	BDS			Zooxarea	0.453886
Ofav	Yellow	1	Yellow1	BDS			Zooxarea	0.512728
Ofav	Yellow	1	Yellow1	BDS			Zooxarea	0.603196
Ofav	Yellow	3	Yellow3	BDS	1	12	Exopercent	0
Ofav	Yellow	3	Yellow3	BDS	1		Gastrosep	0
Ofav	Yellow	3	Yellow3	BDS	2	2	Exopercent	0
Ofav	Yellow	3	Yellow3	BDS	2		Gastrosep	17.417
Ofav	Yellow	3	Yellow3	BDS	3	3	Exopercent	0.0833333
Ofav	Yellow	3	Yellow3	BDS	3		Gastrosep	0
Ofav	Yellow	3	Yellow3	BDS	4	12	Exopercent	0
Ofav	Yellow	3	Yellow3	BDS	4		Gastrosep	13.25
Ofav	Yellow	3	Yellow3	BDS	5	8	Exopercent	0.285714
Ofav	Yellow	3	Yellow3	BDS	5		Gastrosep	32.977
Ofav	Yellow	3	Yellow3	BDS	6	10	Exopercent	0.2
Ofav	Yellow	3	Yellow3	BDS	6		Gastrosep	NA
Ofav	Yellow	3	Yellow3	BDS	7	9	Exopercent	0
Ofav	Yellow	3	Yellow3	BDS	7		Gastrosep	31.788
Ofav	Yellow	3	Yellow3	BDS	8	4	Exopercent	0.166667
Ofav	Yellow	3	Yellow3	BDS	8		Gastrosep	27.311
Ofav	Yellow	3	Yellow3	BDS	9	3	Exopercent	0
Ofav	Yellow	3	Yellow3	BDS	9		Gastrosep	43.069
Ofav	Yellow	3	Yellow3	BDS	10	8	Exopercent	0.5
Ofav	Yellow	3	Yellow3	BDS	10		Gastrosep	15.611
Ofav	Yellow	3	Yellow3	BDS			Zooxarea	0.451931
Ofav	Yellow	3	Yellow3	BDS			Zooxarea	0.448392
Ofav	Yellow	3	Yellow3	BDS			Zooxarea	0.490176
Ofav	Yellow	3	Yellow3	BDS			Zooxarea	0.457968
Ofav	Yellow	3	Yellow3	BDS			Zooxarea	0.551156
Ofav	Yellow	3	Yellow3	BDS			Zooxarea	0.287858
Ofav	Yellow	3	Yellow3	BDS			Zooxarea	0.284197
Ofav	Yellow	3	Yellow3	BDS			Zooxarea	0.580332
Ofav	Yellow	3	Yellow3	BDS			Zooxarea	0.452503
Ofav	Yellow	3	Yellow3	BDS			Zooxarea	0.276953
Ofav	Yellow	3	Yellow3	BDS			Zooxarea	0.550733
Ofav	Yellow	3	Yellow3	BDS			Zooxarea	0.625247
Ofav	Yellow	3	Yellow3	BDS			Zooxarea	0.567711
Ofav	Yellow	3	Yellow3	BDS			Zooxarea	0.62067
Ofav	Yellow	3	Yellow3	BDS			Zooxarea	0.433263
Ofav	Yellow	3	Yellow3	BDS			Zooxarea	0.470772
Ofav	Yellow	3	Yellow3	BDS			Zooxarea	0.525118
Ofav	Yellow	3	Yellow3	BDS			Zooxarea	0.53007
Ofav	Yellow	3	Yellow3	BDS			Zooxarea	0.588903
Ofav	Yellow	3	Yellow3	BDS			Zooxarea	0.468079
Ofav	Yellow	3	Yellow3	BDS			Zooxarea	0.441128
Ofav	Yellow	3	Yellow3	BDS			Zooxarea	0.588973
Ofav	Yellow	3	Yellow3	BDS			Zooxarea	0.43891
Ofav	Yellow	3	Yellow3	BDS			Zooxarea	0.559438
Ofav	Yellow	3	Yellow3	BDS			Zooxarea	0.632445
Mcav	Orange	2	Orange2	IDS	1	12	Exopercent	0
Mcav	Orange	2	Orange2	IDS	1		Gastrosep	5.062
Mcav	Orange	2	Orange2	IDS	2	2	Exopercent	0
Mcav	Orange	2	Orange2	IDS	2		Gastrosep	0
Mcav	Orange	2	Orange2	IDS	3	6	Exopercent	0
Mcav	Orange	2	Orange2	IDS	3		Gastrosep	22.388
Mcav	Orange	2	Orange2	IDS	4	2	Exopercent	0
Mcav	Orange	2	Orange2	IDS	4		Gastrosep	0
Mcav	Orange	2	Orange2	IDS	5	7	Exopercent	0
Mcav	Orange	2	Orange2	IDS	5		Gastrosep	0
Mcav	Orange	2	Orange2	IDS	6	9	Exopercent	0.25
Mcav	Orange	2	Orange2	IDS	6		Gastrosep	0
Mcav	Orange	2	Orange2	IDS	7	4	Exopercent	0.25
Mcav	Orange	2	Orange2	IDS	7		Gastrosep	0
Mcav	Orange	2	Orange2	IDS	8	1	Exopercent	0
Mcav	Orange	2	Orange2	IDS	8		Gastrosep	0
Mcav	Orange	2	Orange2	IDS	9	10	Exopercent	0
Mcav	Orange	2	Orange2	IDS	9		Gastrosep	23.085
Mcav	Orange	2	Orange2	IDS	10	6	Exopercent	0.142857
Mcav	Orange	2	Orange2	IDS	10		Gastrosep	0
Mcav	Orange	2	Orange2	IDS			Zooxarea	0.527867
Mcav	Orange	2	Orange2	IDS			Zooxarea	0.693432
Mcav	Orange	2	Orange2	IDS			Zooxarea	0.493414
Mcav	Orange	2	Orange2	IDS			Zooxarea	0.705533
Mcav	Orange	2	Orange2	IDS			Zooxarea	0.63456
Mcav	Orange	2	Orange2	IDS			Zooxarea	0.487079
Mcav	Orange	2	Orange2	IDS			Zooxarea	0.571957
Mcav	Orange	2	Orange2	IDS			Zooxarea	0.612143
Mcav	Orange	2	Orange2	IDS			Zooxarea	0.703028
Mcav	Orange	2	Orange2	IDS			Zooxarea	0.586308
Mcav	Orange	2	Orange2	IDS			Zooxarea	0.394482
Mcav	Orange	2	Orange2	IDS			Zooxarea	0.512005
Mcav	Orange	2	Orange2	IDS			Zooxarea	0.559598
Mcav	Orange	2	Orange2	IDS			Zooxarea	0.772716
Mcav	Orange	2	Orange2	IDS			Zooxarea	0.730699
Mcav	Orange	2	Orange2	IDS			Zooxarea	0.547103
Mcav	Orange	2	Orange2	IDS			Zooxarea	0.574678
Mcav	Orange	2	Orange2	IDS			Zooxarea	0.49146
Mcav	Orange	2	Orange2	IDS			Zooxarea	0.564368
Mcav	Orange	2	Orange2	IDS			Zooxarea	0.409925
Mcav	Orange	2	Orange2	IDS			Zooxarea	0.560067
Mcav	Orange	2	Orange2	IDS			Zooxarea	0.532527
Mcav	Orange	2	Orange2	IDS			Zooxarea	0.624818
Mcav	Orange	2	Orange2	IDS			Zooxarea	0.595208
Mcav	Orange	2	Orange2	IDS			Zooxarea	0.624289
Mcav	Orange	3	Orange3	IDS	1	2	Exopercent	0
Mcav	Orange	3	Orange3	IDS	1		Gastrosep	11.565
Mcav	Orange	3	Orange3	IDS	2	9	Exopercent	0.285714
Mcav	Orange	3	Orange3	IDS	2		Gastrosep	38.737
Mcav	Orange	3	Orange3	IDS	3	3	Exopercent	0
Mcav	Orange	3	Orange3	IDS	3		Gastrosep	0
Mcav	Orange	3	Orange3	IDS	4	7	Exopercent	0.210526
Mcav	Orange	3	Orange3	IDS	4		Gastrosep	0
Mcav	Orange	3	Orange3	IDS	5	5	Exopercent	0.166667
Mcav	Orange	3	Orange3	IDS	5		Gastrosep	0
Mcav	Orange	3	Orange3	IDS	6	10	Exopercent	0.2
Mcav	Orange	3	Orange3	IDS	6		Gastrosep	26.274
Mcav	Orange	3	Orange3	IDS	7	11	Exopercent	0
Mcav	Orange	3	Orange3	IDS	7		Gastrosep	0
Mcav	Orange	3	Orange3	IDS	8	4	Exopercent	0
Mcav	Orange	3	Orange3	IDS	8		Gastrosep	0
Mcav	Orange	3	Orange3	IDS	9	5	Exopercent	0
Mcav	Orange	3	Orange3	IDS	9		Gastrosep	22.405
Mcav	Orange	3	Orange3	IDS	10	1	Exopercent	0.2
Mcav	Orange	3	Orange3	IDS	10		Gastrosep	30.636
Mcav	Orange	3	Orange3	IDS			Zooxarea	0.660626
Mcav	Orange	3	Orange3	IDS			Zooxarea	0.697063
Mcav	Orange	3	Orange3	IDS			Zooxarea	0.611028
Mcav	Orange	3	Orange3	IDS			Zooxarea	0.589266
Mcav	Orange	3	Orange3	IDS			Zooxarea	0.534493
Mcav	Orange	3	Orange3	IDS			Zooxarea	0.509136
Mcav	Orange	3	Orange3	IDS			Zooxarea	0.802574
Mcav	Orange	3	Orange3	IDS			Zooxarea	0.468317
Mcav	Orange	3	Orange3	IDS			Zooxarea	0.532995
Mcav	Orange	3	Orange3	IDS			Zooxarea	0.41192
Mcav	Orange	3	Orange3	IDS			Zooxarea	0.580733
Mcav	Orange	3	Orange3	IDS			Zooxarea	0.310133
Mcav	Orange	3	Orange3	IDS			Zooxarea	0.583707
Mcav	Orange	3	Orange3	IDS			Zooxarea	0.596839
Mcav	Orange	3	Orange3	IDS			Zooxarea	0.611982
Mcav	Orange	3	Orange3	IDS			Zooxarea	0.526088
Mcav	Orange	3	Orange3	IDS			Zooxarea	0.46112
Mcav	Orange	3	Orange3	IDS			Zooxarea	0.52499
Mcav	Orange	3	Orange3	IDS			Zooxarea	0.608644
Mcav	Orange	3	Orange3	IDS			Zooxarea	0.556218
Mcav	Orange	3	Orange3	IDS			Zooxarea	0.488353
Mcav	Orange	3	Orange3	IDS			Zooxarea	0.53093
Mcav	Orange	3	Orange3	IDS			Zooxarea	0.542665
Mcav	Orange	3	Orange3	IDS			Zooxarea	0.455239
Mcav	Orange	3	Orange3	IDS			Zooxarea	0.467133
Mcav	Red	2	Red2	IDS	1	10	Exopercent	0
Mcav	Red	2	Red2	IDS	1		Gastrosep	0
Mcav	Red	2	Red2	IDS	2	2	Exopercent	0
Mcav	Red	2	Red2	IDS	2		Gastrosep	0
Mcav	Red	2	Red2	IDS	3	2	Exopercent	0
Mcav	Red	2	Red2	IDS	3		Gastrosep	10.899
Mcav	Red	2	Red2	IDS	4	11	Exopercent	0
Mcav	Red	2	Red2	IDS	4		Gastrosep	10.203
Mcav	Red	2	Red2	IDS	5	11	Exopercent	0
Mcav	Red	2	Red2	IDS	5		Gastrosep	6.768
Mcav	Red	2	Red2	IDS	6	3	Exopercent	0
Mcav	Red	2	Red2	IDS	6		Gastrosep	0
Mcav	Red	2	Red2	IDS	7	9	Exopercent	0
Mcav	Red	2	Red2	IDS	7		Gastrosep	46.263
Mcav	Red	2	Red2	IDS	8	10	Exopercent	0
Mcav	Red	2	Red2	IDS	8		Gastrosep	0
Mcav	Red	2	Red2	IDS	9	12	Exopercent	0
Mcav	Red	2	Red2	IDS	9		Gastrosep	6.543
Mcav	Red	2	Red2	IDS	10	5	Exopercent	0
Mcav	Red	2	Red2	IDS	10		Gastrosep	0
Mcav	Red	2	Red2	IDS			Zooxarea	0.540283
Mcav	Red	2	Red2	IDS			Zooxarea	0.477898
Mcav	Red	2	Red2	IDS			Zooxarea	0.379264
Mcav	Red	2	Red2	IDS			Zooxarea	0.394987
Mcav	Red	2	Red2	IDS			Zooxarea	0.522608
Mcav	Red	2	Red2	IDS			Zooxarea	0.548484
Mcav	Red	2	Red2	IDS			Zooxarea	0.583851
Mcav	Red	2	Red2	IDS			Zooxarea	0.395699
Mcav	Red	2	Red2	IDS			Zooxarea	0.385713
Mcav	Red	2	Red2	IDS			Zooxarea	0.400982
Mcav	Red	2	Red2	IDS			Zooxarea	0.604874
Mcav	Red	2	Red2	IDS			Zooxarea	0.603002
Mcav	Red	2	Red2	IDS			Zooxarea	0.559491
Mcav	Red	2	Red2	IDS			Zooxarea	0.785624
Mcav	Red	2	Red2	IDS			Zooxarea	0.581367
Mcav	Red	2	Red2	IDS			Zooxarea	0.666697
Mcav	Red	2	Red2	IDS			Zooxarea	0.466182
Mcav	Red	2	Red2	IDS			Zooxarea	0.586106
Mcav	Red	2	Red2	IDS			Zooxarea	0.527467
Mcav	Red	2	Red2	IDS			Zooxarea	0.713767
Mcav	Red	2	Red2	IDS			Zooxarea	0.567452
Mcav	Red	2	Red2	IDS			Zooxarea	0.520398
Mcav	Red	2	Red2	IDS			Zooxarea	0.548717
Mcav	Red	2	Red2	IDS			Zooxarea	0.595275
Mcav	Red	2	Red2	IDS			Zooxarea	0.550062
Mcav	Red	3	Red3	IDS	1	10	Exopercent	0
Mcav	Red	3	Red3	IDS	1		Gastrosep	0
Mcav	Red	3	Red3	IDS	2	11	Exopercent	0
Mcav	Red	3	Red3	IDS	2		Gastrosep	NA
Mcav	Red	3	Red3	IDS	3	1	Exopercent	0
Mcav	Red	3	Red3	IDS	3		Gastrosep	35.498
Mcav	Red	3	Red3	IDS	4	7	Exopercent	0
Mcav	Red	3	Red3	IDS	4		Gastrosep	NA
Mcav	Red	3	Red3	IDS	5	12	Exopercent	0
Mcav	Red	3	Red3	IDS	5		Gastrosep	0
Mcav	Red	3	Red3	IDS	6	5	Exopercent	0.2
Mcav	Red	3	Red3	IDS	6		Gastrosep	21.477
Mcav	Red	3	Red3	IDS	7	3	Exopercent	0
Mcav	Red	3	Red3	IDS	7		Gastrosep	4.257
Mcav	Red	3	Red3	IDS	8	6	Exopercent	0
Mcav	Red	3	Red3	IDS	8		Gastrosep	58.712
Mcav	Red	3	Red3	IDS	9	4	Exopercent	0
Mcav	Red	3	Red3	IDS	9		Gastrosep	0
Mcav	Red	3	Red3	IDS	10	9	Exopercent	0
Mcav	Red	3	Red3	IDS	10		Gastrosep	0
Mcav	Red	3	Red3	IDS			Zooxarea	0.633422
Mcav	Red	3	Red3	IDS			Zooxarea	0.503534
Mcav	Red	3	Red3	IDS			Zooxarea	0.477587
Mcav	Red	3	Red3	IDS			Zooxarea	0.497357
Mcav	Red	3	Red3	IDS			Zooxarea	0.44825
Mcav	Red	3	Red3	IDS			Zooxarea	0.48855
Mcav	Red	3	Red3	IDS			Zooxarea	0.510148
Mcav	Red	3	Red3	IDS			Zooxarea	0.620328
Mcav	Red	3	Red3	IDS			Zooxarea	0.417417
Mcav	Red	3	Red3	IDS			Zooxarea	0.471327
Mcav	Red	3	Red3	IDS			Zooxarea	0.538772
Mcav	Red	3	Red3	IDS			Zooxarea	0.620185
Mcav	Red	3	Red3	IDS			Zooxarea	0.439781
Mcav	Red	3	Red3	IDS			Zooxarea	0.529608
Mcav	Red	3	Red3	IDS			Zooxarea	0.608752
Mcav	Red	3	Red3	IDS			Zooxarea	0.539293
Mcav	Red	3	Red3	IDS			Zooxarea	0.516481
Mcav	Red	3	Red3	IDS			Zooxarea	0.765587
Mcav	Red	3	Red3	IDS			Zooxarea	0.513222
Mcav	Red	3	Red3	IDS			Zooxarea	0.61198
Mcav	Red	3	Red3	IDS			Zooxarea	0.642968
Mcav	Red	3	Red3	IDS			Zooxarea	0.561218
Mcav	Red	3	Red3	IDS			Zooxarea	0.616836
[truncated: 669 more rows]
