# Supplementary material for: Reef Sediments Can Act As a Stony Coral Tissue Loss Disease Vector
Source: Frontiers journal article supplement (doi:10.3389/fmars.2021.815698), 2022-01-13
Supplement: Data_Sheet_3.xlsx [file Data_Sheet_3.xlsx]

## Sheet: Sheet1
ASV_id	ASVs_final_renamed.fasta	Kingdom	Phylum	Class	Order	Family	Genus	Species	Sediment_013	Sediment_014	Sediment_015	Sediment_010	Sediment_011	Sediment_012	Sediment_043	Sediment_044	Sediment_045	Sediment_040	Sediment_041	Sediment_058	Sediment_060	Sediment_055	Sediment_056	Sediment_057	Sediment_004	Sediment_005	Sediment_006	Sediment_001	Sediment_002	Sediment_003	Sediment_007	Sediment_008	Sediment_009	Sediment_034	Sediment_035	Sediment_036	Sediment_031	Sediment_032	Sediment_033	Sediment_037	Sediment_038	Sediment_039	Sediment_049	Sediment_051	Sediment_046	Sediment_047	Sediment_048	Sediment_052	Sediment_053
3274f9a50a42298892f5509be2dc6da2	ASV2636	Bacteria	Planctomycetota	028H05-P-BN-P5	028H05-P-BN-P5	028H05-P-BN-P5	028H05-P-BN-P5	uncultured_bacterium	46	0	24	34	16	26	0	19	0	0	0	0	0	21	0	33	22	38	0	21	18	29	13	26	7	0	0	0	0	0	25	0	0	0	23	35	0	28	0	20	14
893220782d94b9197df3023bfb2043d4	ASV3340	Bacteria	Planctomycetota	028H05-P-BN-P5	028H05-P-BN-P5	028H05-P-BN-P5	028H05-P-BN-P5	uncultured_bacterium	18	0	12	0	13	0	0	0	0	0	11	17	17	0	0	0	0	0	0	0	0	0	17	0	6	0	0	12	14	0	0	0	0	12	0	27	0	0	0	0	0
ac25b7c3e906db9954ae764b88405d2d	ASV3626	Bacteria	Planctomycetota	028H05-P-BN-P5	028H05-P-BN-P5	028H05-P-BN-P5	028H05-P-BN-P5	uncultured_bacterium	0	9	0	0	0	0	0	0	0	0	0	0	0	23	0	0	0	20	0	0	0	0	0	0	0	28	26	0	0	0	0	0	22	0	0	0	0	0	0	0	0
2ff0a354421e9f0fbccf539fd0c24217	ASV400	Bacteria	Planctomycetota	028H05-P-BN-P5	028H05-P-BN-P5	028H05-P-BN-P5	028H05-P-BN-P5	uncultured_bacterium	0	0	0	25	0	0	0	0	0	0	0	0	0	0	0	0	0	32	0	12	0	0	0	0	0	0	0	0	0	0	0	0	0	0	0	0	0	0	0	0	0
96acff6354cef54d68c4734d8b40ad1c	ASV2050	Bacteria	Planctomycetota	028H05-P-BN-P5	028H05-P-BN-P5	028H05-P-BN-P5	028H05-P-BN-P5	uncultured_bacterium	0	0	0	0	0	0	0	22	0	0	0	0	0	0	0	0	0	0	0	0	0	0	0	0	0	12	0	0	0	0	0	0	14	0	0	0	0	0	0	9	0
07815dba8012f903ed4454b70533fd45	ASV2779	Bacteria	Planctomycetota	028H05-P-BN-P5	028H05-P-BN-P5	028H05-P-BN-P5	028H05-P-BN-P5	uncultured_bacterium	0	0	0	0	0	0	18	0	0	0	0	0	0	0	0	0	0	0	0	0	0	0	0	0	6	0	0	0	0	0	0	0	0	0	12	15	0	0	0	0	0
0daed6d468c3f6a4d1887a041ad6180a	ASV73	Bacteria	Planctomycetota	028H05-P-BN-P5	028H05-P-BN-P5	028H05-P-BN-P5	028H05-P-BN-P5	uncultured_bacterium	5	0	0	0	0	0	5	7	12	0	0	0	0	0	0	0	0	0	4	0	0	0	0	0	7	0	0	0	0	0	0	0	0	0	0	0	0	0	0	0	0
266c0c0ca46842cadafb5e45fab35604	ASV2173	Bacteria	Planctomycetota	028H05-P-BN-P5	028H05-P-BN-P5	028H05-P-BN-P5	028H05-P-BN-P5	uncultured_bacterium	0	0	0	0	0	0	0	0	0	0	0	0	0	0	0	11	0	0	0	0	0	0	0	0	0	0	0	0	0	0	0	0	0	0	0	0	11	0	0	0	0
dea27d16336539ab510f604d42f18bfc	ASV4678	Bacteria	Planctomycetota	028H05-P-BN-P5	028H05-P-BN-P5	028H05-P-BN-P5	028H05-P-BN-P5	uncultured_bacterium	0	0	0	0	0	0	0	20	0	0	0	0	0	0	0	0	0	0	0	0	0	0	0	0	0	0	0	0	0	0	0	0	0	0	0	0	0	0	0	0	0
33c5556999e32ed6c6938b8172549cfe	ASV1539	Bacteria	Bdellovibrionota	Oligoflexia	0319-6G20	0319-6G20	0319-6G20	uncultured_bacterium	0	0	0	0	0	5	10	0	0	9	12	0	0	4	0	0	0	0	7	4	0	9	0	4	0	0	10	0	0	0	13	8	0	17	30	0	4	0	5	0	0
d0ea92011f09ce72be7cb2b02b2e93a5	ASV4403	Bacteria	Bdellovibrionota	Oligoflexia	0319-6G20	0319-6G20	0319-6G20	uncultured_bacterium	0	0	0	0	0	0	0	27	0	0	5	0	0	0	0	0	0	0	0	0	8	0	0	12	0	7	4	8	0	0	0	5	2	11	0	0	0	0	17	0	0
5d9a89331767340d8970826383750b2d	ASV748	Bacteria	Bdellovibrionota	Oligoflexia	0319-6G20	0319-6G20	0319-6G20	NA	0	0	0	0	0	0	0	0	0	0	7	0	0	0	0	0	0	0	0	0	0	0	0	0	0	13	0	11	21	10	0	3	18	2	0	0	0	0	0	0	0
a13e0608c90dc321ba5ce6c6246cb859	ASV3468	Bacteria	Bdellovibrionota	Oligoflexia	0319-6G20	0319-6G20	0319-6G20	NA	0	0	0	0	0	0	0	0	0	0	0	4	0	0	0	0	14	24	0	5	0	0	0	0	10	0	0	0	0	0	0	0	0	0	0	0	6	0	0	3	0
5eb993df3ece8dfd4de881fddf9da949	ASV776	Bacteria	Bdellovibrionota	Oligoflexia	0319-6G20	0319-6G20	0319-6G20	uncultured_bacterium	8	0	0	0	0	7	0	0	0	0	0	0	0	0	0	0	13	0	0	0	0	0	0	0	10	0	0	0	0	0	0	0	0	0	0	0	7	10	0	6	0
3958f306b518c50ab6a1385f9cf93de4	ASV2652	Bacteria	Bdellovibrionota	Oligoflexia	0319-6G20	0319-6G20	0319-6G20	uncultured_bacterium	0	0	7	0	0	5	0	0	0	0	0	0	0	0	0	0	6	0	0	0	0	0	10	14	0	0	0	0	0	0	9	0	0	0	0	0	5	0	0	0	0
0b900718e0c164f131b5b8f9c4951059	ASV36	Bacteria	Bdellovibrionota	Oligoflexia	0319-6G20	0319-6G20	0319-6G20	NA	14	0	0	0	0	0	0	0	0	0	0	0	0	0	6	10	0	0	0	0	7	0	0	0	0	0	0	0	0	0	0	0	0	0	0	0	0	0	0	7	0
14db98ed4bb5590e2163b7cdce3f97b5	ASV1398	Bacteria	Bdellovibrionota	Oligoflexia	0319-6G20	0319-6G20	0319-6G20	uncultured_organism	7	0	0	0	0	0	0	0	0	0	0	0	0	0	0	0	0	0	0	0	0	0	17	0	0	0	0	0	0	0	4	0	0	0	0	12	0	0	0	0	0
f16a41da0477aba29883f2ac3edc5e22	ASV5165	Bacteria	Bdellovibrionota	Oligoflexia	0319-6G20	0319-6G20	0319-6G20	uncultured_bacterium	0	6	0	0	0	0	0	0	0	0	0	0	0	0	0	0	0	4	0	8	0	0	0	0	0	0	0	0	0	0	0	0	0	0	0	0	7	0	0	0	6
e75c5e44e8e8b87a13d5afd54eac24e2	ASV4862	Bacteria	Bdellovibrionota	Oligoflexia	0319-6G20	0319-6G20	0319-6G20	uncultured_organism	0	0	0	0	0	0	0	0	0	0	0	0	0	0	0	0	0	0	0	0	0	0	0	0	0	30	0	0	0	0	0	0	0	0	0	0	0	0	0	0	0
049607cc4044be1780fbc256cb18c364	ASV2959	Bacteria	Bdellovibrionota	Oligoflexia	0319-6G20	0319-6G20	0319-6G20	NA	0	0	11	0	0	7	0	0	0	0	0	5	0	0	5	0	0	0	0	0	0	0	0	0	0	0	0	0	0	0	0	0	0	0	0	0	0	0	0	0	0
dbe25aab93beea091f68df97c4cc8792	ASV4615	Bacteria	Bdellovibrionota	Oligoflexia	0319-6G20	0319-6G20	0319-6G20	NA	0	0	0	0	0	0	0	0	0	0	0	0	0	0	0	0	0	0	0	0	0	0	0	0	0	0	0	0	0	0	0	0	0	0	0	0	0	0	25	0	0
09f3b15a03d4ef750145017532b1eb7c	ASV1337	Bacteria	Bdellovibrionota	Oligoflexia	0319-6G20	0319-6G20	0319-6G20	NA	0	0	0	0	0	5	0	0	0	0	0	0	0	0	0	0	4	0	0	0	7	0	4	0	0	0	0	0	0	0	3	0	0	0	0	0	0	0	0	0	0
5a0f4c1987c704efa56127e4f5e95f08	ASV677	Bacteria	Bdellovibrionota	Oligoflexia	0319-6G20	0319-6G20	0319-6G20	uncultured_organism	0	0	0	0	0	0	0	0	0	3	0	0	0	0	0	0	0	0	0	0	0	8	0	11	0	0	0	0	0	0	0	0	0	0	0	0	0	0	0	0	0
495ae306372d421da7494a6b331ffb10	ASV2306	Bacteria	Patescibacteria	Gracilibacteria	Absconditabacteriales_SR1	Absconditabacteriales_SR1	Absconditabacteriales_SR1	NA	0	0	0	0	0	0	0	0	0	0	0	27	0	0	0	0	0	0	0	0	0	0	0	0	0	0	0	0	0	0	0	0	0	0	0	0	0	0	0	0	0
bf72bbc3d18a38df2f2518dee83deccc	ASV4012	Bacteria	Patescibacteria	Gracilibacteria	Absconditabacteriales_SR1	Absconditabacteriales_SR1	Absconditabacteriales_SR1	uncultured_bacterium	0	0	0	0	0	0	0	4	0	0	0	0	0	0	0	0	0	0	0	0	0	0	0	0	0	6	0	10	0	0	0	0	0	0	0	0	0	0	0	0	0
15f89826ce0b0a0eec20286293c37b55	ASV1407	Bacteria	Acidobacteriota	Holophagae	Acanthopleuribacterales	Acanthopleuribacteraceae	Acanthopleuribacter	uncultured_bacterium	631	209	845	493	797	579	141	143	106	0	108	480	324	499	383	412	349	793	179	281	708	668	457	341	149	107	122	139	142	78	973	171	72	143	174	570	727	758	142	437	186
d37aff42c8b510e115b2f02df3268334	ASV4486	Bacteria	Acidobacteriota	Holophagae	Acanthopleuribacterales	Acanthopleuribacteraceae	Acanthopleuribacter	uncultured_bacterium	305	140	138	85	235	206	547	1463	1041	281	925	55	52	59	118	257	151	161	234	101	339	148	299	284	61	704	351	469	390	556	565	682	687	510	160	170	304	245	591	139	93
f4f0430132cb55b5fd70b2914f2954f1	ASV5113	Bacteria	Acidobacteriota	Holophagae	Acanthopleuribacterales	Acanthopleuribacteraceae	Acanthopleuribacter	uncultured_bacterium	277	87	403	227	343	294	0	0	0	33	42	195	147	233	161	170	170	426	99	96	358	302	257	150	109	0	0	61	53	0	461	0	0	0	90	226	288	288	62	198	63
9841922881d5a19d6ce325da06ce7a07	ASV3358	Bacteria	Acidobacteriota	Holophagae	Acanthopleuribacterales	Acanthopleuribacteraceae	Acanthopleuribacter	uncultured_bacterium	20	5	175	17	387	282	7	15	20	10	5	98	237	187	40	0	0	4	95	11	0	240	177	21	25	21	0	8	26	9	293	23	36	4	5	0	0	65	18	0	0
61df2a9bf97badb128d8472cc12d2d1c	ASV1744	Bacteria	Acidobacteriota	Holophagae	Acanthopleuribacterales	Acanthopleuribacteraceae	Acanthopleuribacter	uncultured_bacterium	0	0	0	0	0	0	77	247	220	179	40	0	0	0	16	0	0	0	42	0	0	0	0	0	0	177	13	148	130	282	0	56	91	454	0	0	0	0	77	0	0
88afcf33f8e894605ec5d620316ae195	ASV1987	Bacteria	Acidobacteriota	Holophagae	Acanthopleuribacterales	Acanthopleuribacteraceae	Acanthopleuribacter	uncultured_bacterium	33	21	70	40	195	75	0	30	15	0	14	15	26	58	22	26	48	22	27	24	116	56	52	38	23	11	0	0	0	0	94	22	0	12	56	34	46	78	21	0	8
f3a660fe2d03371f7833a31dad9d9a76	ASV5097	Bacteria	Acidobacteriota	Holophagae	Acanthopleuribacterales	Acanthopleuribacteraceae	Acanthopleuribacter	uncultured_bacterium	34	38	27	12	32	18	0	28	0	0	24	0	0	9	18	30	54	51	42	27	28	17	15	49	29	8	34	0	0	8	19	22	15	29	36	63	95	29	20	14	21
ecbd2eedf89ca549f57f8db82962fd65	ASV4995	Bacteria	Acidobacteriota	Holophagae	Acanthopleuribacterales	Acanthopleuribacteraceae	Acanthopleuribacter	Acanthopleuribacter_pedis	24	13	30	7	20	31	0	0	0	0	0	45	8	0	19	71	74	0	0	0	23	17	22	34	10	14	0	0	0	0	166	0	0	0	128	31	51	13	0	0	15
161109484eb66ef7f9ea50713a6b01d2	ASV3318	Bacteria	Acidobacteriota	Holophagae	Acanthopleuribacterales	Acanthopleuribacteraceae	Acanthopleuribacter	uncultured_bacterium	0	12	11	0	17	0	0	0	0	0	0	0	0	12	9	10	10	0	0	0	8	0	29	201	0	0	0	0	0	0	50	0	0	0	31	0	12	26	0	0	0
88c4189bfdea472f305cb5628eedbbc8	ASV1988	Bacteria	Acidobacteriota	Holophagae	Acanthopleuribacterales	Acanthopleuribacteraceae	Acanthopleuribacter	uncultured_bacterium	31	14	10	0	13	0	0	0	0	0	0	0	14	0	14	29	10	35	0	0	18	9	25	17	0	0	0	0	0	0	25	0	0	0	0	34	35	42	0	11	0
c8913efd56483914a94399fea4281a11	ASV4230	Bacteria	Acidobacteriota	Holophagae	Acanthopleuribacterales	Acanthopleuribacteraceae	Acanthopleuribacter	uncultured_bacterium	0	0	0	0	0	0	0	0	0	0	0	0	0	0	0	0	0	0	0	0	87	0	0	0	0	0	0	0	0	0	0	0	0	0	0	87	118	54	0	0	0
91749d592e68adbbf48f066564ea482b	ASV3038	Bacteria	Acidobacteriota	Holophagae	Acanthopleuribacterales	Acanthopleuribacteraceae	Acanthopleuribacter	uncultured_bacterium	0	0	0	0	8	0	12	0	0	0	0	3	0	0	0	10	0	19	0	6	135	15	0	0	6	7	0	0	11	0	38	0	0	0	20	0	11	6	0	6	7
9710a2550edfde315ef60c81248c7f19	ASV2853	Bacteria	Acidobacteriota	Holophagae	Acanthopleuribacterales	Acanthopleuribacteraceae	Acanthopleuribacter	uncultured_bacterium	0	0	14	29	0	0	0	0	0	0	14	0	0	0	0	19	24	0	0	37	0	0	0	36	0	0	10	0	0	6	35	0	7	0	0	32	11	0	7	0	0
31e361c08e42bae30aa6231106dbb796	ASV1525	Bacteria	Acidobacteriota	Holophagae	Acanthopleuribacterales	Acanthopleuribacteraceae	Acanthopleuribacter	uncultured_bacterium	0	0	28	0	0	0	15	0	27	0	11	0	0	17	0	0	7	7	0	28	0	0	11	0	0	0	17	0	0	0	29	5	7	8	0	0	0	0	14	0	0
ded86fd83924243966e19d631d134b65	ASV4682	Bacteria	Acidobacteriota	Holophagae	Acanthopleuribacterales	Acanthopleuribacteraceae	Acanthopleuribacter	NA	0	0	0	0	0	0	0	0	13	0	0	0	0	0	0	0	0	0	0	0	0	0	0	0	0	10	0	118	12	0	0	0	10	0	0	0	0	0	20	0	0
193a42d2909a36aa37fb96306a75c2ca	ASV2142	Bacteria	Acidobacteriota	Holophagae	Acanthopleuribacterales	Acanthopleuribacteraceae	Acanthopleuribacter	uncultured_bacterium	9	0	0	0	0	8	0	0	0	0	0	0	0	0	0	20	0	18	0	12	23	0	0	22	0	0	0	0	0	0	0	0	0	0	5	20	12	9	0	6	10
d40b9657998855f4ad580e7bc0e7c5ea	ASV4488	Bacteria	Acidobacteriota	Holophagae	Acanthopleuribacterales	Acanthopleuribacteraceae	Acanthopleuribacter	uncultured_bacterium	0	0	0	0	0	0	10	53	0	15	0	0	0	0	0	0	0	0	0	0	0	0	0	0	0	13	0	0	12	0	0	7	18	5	0	0	0	0	0	0	0
ae20b5528e1e70de1c05082206878121	ASV3662	Bacteria	Acidobacteriota	Holophagae	Acanthopleuribacterales	Acanthopleuribacteraceae	Acanthopleuribacter	uncultured_bacterium	0	0	0	0	0	0	0	0	0	0	0	0	0	0	0	0	0	0	0	0	24	0	14	0	0	0	0	13	0	0	0	0	0	0	18	17	22	0	0	0	0
d492d3bb4aeae70f818edd24ef560218	ASV4521	Bacteria	Acidobacteriota	Holophagae	Acanthopleuribacterales	Acanthopleuribacteraceae	Acanthopleuribacter	uncultured_Acidobacteria	19	0	0	0	3	0	0	0	0	0	0	0	0	0	4	11	0	0	0	5	14	0	8	7	0	0	0	0	0	0	0	9	0	0	0	0	7	0	0	0	20
7232c5f385042dd970dc41617bff9c8b	ASV2761	Bacteria	Acidobacteriota	Holophagae	Acanthopleuribacterales	Acanthopleuribacteraceae	Acanthopleuribacter	uncultured_bacterium	0	0	0	0	0	0	0	0	0	0	0	0	0	0	0	0	0	0	0	0	16	0	0	0	0	0	0	0	0	0	0	0	52	0	0	0	0	21	0	0	0
07965314d7a0e9f6e1dc0ba05e8b29a0	ASV3260	Bacteria	Acidobacteriota	Holophagae	Acanthopleuribacterales	Acanthopleuribacteraceae	Acanthopleuribacter	uncultured_bacterium	0	0	0	0	0	0	0	0	0	0	0	0	0	0	0	0	0	0	0	0	0	0	0	0	0	0	0	83	0	0	0	0	0	0	0	0	0	0	0	0	0
534d5abbc23b3b165b632d93fa029ff4	ASV2324	Bacteria	Acidobacteriota	Holophagae	Acanthopleuribacterales	Acanthopleuribacteraceae	Acanthopleuribacter	uncultured_bacterium	0	0	0	8	0	0	0	0	0	0	0	0	0	0	14	7	0	0	0	9	0	0	0	16	0	0	0	0	0	0	0	0	0	0	0	0	11	0	0	0	0
00e6ac0f1522f70105608d9f340f7ad9	ASV86	Bacteria	Acidobacteriota	Holophagae	Acanthopleuribacterales	Acanthopleuribacteraceae	Acanthopleuribacter	NA	0	0	0	0	0	0	0	0	0	0	0	0	0	0	0	0	0	0	0	0	0	0	0	0	0	0	0	0	27	0	0	0	0	0	0	0	0	25	0	0	0
d754b67864bd5a262a4c27c36b0f4ac3	ASV4524	Bacteria	Acidobacteriota	Holophagae	Acanthopleuribacterales	Acanthopleuribacteraceae	Acanthopleuribacter	uncultured_bacterium	0	6	0	0	0	0	0	0	0	0	0	0	0	0	0	0	0	15	0	8	0	0	0	8	0	0	0	0	0	0	0	0	0	0	0	0	11	0	0	0	0
7439fb9e9e4ff2d8e8a34141ed4ae227	ASV2767	Bacteria	Acidobacteriota	Holophagae	Acanthopleuribacterales	Acanthopleuribacteraceae	Acanthopleuribacter	uncultured_bacterium	0	0	0	0	0	0	0	14	0	0	0	0	0	0	0	0	0	0	0	0	0	0	0	0	0	0	0	10	0	0	0	12	0	0	0	0	0	0	10	0	0
6710086b7637c891a63bc7cec3777254	ASV3245	Bacteria	Acidobacteriota	Holophagae	Acanthopleuribacterales	Acanthopleuribacteraceae	Acanthopleuribacter	uncultured_bacterium	0	0	0	0	0	0	0	0	0	0	0	0	0	0	0	0	0	0	0	0	0	0	0	0	0	0	0	0	0	0	0	0	44	0	0	0	0	0	0	0	0
7dc57b814e09e84f7921dc32a8451564	ASV1016	Bacteria	Acidobacteriota	Holophagae	Acanthopleuribacterales	Acanthopleuribacteraceae	Acanthopleuribacter	uncultured_bacterium	0	0	0	0	0	0	0	11	16	0	0	0	0	0	0	0	13	0	0	0	0	0	0	0	0	0	0	0	0	0	0	0	0	0	0	0	0	0	0	0	0
8b735eda442529b94dbc66c3f2c282b4	ASV1104	Bacteria	Acidobacteriota	Holophagae	Acanthopleuribacterales	Acanthopleuribacteraceae	Acanthopleuribacter	Acanthopleuribacter_pedis	0	0	0	0	0	0	0	0	0	0	0	0	0	0	0	0	0	0	0	0	0	0	0	0	0	0	0	6	6	0	0	15	13	0	0	0	0	0	0	0	0
effe9d3179bddaa48051964087223035	ASV5076	Bacteria	Acidobacteriota	Holophagae	Acanthopleuribacterales	Acanthopleuribacteraceae	Acanthopleuribacter	uncultured_bacterium	0	0	0	0	0	0	0	0	0	0	0	0	0	0	0	0	0	0	0	0	0	0	0	0	0	0	0	0	0	0	0	0	0	0	0	0	0	0	0	35	0
79eededf06cd4efcd07ebf97ed811a64	ASV1901	Bacteria	Acidobacteriota	Holophagae	Acanthopleuribacterales	Acanthopleuribacteraceae	Acanthopleuribacter	uncultured_bacterium	0	0	0	0	0	0	0	0	0	0	0	0	30	0	0	0	0	0	0	0	0	0	0	0	0	0	0	0	0	0	0	0	0	0	0	0	0	0	0	0	0
eb5aabf3d17fba3a76fd8f4bcf0bdb54	ASV4960	Bacteria	Acidobacteriota	Holophagae	Acanthopleuribacterales	Acanthopleuribacteraceae	Acanthopleuribacter	uncultured_bacterium	0	0	0	0	0	0	0	0	7	0	0	0	0	0	0	0	0	0	4	0	0	0	0	0	0	0	7	0	0	0	0	0	0	0	0	0	0	0	12	0	0
39c4f975a09c53cb487485d714c1e4f8	ASV1580	Bacteria	Acidobacteriota	Holophagae	Acanthopleuribacterales	Acanthopleuribacteraceae	Acanthopleuribacter	uncultured_bacterium	0	0	0	0	0	0	0	0	0	0	0	0	0	0	0	0	0	21	0	0	0	0	0	0	0	0	0	0	0	0	0	0	0	0	0	0	0	0	0	0	0
01c807687fae191ad1cce0adffc73d3d	ASV186	Bacteria	Acidobacteriota	Holophagae	Acanthopleuribacterales	Acanthopleuribacteraceae	Acanthopleuribacter	uncultured_bacterium	0	0	0	0	0	0	0	0	0	0	0	0	0	0	0	0	0	0	0	0	0	0	0	0	0	0	0	0	0	0	0	0	0	0	0	0	0	0	0	0	20
6a0f9d55d85568dd50fbe77d11e7c072	ASV807	Bacteria	Acidobacteriota	Holophagae	Acanthopleuribacterales	Acanthopleuribacteraceae	Acanthopleuribacter	uncultured_bacterium	0	0	0	0	0	0	0	0	0	0	0	0	0	0	0	0	0	20	0	0	0	0	0	0	0	0	0	0	0	0	0	0	0	0	0	0	0	0	0	0	0
479a3380a84829551b2a3e1470a5425f	ASV2294	Bacteria	Actinobacteriota	Acidimicrobiia	Actinomarinales	uncultured	uncultured	NA	53	24	18	28	18	15	0	0	11	10	0	39	34	36	50	44	20	76	0	59	32	19	83	38	95	0	9	0	0	0	44	0	0	34	0	36	102	45	12	49	89
093a41cbf7db86854685fa281704b756	ASV2029	Bacteria	Actinobacteriota	Acidimicrobiia	Actinomarinales	uncultured	uncultured	NA	69	19	0	5	0	0	0	0	0	0	7	45	19	0	26	46	8	77	10	39	28	26	77	47	74	0	0	0	0	0	57	0	0	0	0	19	74	41	0	18	80
24d66e51c60e3d9ca3e037198d966242	ASV1467	Bacteria	Actinobacteriota	Acidimicrobiia	Actinomarinales	uncultured	uncultured	uncultured_actinobacterium	36	20	29	0	18	33	0	0	0	0	0	40	28	35	22	0	0	22	0	35	34	35	61	11	33	0	0	0	0	0	27	19	0	0	0	0	0	38	0	24	30
4cb40c2a49ee5d96035e6ea50860b4cb	ASV592	Bacteria	Actinobacteriota	Acidimicrobiia	Actinomarinales	uncultured	uncultured	NA	0	0	38	0	0	0	0	0	8	5	0	0	32	32	0	0	0	0	11	0	0	0	35	46	45	0	14	0	0	0	0	0	0	18	9	50	0	66	0	0	0
9b0e2d218ff50c72582801fef1aa5bd5	ASV1234	Bacteria	Actinobacteriota	Acidimicrobiia	Actinomarinales	uncultured	uncultured	uncultured_bacterium	49	26	0	26	0	27	0	0	0	0	0	0	0	0	0	0	0	88	0	38	0	0	0	0	0	0	0	0	0	0	0	0	0	0	0	0	56	0	0	39	44
df07be42a1bfedea4c53b0025ee25198	ASV4696	Bacteria	Actinobacteriota	Acidimicrobiia	Actinomarinales	uncultured	uncultured	NA	17	16	0	17	26	0	0	0	0	0	0	0	0	0	25	0	0	14	0	0	49	36	23	0	0	0	0	0	0	0	0	0	0	0	0	17	40	0	0	0	18
8893f36c720932b51e19498c798bc512	ASV2820	Bacteria	Actinobacteriota	Acidimicrobiia	Actinomarinales	uncultured	uncultured	uncultured_actinobacterium	0	5	18	0	0	10	11	0	0	0	0	11	8	0	0	10	6	15	0	16	0	9	23	0	12	0	0	0	0	0	17	0	0	0	0	0	0	12	0	6	0
479fb89e7fcd385b01a98c442434d309	ASV2295	Bacteria	Actinobacteriota	Acidimicrobiia	Actinomarinales	uncultured	uncultured	NA	0	0	0	0	22	13	13	0	0	0	0	0	0	15	0	0	0	0	0	0	0	0	38	0	0	0	0	0	0	0	30	8	0	0	0	0	0	0	0	0	0
835cc03ac575d168032e1fd221eb9afc	ASV2479	Bacteria	Actinobacteriota	Acidimicrobiia	Actinomarinales	uncultured	uncultured	NA	0	0	0	0	0	0	0	0	0	0	0	11	0	0	0	15	0	0	0	0	13	0	0	0	12	0	0	0	0	0	0	0	0	0	0	0	0	18	7	0	0
17c6e5debaa09f319726fee66bb6c2c6	ASV1417	Bacteria	Actinobacteriota	Acidimicrobiia	Actinomarinales	uncultured	uncultured	NA	0	21	19	0	0	0	0	0	0	0	0	0	0	0	0	0	0	0	0	19	0	0	0	0	0	0	0	0	0	0	0	0	0	0	0	0	0	0	0	0	0
0901a77d8670c88ab900c55c5f6c6bdf	ASV2516	Bacteria	Actinobacteriota	Acidimicrobiia	Actinomarinales	uncultured	uncultured	NA	0	0	0	0	0	0	0	0	0	13	0	0	0	7	0	8	0	0	7	0	0	0	0	0	0	9	0	0	0	0	0	0	0	0	0	0	11	0	0	0	0
6f48df5cd347a72ff7a9d388cbcd53a2	ASV920	Bacteria	Actinobacteriota	Acidimicrobiia	Actinomarinales	uncultured	uncultured	uncultured_actinobacterium	0	0	0	10	0	0	0	0	0	0	0	0	0	0	0	0	0	0	0	0	0	0	0	0	14	0	0	0	0	0	0	0	0	0	0	0	0	0	0	0	0
f501f59ceb42b428dfa610cd7c4e80d0	ASV5218	Bacteria	Actinobacteriota	Acidimicrobiia	Actinomarinales	uncultured	uncultured	NA	0	0	0	0	0	0	0	0	0	0	0	0	0	0	0	0	0	0	0	0	0	0	23	0	0	0	0	0	0	0	0	0	0	0	0	0	0	0	0	0	0
ad6c09ff6073a924c43fd3a3b79554c9	ASV3640	Bacteria	Actinobacteriota	Acidimicrobiia	Actinomarinales	uncultured	uncultured	NA	0	0	0	0	0	0	0	0	0	0	0	0	10	0	0	0	0	0	0	0	0	0	0	0	0	0	0	10	0	0	0	0	0	0	0	0	0	0	0	0	0
9f2e988b0ca2ad62e7a51b3634319934	ASV1336	Bacteria	Proteobacteria	Alphaproteobacteria	Alphaproteobacteria_Incertae_Sedis	Unknown_Family	uncultured	uncultured_Alphaproteobacteria	48	27	0	6	0	0	0	19	38	24	8	8	0	9	11	10	0	10	10	14	8	0	8	8	9	16	22	23	0	17	0	40	16	11	8	14	22	0	0	20	24
b40a5d5b9dd63648b6fb3486849b5350	ASV3793	Bacteria	Proteobacteria	Gammaproteobacteria	Alteromonadales	Alteromonadaceae	Aestuariibacter	NA	2149	1098	2117	1616	3688	1840	1660	2545	1375	818	1291	1169	1029	1232	1155	1280	1402	2161	1214	1691	1912	1985	2521	1299	949	2560	1027	2047	959	838	2838	2163	1114	1413	1170	1519	2198	1794	2080	986	1086
4f33622e26b4d0be1e0c986b615ce55b	ASV666	Bacteria	Proteobacteria	Gammaproteobacteria	Alteromonadales	Alteromonadaceae	Aestuariibacter	NA	1236	823	2153	834	1776	1993	340	410	216	176	169	1192	1009	1008	827	615	1013	1334	685	1394	1121	1683	2335	1339	537	688	134	218	155	251	1346	323	308	323	1017	1069	1230	1145	360	946	725
8147373c5e310f3b441e52dc333ce5d0	ASV3261	Bacteria	Proteobacteria	Gammaproteobacteria	Alteromonadales	Alteromonadaceae	Aestuariibacter	NA	76	42	332	71	254	340	253	332	220	66	158	134	123	122	91	32	76	84	221	133	109	184	214	110	41	602	154	148	248	97	112	196	384	252	166	78	61	150	433	68	45
123f6bafa1abedca46acb971d0c8b273	ASV2108	Bacteria	Proteobacteria	Gammaproteobacteria	Alteromonadales	Alteromonadaceae	Aestuariibacter	uncultured_bacterium	175	71	111	111	84	115	33	24	20	0	0	60	81	101	98	89	103	161	73	165	156	91	139	74	56	0	0	31	0	0	105	0	0	0	99	119	148	93	51	67	57
a5450a85282099de5d398355bb1c0894	ASV3542	Bacteria	Proteobacteria	Gammaproteobacteria	Alteromonadales	Alteromonadaceae	Aestuariibacter	uncultured_bacterium	163	0	222	161	101	110	0	0	0	0	0	74	101	0	75	60	98	169	0	136	144	130	132	101	70	0	0	0	0	0	108	0	0	0	91	119	129	0	0	90	0
220acca7c3497674503cae4769093585	ASV2155	Bacteria	Proteobacteria	Gammaproteobacteria	Alteromonadales	Alteromonadaceae	Aestuariibacter	Planctobacterium_marinum	0	0	0	0	0	0	0	0	0	0	0	0	0	0	0	0	0	66	0	0	0	0	0	0	0	0	0	0	0	0	0	0	0	0	24	36	0	0	0	0	0
8e0db844eb9b807cdabca7d147518b16	ASV1158	Bacteria	Proteobacteria	Gammaproteobacteria	Alteromonadales	Alteromonadaceae	Aestuariibacter	uncultured_bacterium	56	0	28	0	0	33	0	0	0	0	0	0	0	0	0	0	0	58	0	0	61	0	0	0	0	0	0	0	0	0	0	0	0	0	0	0	0	0	0	0	0
deee746bd844ab076ba13a4a7317ba4d	ASV4686	Bacteria	Proteobacteria	Gammaproteobacteria	Alteromonadales	Alteromonadaceae	Aestuariibacter	Aestuariibacter_sp.	11	0	0	0	0	0	0	0	0	0	0	0	0	0	24	0	11	0	0	0	0	0	0	0	0	5	0	0	0	0	29	0	10	6	0	12	39	0	0	29	10
f1041129366179ec76b330e8eaf4dcd5	ASV5269	Bacteria	Proteobacteria	Gammaproteobacteria	Alteromonadales	Alteromonadaceae	Aestuariibacter	NA	0	0	0	0	0	0	10	32	14	7	12	0	0	0	0	0	0	0	5	0	0	0	0	0	0	35	0	11	0	0	0	16	21	7	0	0	0	0	15	0	0
fcccfe742f038ba40c45b1651ebd1eab	ASV5336	Bacteria	Proteobacteria	Gammaproteobacteria	Alteromonadales	Alteromonadaceae	Aestuariibacter	uncultured_Alteromonadaceae	0	0	0	0	0	0	0	0	0	0	0	0	0	0	0	0	0	0	0	0	0	0	0	0	0	19	0	0	0	73	0	0	0	0	0	0	0	0	0	0	0
d809710c3c4c6a8d9c3d98a5c015c1f0	ASV4562	Bacteria	Proteobacteria	Gammaproteobacteria	Alteromonadales	Alteromonadaceae	Aestuariibacter	NA	0	0	0	0	0	0	0	0	0	0	0	0	0	0	0	0	0	0	0	0	0	0	0	0	0	0	0	0	58	0	0	0	0	0	0	0	0	0	0	0	0
a0ce8d61758b35756e7c6e062be3e4ad	ASV3389	Bacteria	Proteobacteria	Gammaproteobacteria	Alteromonadales	Alteromonadaceae	Aestuariibacter	Aestuariibacter_sp.	0	0	0	0	0	0	0	0	0	0	0	0	0	0	0	0	0	33	0	0	0	0	0	0	0	0	0	0	0	0	0	0	0	0	0	0	0	0	0	0	0
3d46f42551676e9a2ef6dcb2e04cff62	ASV476	Bacteria	Proteobacteria	Gammaproteobacteria	Alteromonadales	Alteromonadaceae	Aestuariibacter	NA	0	0	0	0	0	0	0	0	0	0	0	0	0	0	0	28	0	0	0	0	0	0	0	0	0	0	0	0	0	0	0	0	0	0	0	0	0	0	0	0	0
9e9fb96a9256022bbb6c8c88b895f4c0	ASV1309	Bacteria	Proteobacteria	Gammaproteobacteria	Alteromonadales	Alteromonadaceae	Aestuariibacter	NA	0	0	0	0	0	0	0	0	25	0	0	0	0	0	0	0	0	0	0	0	0	0	0	0	0	0	0	0	0	0	0	0	0	0	0	0	0	0	0	0	0
f419a7b369848cc9f971653f85cf7200	ASV5215	Bacteria	Proteobacteria	Gammaproteobacteria	Alteromonadales	Alteromonadaceae	Aestuariibacter	uncultured_bacterium	0	0	0	0	20	0	0	0	0	0	0	0	0	0	0	0	0	0	0	0	0	0	0	0	0	0	0	0	0	0	0	0	0	0	0	0	0	0	0	0	0
939ff1304be43c11ae81f0078ceae20a	ASV2530	Bacteria	Proteobacteria	Gammaproteobacteria	Alteromonadales	Pseudoalteromonadaceae	Algicola	NA	0	0	0	0	0	0	0	0	0	0	0	0	0	0	0	0	0	0	0	0	0	0	0	0	0	0	0	0	0	0	0	0	0	83	0	330	0	0	0	0	0
a59d027a5d9041fa4bff5a46d121ba5e	ASV3483	Bacteria	Proteobacteria	Gammaproteobacteria	Alteromonadales	Pseudoalteromonadaceae	Algicola	uncultured_bacterium	0	0	0	0	0	0	0	0	0	0	0	0	0	0	0	0	0	10	0	0	0	0	0	0	0	0	0	0	10	0	0	0	0	0	56	0	0	0	0	0	0
7ed9eaf0e3898a735d73489b791e7837	ASV1037	Bacteria	Proteobacteria	Gammaproteobacteria	Alteromonadales	Pseudoalteromonadaceae	Algicola	Algicola_bacteriolytica	0	0	0	0	0	0	0	0	0	0	0	0	0	0	0	0	0	0	0	0	0	0	0	0	0	0	0	0	0	12	0	0	20	0	0	8	0	0	0	20	0
c461ff41fced154ff031dd437c87a5ec	ASV4186	Bacteria	Proteobacteria	Gammaproteobacteria	Alteromonadales	Pseudoalteromonadaceae	Algicola	uncultured_gamma	0	0	0	0	0	0	0	0	0	15	0	0	0	0	0	0	12	0	0	0	0	0	0	0	0	31	0	0	0	0	0	0	0	0	0	0	0	0	0	0	0
7a1c52a7c47c20a8fefc87b43331c613	ASV933	Bacteria	Proteobacteria	Gammaproteobacteria	Alteromonadales	Pseudoalteromonadaceae	Algicola	Algicola_sagamiensis	0	0	0	0	0	0	0	0	0	0	0	0	0	0	48	0	0	0	0	0	0	0	0	0	0	0	0	0	0	0	0	0	0	0	0	0	0	0	0	0	0
4f6751172811f2f449a2960c1cbe1850	ASV670	Bacteria	Proteobacteria	Gammaproteobacteria	Alteromonadales	Pseudoalteromonadaceae	Algicola	uncultured_bacterium	0	0	0	0	0	0	0	0	0	0	0	0	0	0	0	0	0	0	0	10	0	0	0	0	0	0	0	0	0	12	0	3	0	0	0	0	0	0	8	0	0
e86b015343be4ad6979f21211e0eccdf	ASV4866	Bacteria	Proteobacteria	Gammaproteobacteria	Alteromonadales	Alteromonadaceae	Alteromonadaceae	Gammaproteobacteria_bacterium	0	0	0	0	0	0	0	15	0	0	0	0	0	0	0	0	0	0	0	0	0	0	0	0	0	0	23	9	17	0	0	0	8	0	0	0	0	0	0	0	0
e66f99fcaf7d1e8644a9c4c462593f21	ASV4858	Bacteria	Proteobacteria	Gammaproteobacteria	Alteromonadales	Alteromonadaceae	Alteromonadaceae	uncultured_gamma	0	0	0	10	0	0	0	0	0	0	0	0	0	0	0	0	0	15	0	0	0	0	0	0	0	0	0	0	0	0	0	0	0	0	0	0	8	0	0	0	0
fdae47c7f60b42438221cfb95805a52e	ASV5347	Bacteria	Proteobacteria	Gammaproteobacteria	Alteromonadales	Alteromonadaceae	Alteromonas	NA	102	67	116	49	185	91	30	45	36	0	0	71	53	53	43	49	95	69	33	65	88	111	98	62	46	51	0	40	0	0	85	29	0	0	118	107	157	53	47	39	48
cac36181701281e7d764b3efc09bf21b	ASV4280	Bacteria	Proteobacteria	Gammaproteobacteria	Alteromonadales	Colwelliaceae	Colwellia	NA	25	8	0	10	56	0	0	0	0	0	0	0	9	0	9	24	0	16	0	15	0	0	37	21	18	0	0	0	0	0	99	0	0	0	0	15	0	19	0	0	10
01d9cfd31073c82d296e8dcbe5774af4	ASV200	Bacteria	Proteobacteria	Gammaproteobacteria	Alteromonadales	Shewanellaceae	Ferrimonas	Ferrimonas_futtsuensis	464	187	270	86	341	272	71	103	97	34	97	125	79	164	45	195	141	230	83	169	147	250	450	297	315	77	220	94	22	63	484	128	68	98	202	172	285	179	102	114	134
9d2e3a6c295055f9e144e17d5f62f2cc	ASV1280	Bacteria	Proteobacteria	Gammaproteobacteria	Alteromonadales	Shewanellaceae	Ferrimonas	Ferrimonas_balearica	0	0	0	0	0	0	0	17	0	0	0	30	0	27	0	0	0	0	0	0	0	0	0	0	0	12	6	20	16	0	0	0	14	0	0	0	0	0	0	0	0
8238e54d5e618b6f2b9dfeb8abcd0a0c	ASV2799	Bacteria	Proteobacteria	Gammaproteobacteria	Alteromonadales	Marinobacteraceae	Marinobacter	NA	113	85	113	87	130	107	484	924	455	150	273	112	60	87	40	61	117	111	261	139	81	107	69	91	129	615	294	280	281	292	88	507	408	285	70	93	73	92	637	46	46
0f75fd3c760fa8e21f7feedd34d4b510	ASV118	Bacteria	Proteobacteria	Gammaproteobacteria	Alteromonadales	Marinobacteraceae	Marinobacter	NA	32	12	0	17	22	18	23	83	37	0	26	23	0	0	12	15	0	20	29	18	16	0	12	16	35	63	29	20	0	25	17	39	38	34	0	19	0	14	48	0	16
5e79647e9e8daceb33cdddfcaf483963	ASV774	Bacteria	Proteobacteria	Gammaproteobacteria	Alteromonadales	Alteromonadaceae	NA	NA	0	0	683	355	486	1139	31	24	114	253	0	1499	156	678	201	0	0	37	158	0	0	74	49	0	0	219	0	117	603	1191	253	46	185	0	0	0	0	232	0	47	0
53d2446f3f725adb624523b829920ef0	ASV1686	Bacteria	Proteobacteria	Gammaproteobacteria	Alteromonadales	Alteromonadaceae	NA	NA	212	183	517	188	505	286	120	141	70	0	55	243	210	221	208	119	331	307	145	392	309	484	645	308	85	94	33	67	68	42	387	71	75	52	274	258	315	410	97	234	126
3a736d2c46394df1f72d8098fd3adab7	ASV416	Bacteria	Proteobacteria	Gammaproteobacteria	Alteromonadales	Alteromonadaceae	NA	NA	0	0	0	0	0	0	0	0	0	0	0	0	0	0	0	0	0	0	0	0	0	0	0	0	0	5490	16	0	0	0	0	0	0	0	0	0	0	0	0	0	0
2ce8b94acce0c570a3c84dcc35aab428	ASV338	Bacteria	Proteobacteria	Gammaproteobacteria	Alteromonadales	Alteromonadaceae	NA	NA	0	0	0	0	0	0	34	48	27	0	24	0	0	0	0	0	0	0	0	0	0	0	0	0	0	100	0	30	21	25	0	52	41	0	0	0	0	0	56	0	0
2a6cae1cfbec6de23a145f7c8471a209	ASV279	Bacteria	Proteobacteria	Gammaproteobacteria	Alteromonadales	Colwelliaceae	NA	NA	0	0	0	0	44	0	0	0	0	0	0	0	0	0	0	8	0	18	0	0	11	38	39	0	0	0	0	0	0	0	65	77	0	0	42	18	0	33	0	0	0
36b952816b4c98d26b30736b938a4298	ASV1560	Bacteria	Proteobacteria	Gammaproteobacteria	Alteromonadales	Alteromonadaceae	NA	NA	0	0	0	0	0	0	0	0	0	0	0	0	0	0	0	0	0	0	0	0	0	0	0	0	0	23	0	10	0	0	0	0	0	0	0	0	0	0	0	0	0
c1114e6672b5e1dff0a224945e7fadf8	ASV4210	Bacteria	Proteobacteria	Gammaproteobacteria	Alteromonadales	NA	NA	NA	15	0	0	0	0	0	0	0	0	0	0	3	0	0	0	0	0	0	0	0	8	0	0	0	0	0	0	0	0	0	0	0	0	0	0	0	0	0	0	0	0
79315e20b9464136fcb21a5293af556b	ASV3012	Bacteria	Proteobacteria	Gammaproteobacteria	Alteromonadales	Pseudoalteromonadaceae	Pseudoalteromonas	NA	0	0	0	0	9	0	0	0	0	0	0	0	0	0	0	20	0	7	0	0	0	0	0	0	250	0	0	0	0	0	0	0	0	0	0	15	0	0	0	0	36
e4b490768f9b77014c1464233b06d426	ASV4764	Bacteria	Proteobacteria	Gammaproteobacteria	Alteromonadales	Pseudoalteromonadaceae	Pseudoalteromonas	NA	0	0	0	0	0	0	0	0	0	0	0	0	0	0	0	0	0	0	0	15	0	0	0	13	0	0	0	0	0	0	0	0	0	0	12	0	0	0	0	0	0
6b8889de99738c2d9d6c301e17e14601	ASV838	Bacteria	Proteobacteria	Gammaproteobacteria	Alteromonadales	Shewanellaceae	Psychrobium	uncultured_bacterium	141	88	67	56	150	87	215	342	240	58	80	54	37	57	58	84	74	141	68	85	65	58	229	114	61	584	100	117	46	35	152	202	164	101	56	110	111	69	129	54	47
da79cfe34eb79420c4fa3bf80467d341	ASV4586	Bacteria	Proteobacteria	Gammaproteobacteria	Alteromonadales	Alteromonadaceae	Rheinheimera	NA	0	0	0	0	0	0	120	99	75	42	37	0	0	0	0	0	0	0	27	0	0	0	0	0	0	98	70	56	45	25	0	81	67	51	0	0	0	6	145	0	0
db4a2755afdaf9865c0af5ffb56f8e15	ASV4604	Bacteria	Proteobacteria	Gammaproteobacteria	Alteromonadales	Shewanellaceae	Shewanella	NA	0	0	0	0	0	0	46	0	0	0	0	0	0	0	0	0	0	0	0	0	0	0	0	0	0	0	0	0	0	0	0	0	0	0	0	0	0	0	28	0	0
e5f99284b3c303fd53ba4d2e93c12e7e	ASV4780	Bacteria	Proteobacteria	Gammaproteobacteria	Alteromonadales	Colwelliaceae	Thalassotalea	NA	40	38	13	68	319	2817	20	20	33	7019	0	38	80	137	780	0	25	39	0	0	0	24	23	0	0	1030	13	189	11	2566	49	0	85	2105	50	0	0	179	18	43	0
0e14f021767ad65c3b09083e51e837ea	ASV90	Bacteria	Proteobacteria	Gammaproteobacteria	Alteromonadales	Colwelliaceae	Thalassotalea	uncultured_bacterium	0	0	0	0	0	0	0	0	0	0	0	0	0	0	0	0	0	0	0	0	0	9	0	0	60	0	0	526	0	0	0	0	0	179	662	797	0	52	0	0	0
fb08465847f1607032a30560a83c97e4	ASV5312	Bacteria	Proteobacteria	Gammaproteobacteria	Alteromonadales	Colwelliaceae	Thalassotalea	uncultured_bacterium	85	28	24	0	128	38	0	24	0	0	0	0	0	43	33	85	42	51	35	35	42	47	79	36	36	31	0	0	0	0	111	26	0	0	79	53	77	65	0	0	0
6990a7d54191def1a0fc889bc351ac3c	ASV2752	Bacteria	Proteobacteria	Gammaproteobacteria	Alteromonadales	Colwelliaceae	Thalassotalea	NA	43	0	31	0	49	17	0	0	0	87	0	0	18	0	0	0	37	38	0	30	26	13	19	17	25	82	0	17	0	0	24	0	0	65	83	31	48	32	0	13	18
539b4a4c81c34deb816f2163c289c796	ASV2325	Bacteria	Proteobacteria	Gammaproteobacteria	Alteromonadales	Colwelliaceae	Thalassotalea	NA	15	12	0	0	23	0	0	45	13	107	0	15	0	25	12	0	0	0	18	0	0	0	31	14	0	20	12	0	11	0	0	0	0	26	42	15	0	0	9	0	0
0a9d10e156dc9853b83eb78642907e0d	ASV4	Bacteria	Proteobacteria	Gammaproteobacteria	Alteromonadales	Colwelliaceae	Thalassotalea	uncultured_bacterium	57	0	0	0	65	0	0	0	0	0	0	0	0	32	0	28	0	0	0	12	0	0	44	18	20	0	0	0	0	0	38	0	0	0	37	14	0	44	0	0	18
bf86875cfea395c5d52bb88c27c7c123	ASV4013	Bacteria	Proteobacteria	Gammaproteobacteria	Alteromonadales	Colwelliaceae	Thalassotalea	Thalassotalea_ganghwensis	0	0	0	0	0	0	0	0	0	0	0	0	0	0	0	188	0	0	0	0	0	0	0	0	0	0	0	0	0	0	0	0	0	0	17	0	17	0	0	0	0
1d0e97013abbff782901161f36cd8410	ASV195	Bacteria	Proteobacteria	Gammaproteobacteria	Alteromonadales	Colwelliaceae	Thalassotalea	uncultured_bacterium	0	0	0	61	0	0	0	0	0	0	0	53	0	0	0	0	0	0	0	0	0	0	0	0	0	0	0	0	0	0	0	0	0	0	0	0	0	0	0	0	0
d83499a970513b9f7b7839244cf009da	ASV4557	Bacteria	Proteobacteria	Gammaproteobacteria	Alteromonadales	Colwelliaceae	Thalassotalea	NA	0	0	0	0	0	0	35	0	0	0	0	0	0	0	0	0	0	0	0	0	0	0	0	0	0	0	0	0	0	0	0	0	0	0	0	0	0	0	9	0	0
26b5edc15def9e1a049ebe3b9c085eec	ASV1479	Bacteria	Proteobacteria	Gammaproteobacteria	Alteromonadales	Colwelliaceae	Thalassotalea	NA	0	0	0	0	0	0	0	22	0	0	0	0	0	0	0	0	0	0	0	0	0	0	0	0	0	14	0	0	0	0	0	0	0	0	0	0	0	0	0	0	0
349aa8f6ef33bafc5a251498d31a7521	ASV2224	Bacteria	Proteobacteria	Gammaproteobacteria	Alteromonadales	Colwelliaceae	Thalassotalea	NA	0	0	0	0	0	0	0	0	0	0	0	0	0	0	0	0	0	0	0	0	0	0	0	0	0	0	0	0	0	0	16	0	0	0	0	18	0	0	0	0	0
8da4c17b8fe24211457ac5f57d352af7	ASV1151	Bacteria	Proteobacteria	Gammaproteobacteria	Alteromonadales	Alteromonadaceae	uncultured	bacterium_1D806	0	0	0	0	0	0	64	48	156	12	43	0	0	16	0	0	0	0	24	0	0	0	0	0	0	30	58	69	65	31	0	60	78	23	0	0	0	0	71	0	0
9235ed899783b9704450f7e500f95ac9	ASV2833	Bacteria	Proteobacteria	Gammaproteobacteria	Alteromonadales	Colwelliaceae	uncultured	Colwellia_sp.	31	0	0	0	0	0	0	0	0	0	30	0	0	7	0	15	0	51	0	9	106	0	0	0	24	0	0	0	0	0	0	0	0	17	0	506	10	0	0	0	22
49747689c67e7994be3acd10e10cd03e	ASV3300	Bacteria	Proteobacteria	Gammaproteobacteria	Alteromonadales	uncultured	uncultured	uncultured_bacterium	0	0	0	0	0	82	0	0	0	637	0	0	0	0	0	0	0	0	0	0	0	0	0	0	0	0	0	0	0	73	0	0	0	0	0	0	0	0	0	0	0
c02974dde0a0ba44d025ac033392304c	ASV4215	Bacteria	Proteobacteria	Gammaproteobacteria	Alteromonadales	Pseudoalteromonadaceae	uncultured	NA	36	0	0	0	0	0	0	0	0	0	46	0	0	0	0	0	0	0	0	40	0	0	0	0	0	0	0	0	0	0	0	0	0	0	0	0	0	0	0	0	0
fdb3365217cbaac6c2dd8b64aad40a8c	ASV5350	Bacteria	Proteobacteria	Gammaproteobacteria	Alteromonadales	Alteromonadaceae	uncultured	Catenovulum_sp.	0	0	0	0	0	0	0	0	0	0	0	0	0	0	0	0	0	0	0	0	0	0	0	0	0	0	0	0	0	0	0	0	0	0	0	0	0	0	38	0	0
90c0c0f5d4b504cc19a694bc42c44175	ASV2005	Bacteria	Proteobacteria	Gammaproteobacteria	Alteromonadales	Alteromonadaceae	uncultured	Catenovulum_sp.	0	0	0	0	0	0	0	0	0	0	0	0	0	0	0	0	0	0	0	16	0	0	0	0	12	0	0	0	0	0	0	0	0	0	0	0	0	0	0	0	8
86c00c4d67b65d94020f634e20ad1bbf	ASV1963	Bacteria	Proteobacteria	Gammaproteobacteria	Alteromonadales	Pseudoalteromonadaceae	uncultured	NA	0	0	0	0	0	0	0	0	0	0	0	0	0	35	0	0	0	0	0	0	0	0	0	0	0	0	0	0	0	0	0	0	0	0	0	0	0	0	0	0	0
41d947b86148231cb43219cbdc0d0030	ASV1594	Bacteria	Proteobacteria	Gammaproteobacteria	Alteromonadales	Alteromonadaceae	uncultured	Catenovulum_sp.	0	0	0	0	0	0	0	0	0	0	0	0	0	0	0	0	0	0	0	0	0	0	0	0	30	0	0	0	0	0	0	0	0	0	0	0	0	0	0	0	0
13feb8371c678f1f82c0c5e51262ced5	ASV1392	Bacteria	Proteobacteria	Gammaproteobacteria	Alteromonadales	uncultured	uncultured	uncultured_bacterium	0	0	0	0	0	0	0	0	0	0	0	0	0	0	0	0	0	0	0	0	0	0	0	0	0	0	0	0	0	24	0	0	0	0	0	0	0	0	0	0	0
2ec5ffb12c3e6841fe504fcf75c7138e	ASV378	Bacteria	Proteobacteria	Gammaproteobacteria	Alteromonadales	Alteromonadaceae	uncultured	NA	0	0	0	0	0	0	0	0	0	0	11	0	0	0	0	0	0	0	0	0	0	0	0	0	0	5	0	0	0	0	0	8	0	0	0	0	0	0	0	0	0
af1f95abbc891d8527b5fcc0243ca389	ASV3674	Bacteria	Chloroflexi	Anaerolineae	Anaerolineales	Anaerolineaceae	uncultured	NA	15	0	14	5	6	7	0	0	0	0	0	7	5	0	9	9	0	0	8	20	0	18	33	12	15	0	0	7	16	0	22	0	0	0	0	0	11	12	0	9	6
3eaa35a6232d1500a920ec7c184686d0	ASV512	Bacteria	Chloroflexi	Anaerolineae	Anaerolineales	Anaerolineaceae	uncultured	uncultured_Chloroflexi	0	0	6	0	0	0	14	27	25	0	0	0	0	0	0	0	0	0	0	0	0	0	0	0	0	0	7	0	0	0	0	8	0	0	0	0	0	0	27	0	0
dbf3d4ec4f8a314340264aa06ac5fc43	ASV4616	Bacteria	Chloroflexi	Anaerolineae	Anaerolineales	Anaerolineaceae	uncultured	NA	0	6	0	7	0	0	0	0	0	0	0	9	0	0	0	0	6	0	0	20	0	0	10	0	13	0	0	0	0	0	0	0	0	4	0	0	0	8	0	0	10
3e5482d6b9b9ab530fc3cade143d9422	ASV505	Bacteria	Chloroflexi	Anaerolineae	Anaerolineales	Anaerolineaceae	uncultured	NA	9	0	0	0	0	21	0	0	0	7	0	12	19	0	4	0	0	0	0	0	0	0	0	0	6	0	0	0	0	0	0	0	9	0	0	0	0	0	0	3	0
1ec13db9ea607f2d8637e39413c58382	ASV249	Bacteria	AncK6	AncK6	AncK6	AncK6	AncK6	uncultured_bacterium	15	0	0	0	0	8	0	0	0	0	0	0	0	0	11	10	6	21	0	16	15	4	0	0	6	2	12	4	0	0	3	0	0	10	0	8	0	0	7	0	18
a9d27dfac1d8f2a5d09509f783a4f0c4	ASV3463	Bacteria	Verrucomicrobiota	Verrucomicrobiae	Arctic97B-4_marine_group	Arctic97B-4_marine_group	Arctic97B-4_marine_group	uncultured_bacterium	15	18	11	22	10	15	19	26	10	0	12	13	13	20	17	29	12	28	15	24	13	0	15	20	10	0	16	16	11	0	22	7	16	27	13	40	17	13	5	8	21
a3f621eab6e82badcfd7302c8bb8fcc1	ASV3412	Bacteria	Chloroflexi	Anaerolineae	Ardenticatenales	uncultured	uncultured	NA	23	15	14	0	16	0	0	0	0	0	0	0	19	0	20	9	39	11	0	0	0	19	18	0	0	0	0	6	0	0	31	0	0	0	0	0	211	30	0	0	0
a13bd1792d2ffebcba5101733af5a909	ASV3467	Bacteria	Chloroflexi	Anaerolineae	Ardenticatenales	uncultured	uncultured	NA	0	0	0	0	13	22	0	0	0	0	0	20	35	29	0	0	0	0	0	0	0	21	14	0	0	0	0	0	0	0	0	0	0	0	0	0	0	0	0	0	0
ae18b2d5158dfc51f3e18c0b6e1c0bbc	ASV3661	Bacteria	Chloroflexi	Anaerolineae	Ardenticatenales	uncultured	uncultured	uncultured_bacterium	0	0	0	11	0	8	0	0	0	0	9	0	0	8	0	12	15	25	0	0	13	0	0	12	0	0	0	0	0	0	11	0	0	0	0	14	0	7	0	0	0
c89971831c857f4632f3b93cf6958392	ASV4257	Bacteria	Chloroflexi	Anaerolineae	Ardenticatenales	uncultured	uncultured	uncultured_bacterium	0	0	0	0	16	0	7	0	0	0	0	9	0	0	0	0	0	0	0	0	0	10	0	0	0	0	0	0	22	0	0	0	0	0	0	0	0	0	0	0	0
10f6229554251a46519fb366ef204df4	ASV1360	Bacteria	Chloroflexi	Anaerolineae	Ardenticatenales	uncultured	uncultured	uncultured_bacterium	0	0	8	0	4	0	0	0	7	0	0	7	0	11	0	0	0	0	0	0	0	0	0	0	0	7	0	0	0	0	0	0	0	3	0	0	0	0	0	0	0
859a4d221f53572de77dc1cbf36d093b	ASV2491	Bacteria	Chloroflexi	Anaerolineae	Ardenticatenales	uncultured	uncultured	uncultured_bacterium	0	0	0	0	0	9	0	0	16	0	0	0	0	0	0	0	0	0	0	0	0	0	0	0	0	0	0	0	0	0	0	0	0	0	0	0	0	0	0	0	0
521caefa1e7352a075cd51f0201d744d	ASV2317	Bacteria	Chloroflexi	Anaerolineae	Ardenticatenales	uncultured	uncultured	NA	0	0	0	0	0	0	0	0	0	0	0	0	0	0	0	0	0	0	0	0	0	0	0	0	6	0	0	0	0	0	0	0	0	0	0	0	0	8	0	0	10
530af93a008c18735fd86ec253f52b48	ASV2322	Bacteria	Chloroflexi	Anaerolineae	Ardenticatenales	uncultured	uncultured	uncultured_organism	0	0	0	0	0	0	0	6	0	0	0	0	0	0	0	0	0	0	4	8	0	0	0	0	0	0	0	0	0	0	0	0	0	3	0	2	0	0	0	0	0
5deec17c901734b712a8e6320945ea72	ASV760	Bacteria	Proteobacteria	Gammaproteobacteria	Arenicellales	Arenicellaceae	Arenicella	NA	33	67	109	83	71	43	0	24	32	15	68	142	94	69	58	47	39	66	49	54	61	53	92	277	0	12	130	33	37	0	103	15	14	62	67	72	71	54	27	71	50
a6b93706852b3b4128429ad78f953805	ASV3430	Bacteria	Proteobacteria	Gammaproteobacteria	Arenicellales	Arenicellaceae	Arenicella	uncultured_bacterium	0	0	0	0	0	0	30	50	37	0	44	9	0	0	0	0	24	27	0	0	29	0	0	48	0	23	24	0	0	19	0	0	0	39	37	54	0	0	0	0	0
af0cfab577b914d36f4bd4d53e543a0d	ASV3673	Bacteria	Proteobacteria	Gammaproteobacteria	Arenicellales	Arenicellaceae	Arenicella	uncultured_bacterium	0	0	0	0	0	0	0	0	0	0	0	0	0	0	0	0	0	0	0	21	0	16	62	0	0	0	0	0	143	0	0	0	0	0	0	0	34	165	46	22	0
dcf52e78d2eb206e169a49a4563616ea	ASV4641	Bacteria	Proteobacteria	Gammaproteobacteria	Arenicellales	Arenicellaceae	Arenicella	uncultured_bacterium	0	0	24	0	0	31	0	0	0	0	0	0	120	0	0	0	0	0	0	0	0	0	0	47	0	0	0	84	0	0	55	0	0	0	0	0	0	0	0	26	0
293b01c4d91cb8f43807c7a13ea76a2d	ASV2192	Bacteria	Proteobacteria	Gammaproteobacteria	Arenicellales	Arenicellaceae	Arenicella	NA	32	0	14	0	0	0	0	0	0	10	27	0	0	0	0	20	0	0	0	0	0	0	0	40	32	0	0	0	0	0	0	19	0	0	0	0	0	0	0	0	0
aa1853187f765084b686da24d64b3967	ASV3586	Bacteria	Proteobacteria	Gammaproteobacteria	Arenicellales	Arenicellaceae	Arenicella	uncultured_bacterium	0	0	0	25	0	0	0	0	0	0	0	0	0	0	0	0	0	17	0	0	0	0	0	0	0	0	0	0	0	0	0	0	0	0	0	0	0	0	0	0	0
3704c5b66c53d46b4576cd27713c9402	ASV2650	Bacteria	Proteobacteria	Gammaproteobacteria	Arenicellales	Arenicellaceae	Arenicella	NA	0	0	0	0	0	0	0	0	0	0	0	0	0	0	0	0	0	0	0	0	0	0	0	0	0	0	0	35	0	0	0	0	0	0	0	0	0	0	0	0	0
d18b70b738e6d242fb8eac09d38cf658	ASV4482	Bacteria	Proteobacteria	Gammaproteobacteria	Arenicellales	Arenicellaceae	HTCC5015	uncultured_bacterium	20	30	70	34	60	81	66	79	83	23	0	72	38	54	20	45	44	19	94	45	33	75	72	52	26	125	41	26	51	84	47	56	95	33	28	33	0	56	56	23	28
cf541d091d6a488c22506e5e90a33a47	ASV4386	Bacteria	Proteobacteria	Gammaproteobacteria	Arenicellales	Arenicellaceae	HTCC5015	uncultured_bacterium	0	0	0	0	14	0	16	0	0	0	0	0	25	0	0	0	0	0	24	0	0	12	0	0	0	0	0	0	0	0	26	0	0	0	0	0	0	0	0	0	0
98b95f44e1c7c2f855025e0cac76e037	ASV2070	Bacteria	Proteobacteria	Gammaproteobacteria	Arenicellales	Arenicellaceae	HTCC5015	uncultured_bacterium	0	0	21	0	0	16	0	0	12	0	0	11	0	0	0	14	0	0	0	0	0	0	0	0	0	0	0	0	0	0	0	0	0	0	0	0	0	0	0	0	0
b1febf29e02294ea59341f2808a0d20a	ASV3710	Bacteria	Proteobacteria	Gammaproteobacteria	Arenicellales	Arenicellaceae	HTCC5015	uncultured_bacterium	0	0	0	0	0	0	0	0	0	0	36	0	0	0	0	0	0	0	0	0	0	0	0	0	0	0	0	0	0	0	0	0	0	0	0	0	0	0	0	0	0
c066424f09a56a7c7c7579854c39a043	ASV4238	Bacteria	Proteobacteria	Gammaproteobacteria	Arenicellales	Arenicellaceae	NA	NA	0	0	11	0	0	0	0	0	0	0	0	0	0	18	9	0	0	0	0	5	0	0	0	0	0	0	0	0	0	0	11	0	0	0	0	0	0	0	0	7	0
281f6f01d487550954bf1d5043c21099	ASV2181	Bacteria	Proteobacteria	Gammaproteobacteria	Arenicellales	Arenicellaceae	NA	NA	0	0	0	0	0	0	0	0	0	0	7	0	0	0	0	0	0	0	0	0	0	0	0	0	0	0	8	0	0	0	0	10	0	0	0	0	0	0	0	0	0
23e6fb979466aa53920b1269f802dc23	ASV1465	Bacteria	Proteobacteria	Gammaproteobacteria	Arenicellales	Arenicellaceae	NA	NA	0	0	0	0	0	0	0	0	0	24	0	0	0	0	0	0	0	0	0	0	0	0	0	0	0	0	0	0	0	0	0	0	0	0	0	0	0	0	0	0	0
7089272997bb3288675f5473877a1d7f	ASV3355	Bacteria	Proteobacteria	Gammaproteobacteria	Arenicellales	Arenicellaceae	uncultured	uncultured_bacterium	0	52	0	0	12	25	22	19	28	0	21	0	13	0	22	20	25	17	0	0	23	11	14	39	22	35	64	19	10	19	15	19	28	28	20	19	44	25	18	41	19
cb97a9266098d87309c170a24b6a33f8	ASV4293	Bacteria	Proteobacteria	Gammaproteobacteria	Arenicellales	Arenicellaceae	uncultured	NA	0	0	0	0	0	0	0	0	0	0	0	0	0	0	0	0	0	0	0	0	0	0	0	0	0	0	20	0	0	0	0	0	0	0	0	0	0	0	0	0	0
5cae1516e7c560b2bb8056750f9cd9b9	ASV730	Bacteria	Proteobacteria	Gammaproteobacteria	AT-s2-59	AT-s2-59	AT-s2-59	NA	90	45	96	80	47	57	37	38	12	9	0	54	43	52	58	68	66	187	35	115	95	87	66	71	33	26	0	77	34	34	86	0	0	20	31	33	24	78	31	103	22
f3cac95fc27c7c7128b54aca0f6c32f2	ASV5102	Bacteria	Proteobacteria	Gammaproteobacteria	AT-s2-59	AT-s2-59	AT-s2-59	NA	32	44	30	28	18	0	25	27	25	31	31	0	33	13	25	41	23	69	0	76	52	41	33	34	70	0	30	0	0	15	29	14	12	42	0	31	69	39	24	42	44
1497cf0ee38046edf5a25fe66adcf112	ASV2572	Bacteria	Proteobacteria	Gammaproteobacteria	AT-s2-59	AT-s2-59	AT-s2-59	uncultured_bacterium	0	33	15	0	12	24	27	49	27	24	55	0	36	0	34	26	0	26	25	30	34	19	0	25	46	22	30	30	0	0	0	26	12	37	0	0	22	32	34	26	14
bbc20593c41de13cb38ebd906b6dfca6	ASV3933	Bacteria	Proteobacteria	Gammaproteobacteria	AT-s2-59	AT-s2-59	AT-s2-59	uncultured_bacterium	0	0	0	0	0	0	12	0	9	0	0	0	0	0	0	12	14	18	0	0	0	0	12	0	16	0	0	0	0	0	0	24	0	20	0	10	20	0	0	9	15
3d78ab04c26611cc7a8ef89f53d4b9e2	ASV478	Bacteria	Proteobacteria	Gammaproteobacteria	AT-s2-59	AT-s2-59	AT-s2-59	NA	0	0	0	0	0	0	0	0	0	0	0	0	0	0	0	0	0	0	0	14	0	0	0	0	13	0	0	0	0	0	0	0	0	0	0	0	0	0	0	6	0
2dfcc28bd3b3a75adcb3e0cd494ee0a9	ASV357	Bacteria	Acidobacteriota	AT-s3-28	AT-s3-28	AT-s3-28	AT-s3-28	uncultured_bacterium	13	0	0	0	0	6	0	0	0	6	0	0	9	7	0	10	14	59	0	22	0	0	7	10	16	0	0	0	0	0	0	18	0	0	0	0	22	0	0	14	14
a59c867e9b2fbcda541bcebe3568ae69	ASV3482	Bacteria	Acidobacteriota	AT-s3-28	AT-s3-28	AT-s3-28	AT-s3-28	uncultured_bacterium	11	0	0	0	0	0	0	0	0	0	0	0	0	0	0	0	6	10	0	0	10	0	0	0	0	0	0	0	0	0	0	0	0	0	0	0	0	0	0	0	0
d478ba8a22497fadf13a76e6a3506591	ASV4520	Bacteria	Acidobacteriota	AT-s3-28	AT-s3-28	AT-s3-28	AT-s3-28	uncultured_bacterium	0	0	0	0	0	0	0	0	10	0	0	0	0	0	11	8	0	0	0	0	0	0	0	0	0	0	0	0	0	0	0	0	0	0	0	0	0	0	0	0	0
db7b984187fed0e7a27436f7189104ee	ASV4608	Bacteria	Proteobacteria	Alphaproteobacteria	AT-s3-44	AT-s3-44	AT-s3-44	NA	206	77	53	81	107	27	25	40	37	0	14	43	21	52	43	61	49	146	43	130	43	63	67	85	111	26	22	15	9	0	43	50	20	31	35	47	134	80	35	52	68
d1648719d30fa3cb5e54e44b4e66808e	ASV4566	Bacteria	Proteobacteria	Alphaproteobacteria	AT-s3-44	AT-s3-44	AT-s3-44	NA	10	17	0	15	0	0	24	89	26	0	12	0	0	0	0	0	0	10	13	12	7	0	0	0	14	25	25	20	13	10	0	46	12	50	0	0	0	0	34	8	8
af74c32457ac26261356b66883a848f0	ASV3682	Bacteria	Proteobacteria	Gammaproteobacteria	B2M28	B2M28	B2M28	NA	0	0	0	0	0	0	0	14	0	0	0	0	0	0	0	0	0	0	0	7	7	0	0	0	0	9	0	0	0	0	0	0	0	0	0	0	0	0	0	0	0
dfe28c23fef105479cd17612fc5b42cb	ASV4712	Bacteria	Dependentiae	Babeliae	Babeliales	Babeliaceae	Babeliaceae	uncultured_sediment	0	11	0	9	7	22	0	20	9	0	0	19	13	16	6	12	21	22	7	12	0	13	8	0	15	14	13	0	0	0	25	10	0	4	0	21	16	13	20	12	8
ba23fbd518ec8fb0f49fcff49d95f172	ASV3899	Bacteria	Dependentiae	Babeliae	Babeliales	Babeliaceae	Babeliaceae	NA	0	0	0	0	0	0	0	0	0	0	0	0	0	0	0	0	0	10	0	5	8	0	0	0	0	0	0	0	0	0	17	0	0	0	0	0	0	0	0	0	0
ca144b4693f49db48affd00098814f9f	ASV4271	Bacteria	Dependentiae	Babeliae	Babeliales	Babeliaceae	Babeliaceae	NA	8	0	0	0	0	0	0	0	0	0	0	0	0	0	0	0	0	0	5	0	0	6	0	0	0	0	0	0	0	0	0	0	0	0	0	0	0	0	0	0	0
05e60956948c0ec146eed70c1d1da815	ASV775	Bacteria	Dependentiae	Babeliae	Babeliales	Babeliales	Babeliales	uncultured_bacterium	22	0	0	79	16	148	0	0	0	0	0	0	0	0	0	0	0	28	0	0	9	0	14	0	0	0	0	0	0	0	12	0	0	0	0	0	0	25	0	6	8
ce57729ae9c43cf53e1ff665c5442fb1	ASV4365	Bacteria	Dependentiae	Babeliae	Babeliales	Babeliales	Babeliales	uncultured_bacterium	0	0	0	0	0	0	21	47	4	6	0	0	0	0	0	0	0	0	0	0	0	0	0	0	0	35	9	10	18	13	0	0	25	13	0	0	0	0	7	0	0
1c4c19b665446fb6685c0429358d1121	ASV175	Bacteria	Dependentiae	Babeliae	Babeliales	Babeliales	Babeliales	uncultured_bacterium	0	13	15	6	17	25	0	0	0	0	0	8	0	15	0	9	12	0	0	23	7	15	0	14	5	0	0	0	0	0	4	0	0	0	0	0	0	0	0	8	9
b59cbe61fd91bf7b06dd91ea990aa36e	ASV3801	Bacteria	Dependentiae	Babeliae	Babeliales	Babeliales	Babeliales	uncultured_bacterium	17	8	0	11	0	10	0	0	0	0	0	12	6	9	0	5	0	4	0	0	12	14	0	12	22	0	0	0	0	0	29	0	0	0	0	0	11	0	0	8	9
47b78b4bca2d2c33c6f5053ea2fed8cc	ASV1641	Bacteria	Dependentiae	Babeliae	Babeliales	Babeliales	Babeliales	uncultured_bacterium	0	7	0	0	10	0	0	0	0	0	0	0	0	0	8	0	9	0	0	0	0	0	48	10	0	12	5	0	0	0	0	0	11	4	0	0	0	0	11	0	0
5b231112367c125df187980d653ff2bd	ASV702	Bacteria	Dependentiae	Babeliae	Babeliales	Babeliales	Babeliales	uncultured_bacterium	0	21	0	0	0	0	0	0	0	0	0	0	0	0	0	18	0	51	0	0	0	0	0	12	0	0	0	0	0	0	0	0	0	0	0	0	7	0	0	0	20
2bb2f60793b186f19f47bf9dae199ca8	ASV315	Bacteria	Dependentiae	Babeliae	Babeliales	Babeliales	Babeliales	uncultured_bacterium	0	0	0	0	0	0	14	12	0	3	0	0	0	0	0	0	0	0	0	0	0	0	0	0	0	24	8	3	0	0	0	14	15	0	0	0	0	0	10	0	0
c9a84b52a209165cce86580e4e4f97d2	ASV4102	Bacteria	Dependentiae	Babeliae	Babeliales	Babeliales	Babeliales	uncultured_bacterium	6	0	0	0	0	12	0	0	0	0	0	0	0	0	0	12	6	0	0	0	0	0	0	0	4	0	0	0	0	0	0	0	0	0	0	6	8	26	0	6	0
e46ee179fcc95e81b97f11b2cbc04f6b	ASV4843	Bacteria	Dependentiae	Babeliae	Babeliales	Babeliales	Babeliales	uncultured_bacterium	9	0	0	0	0	7	0	0	0	0	0	0	0	0	0	13	0	0	0	0	0	0	0	0	6	0	0	0	0	0	0	0	0	0	0	0	0	15	0	25	14
f171e591718c7dc8d5e769b8275552fe	ASV5207	Bacteria	Dependentiae	Babeliae	Babeliales	Babeliales	Babeliales	uncultured_bacterium	0	0	0	0	0	0	0	0	0	0	0	0	0	0	0	0	0	0	0	0	21	0	0	0	0	0	0	0	0	0	0	0	0	0	0	0	0	0	0	0	36
00ba13ea97f8731c75f9503822dbfc6e	ASV37	Bacteria	Dependentiae	Babeliae	Babeliales	Babeliales	Babeliales	uncultured_bacterium	0	0	0	0	9	0	0	0	0	0	0	0	0	0	3	0	0	0	0	0	0	0	3	5	3	6	0	0	0	0	0	0	6	6	0	0	0	4	0	3	5
fbdea30ca5d32298c35ef793f1077d49	ASV5317	Bacteria	Dependentiae	Babeliae	Babeliales	Babeliales	Babeliales	uncultured_bacterium	0	0	0	12	0	0	0	0	0	0	0	0	0	0	0	0	0	31	0	8	0	2	0	0	0	0	0	0	0	0	0	0	0	0	0	0	0	0	0	0	0
85b7f9c1ba5f718069861478326c3df3	ASV1955	Bacteria	Dependentiae	Babeliae	Babeliales	Babeliales	Babeliales	uncultured_bacterium	28	0	0	0	0	0	0	0	0	0	0	0	0	0	0	0	0	0	0	0	0	0	0	0	0	0	0	0	0	0	0	0	0	0	0	0	19	0	0	0	4
4eed90c9f2bc66abef48e0aaa9eaa047	ASV651	Bacteria	Dependentiae	Babeliae	Babeliales	Babeliales	Babeliales	uncultured_bacterium	0	0	0	0	11	0	6	0	5	0	0	0	0	0	0	0	0	0	0	0	0	0	0	0	0	0	0	0	0	0	9	12	0	0	0	0	0	0	0	0	0
f9cad5886a0f50577be720e8ece5181b	ASV5156	Bacteria	Dependentiae	Babeliae	Babeliales	Babeliales	Babeliales	uncultured_bacterium	4	0	0	0	3	0	0	0	0	0	0	0	0	0	0	0	0	0	0	12	0	0	0	0	0	0	0	0	0	0	10	0	0	0	0	0	11	0	0	0	0
c8f1268b26d66c9473cb6ee31c046318	ASV4099	Bacteria	Dependentiae	Babeliae	Babeliales	Babeliales	Babeliales	uncultured_bacterium	0	0	0	0	0	0	0	0	0	0	0	0	0	0	0	0	0	0	0	0	0	0	0	0	0	0	20	0	0	0	0	0	0	0	0	0	0	0	0	0	0
c5247e34004bf2d6d3e1585a64d157c0	ASV4223	Bacteria	Dependentiae	Babeliae	Babeliales	NA	NA	NA	16	26	46	14	58	26	0	0	0	0	0	85	51	47	19	24	19	24	13	10	18	37	75	29	40	0	0	0	0	0	153	0	0	0	3	16	23	39	0	12	22
686b4064897184cffcf6427090169b54	ASV2399	Bacteria	Dependentiae	Babeliae	Babeliales	NA	NA	NA	38	5	8	0	38	6	0	0	0	0	0	9	3	0	2	5	16	8	5	5	0	0	26	13	7	13	0	4	0	0	7	0	5	0	28	14	5	6	0	9	0
8d2fecab76d095257244a1cbe10b5008	ASV1133	Bacteria	Dependentiae	Babeliae	Babeliales	NA	NA	NA	0	0	11	0	29	4	0	0	0	0	0	0	0	40	0	0	0	0	0	0	0	56	19	3	0	0	0	0	0	0	9	0	0	0	5	0	0	2	0	0	0
0053f6c1b3ff1c1a71b71bdbdaa46eff	ASV1688	Bacteria	Dependentiae	Babeliae	Babeliales	NA	NA	NA	0	0	17	0	8	0	0	0	0	0	0	14	0	0	0	0	4	0	7	3	0	0	12	7	5	0	0	0	0	0	0	0	0	0	0	0	0	0	0	0	0
c304b3c0c2d09bd5d5e1e2f7b80b8a53	ASV4182	Bacteria	Dependentiae	Babeliae	Babeliales	NA	NA	NA	0	0	4	0	0	0	0	0	0	0	0	0	0	0	0	0	0	0	0	7	0	0	0	0	0	15	0	0	0	0	0	12	10	0	0	0	0	0	0	0	0
a9cfc1f491688ecbadc2c74a4d7941ad	ASV3461	Bacteria	Dependentiae	Babeliae	Babeliales	NA	NA	NA	0	0	0	0	0	0	0	0	0	0	0	0	0	0	0	0	0	0	0	0	0	0	0	0	0	0	0	0	0	0	0	0	0	0	0	0	0	0	0	0	40
e47ce81032cb87fc5c82edfbd5deb944	ASV4845	Bacteria	Dependentiae	Babeliae	Babeliales	NA	NA	NA	0	0	0	0	0	0	0	0	0	0	0	0	0	0	0	0	0	0	25	0	0	8	0	0	0	0	0	0	0	0	0	0	0	0	0	0	0	0	0	0	0
f12a60b46631e3f4b753db2f0cc42f99	ASV5161	Bacteria	Dependentiae	Babeliae	Babeliales	NA	NA	NA	0	0	0	0	0	0	0	0	0	0	0	0	0	0	16	0	0	4	0	10	0	0	0	0	0	0	0	0	0	0	0	0	0	0	0	0	0	0	0	0	0
2c25082789ffd45dc92a6a3b14ffdcac	ASV330	Bacteria	Dependentiae	Babeliae	Babeliales	NA	NA	NA	0	0	0	0	19	0	0	0	0	0	0	0	0	0	0	0	0	0	0	0	0	0	0	5	0	0	0	0	0	0	0	0	0	0	0	0	0	0	0	0	0
3b9a654d9ca64b99c723284a59ea71da	ASV433	Bacteria	Dependentiae	Babeliae	Babeliales	NA	NA	NA	0	0	0	0	0	0	0	0	0	0	0	0	0	0	20	0	0	0	0	0	0	0	0	0	0	0	0	0	0	0	0	0	0	0	0	0	0	0	0	0	0
c65b5d708182ba1d32fbaaf342019531	ASV4150	Bacteria	Dependentiae	Babeliae	Babeliales	UBA12409	UBA12409	uncultured_bacterium	0	0	11	0	10	0	0	0	0	0	0	0	0	0	0	0	0	0	0	0	0	0	0	0	5	0	0	0	0	0	0	0	0	0	0	0	10	0	0	0	0
a660c2a27739725e44329e131aba5171	ASV3525	Bacteria	Dependentiae	Babeliae	Babeliales	UBA12411	UBA12411	uncultured_deep-sea	35	108	190	8	201	42	69	0	52	0	6	217	19	147	15	36	54	40	209	139	21	335	150	123	56	26	15	21	11	0	82	12	10	6	58	60	33	24	14	27	34
f39facf63c0547a1264aa288e035efe1	ASV5181	Bacteria	Dependentiae	Babeliae	Babeliales	UBA12411	UBA12411	NA	0	0	0	0	0	0	0	0	4	0	0	0	0	0	0	0	0	0	0	0	0	0	0	0	0	0	0	0	0	0	0	0	0	0	0	0	0	0	44	0	0
92a14af1c8f968d03feda3479868d518	ASV2023	Bacteria	Dependentiae	Babeliae	Babeliales	Vermiphilaceae	Vermiphilaceae	uncultured_bacterium	44	47	69	23	67	60	47	63	50	15	37	55	31	36	21	37	83	89	32	93	25	39	31	77	129	57	51	18	11	39	83	55	53	50	44	42	146	86	112	54	49
45168d977f00e4f22041d0fce1c2d1af	ASV2945	Bacteria	Dependentiae	Babeliae	Babeliales	Vermiphilaceae	Vermiphilaceae	uncultured_bacterium	5	38	17	5	125	6	0	0	0	0	0	16	9	17	0	0	0	0	0	0	0	10	8	82	49	0	0	0	0	0	30	0	0	0	0	6	0	0	0	0	24
d86d148f562fe42791dd847766870466	ASV4505	Bacteria	Dependentiae	Babeliae	Babeliales	Vermiphilaceae	Vermiphilaceae	uncultured_bacterium	0	2	30	9	0	0	0	0	0	0	0	2	0	0	18	9	0	62	0	0	8	0	4	0	0	0	0	0	0	0	0	0	0	0	0	0	71	7	0	0	39
18a3d760c22d6ca23ab7eff2119fb7d2	ASV1420	Bacteria	Dependentiae	Babeliae	Babeliales	Vermiphilaceae	Vermiphilaceae	uncultured_bacterium	0	0	0	0	0	0	0	0	64	0	0	0	0	0	0	0	0	0	0	0	0	0	0	0	0	0	0	0	0	0	0	0	0	0	0	0	0	0	0	0	0
86afa43670c14ada4fe78bbd167bde82	ASV1961	Bacteria	Dependentiae	Babeliae	Babeliales	Vermiphilaceae	Vermiphilaceae	uncultured_bacterium	0	0	0	0	0	0	0	0	7	0	0	0	0	0	0	0	0	0	0	0	0	0	0	0	0	0	40	0	0	0	0	0	7	0	0	0	0	0	0	0	0
ad33e2492adf061cd7da96b1601fae03	ASV3645	Bacteria	Dependentiae	Babeliae	Babeliales	Vermiphilaceae	Vermiphilaceae	uncultured_bacterium	0	0	0	0	0	0	0	0	0	0	7	0	0	0	0	0	0	0	5	0	0	0	0	0	0	0	10	0	0	0	0	0	0	5	0	0	0	0	0	20	0
c83083f9c28f9f9fa10e5b5f94782225	ASV4242	Bacteria	Dependentiae	Babeliae	Babeliales	Vermiphilaceae	Vermiphilaceae	uncultured_bacterium	0	0	0	0	0	0	0	0	0	0	4	0	0	0	0	0	0	8	8	0	4	0	0	0	3	0	0	0	0	0	0	0	0	0	0	0	0	0	0	0	0
0e59cb6b1df2ea46f73acc09e76f7811	ASV91	Bacteria	Dependentiae	Babeliae	Babeliales	Vermiphilaceae	Vermiphilaceae	uncultured_bacterium	0	0	0	0	0	3	0	0	0	0	0	0	5	0	0	0	0	0	0	0	0	0	0	0	0	0	0	0	2	0	0	0	0	0	0	0	12	0	0	0	0
d2f034f3b8530f26df3f44577faa5b25	ASV4418	Bacteria	Firmicutes	Bacilli	Bacillales	Bacillaceae	Bacillus	NA	0	0	0	0	0	0	0	0	0	0	0	7	0	0	0	0	0	13	0	0	0	0	0	0	0	0	0	0	0	0	0	0	0	0	0	0	11	0	0	0	0
7eadf13e777e62dceac74a4797cc550c	ASV1034	Bacteria	Firmicutes	Bacilli	Bacillales	Bacillaceae	NA	NA	79	116	147	92	106	123	75	121	87	41	139	71	96	105	84	125	177	149	80	109	188	143	109	177	121	79	91	49	50	35	108	82	62	137	93	179	115	169	102	88	81
8b68b15f5d3daf6ac2dc4b5634d42d9a	ASV1098	Bacteria	Firmicutes	Bacilli	Bacillales	Salisediminibacteriaceae	Salipaludibacillus	NA	0	0	0	0	0	0	12	0	0	0	0	0	0	0	0	0	0	0	0	0	0	0	35	0	0	0	0	0	0	0	0	0	0	0	0	0	0	0	0	0	0
38255ead76cea95cb0e9c5516fc4b727	ASV2932	Bacteria	Myxococcota	bacteriap25	bacteriap25	bacteriap25	bacteriap25	uncultured_organism	0	0	0	0	0	0	16	4	0	0	0	0	0	0	0	0	0	0	0	0	0	0	0	0	0	0	0	50	0	0	0	0	0	0	0	0	0	0	3	0	0
18d6c5f50a4e51149b8a896fa2954e32	ASV1424	Bacteria	Bdellovibrionota	Bdellovibrionia	Bacteriovoracales	Bacteriovoracaceae	Bacteriovoracaceae	uncultured_delta	0	0	0	0	4	8	0	0	0	0	0	30	4	0	0	0	16	0	3	0	0	0	16	22	0	0	0	0	0	0	0	0	0	0	0	0	0	13	0	0	0
eb455b051af3866419ceb93a50bb3c6c	ASV4965	Bacteria	Bdellovibrionota	Bdellovibrionia	Bacteriovoracales	Bacteriovoracaceae	Bacteriovoracaceae	uncultured_bacterium	0	0	0	0	0	0	0	0	0	0	0	0	0	0	0	9	7	9	0	0	0	0	0	0	0	0	0	0	0	0	0	0	0	0	0	0	0	0	0	0	7
1746a7e12365f9750fcbf5b63235774d	ASV2585	Bacteria	Bdellovibrionota	Bdellovibrionia	Bacteriovoracales	Bacteriovoracaceae	Halobacteriovorax	Bacteriovorax_sp.	0	0	0	0	0	0	0	0	0	215	0	0	0	0	0	0	0	0	0	0	0	0	0	0	0	0	0	0	0	107	0	0	0	0	0	0	0	0	0	0	0
046fc3c225a7bed440110791cd4a43e5	ASV1639	Bacteria	Bdellovibrionota	Bdellovibrionia	Bacteriovoracales	Bacteriovoracaceae	Halobacteriovorax	uncultured_Bdellovibrio	0	5	0	0	0	0	0	0	0	0	0	0	0	0	9	9	0	0	0	0	0	0	0	0	0	0	0	0	0	0	0	0	0	0	0	0	0	0	20	0	0
253ef89f0f455cda08cc80ebad11665f	ASV2166	Bacteria	Bdellovibrionota	Bdellovibrionia	Bacteriovoracales	Bacteriovoracaceae	Halobacteriovorax	Halobacteriovorax_sp.	0	0	0	0	0	0	0	0	0	0	0	0	0	0	0	0	0	0	0	0	0	0	0	0	0	0	0	0	0	0	0	0	0	0	0	0	0	0	40	0	0
7318bb825a77aee5f3516415d8c7f37f	ASV2762	Bacteria	Bdellovibrionota	Bdellovibrionia	Bacteriovoracales	Bacteriovoracaceae	Halobacteriovorax	uncultured_bacterium	0	0	0	0	0	0	0	0	0	0	0	0	0	0	0	0	0	0	0	0	0	0	4	0	0	0	0	0	0	24	4	0	0	0	0	0	0	0	0	0	0
f5483206e40b32116083caceb502a501	ASV5259	Bacteria	Bdellovibrionota	Bdellovibrionia	Bacteriovoracales	Bacteriovoracaceae	Halobacteriovorax	uncultured_bacterium	0	0	0	0	0	0	0	0	0	0	0	0	0	0	0	0	0	0	0	0	0	0	0	0	0	0	0	0	0	0	12	0	11	0	0	0	0	0	0	0	0
f712e7ef8ea9635645b17e484d58fc62	ASV5222	Bacteria	Bdellovibrionota	Bdellovibrionia	Bacteriovoracales	Bacteriovoracaceae	Halobacteriovorax	uncultured_Bdellovibrio	0	0	0	0	0	0	0	0	0	0	8	0	0	0	0	0	0	0	0	0	0	0	0	0	0	0	0	4	0	0	0	8	0	0	0	0	0	0	0	0	0
380396d8b9fc7ae94f79c3834b8077c6	ASV3108	Bacteria	Bdellovibrionota	Bdellovibrionia	Bacteriovoracales	Bacteriovoracaceae	NA	NA	13	0	23	8	0	0	28	59	20	10	16	15	0	0	0	24	11	11	24	0	0	0	0	0	0	16	12	14	0	0	9	52	26	47	0	16	0	0	39	0	0
63d1c6232c53fe3e612fc1951cac53f2	ASV1760	Bacteria	Bdellovibrionota	Bdellovibrionia	Bacteriovoracales	Bacteriovoracaceae	NA	NA	0	0	0	0	23	0	36	27	28	0	4	7	0	0	12	0	0	15	13	0	0	0	96	0	0	0	0	27	0	0	29	0	31	0	0	9	0	0	24	0	23
a7df7f36e183b14734b8026bced3c978	ASV3441	Bacteria	Bdellovibrionota	Bdellovibrionia	Bacteriovoracales	Bacteriovoracaceae	NA	NA	8	0	0	9	0	0	0	0	0	0	0	0	0	0	0	0	14	15	0	15	0	0	10	0	7	0	0	0	0	0	0	0	4	0	0	20	0	0	0	0	6
112275bd0b0de713839a6791ebe590d5	ASV3066	Bacteria	Bdellovibrionota	Bdellovibrionia	Bacteriovoracales	Bacteriovoracaceae	NA	NA	0	0	0	0	0	0	0	0	9	0	0	0	0	0	0	0	0	0	0	0	0	0	0	0	0	14	0	0	0	26	0	0	13	0	0	0	0	0	0	0	0
f2ff881c003731e331a8977004c11ab9	ASV5095	Bacteria	Bdellovibrionota	Bdellovibrionia	Bacteriovoracales	Bacteriovoracaceae	NA	NA	0	0	0	0	16	12	0	0	0	0	0	0	0	0	17	0	0	0	0	0	0	0	0	0	0	0	0	0	0	0	0	0	10	0	0	0	0	0	0	0	0
0b462c7e8dcc3f67f0ecf6f9e8691841	ASV33	Bacteria	Bdellovibrionota	Bdellovibrionia	Bacteriovoracales	Bacteriovoracaceae	NA	NA	0	0	0	0	0	14	0	0	0	0	0	0	0	0	0	0	7	0	0	0	0	0	0	0	0	0	0	0	0	0	0	0	0	0	18	8	0	0	12	0	0
1b5fd483af696e0f935f6ecf8c6661e0	ASV154	Bacteria	Bdellovibrionota	Bdellovibrionia	Bacteriovoracales	Bacteriovoracaceae	NA	NA	4	8	0	0	0	0	0	0	0	0	0	0	12	0	0	12	0	0	0	3	0	0	0	0	0	0	0	0	0	0	0	0	0	0	0	0	0	3	0	0	0
57c14a423236096efb3311859503272c	ASV1714	Bacteria	Bdellovibrionota	Bdellovibrionia	Bacteriovoracales	Bacteriovoracaceae	NA	NA	0	0	0	9	0	0	13	0	0	0	9	0	0	0	0	0	0	0	0	0	0	0	0	0	0	0	0	6	0	0	0	0	0	8	0	0	0	0	0	0	0
c703eb345a48e1b95983dd0fa05c2fdb	ASV4201	Bacteria	Bdellovibrionota	Bdellovibrionia	Bacteriovoracales	Bacteriovoracaceae	NA	NA	0	0	0	0	0	0	0	0	0	0	0	0	0	0	0	0	7	0	0	0	0	0	0	0	0	0	0	0	0	0	0	0	0	0	0	22	0	0	9	0	0
a573a5201da4aafee5a6b95d36ac3292	ASV3521	Bacteria	Bdellovibrionota	Bdellovibrionia	Bacteriovoracales	Bacteriovoracaceae	NA	NA	0	0	14	0	0	0	0	0	0	0	0	0	7	0	12	0	0	0	0	0	0	0	0	0	0	0	0	0	0	0	0	0	0	0	0	0	0	0	0	4	0
3acaf76eb31c2137ec97e4b3ec6cf9e0	ASV424	Bacteria	Bdellovibrionota	Bdellovibrionia	Bacteriovoracales	Bacteriovoracaceae	NA	NA	0	0	0	0	0	0	0	0	0	0	0	0	0	0	0	0	0	0	0	0	0	0	0	0	0	0	0	0	0	0	0	0	0	0	22	0	0	0	0	0	0
35faa62669f763d3fdbb2224d8146f15	ASV1556	Bacteria	Bdellovibrionota	Bdellovibrionia	Bacteriovoracales	Bacteriovoracaceae	Peredibacter	NA	46	34	82	41	46	36	267	669	554	127	193	137	45	18	21	52	40	92	128	53	33	45	51	0	71	646	286	268	95	90	47	745	396	446	16	108	92	53	728	32	112
4d9eacc7b5426497963c33e6379ed7b7	ASV604	Bacteria	Bdellovibrionota	Bdellovibrionia	Bacteriovoracales	Bacteriovoracaceae	Peredibacter	NA	36	0	0	41	9	0	45	12	0	0	32	20	49	0	44	20	23	38	18	27	0	0	0	34	0	0	0	28	0	0	0	0	0	16	0	39	0	0	27	46	0
4b907573db4199df3e4f2caa37141bf1	ASV567	Bacteria	Bdellovibrionota	Bdellovibrionia	Bacteriovoracales	Bacteriovoracaceae	Peredibacter	uncultured_delta	24	0	18	16	92	0	0	13	0	0	0	15	6	0	0	10	0	43	7	26	19	0	13	16	13	0	0	0	0	0	29	0	0	0	12	14	52	19	0	0	0
98aa4d3108bd2b9a1dc692155305c9c9	ASV2069	Bacteria	Bdellovibrionota	Bdellovibrionia	Bacteriovoracales	Bacteriovoracaceae	Peredibacter	uncultured_bacterium	55	48	0	23	0	0	0	0	0	0	0	0	0	0	37	62	0	0	0	18	19	19	0	0	19	0	0	0	0	0	0	0	0	0	0	0	0	33	0	36	29
293504152f938030119c89b37292218a	ASV3321	Bacteria	Bdellovibrionota	Bdellovibrionia	Bacteriovoracales	Bacteriovoracaceae	Peredibacter	uncultured_bacterium	20	0	0	0	0	0	0	0	0	0	0	0	0	11	18	16	21	0	0	0	35	0	0	0	21	0	0	0	0	0	9	0	0	0	15	26	18	18	0	0	0
94bd7bef6adf06bf9e2648a399512ead	ASV2038	Bacteria	Bdellovibrionota	Bdellovibrionia	Bacteriovoracales	Bacteriovoracaceae	Peredibacter	NA	0	0	0	0	0	0	0	0	0	55	0	0	0	0	0	0	0	0	0	0	0	0	0	0	0	0	0	0	0	72	0	28	47	0	0	0	0	0	0	0	0
747fe1b3a5545a14804cf3be780dd759	ASV2440	Bacteria	Bdellovibrionota	Bdellovibrionia	Bacteriovoracales	Bacteriovoracaceae	Peredibacter	NA	0	0	0	0	6	11	9	21	9	0	9	0	0	0	0	0	5	8	3	6	0	0	0	7	0	0	0	0	0	0	0	3	15	0	6	9	0	0	8	0	0
a689107690b2f110e49ff09afe91af06	ASV3576	Bacteria	Bdellovibrionota	Bdellovibrionia	Bacteriovoracales	Bacteriovoracaceae	Peredibacter	uncultured_Peredibacter	0	0	0	0	0	0	0	0	0	0	0	0	0	0	33	0	0	0	0	0	0	0	0	0	0	0	0	0	0	0	0	0	0	0	0	93	0	0	0	0	0
f81c5b528bf27be4124f0f06f41c1137	ASV5193	Bacteria	Bdellovibrionota	Bdellovibrionia	Bacteriovoracales	Bacteriovoracaceae	Peredibacter	uncultured_bacterium	0	0	20	13	16	21	0	0	0	0	0	16	0	22	0	0	0	0	0	0	0	0	0	0	0	0	0	0	0	0	12	0	0	0	0	0	0	0	0	0	0
fc328cc7db8719dd354dd47fafeeb01c	ASV5326	Bacteria	Bdellovibrionota	Bdellovibrionia	Bacteriovoracales	Bacteriovoracaceae	Peredibacter	NA	0	0	0	0	14	0	0	7	0	0	0	0	0	0	0	0	0	0	0	0	0	0	0	0	0	22	0	0	33	0	0	0	15	0	0	0	0	0	0	0	0
6723da9d0bd2345e91eec77d7082b428	ASV2742	Bacteria	Bdellovibrionota	Bdellovibrionia	Bacteriovoracales	Bacteriovoracaceae	Peredibacter	uncultured_organism	27	0	0	0	0	0	0	0	0	0	0	0	0	0	0	6	0	16	0	15	12	0	0	9	3	0	0	0	0	0	0	0	0	0	0	0	0	0	0	0	10
4b4835519f7acdd7966977ee27a4534f	ASV569	Bacteria	Bdellovibrionota	Bdellovibrionia	Bacteriovoracales	Bacteriovoracaceae	Peredibacter	uncultured_delta	0	0	0	0	0	0	0	0	0	0	0	0	0	0	0	0	0	0	0	0	0	0	0	0	0	0	0	0	4	85	0	0	0	0	0	0	0	0	0	0	0
cd389c6c6491553a03c6c30260a588b8	ASV4336	Bacteria	Bdellovibrionota	Bdellovibrionia	Bacteriovoracales	Bacteriovoracaceae	Peredibacter	uncultured_bacterium	0	0	6	0	0	0	0	0	0	0	0	0	0	5	6	0	6	0	0	6	0	0	0	0	0	0	0	0	0	0	5	0	0	0	20	16	6	0	7	0	0
45ec3633158d5049567af68a354f124a	ASV1630	Bacteria	Bdellovibrionota	Bdellovibrionia	Bacteriovoracales	Bacteriovoracaceae	Peredibacter	uncultured_Bacteriovorax	0	0	0	0	0	0	0	0	0	0	0	0	0	20	0	0	0	0	0	0	0	0	0	0	0	16	0	0	0	0	0	0	0	0	41	0	0	0	0	0	0
bbe99499a39158712b6753bfe61b2fe2	ASV3936	Bacteria	Bdellovibrionota	Bdellovibrionia	Bacteriovoracales	Bacteriovoracaceae	Peredibacter	uncultured_Bacteriovorax	0	0	0	0	18	0	0	30	17	0	0	0	0	0	0	0	0	0	0	0	0	0	0	0	0	0	0	0	0	0	0	11	0	0	0	0	0	0	0	0	0
bed20473b86d2c614b8dbd3e44bca55e	ASV4003	Bacteria	Bdellovibrionota	Bdellovibrionia	Bacteriovoracales	Bacteriovoracaceae	Peredibacter	uncultured_marine	9	0	0	0	5	0	12	0	0	0	0	0	0	0	0	0	0	0	0	0	0	0	0	0	0	0	0	0	0	47	0	0	0	0	0	0	0	0	0	0	0
94a7266477e02ed6c6b4914545274e44	ASV2037	Bacteria	Bdellovibrionota	Bdellovibrionia	Bacteriovoracales	Bacteriovoracaceae	Peredibacter	NA	0	0	23	0	11	6	0	0	0	0	0	13	0	0	0	0	0	0	0	0	0	0	16	0	0	0	0	0	0	0	0	0	0	0	0	0	0	0	0	0	0
8eb571cfb6ab370d0029733f802943fc	ASV1180	Bacteria	Bdellovibrionota	Bdellovibrionia	Bacteriovoracales	Bacteriovoracaceae	Peredibacter	NA	0	0	0	0	0	0	0	0	0	0	0	0	0	0	0	0	0	0	0	0	0	0	0	0	0	0	0	0	0	0	0	0	0	0	0	63	0	0	0	0	0
c983510c32c6135c43f8e63a2eb05711	ASV4253	Bacteria	Bdellovibrionota	Bdellovibrionia	Bacteriovoracales	Bacteriovoracaceae	Peredibacter	NA	0	0	0	0	0	0	0	0	0	0	0	22	0	7	0	0	0	0	0	0	0	0	0	0	0	0	0	0	22	0	8	0	0	0	0	0	0	0	0	0	0
e9b150cd4e7666e3ae7ff81e081f674c	ASV4815	Bacteria	Bdellovibrionota	Bdellovibrionia	Bacteriovoracales	Bacteriovoracaceae	Peredibacter	uncultured_bacterium	48	0	0	0	0	0	0	0	0	0	0	0	0	0	0	0	0	0	0	0	0	0	0	0	0	0	0	0	0	0	0	0	0	0	0	0	10	0	0	0	0
2e57e677a5eccb8fac8c959c457f182a	ASV364	Bacteria	Bdellovibrionota	Bdellovibrionia	Bacteriovoracales	Bacteriovoracaceae	Peredibacter	uncultured_Bacteriovorax	0	0	0	0	0	0	0	0	0	0	0	0	0	0	0	0	0	0	0	25	5	0	0	0	0	0	0	0	0	0	0	0	0	0	0	0	0	6	0	0	21
1bb08afafb7e790e98fea48c8bb41da5	ASV167	Bacteria	Bdellovibrionota	Bdellovibrionia	Bacteriovoracales	Bacteriovoracaceae	Peredibacter	NA	0	0	0	6	0	0	0	0	0	0	0	0	0	0	0	0	4	0	0	3	0	0	5	6	6	0	0	0	0	0	0	0	0	0	18	0	6	0	0	0	0
b576e54742d573873defcd1bbffc53bc	ASV3837	Bacteria	Bdellovibrionota	Bdellovibrionia	Bacteriovoracales	Bacteriovoracaceae	Peredibacter	NA	0	0	0	0	0	0	0	0	0	0	0	0	0	0	0	0	0	0	0	0	0	0	0	0	0	19	0	0	0	0	0	0	0	0	0	0	0	33	0	0	0
529e9b4c5ddea56346022545aae19b72	ASV2321	Bacteria	Bdellovibrionota	Bdellovibrionia	Bacteriovoracales	Bacteriovoracaceae	Peredibacter	NA	0	0	0	0	0	0	0	0	0	0	0	0	0	0	0	0	0	0	0	0	0	0	0	0	0	50	0	0	0	0	0	0	0	0	0	0	0	0	0	0	0
4e252511679c83cf34e1a166a2853431	ASV641	Bacteria	Bdellovibrionota	Bdellovibrionia	Bacteriovoracales	Bacteriovoracaceae	Peredibacter	NA	0	0	0	0	0	0	0	0	23	0	0	0	0	10	0	0	0	0	0	0	0	0	0	0	0	0	0	0	0	0	0	0	15	0	0	0	0	0	0	0	0
9c6a7094a60c88623b4757dfb1ca44f9	ASV1259	Bacteria	Bdellovibrionota	Bdellovibrionia	Bacteriovoracales	Bacteriovoracaceae	Peredibacter	NA	0	0	0	0	0	0	0	0	0	0	0	0	0	0	0	0	0	0	0	0	0	0	0	0	0	0	0	32	0	14	0	0	0	0	0	0	0	0	0	0	0
6dde7d1337b16fb50294bd84dc214174	ASV886	Bacteria	Bdellovibrionota	Bdellovibrionia	Bacteriovoracales	Bacteriovoracaceae	Peredibacter	NA	0	0	0	0	0	0	0	0	0	0	0	0	0	0	0	0	0	0	0	0	0	0	0	12	0	0	9	0	0	0	0	0	0	14	0	0	0	0	0	0	10
cfa40dba5b0e072275ec48d74ed25deb	ASV4389	Bacteria	Bdellovibrionota	Bdellovibrionia	Bacteriovoracales	Bacteriovoracaceae	Peredibacter	NA	0	0	0	0	0	0	0	0	0	0	0	0	0	0	0	0	0	0	0	0	0	0	0	0	0	0	0	17	0	27	0	0	0	0	0	0	0	0	0	0	0
d76787745add79539655ce14339426ff	ASV4570	Bacteria	Bdellovibrionota	Bdellovibrionia	Bacteriovoracales	Bacteriovoracaceae	Peredibacter	uncultured_Bacteriovorax	0	0	0	0	0	0	0	0	0	0	0	0	0	0	0	0	0	0	0	0	0	0	0	0	0	0	0	0	0	43	0	0	0	0	0	0	0	0	0	0	0
633f0071c40441520c9b1d41132ebabb	ASV2374	Bacteria	Bdellovibrionota	Bdellovibrionia	Bacteriovoracales	Bacteriovoracaceae	Peredibacter	uncultured_bacterium	0	0	10	0	0	0	0	0	0	0	0	0	0	0	0	0	0	0	0	25	0	0	0	0	0	0	0	0	0	0	0	0	0	0	0	0	0	0	0	0	7
216a370869405170fc39d205d671d804	ASV2154	Bacteria	Bdellovibrionota	Bdellovibrionia	Bacteriovoracales	Bacteriovoracaceae	Peredibacter	uncultured_Bacteriovorax	0	0	0	0	0	0	0	0	0	0	0	0	0	0	0	0	0	0	0	0	0	0	0	0	0	0	0	39	0	0	0	0	0	0	0	0	0	0	0	0	0
df4a3165d98860db96019835cc7b0e23	ASV4693	Bacteria	Bdellovibrionota	Bdellovibrionia	Bacteriovoracales	Bacteriovoracaceae	Peredibacter	uncultured_Peredibacter	0	0	0	0	0	0	0	0	0	0	0	0	0	0	0	0	0	0	0	0	0	39	0	0	0	0	0	0	0	0	0	0	0	0	0	0	0	0	0	0	0
01acaf8cc5d7df25b1ff14dc3e9823c7	ASV147	Bacteria	Bdellovibrionota	Bdellovibrionia	Bacteriovoracales	Bacteriovoracaceae	Peredibacter	uncultured_organism	0	0	0	0	0	0	0	0	0	0	0	0	0	0	0	0	0	0	0	0	0	0	0	0	0	0	0	0	0	0	0	0	0	0	0	0	0	0	0	0	0
1b6e599e0e56b00183b883025e37698e	ASV155	Bacteria	Bdellovibrionota	Bdellovibrionia	Bacteriovoracales	Bacteriovoracaceae	Peredibacter	NA	0	0	0	0	0	0	0	0	0	3	0	0	0	0	0	0	0	0	0	0	0	0	0	0	0	0	0	0	34	0	0	0	0	0	0	0	0	0	0	0	0
5dc2f2d6055e12f7db50f48a5408395b	ASV755	Bacteria	Bdellovibrionota	Bdellovibrionia	Bacteriovoracales	Bacteriovoracaceae	Peredibacter	uncultured_bacterium	0	0	0	0	0	0	24	0	0	0	0	0	0	0	0	0	0	0	0	0	0	0	0	0	0	0	0	0	0	0	0	13	0	0	0	0	0	0	0	0	0
82e3ddfbb40f84f3e1632c426047a304	ASV1929	Bacteria	Bdellovibrionota	Bdellovibrionia	Bacteriovoracales	Bacteriovoracaceae	Peredibacter	uncultured_organism	0	0	0	0	11	0	0	0	0	0	0	0	0	0	6	0	0	0	0	0	12	0	0	0	0	0	0	0	0	0	0	0	0	0	0	0	0	8	0	0	0
4a680121085a7073acdf50adfc2fe9ab	ASV541	Bacteria	Bdellovibrionota	Bdellovibrionia	Bacteriovoracales	Bacteriovoracaceae	Peredibacter	uncultured_Bacteriovorax	0	0	0	16	0	0	0	0	0	0	0	0	0	0	0	0	0	0	0	0	0	0	0	0	0	0	0	0	0	20	0	0	0	0	0	0	0	0	0	0	0
b5a1768bc74b60db0e44858a1aa8ab82	ASV3729	Bacteria	Bdellovibrionota	Bdellovibrionia	Bacteriovoracales	Bacteriovoracaceae	Peredibacter	NA	0	0	0	0	0	0	0	0	0	0	0	0	0	0	0	0	0	0	0	0	0	0	0	0	0	0	0	0	0	0	0	0	0	0	0	0	0	0	0	0	0
ce29738849bcc49f152e4acc01fc0f9f	ASV4366	Bacteria	Bdellovibrionota	Bdellovibrionia	Bacteriovoracales	Bacteriovoracaceae	Peredibacter	uncultured_Bacteriovorax	0	0	0	0	0	0	0	0	0	0	0	0	0	0	0	0	0	0	0	0	0	0	0	0	0	0	0	0	0	0	0	0	0	0	0	0	0	0	0	0	0
55341e7f3f9216a612878568af20a592	ASV2971	Bacteria	Bdellovibrionota	Bdellovibrionia	Bacteriovoracales	Bacteriovoracaceae	Peredibacter	uncultured_bacterium	0	0	0	0	18	0	0	0	0	0	0	8	6	0	0	0	0	0	0	0	0	0	0	0	0	0	0	0	0	0	0	0	0	0	0	0	0	0	0	0	0
356bfb94f279d3b4fc1832cbbf4d7d0a	ASV2232	Bacteria	Bdellovibrionota	Bdellovibrionia	Bacteriovoracales	Bacteriovoracaceae	Peredibacter	NA	0	0	0	0	9	0	0	0	0	0	0	4	0	0	0	0	0	0	0	0	0	3	7	0	0	0	0	0	0	0	0	0	0	0	8	0	0	0	0	0	0
2724e8d15541b69173718ff56e53e551	ASV2618	Bacteria	Bdellovibrionota	Bdellovibrionia	Bacteriovoracales	Bacteriovoracaceae	Peredibacter	NA	0	0	0	0	0	0	0	10	0	0	0	0	0	0	0	0	0	0	0	0	0	0	0	0	0	0	0	4	0	0	0	7	0	4	0	0	0	0	5	0	0
87b709ffbe6a598a23346b26357f5336	ASV1974	Bacteria	Bdellovibrionota	Bdellovibrionia	Bacteriovoracales	Bacteriovoracaceae	Peredibacter	uncultured_bacterium	0	0	0	0	0	0	0	0	0	0	0	0	8	0	0	0	0	0	0	0	0	0	0	0	0	0	0	22	0	0	0	0	0	0	0	0	0	0	0	0	0
a218a8a81eedfc9188e71c633bbeff86	ASV3510	Bacteria	Bdellovibrionota	Bdellovibrionia	Bacteriovoracales	Bacteriovoracaceae	Peredibacter	uncultured_Peredibacter	0	0	0	0	4	0	0	0	0	0	0	24	0	0	0	0	0	0	0	0	0	0	0	0	0	0	0	0	0	0	0	0	0	0	0	0	0	0	0	0	0
abc7d2dff5eeb492b2fbf292fac97257	ASV3610	Bacteria	Bdellovibrionota	Bdellovibrionia	Bacteriovoracales	Bacteriovoracaceae	Peredibacter	uncultured_bacterium	0	0	0	0	10	0	0	0	0	0	0	0	0	0	0	0	0	0	4	0	0	0	0	0	0	0	0	0	0	0	0	0	0	0	0	0	0	0	0	0	0
db0e77f39982b0b462cc08b4427df7db	ASV4601	Bacteria	Bdellovibrionota	Bdellovibrionia	Bacteriovoracales	Bacteriovoracaceae	Peredibacter	uncultured_marine	0	0	0	0	0	0	0	0	0	0	0	0	0	0	0	0	0	0	0	0	0	0	0	0	0	0	0	27	0	0	0	0	0	0	0	0	0	0	0	0	0
47e1c1d40177e0eeac9db3b7769e05d4	ASV1644	Bacteria	Bdellovibrionota	Bdellovibrionia	Bacteriovoracales	Bacteriovoracaceae	Peredibacter	uncultured_delta	0	0	0	0	0	0	0	0	0	0	0	0	0	0	0	0	0	0	0	0	0	0	0	0	0	0	0	0	4	10	0	0	0	0	0	0	0	0	0	12	0
5587b44018006d39c1fb37a8507f34dc	ASV2707	Bacteria	Bdellovibrionota	Bdellovibrionia	Bacteriovoracales	Bacteriovoracaceae	Peredibacter	NA	0	0	0	0	0	0	18	0	0	0	8	0	0	0	0	0	0	0	0	0	0	0	0	0	0	0	0	0	0	0	0	0	0	0	0	0	0	0	0	0	0
dd80d3823286c515bfdfe5d7eecac196	ASV4649	Bacteria	Bdellovibrionota	Bdellovibrionia	Bacteriovoracales	Bacteriovoracaceae	Peredibacter	NA	0	0	0	0	0	0	0	0	0	0	0	0	0	0	0	0	0	0	0	0	0	0	26	0	0	0	0	0	0	0	0	0	0	0	0	0	0	0	0	0	0
1ff497888df33bbd6b30b65f01d77fec	ASV277	Bacteria	Bdellovibrionota	Bdellovibrionia	Bacteriovoracales	Bacteriovoracaceae	Peredibacter	NA	0	0	0	0	0	19	0	0	0	0	0	0	0	0	0	0	0	0	0	0	0	0	0	0	0	0	0	0	0	0	6	0	0	0	0	0	0	0	0	0	0
d8a4da7e363db316bd960c511c8e0550	ASV4463	Bacteria	Bdellovibrionota	Bdellovibrionia	Bacteriovoracales	Bacteriovoracaceae	Peredibacter	NA	0	0	0	0	0	0	0	0	0	0	0	0	0	0	0	0	0	10	7	0	0	0	0	0	0	0	0	0	0	0	0	0	6	0	0	0	0	0	0	0	0
f8c0a6a28b82b1a180ff0c1abbc35a24	ASV5146	Bacteria	Bdellovibrionota	Bdellovibrionia	Bacteriovoracales	Bacteriovoracaceae	Peredibacter	NA	0	0	0	0	0	0	0	0	0	0	0	0	0	0	0	0	0	0	0	0	0	0	0	0	0	0	0	0	0	23	0	0	0	0	0	0	0	0	0	0	0
093e4a1d1089c65e56f3b4fd6838260c	ASV2033	Bacteria	Bdellovibrionota	Bdellovibrionia	Bacteriovoracales	Bacteriovoracaceae	Peredibacter	NA	0	0	0	0	0	0	0	0	0	0	0	0	0	0	0	0	0	0	0	0	0	0	0	0	0	0	0	0	0	0	0	0	0	0	22	0	0	0	0	0	0
5a4455abeec135baa549f04c1596cbc5	ASV683	Bacteria	Bdellovibrionota	Bdellovibrionia	Bacteriovoracales	Bacteriovoracaceae	Peredibacter	uncultured_bacterium	0	0	0	0	0	0	0	0	0	0	0	0	0	0	0	0	0	0	0	0	0	0	0	0	0	0	0	0	0	0	0	0	0	0	0	0	0	0	0	14	0
603e407fc8aa34d46e706dd050d09918	ASV2361	Bacteria	Bdellovibrionota	Bdellovibrionia	Bacteriovoracales	Bacteriovoracaceae	Peredibacter	NA	0	0	0	0	0	0	0	0	0	0	0	0	0	0	0	0	0	0	0	0	0	0	0	22	0	0	0	0	0	0	0	0	0	0	0	0	0	0	0	0	0
b42792feadf004ad551b546bc624f586	ASV3869	Bacteria	Bdellovibrionota	Bdellovibrionia	Bacteriovoracales	Bacteriovoracaceae	Peredibacter	uncultured_marine	0	0	0	0	0	0	0	0	0	0	0	0	0	0	0	0	0	0	0	0	0	0	0	0	0	0	0	0	0	0	0	4	8	10	0	0	0	0	0	0	0
f5915443e250cfd7cd206b8dc9a5fcc2	ASV5260	Bacteria	Bdellovibrionota	Bdellovibrionia	Bacteriovoracales	Bacteriovoracaceae	Peredibacter	NA	0	0	0	0	0	0	0	0	0	0	0	0	3	0	0	0	0	0	0	0	0	0	8	0	0	0	0	0	0	11	0	0	0	0	0	0	0	0	0	0	0
38edbb04584fcd2d47a24e5b3e5c76d1	ASV1576	Bacteria	Bdellovibrionota	Bdellovibrionia	Bacteriovoracales	Bacteriovoracaceae	Peredibacter	NA	0	0	0	0	0	0	0	0	0	0	0	15	0	0	0	0	0	0	0	0	0	0	0	5	0	0	0	0	0	0	0	0	0	0	0	0	0	0	0	0	0
f32b06f0e98516cb0034acd350697b59	ASV5174	Bacteria	Bdellovibrionota	Bdellovibrionia	Bacteriovoracales	Bacteriovoracaceae	uncultured	NA	14	12	0	17	0	0	0	0	0	0	0	0	0	0	9	0	18	18	0	0	11	8	15	0	18	0	0	0	0	7	0	0	17	11	0	46	36	24	0	0	8
8c35d309a9ebbf8e95fb20522a938f25	ASV1122	Bacteria	Bdellovibrionota	Bdellovibrionia	Bacteriovoracales	Bacteriovoracaceae	uncultured	uncultured_delta	0	0	28	0	52	27	0	0	0	0	0	0	0	12	35	0	0	0	0	0	0	0	16	0	0	10	0	0	0	0	21	0	20	0	0	0	0	0	0	0	0
13c037d8ec409a320c7c44ca14cb4c28	ASV1386	Bacteria	Bdellovibrionota	Bdellovibrionia	Bacteriovoracales	Bacteriovoracaceae	uncultured	uncultured_deep-sea	44	0	0	0	22	0	0	0	0	0	16	0	0	6	12	0	0	0	0	0	0	0	0	0	0	0	0	0	0	0	0	0	0	0	32	0	0	0	0	0	0
98007aa0edf2c0d62ffb1cf0b1873de0	ASV3055	Bacteria	Bdellovibrionota	Bdellovibrionia	Bacteriovoracales	Bacteriovoracaceae	uncultured	uncultured_delta	16	0	0	5	0	0	0	0	0	0	0	0	0	0	0	0	0	32	0	11	0	0	10	17	13	0	0	0	0	0	0	0	0	0	0	0	0	0	0	0	0
a6b6a8d49ed9e2720d170c893e7134ad	ASV3429	Bacteria	Bdellovibrionota	Bdellovibrionia	Bacteriovoracales	Bacteriovoracaceae	uncultured	uncultured_delta	0	0	0	0	0	0	0	0	25	0	0	0	0	0	0	0	0	0	0	0	0	0	0	0	0	23	0	0	0	8	0	14	13	0	0	0	0	0	0	0	0
e853f0c93358a3ca1d72b692b45da86e	ASV4898	Bacteria	Bdellovibrionota	Bdellovibrionia	Bacteriovoracales	Bacteriovoracaceae	uncultured	NA	29	0	0	16	0	0	0	0	0	0	0	0	0	0	0	0	0	0	0	0	0	19	0	0	0	0	0	0	0	0	0	0	0	0	0	0	0	0	0	0	0
d05621dbbf11a18cc14a21643c073902	ASV4540	Bacteria	Bdellovibrionota	Bdellovibrionia	Bacteriovoracales	Bacteriovoracaceae	uncultured	NA	0	0	0	0	0	0	0	0	0	0	0	0	0	0	0	0	0	0	0	0	0	0	0	0	0	0	0	0	0	0	0	0	0	0	0	0	0	23	0	17	0
122091e356a6d7c1ee93eb8cc52cf3fd	ASV3068	Bacteria	Bdellovibrionota	Bdellovibrionia	Bacteriovoracales	Bacteriovoracaceae	uncultured	NA	0	0	0	0	0	0	0	0	0	0	0	0	0	0	0	0	0	0	0	0	0	0	0	0	0	0	0	0	0	0	0	0	0	0	0	0	19	0	0	0	17
091b4f34f7d5a4c50029fa2625c59144	ASV2013	Bacteria	Bdellovibrionota	Bdellovibrionia	Bacteriovoracales	Bacteriovoracaceae	uncultured	uncultured_delta	0	0	0	0	0	0	0	0	0	0	0	0	0	0	0	10	0	0	0	0	0	0	0	0	11	0	0	0	0	0	0	0	0	0	0	0	14	0	0	0	0
9b7d66c17d92418cb3b8f4ee7ec9b46c	ASV1240	Bacteria	Bdellovibrionota	Bdellovibrionia	Bacteriovoracales	Bacteriovoracaceae	uncultured	NA	10	0	0	0	0	0	0	0	10	0	0	0	0	0	0	0	0	0	0	0	0	0	0	0	0	0	15	0	0	0	0	0	0	0	0	0	0	0	0	0	0
1d73ad650baad9235a8e6d7f5d32babc	ASV203	Bacteria	Bdellovibrionota	Bdellovibrionia	Bacteriovoracales	Bacteriovoracaceae	uncultured	uncultured_bacterium	0	0	0	0	0	0	0	0	0	0	0	0	0	0	0	0	12	11	0	0	0	0	0	0	0	0	0	0	0	0	0	0	0	0	0	0	0	10	0	0	0
8eb4c1c58fe09e6b1fe5e6912512f144	ASV1178	Bacteria	Bdellovibrionota	Bdellovibrionia	Bacteriovoracales	Bacteriovoracaceae	uncultured	uncultured_bacterium	0	0	0	0	0	0	0	15	0	0	0	0	0	0	0	0	0	0	0	0	0	0	0	0	0	0	0	0	0	0	0	0	0	0	0	0	0	0	17	0	0
4db56fd62f96252257b647ea32e37cb4	ASV618	Bacteria	Bdellovibrionota	Bdellovibrionia	Bacteriovoracales	Bacteriovoracaceae	uncultured	uncultured_bacterium	0	0	0	0	0	0	0	0	0	0	0	0	0	0	0	0	0	0	0	0	0	0	0	0	0	0	0	0	0	30	0	0	0	0	0	0	0	0	0	0	0
60c258d4a3345f409ba0f45eddb51244	ASV1729	Bacteria	Bacteroidota	Bacteroidia	Bacteroidales	Bacteroidetes_BD2-2	Bacteroidetes_BD2-2	uncultured_Bacteroidetes	0	0	0	0	23	0	38	61	51	11	0	0	0	0	0	0	0	0	0	0	0	0	0	0	0	90	19	60	49	0	0	56	66	9	0	0	0	0	22	0	0
9288c303a11b684a1e70de0836dcbad3	ASV2837	Bacteria	Bacteroidota	Bacteroidia	Bacteroidales	Bacteroidetes_BD2-2	Bacteroidetes_BD2-2	NA	36	0	0	0	90	0	0	14	0	0	0	0	5	0	0	0	0	0	0	17	7	10	9	6	18	0	0	4	0	0	36	0	0	0	0	0	0	0	0	0	0
c8c650d742f6d725239a1b3a1d2b9020	ASV4095	Bacteria	Bacteroidota	Bacteroidia	Bacteroidales	Bacteroidetes_BD2-2	Bacteroidetes_BD2-2	NA	0	0	0	0	0	0	30	0	23	0	0	0	0	0	0	0	0	0	0	0	0	0	0	0	0	0	9	25	51	0	0	32	40	0	0	0	0	0	0	0	0
6488b9f563a4024a91b02343cb741181	ASV2738	Bacteria	Bacteroidota	Bacteroidia	Bacteroidales	Bacteroidetes_BD2-2	Bacteroidetes_BD2-2	NA	0	0	0	0	46	0	10	0	0	0	5	8	0	23	0	0	0	0	0	0	0	0	0	0	0	0	0	0	0	0	0	0	28	5	0	0	0	0	0	0	0
83aa638a0d798b993a5cb244a74da5a1	ASV1932	Bacteria	Bacteroidota	Bacteroidia	Bacteroidales	Bacteroidetes_BD2-2	Bacteroidetes_BD2-2	NA	0	0	0	0	35	0	0	0	0	0	0	0	0	0	0	0	0	0	0	0	0	0	0	0	0	0	0	0	0	0	64	0	0	0	0	0	0	0	0	0	0
b74c2d90072c1192d139d0687ba3e141	ASV3810	Bacteria	Bacteroidota	Bacteroidia	Bacteroidales	Bacteroidetes_BD2-2	Bacteroidetes_BD2-2	NA	0	0	0	0	0	0	22	24	15	0	0	0	0	0	0	0	0	0	0	0	0	0	0	0	0	0	0	9	0	0	0	0	0	0	0	0	0	0	22	0	0
2cb4a0987d5e51082913bd14feff6b72	ASV333	Bacteria	Bacteroidota	Bacteroidia	Bacteroidales	Bacteroidetes_BD2-2	Bacteroidetes_BD2-2	NA	0	0	0	0	0	0	18	0	0	0	0	0	0	0	0	0	0	0	0	0	0	0	0	0	0	0	0	27	28	0	0	0	17	0	0	0	0	0	0	0	0
ebe29826fe98d4accee12a72a5299eb1	ASV4974	Bacteria	Bacteroidota	Bacteroidia	Bacteroidales	Bacteroidetes_BD2-2	Bacteroidetes_BD2-2	NA	0	0	0	0	0	0	0	0	0	0	0	0	0	0	0	0	0	0	0	0	0	0	0	0	0	72	0	0	0	0	0	10	0	0	0	0	0	0	0	0	0
1014482b1d525ab46e40974ae02c491b	ASV3200	Bacteria	Bacteroidota	Bacteroidia	Bacteroidales	Bacteroidetes_BD2-2	Bacteroidetes_BD2-2	uncultured_organism	0	0	0	0	0	0	0	17	9	0	0	0	0	0	0	0	0	0	0	0	0	0	0	0	0	19	0	12	12	0	0	0	12	0	0	0	0	0	0	0	0
1ddf784169cb6797ab81d5bfc9da76ec	ASV220	Bacteria	Bacteroidota	Bacteroidia	Bacteroidales	Bacteroidetes_BD2-2	Bacteroidetes_BD2-2	uncultured_Bacteroidetes	0	0	0	0	7	0	25	0	0	0	0	0	0	0	0	0	0	0	0	0	0	0	0	0	0	5	0	0	0	0	0	0	0	0	0	0	0	0	0	0	0
4d19717d7f9d6ef2ec8282fae6ef8003	ASV616	Bacteria	Bacteroidota	Bacteroidia	Bacteroidales	Bacteroidetes_BD2-2	Bacteroidetes_BD2-2	NA	0	0	0	0	0	0	0	0	0	0	0	0	0	0	0	0	0	0	0	0	0	0	0	0	0	25	9	0	0	0	0	0	0	0	0	0	0	0	0	0	0
5e2ed5c7b0e94fe4783b1c84080ceedc	ASV763	Bacteria	Bacteroidota	Bacteroidia	Bacteroidales	Bacteroidetes_BD2-2	Bacteroidetes_BD2-2	NA	0	0	0	0	0	0	0	0	0	0	0	0	0	0	0	0	0	0	0	0	0	0	0	0	0	24	0	0	0	0	0	0	9	0	0	0	0	0	0	0	0
55a286d43284c728dad861566d18fdbc	ASV1696	Bacteria	Bacteroidota	Bacteroidia	Bacteroidales	Bacteroidetes_BD2-2	Bacteroidetes_BD2-2	NA	0	0	0	0	0	0	0	0	0	0	0	0	0	0	0	0	0	0	0	28	0	0	0	0	0	0	0	0	0	0	0	0	0	0	0	0	0	0	0	0	0
5da45b5100d98765a4450521e4cc1182	ASV752	Bacteria	Bacteroidota	Bacteroidia	Bacteroidales	Bacteroidetes_BD2-2	Bacteroidetes_BD2-2	NA	0	0	0	0	0	0	0	28	0	0	0	0	0	0	0	0	0	0	0	0	0	0	0	0	0	0	0	0	0	0	0	0	0	0	0	0	0	0	0	0	0
9c6131466c68ee6855ce5f5c8568a075	ASV1268	Bacteria	Bacteroidota	Bacteroidia	Bacteroidales	Bacteroidetes_BD2-2	Bacteroidetes_BD2-2	NA	0	0	0	0	0	0	0	0	0	0	0	0	0	0	0	0	0	0	0	0	0	0	0	0	0	0	0	0	28	0	0	0	0	0	0	0	0	0	0	0	0
12bf7dbd0d5b66bf8cef404e5bbc8d15	ASV1375	Bacteria	Bacteroidota	Bacteroidia	Bacteroidales	Bacteroidetes_BD2-2	Bacteroidetes_BD2-2	uncultured_Bacteroidetes	0	0	0	0	0	0	0	0	0	0	0	0	0	0	0	0	0	0	0	0	0	0	0	0	0	12	8	0	0	0	0	0	0	0	0	0	0	0	0	0	0
aa3a88d5a3ab9537f555b32862aa7d65	ASV3580	Bacteria	Bacteroidota	Bacteroidia	Bacteroidales	Marinilabiliaceae	Carboxylicivirga	Carboxylicivirga_sediminis	0	0	0	0	0	0	50	83	72	90	0	0	0	21	0	0	0	0	0	0	0	0	31	14	0	57	52	61	42	96	0	121	104	32	0	0	0	0	55	0	0
e9ac26ba0d681f081d5f38e7bb4e6c16	ASV4814	Bacteria	Bacteroidota	Bacteroidia	Bacteroidales	Marinilabiliaceae	Carboxylicivirga	uncultured_bacterium	0	0	0	0	0	0	0	0	0	0	56	0	0	0	0	24	0	0	0	0	0	0	0	0	0	0	0	0	0	0	34	0	0	0	40	0	0	0	0	0	0
8a3dc4209d50db29bb4e4318cfab135e	ASV1069	Bacteria	Bacteroidota	Bacteroidia	Bacteroidales	Marinilabiliaceae	Carboxylicivirga	uncultured_bacterium	0	0	0	0	0	0	0	0	0	0	0	0	0	0	70	0	0	0	0	0	0	0	0	0	0	0	0	0	0	0	0	0	0	0	0	0	0	0	0	0	0
198a9c644db79f4438bcc173529126cc	ASV2143	Bacteria	Bacteroidota	Bacteroidia	Bacteroidales	Prolixibacteraceae	Draconibacterium	uncultured_bacterium	32	11	39	0	486	0	114	20	58	25	0	15	0	226	0	0	0	0	156	0	0	0	60	0	0	36	22	44	50	0	115	36	91	0	0	0	0	0	33	0	0
9a48326653fd684f8ab130e829eafd32	ASV1220	Bacteria	Bacteroidota	Bacteroidia	Bacteroidales	Prolixibacteraceae	Draconibacterium	NA	0	0	0	0	497	33	57	21	33	12	0	0	0	146	0	0	0	0	38	0	0	22	84	0	0	126	0	42	38	0	56	41	61	0	0	0	0	0	0	0	0
896878b5d36c4e0440aee5851249d07a	ASV3182	Bacteria	Bacteroidota	Bacteroidia	Bacteroidales	Prolixibacteraceae	Draconibacterium	NA	0	0	0	0	217	0	0	0	0	0	0	0	0	0	0	0	0	0	0	0	0	55	0	0	0	0	0	0	0	0	0	0	0	0	0	0	0	0	0	0	0
f7fa7f24985e821696d6c87025bbe02e	ASV5141	Bacteria	Bacteroidota	Bacteroidia	Bacteroidales	Prolixibacteraceae	Draconibacterium	uncultured_bacterium	0	0	0	0	0	0	0	0	19	0	0	0	0	0	0	0	0	0	0	0	0	0	0	0	0	48	0	0	0	0	0	28	12	0	0	0	0	0	0	0	0
f401bf6fe09ac8a4947721642f391b1a	ASV5214	Bacteria	Bacteroidota	Bacteroidia	Bacteroidales	Prolixibacteraceae	Draconibacterium	NA	0	0	0	0	0	0	0	0	0	0	0	0	0	0	0	0	0	0	0	0	0	0	0	0	0	22	20	0	38	0	0	0	0	0	0	0	0	0	0	0	0
c892a235078b2c8aa8aed9f8ab33be6e	ASV4204	Bacteria	Bacteroidota	Bacteroidia	Bacteroidales	Prolixibacteraceae	Draconibacterium	uncultured_bacterium	0	0	0	0	0	0	0	0	0	0	0	0	0	0	0	0	0	0	0	0	0	0	0	0	0	38	16	0	0	0	0	0	0	0	5	0	0	0	0	0	0
707e1cc83d5ba5d3316e8b2f37fe1cb1	ASV2419	Bacteria	Bacteroidota	Bacteroidia	Bacteroidales	Prolixibacteraceae	Draconibacterium	uncultured_bacterium	0	0	0	0	0	0	0	0	0	0	0	0	31	0	0	0	0	0	0	0	0	0	0	0	0	0	0	0	0	0	0	0	0	0	0	0	0	0	0	0	0
bda12f0f7897f64f87e15b3a4e9c3050	ASV3969	Bacteria	Bacteroidota	Bacteroidia	Bacteroidales	Marinifilaceae	Marinifilum	NA	53	52	133	44	716	447	37	30	38	83	0	167	97	417	121	100	80	27	112	165	25	129	163	53	76	69	23	16	28	86	142	36	40	23	304	0	31	74	19	0	4
3403a181b239308f6cd5447eabb5bfdf	ASV2642	Bacteria	Bacteroidota	Bacteroidia	Bacteroidales	Marinifilaceae	Marinifilum	marine_bacterium	0	22	85	0	169	357	0	90	52	186	0	88	24	82	0	0	0	0	0	0	0	74	66	44	0	125	0	29	42	276	78	95	180	0	0	0	10	0	0	0	0
f4ec2cacd34f08044352fc6a1f95fb49	ASV5112	Bacteria	Bacteroidota	Bacteroidia	Bacteroidales	Marinifilaceae	Marinifilum	Marinifilum_albidiflavum	187	51	24	15	224	181	0	0	0	0	0	47	31	74	17	0	89	27	17	0	0	60	145	50	46	0	0	0	0	0	77	0	0	0	39	0	17	15	0	0	0
4fc182e97c7f9036619178f218a774a2	ASV675	Bacteria	Bacteroidota	Bacteroidia	Bacteroidales	Marinifilaceae	Marinifilum	NA	0	0	0	0	0	0	40	0	63	69	33	0	0	0	13	12	0	0	12	0	0	0	0	0	0	75	70	0	0	0	65	60	0	21	48	0	0	20	44	0	0
e7bdeda80b4a8b059de2447587194b8e	ASV4798	Bacteria	Bacteroidota	Bacteroidia	Bacteroidales	Marinifilaceae	Marinifilum	uncultured_bacterium	0	0	0	0	0	0	17	14	30	18	12	0	0	0	0	0	0	0	0	0	0	0	0	0	0	24	28	13	0	10	0	41	25	6	0	0	0	0	14	0	0
4b547bc207176a76cf6f1c3ee89166d0	ASV560	Bacteria	Bacteroidota	Bacteroidia	Bacteroidales	Marinifilaceae	Marinifilum	Marinifilum_sp.	21	0	0	0	113	16	0	0	0	0	0	0	0	17	0	0	0	0	0	0	0	16	14	0	0	0	0	0	0	0	28	0	0	0	0	0	0	0	0	0	0
ba8fcb1eb94f0165bb2be77682a1f912	ASV3898	Bacteria	Bacteroidota	Bacteroidia	Bacteroidales	Marinifilaceae	Marinifilum	Marinifilum_sp.	0	0	0	0	0	0	0	0	0	0	0	0	0	117	0	54	0	0	0	0	0	0	0	0	0	0	0	0	0	0	40	0	0	0	0	0	0	0	0	0	0
deb7010c4e44207592c86129edd73b03	ASV4679	Bacteria	Bacteroidota	Bacteroidia	Bacteroidales	NA	NA	NA	9	13	12	0	62	20	38	70	64	22	0	7	0	14	4	5	0	11	20	12	7	15	59	0	0	21	15	33	15	27	15	72	31	15	10	0	0	14	51	0	0
d88661373d9361fde4b0a90cd0973de3	ASV4572	Bacteria	Bacteroidota	Bacteroidia	Bacteroidales	NA	NA	NA	32	25	0	10	0	16	0	0	0	0	0	0	5	0	22	0	19	52	0	47	49	8	14	14	81	0	0	0	0	0	4	0	0	0	0	0	23	29	0	57	70
af84cfaa5723c8d3134d60c5143eaee9	ASV3683	Bacteria	Bacteroidota	Bacteroidia	Bacteroidales	Prolixibacteraceae	NA	NA	0	0	0	0	0	0	0	11	12	0	0	0	0	0	0	0	0	0	0	0	0	0	0	0	0	92	0	0	11	0	0	0	59	0	0	0	0	0	9	0	0
c3171764bdd5405523ac6183af067c8e	ASV4255	Bacteria	Bacteroidota	Bacteroidia	Bacteroidales	NA	NA	NA	0	0	0	11	7	25	0	0	0	0	0	12	0	0	19	0	11	0	0	0	0	0	0	0	0	0	0	0	0	0	7	0	0	0	4	7	0	16	0	0	0
050fe4c9ac2fea4e055220be40b3eab7	ASV1664	Bacteria	Bacteroidota	Bacteroidia	Bacteroidales	NA	NA	NA	0	13	0	0	0	0	0	0	0	0	0	0	0	0	0	8	0	0	0	0	0	0	0	0	0	0	0	0	0	0	0	0	0	0	0	0	13	0	0	0	8
bcd9ecef9fb4d7de2b8b329533ddef75	ASV3956	Bacteria	Bacteroidota	Bacteroidia	Bacteroidales	NA	NA	NA	0	0	0	0	0	0	0	0	0	0	0	0	0	0	0	0	0	0	0	0	0	0	0	0	0	0	0	0	0	0	0	0	0	0	25	0	0	0	0	0	0
e59256b45d4cb866bd2c40fc668df0f4	ASV4920	Bacteria	Bacteroidota	Bacteroidia	Bacteroidales	NA	NA	NA	0	0	0	0	0	0	0	0	0	0	15	0	0	0	0	0	0	0	0	0	0	0	0	0	0	0	0	0	0	0	0	0	0	0	0	0	7	0	0	0	0
96583ddfe5ef0b1150f67bd9d7a6e4f7	ASV3049	Bacteria	Bacteroidota	Bacteroidia	Bacteroidales	Prolixibacteraceae	NA	NA	0	0	0	0	0	0	13	0	0	0	0	0	0	0	0	0	0	0	0	0	0	0	0	0	0	0	0	7	0	0	0	0	0	0	0	0	0	0	0	0	0
c4a3191e2fe9a54bb38e2b54a59a78a7	ASV4057	Bacteria	Bacteroidota	Bacteroidia	Bacteroidales	SB-5	SB-5	uncultured_organism	0	0	0	0	0	0	26	0	0	0	0	0	0	0	0	0	0	0	0	0	0	0	0	0	0	10	0	0	34	0	0	35	13	0	0	0	0	0	0	0	0
764fc9685e1d0ae445eab8bf686b6b5a	ASV2452	Bacteria	Bacteroidota	Bacteroidia	Bacteroidales	Prolixibacteraceae	Sunxiuqinia	NA	0	0	0	0	19	0	0	0	0	0	0	0	0	32	0	8	0	0	33	0	0	0	0	0	0	0	0	0	0	0	0	0	21	0	8	0	0	0	0	0	0
f856cca85658c77241be6fff745b603d	ASV5228	Bacteria	Bacteroidota	Bacteroidia	Bacteroidales	Prolixibacteraceae	Sunxiuqinia	NA	0	0	0	0	0	0	0	0	0	0	0	0	0	0	0	0	0	0	0	0	0	0	0	0	0	15	0	0	0	0	7	0	0	0	49	0	0	0	0	0	0
3e830c4f072f223645e41697df968eec	ASV503	Bacteria	Bacteroidota	Bacteroidia	Bacteroidales	Marinifilaceae	uncultured	uncultured_bacterium	0	0	3	0	16	0	0	0	0	0	0	5	0	19	0	0	0	0	7	0	0	0	0	0	0	0	0	0	0	0	8	0	0	0	0	0	0	0	0	0	0
ca1fe39b4a39c4440faee621ac172668	ASV4266	Bacteria	Bacteroidota	Rhodothermia	Balneolales	Balneolaceae	B2706-C7	uncultured_Sphingobacteriales	25	19	16	25	18	0	0	0	0	0	0	8	0	0	0	34	37	83	0	0	22	33	21	0	38	0	0	0	0	0	36	0	22	0	36	39	57	26	0	48	35
4340655c3876cfda86476b41b4065c9d	ASV3230	Bacteria	Bacteroidota	Rhodothermia	Balneolales	Balneolaceae	B2706-C7	NA	0	0	0	0	0	0	8	23	13	0	0	0	0	0	0	0	0	0	12	0	0	0	0	0	0	25	0	0	17	23	0	36	21	0	0	0	0	0	9	0	0
e98c0e51969565edc9919727ba53c801	ASV4872	Bacteria	Bacteroidota	Rhodothermia	Balneolales	Balneolaceae	B2706-C7	uncultured_Sphingobacteriales	0	0	0	0	0	0	0	33	0	13	30	0	0	0	0	0	0	0	0	0	0	0	0	0	0	0	24	0	12	0	0	17	0	17	0	0	0	0	19	0	0
ddee619a0420deb8890f1e9868ce49df	ASV4663	Bacteria	Bacteroidota	Rhodothermia	Balneolales	Balneolaceae	B2706-C7	uncultured_bacterium	0	0	0	0	0	0	0	0	0	0	0	0	0	0	0	0	0	0	0	0	0	0	0	33	0	21	0	0	0	0	0	0	0	0	0	0	0	0	0	0	0
1d3706d3680c94951be485d7c60a5eaf	ASV211	Bacteria	Bacteroidota	Rhodothermia	Balneolales	Balneolaceae	Balneola	uncultured_bacterium	51	29	101	0	436	99	91	102	121	38	43	82	40	159	28	0	41	59	67	22	26	91	70	42	18	445	33	76	80	121	92	141	307	52	245	56	0	38	96	29	31
3ab7e0f3fcfcad3f5d06933818b4fc73	ASV421	Bacteria	Bacteroidota	Rhodothermia	Balneolales	Balneolaceae	Balneola	NA	62	39	157	45	29	67	0	0	0	0	0	81	29	33	60	61	69	67	17	64	51	46	75	35	52	0	0	0	0	0	67	0	0	0	80	69	72	82	0	49	24
f62e603f85be680fcef8ce9172aad70b	ASV5186	Bacteria	Bacteroidota	Rhodothermia	Balneolales	Balneolaceae	Balneola	NA	0	0	77	0	92	25	21	29	37	0	39	23	0	49	24	0	0	0	0	0	0	41	49	0	0	83	0	52	68	30	75	18	34	0	39	0	42	34	0	37	0
8b959d1d44f0ea43b48cec6fc8a0774a	ASV1105	Bacteria	Bacteroidota	Rhodothermia	Balneolales	Balneolaceae	Balneola	uncultured_Bacteroidetes	0	0	0	0	0	0	25	0	17	0	23	0	0	0	0	0	0	0	0	0	0	0	0	0	0	35	0	22	17	0	0	30	0	18	0	0	0	0	28	0	0
1398f5f4e63608cfb0d45fb861206b63	ASV2569	Bacteria	Bacteroidota	Rhodothermia	Balneolales	Balneolaceae	Balneola	NA	0	0	0	0	0	0	0	0	0	7	14	0	0	0	0	0	0	0	0	0	0	0	0	0	0	15	0	11	0	0	0	15	0	8	0	0	0	0	0	0	0
e8c2042ab5d676ff3921b676428de265	ASV4810	Bacteria	Bacteroidota	Rhodothermia	Balneolales	Balneolaceae	Balneola	uncultured_Balneola	0	10	0	0	0	0	0	0	0	0	0	0	0	0	0	10	0	19	0	0	0	0	0	0	0	0	0	0	0	0	0	0	0	0	10	0	0	8	0	0	0
b7d541b213158cb26c4b1e9d4dc49ab9	ASV3748	Bacteria	Bacteroidota	Rhodothermia	Balneolales	Balneolaceae	Balneola	NA	0	0	13	0	0	0	0	0	0	0	0	0	0	0	0	0	0	0	0	0	0	0	0	0	0	0	0	0	0	0	0	0	0	0	20	12	0	0	0	0	11
24de6e56f3c2cc0b688e56163f3a2146	ASV1469	Bacteria	Bacteroidota	Rhodothermia	Balneolales	Balneolaceae	Balneola	uncultured_Chitinophagaceae	0	0	0	0	0	0	0	0	0	0	0	0	0	0	0	0	0	0	0	0	0	0	0	0	0	0	0	0	0	0	0	0	0	0	0	0	0	34	0	0	0
5fcf37daff9f8e1f383c356291d8a359	ASV798	Bacteria	Bacteroidota	Rhodothermia	Balneolales	Balneolaceae	Balneola	NA	0	0	0	0	0	0	0	0	0	0	0	0	0	0	0	22	0	0	0	0	0	0	0	0	0	0	0	0	0	0	0	0	0	0	0	0	0	0	0	0	0
ef87884db9eec864b22352c0107ff6bf	ASV5063	Bacteria	Bacteroidota	Rhodothermia	Balneolales	Balneolaceae	Balneolaceae	uncultured_bacterium	0	0	0	0	0	0	0	0	0	0	0	0	0	0	0	0	0	0	0	0	0	0	0	0	0	0	0	8	64	0	0	0	0	0	0	18	0	0	0	0	0
36234ba4c98df01b1822c3f49e848d79	ASV2929	Bacteria	Bacteroidota	Rhodothermia	Balneolales	Balneolaceae	Gracilimonas	uncultured_bacterium	0	0	0	0	7	0	19	0	25	0	9	0	0	0	0	0	0	0	0	4	0	0	11	0	12	31	27	21	0	0	0	27	13	25	0	0	0	11	8	0	0
9d0d3c10ec33706e2974cbf8aea77f25	ASV1277	Bacteria	Gemmatimonadota	BD2-11_terrestrial_group	BD2-11_terrestrial_group	BD2-11_terrestrial_group	BD2-11_terrestrial_group	uncultured_marine	818	801	880	894	930	755	133	154	131	47	106	904	522	847	506	813	854	1068	476	1078	668	1188	968	768	406	62	80	125	83	63	968	103	69	157	517	1028	805	1166	150	582	575
d20009baf8b0305992c65f71e254df2e	ASV4550	Bacteria	Gemmatimonadota	BD2-11_terrestrial_group	BD2-11_terrestrial_group	BD2-11_terrestrial_group	BD2-11_terrestrial_group	uncultured_bacterium	769	276	145	219	366	194	23	27	38	0	0	146	90	158	116	178	249	506	109	226	237	293	397	237	206	66	41	33	16	12	408	63	30	23	196	294	456	336	33	119	236
e55b8fc9249aff918b27b87cf94e2b04	ASV4852	Bacteria	Gemmatimonadota	BD2-11_terrestrial_group	BD2-11_terrestrial_group	BD2-11_terrestrial_group	BD2-11_terrestrial_group	uncultured_bacterium	89	53	94	127	68	60	71	160	94	74	183	74	62	25	59	138	100	314	90	212	113	75	54	69	43	85	155	66	34	44	73	228	97	226	100	184	177	136	152	115	105
3e922881bcac3d446591905feba58ca6	ASV508	Bacteria	Gemmatimonadota	BD2-11_terrestrial_group	BD2-11_terrestrial_group	BD2-11_terrestrial_group	BD2-11_terrestrial_group	NA	82	44	0	0	0	97	197	211	235	101	235	0	63	67	0	82	87	86	131	70	55	72	100	94	81	224	166	206	141	72	94	188	159	209	78	119	79	109	229	46	69
95faf5f8326edef2a641431138ee8c19	ASV2049	Bacteria	Gemmatimonadota	BD2-11_terrestrial_group	BD2-11_terrestrial_group	BD2-11_terrestrial_group	BD2-11_terrestrial_group	uncultured_marine	90	0	66	67	0	54	156	154	146	83	205	75	0	68	57	76	82	71	139	101	51	111	57	67	59	103	122	118	130	71	59	138	80	222	35	93	72	82	242	0	85
4e22f4c42ba3fb9702826a9394b746aa	ASV630	Bacteria	Gemmatimonadota	BD2-11_terrestrial_group	BD2-11_terrestrial_group	BD2-11_terrestrial_group	BD2-11_terrestrial_group	uncultured_bacterium	119	82	45	61	62	71	51	50	66	15	31	45	40	62	49	87	79	92	40	103	82	75	44	112	108	51	30	57	23	14	69	54	28	42	41	131	45	101	43	63	56
11d26af4d34a575f8fd23ff4264dabdc	ASV1366	Bacteria	Gemmatimonadota	BD2-11_terrestrial_group	BD2-11_terrestrial_group	BD2-11_terrestrial_group	BD2-11_terrestrial_group	uncultured_marine	0	33	0	0	51	0	138	118	143	64	126	48	0	0	42	0	0	0	117	0	44	0	0	0	0	219	94	213	177	0	0	152	86	165	0	65	0	0	219	0	0
fab9d191d6278cdf4700b7f39b53ae47	ASV5291	Bacteria	Gemmatimonadota	BD2-11_terrestrial_group	BD2-11_terrestrial_group	BD2-11_terrestrial_group	BD2-11_terrestrial_group	NA	114	62	49	63	43	49	0	13	16	0	0	33	27	58	52	103	51	109	36	108	70	64	98	86	71	0	14	0	0	0	71	0	0	22	47	121	122	53	23	51	82
893d029e0d6e08c0a3aa211fc27088ea	ASV2509	Bacteria	Gemmatimonadota	BD2-11_terrestrial_group	BD2-11_terrestrial_group	BD2-11_terrestrial_group	BD2-11_terrestrial_group	uncultured_marine	68	77	59	52	62	0	53	92	54	0	64	54	47	58	0	43	53	90	0	82	43	0	96	70	0	0	61	44	0	0	53	58	48	79	36	87	48	57	70	48	0
4f1cf4af38499e4b2062ebd6ea122b1a	ASV655	Bacteria	Gemmatimonadota	BD2-11_terrestrial_group	BD2-11_terrestrial_group	BD2-11_terrestrial_group	BD2-11_terrestrial_group	uncultured_bacterium	17	0	32	24	0	30	87	78	84	55	119	34	0	42	13	0	0	0	44	38	0	0	32	38	12	46	50	67	42	16	0	56	53	70	0	33	0	0	86	0	0
6353db0ffde1318da5cc308b8f481624	ASV2735	Bacteria	Gemmatimonadota	BD2-11_terrestrial_group	BD2-11_terrestrial_group	BD2-11_terrestrial_group	BD2-11_terrestrial_group	uncultured_bacterium	64	69	23	37	29	17	0	0	0	0	0	13	24	21	24	47	41	108	11	49	23	21	40	37	27	0	0	0	0	0	30	0	0	0	0	29	69	56	0	27	30
2ec1b5a05d8e0af9bb48cbce425b453e	ASV377	Bacteria	Gemmatimonadota	BD2-11_terrestrial_group	BD2-11_terrestrial_group	BD2-11_terrestrial_group	BD2-11_terrestrial_group	NA	0	0	14	0	18	0	29	31	27	25	25	0	0	0	0	13	10	10	0	0	0	0	0	0	0	41	21	19	30	12	0	32	45	27	19	20	0	17	54	0	0
0bd2b464f8975f3b4126dc69821daed8	ASV43	Bacteria	Gemmatimonadota	BD2-11_terrestrial_group	BD2-11_terrestrial_group	BD2-11_terrestrial_group	BD2-11_terrestrial_group	uncultured_marine	0	0	0	0	0	0	0	52	0	0	64	0	0	0	0	0	0	0	0	0	0	0	0	0	0	50	64	0	0	0	0	0	48	60	0	0	0	0	0	0	0
c20c09277816a627ce85d566f528b5b5	ASV4118	Bacteria	Gemmatimonadota	BD2-11_terrestrial_group	BD2-11_terrestrial_group	BD2-11_terrestrial_group	BD2-11_terrestrial_group	NA	0	0	0	0	27	0	0	0	0	0	41	0	0	0	0	0	0	39	0	0	0	28	0	0	0	22	23	0	0	0	0	0	0	0	39	36	0	0	0	0	0
9033c8b8f99d8b1b553dce04b693d288	ASV2825	Bacteria	Gemmatimonadota	BD2-11_terrestrial_group	BD2-11_terrestrial_group	BD2-11_terrestrial_group	BD2-11_terrestrial_group	uncultured_actinobacterium	0	0	0	0	0	0	21	19	0	0	17	0	0	0	0	17	0	0	0	0	15	0	0	0	0	17	0	0	0	11	0	0	24	19	0	19	0	0	38	0	0
1bbbccf98d84c0d8116565dc3454cde9	ASV168	Bacteria	Gemmatimonadota	BD2-11_terrestrial_group	BD2-11_terrestrial_group	BD2-11_terrestrial_group	BD2-11_terrestrial_group	NA	0	0	0	0	0	0	0	9	14	0	0	0	0	0	0	0	0	6	11	0	0	0	0	0	0	0	6	7	18	0	0	22	11	0	0	0	0	11	23	0	0
922668f405002e7749f34d4e421dc5ff	ASV3187	Bacteria	Gemmatimonadota	BD2-11_terrestrial_group	BD2-11_terrestrial_group	BD2-11_terrestrial_group	BD2-11_terrestrial_group	uncultured_bacterium	0	0	0	0	0	0	0	0	0	0	26	0	0	0	0	0	0	0	0	27	0	0	0	0	16	0	0	0	0	0	0	0	0	0	0	32	0	0	0	0	0
a845810e5ce4f61fceac29ec1eb16e58	ASV3560	Bacteria	Gemmatimonadota	BD2-11_terrestrial_group	BD2-11_terrestrial_group	BD2-11_terrestrial_group	BD2-11_terrestrial_group	uncultured_bacterium	0	0	0	0	0	0	0	7	9	0	0	0	0	0	0	5	0	0	0	0	0	0	19	0	0	0	0	11	9	0	0	7	11	0	0	0	0	12	0	0	0
44bcf9b06952f69ef7381e39dac6887e	ASV1618	Bacteria	Gemmatimonadota	BD2-11_terrestrial_group	BD2-11_terrestrial_group	BD2-11_terrestrial_group	BD2-11_terrestrial_group	NA	0	0	0	0	0	0	0	0	0	0	0	0	0	0	0	0	0	42	0	0	0	0	0	0	0	0	0	0	0	0	0	0	0	0	0	0	22	0	0	0	0
a52f05a535375bfea7d0d3aa940a81e7	ASV3479	Bacteria	Gemmatimonadota	BD2-11_terrestrial_group	BD2-11_terrestrial_group	BD2-11_terrestrial_group	BD2-11_terrestrial_group	uncultured_bacterium	0	0	0	0	18	0	0	0	0	0	0	0	0	0	0	0	0	0	0	0	0	0	0	0	0	0	0	0	0	0	0	0	0	0	20	25	0	0	0	0	0
49e34c694e25d329f1c778a94f620a99	ASV1654	Bacteria	Gemmatimonadota	BD2-11_terrestrial_group	BD2-11_terrestrial_group	BD2-11_terrestrial_group	BD2-11_terrestrial_group	uncultured_bacterium	0	0	13	0	0	0	0	0	0	0	0	0	0	0	0	0	0	0	0	8	0	0	0	0	0	5	0	0	0	0	0	0	0	0	0	18	9	0	0	0	6
03141117922e15768e5d1b77ea373068	ASV3349	Bacteria	Gemmatimonadota	BD2-11_terrestrial_group	BD2-11_terrestrial_group	BD2-11_terrestrial_group	BD2-11_terrestrial_group	uncultured_organism	0	0	0	0	0	0	16	11	16	0	6	0	0	0	0	0	0	0	0	0	0	0	0	0	0	0	0	0	0	0	0	8	0	0	0	0	0	0	0	0	0
520e6d99d9f52d7f75a02fe6a635e383	ASV2314	Bacteria	Gemmatimonadota	BD2-11_terrestrial_group	BD2-11_terrestrial_group	BD2-11_terrestrial_group	BD2-11_terrestrial_group	NA	0	0	0	18	0	0	0	0	0	0	0	0	0	0	0	0	0	0	0	0	0	0	0	0	0	0	0	0	0	0	0	0	0	0	0	0	0	0	0	0	10
a80c9ab59d2b91c6bdf468292d5b2f50	ASV3498	Bacteria	Gemmatimonadota	BD2-11_terrestrial_group	BD2-11_terrestrial_group	BD2-11_terrestrial_group	BD2-11_terrestrial_group	uncultured_bacterium	0	0	25	0	0	0	0	0	0	0	0	0	0	0	0	0	0	0	0	0	0	0	0	0	0	0	0	0	0	0	0	0	0	0	0	0	0	0	0	0	0
b8fd4feda0a93d2c3f2d5a40c21c5b28	ASV3764	Bacteria	Gemmatimonadota	BD2-11_terrestrial_group	BD2-11_terrestrial_group	BD2-11_terrestrial_group	BD2-11_terrestrial_group	uncultured_bacterium	0	0	0	0	0	0	0	0	0	0	0	0	0	0	0	0	0	0	0	0	0	0	14	0	0	0	4	0	0	0	0	0	0	5	0	0	0	0	0	0	0
75e7d635c9559795a6e4a5d10574a606	ASV1869	Bacteria	Gemmatimonadota	BD2-11_terrestrial_group	BD2-11_terrestrial_group	BD2-11_terrestrial_group	BD2-11_terrestrial_group	uncultured_bacterium	0	0	0	0	0	0	0	0	0	0	0	0	0	0	0	0	0	0	0	0	0	0	0	0	0	0	7	0	0	0	0	7	6	0	0	0	0	0	0	0	0
6e43b1a9a5d7f368f5c79c25a345dc03	ASV895	Bacteria	Planctomycetota	BD7-11	BD7-11	BD7-11	BD7-11	uncultured_bacterium	57	33	30	37	23	65	53	58	41	34	16	56	0	36	22	23	22	52	23	49	35	31	46	24	31	15	68	27	17	0	20	37	57	43	0	14	36	29	40	41	36
16c8efb36d093a81baa127d55cda7e3c	ASV1411	Bacteria	Planctomycetota	BD7-11	BD7-11	BD7-11	BD7-11	uncultured_bacterium	59	27	35	27	38	31	22	59	27	14	34	24	27	52	18	42	30	37	17	21	49	25	19	42	22	19	24	32	31	21	31	33	19	28	0	26	27	26	40	31	0
0c7c604a6a88a18cc1cda567d7904b95	ASV50	Bacteria	Planctomycetota	BD7-11	BD7-11	BD7-11	BD7-11	uncultured_planctomycete	39	67	0	0	39	0	35	45	0	0	0	0	0	8	29	62	0	46	23	32	36	0	44	52	48	0	58	0	0	0	0	53	0	60	0	46	85	75	0	46	67
9ff56837af0e2a13679605849f347082	ASV1352	Bacteria	Planctomycetota	BD7-11	BD7-11	BD7-11	BD7-11	NA	59	41	0	48	16	18	0	0	19	0	14	13	22	14	0	54	25	54	0	50	32	40	16	17	53	0	21	0	0	0	20	0	0	0	0	9	20	19	0	0	22
f56037b8c78e36671b7792d2a16903d0	ASV5247	Bacteria	Planctomycetota	BD7-11	BD7-11	BD7-11	BD7-11	uncultured_marine	0	0	0	23	0	0	0	15	0	0	8	0	11	0	15	0	0	24	12	0	0	0	12	145	0	0	0	0	0	0	0	0	38	0	88	10	0	33	0	32	0
8e7351db7cad7a5ea354170f6ceb735c	ASV1171	Bacteria	Planctomycetota	BD7-11	BD7-11	BD7-11	BD7-11	uncultured_bacterium	36	0	0	12	7	13	0	0	0	0	0	0	14	8	0	35	19	43	8	33	41	0	0	19	14	0	0	0	0	0	0	0	0	0	0	19	39	0	0	24	22
c5fff2ced1dd202e58d669c4b4588c23	ASV4076	Bacteria	Planctomycetota	BD7-11	BD7-11	BD7-11	BD7-11	uncultured_bacterium	0	19	18	19	0	14	0	35	0	0	0	17	20	22	0	13	13	25	33	22	15	0	17	15	0	0	0	0	24	0	0	0	0	36	0	0	0	19	0	0	0
67471ca7f83ead9d96b772158e20bdf6	ASV2992	Bacteria	Planctomycetota	BD7-11	BD7-11	BD7-11	BD7-11	uncultured_planctomycete	0	0	5	0	17	20	0	0	32	0	25	5	0	0	0	0	16	0	0	0	25	44	0	0	0	37	0	0	17	0	24	0	23	0	12	29	0	0	35	0	0
bffcb56168a4d85a8769b36a3be9a1d5	ASV4023	Bacteria	Planctomycetota	BD7-11	BD7-11	BD7-11	BD7-11	uncultured_bacterium	12	0	0	0	19	19	12	0	0	0	0	21	6	0	0	0	0	0	11	0	0	15	16	17	5	11	0	18	0	0	13	0	28	0	60	0	0	8	12	0	0
0abbad84e72969990082a9da08cad579	ASV17	Bacteria	Planctomycetota	BD7-11	BD7-11	BD7-11	BD7-11	uncultured_Planctomycetales	0	0	11	0	0	0	16	0	0	17	24	0	0	0	0	0	0	24	0	25	0	0	28	0	0	0	20	17	0	0	16	14	38	0	18	0	16	0	0	0	0
62d5bb5f57d0f4cd07b24747d6d3d657	ASV1751	Bacteria	Planctomycetota	BD7-11	BD7-11	BD7-11	BD7-11	uncultured_bacterium	0	0	7	15	0	0	0	0	0	0	15	0	0	0	10	25	8	44	0	18	0	0	0	0	0	0	0	0	0	0	0	0	0	9	0	0	40	14	0	30	24
d2088fe81894486007e73f7ce0816008	ASV4531	Bacteria	Planctomycetota	BD7-11	BD7-11	BD7-11	BD7-11	uncultured_planctomycete	0	9	0	0	0	5	0	0	0	0	0	0	0	0	0	27	0	18	0	16	0	13	23	13	16	14	0	0	0	12	0	18	0	0	12	0	0	14	0	24	10
59b4a9e4886d3e741c26486e0287a02c	ASV1723	Bacteria	Planctomycetota	BD7-11	BD7-11	BD7-11	BD7-11	uncultured_bacterium	10	0	5	0	0	3	0	23	14	3	25	0	0	0	0	0	0	11	9	0	0	0	7	0	0	27	21	0	0	12	9	5	17	10	0	0	4	9	15	7	0
654115cbb2c5f23faa337f85569e633d	ASV3155	Bacteria	Planctomycetota	BD7-11	BD7-11	BD7-11	BD7-11	uncultured_bacterium	0	0	0	0	0	0	16	0	0	15	16	0	0	0	0	0	0	0	19	0	0	0	0	0	0	0	12	23	0	18	0	25	13	18	0	0	0	0	29	0	0
7906f714b1456da866f98ea1e1d55147	ASV2786	Bacteria	Planctomycetota	BD7-11	BD7-11	BD7-11	BD7-11	uncultured_bacterium	20	0	0	0	0	9	6	0	13	10	0	0	0	14	0	9	0	9	5	0	8	7	0	6	0	0	10	11	0	0	0	0	24	15	0	0	0	0	11	0	9
69ad9e9f3cdcea8eb1a1ca4de736c0bb	ASV1812	Bacteria	Planctomycetota	BD7-11	BD7-11	BD7-11	BD7-11	uncultured_bacterium	9	0	0	13	0	0	0	28	0	0	0	0	0	0	0	0	16	12	0	13	0	0	22	16	12	0	0	0	0	0	0	34	0	0	0	9	10	0	0	0	0
594e1047939df2099d06879fcb4b616c	ASV2357	Bacteria	Planctomycetota	BD7-11	BD7-11	BD7-11	BD7-11	uncultured_bacterium	0	0	11	0	0	0	0	0	0	0	12	0	12	0	12	0	0	23	0	0	0	0	20	0	0	0	21	0	0	0	0	0	0	16	0	0	0	0	10	21	0
70f03d8e70268583761102a872a5a10f	ASV1828	Bacteria	Planctomycetota	BD7-11	BD7-11	BD7-11	BD7-11	uncultured_bacterium	19	23	0	0	0	9	0	10	0	0	0	16	10	0	0	0	0	0	0	0	14	16	0	12	0	0	0	0	0	0	0	0	0	0	0	7	0	0	19	0	0
3abef1a55a437f14df4febcb8f6c5804	ASV422	Bacteria	Planctomycetota	BD7-11	BD7-11	BD7-11	BD7-11	uncultured_bacterium	0	4	0	0	0	0	12	12	9	5	0	8	6	0	0	6	0	0	0	11	0	4	4	5	0	11	9	10	7	0	0	5	10	0	0	0	4	0	12	0	0
12633c9f9c85effc8f67b649be4d93bb	ASV2872	Bacteria	Planctomycetota	BD7-11	BD7-11	BD7-11	BD7-11	uncultured_planctomycete	25	17	0	0	0	0	0	0	0	0	0	0	0	0	0	9	0	19	0	0	10	0	10	0	18	0	0	0	0	0	0	0	0	9	0	0	11	0	0	0	13
2e0ada1303bb4c0d72c8b95d677004c4	ASV358	Bacteria	Planctomycetota	BD7-11	BD7-11	BD7-11	BD7-11	uncultured_bacterium	0	0	0	0	0	0	0	0	0	0	0	0	0	0	0	0	0	0	0	0	0	24	0	0	0	0	0	0	0	40	24	0	21	0	0	0	0	0	0	0	0
0ac2b1c7b73f0d4bea2f77aa1fd66af2	ASV18	Bacteria	Planctomycetota	BD7-11	BD7-11	BD7-11	BD7-11	uncultured_bacterium	0	4	0	6	0	0	0	0	0	0	0	0	9	0	0	0	11	0	0	12	12	10	0	8	0	0	0	0	0	0	0	19	0	0	0	6	0	0	0	8	0
9ea7216d1e0a4d2ab51e3979493173a0	ASV1321	Bacteria	Planctomycetota	BD7-11	BD7-11	BD7-11	BD7-11	uncultured_marine	0	0	0	0	0	0	15	0	0	0	0	23	0	0	0	0	0	0	0	0	0	0	0	0	0	12	0	8	0	26	0	0	0	0	0	0	0	0	0	0	0
39724acc233fd41b313b3101c3614a74	ASV2933	Bacteria	Planctomycetota	BD7-11	BD7-11	BD7-11	BD7-11	uncultured_bacterium	0	0	0	0	0	0	0	12	0	0	0	0	0	3	0	0	0	0	0	5	0	0	0	0	0	0	0	6	0	20	0	7	9	3	0	0	3	0	5	0	0
af7cf57638165b405ae8b7266ea76c97	ASV3677	Bacteria	Planctomycetota	BD7-11	BD7-11	BD7-11	BD7-11	uncultured_planctomycete	0	0	0	0	0	0	0	0	0	0	0	0	0	0	0	0	0	0	0	0	0	0	0	29	0	21	0	0	0	0	0	0	20	0	0	0	0	0	14	0	0
c89619ce957885540192224abf749b30	ASV4243	Bacteria	Planctomycetota	BD7-11	BD7-11	BD7-11	BD7-11	uncultured_planctomycete	0	0	0	0	0	0	0	0	16	17	0	0	0	0	0	0	0	0	0	0	0	0	0	0	0	0	0	0	0	30	0	0	0	0	0	0	0	0	20	0	0
842753537f2b9d89891b0cb564de7756	ASV3337	Bacteria	Planctomycetota	BD7-11	BD7-11	BD7-11	BD7-11	NA	0	0	0	0	13	0	0	26	0	0	0	0	0	0	0	0	0	0	0	0	0	0	0	0	0	0	0	0	38	0	0	0	0	0	0	0	0	0	0	0	0
c9af228ad29744e418b1e3e5ab924958	ASV4103	Bacteria	Planctomycetota	BD7-11	BD7-11	BD7-11	BD7-11	uncultured_planctomycete	0	0	0	0	0	0	0	0	0	0	0	0	0	0	0	10	0	0	0	0	0	0	0	21	0	0	0	0	0	0	0	0	0	0	0	0	12	0	0	30	0
7061e4441b2b0a7c92d9ef2663860784	ASV2756	Bacteria	Planctomycetota	BD7-11	BD7-11	BD7-11	BD7-11	uncultured_bacterium	0	13	0	0	0	8	0	0	0	0	0	0	0	9	0	0	0	0	0	7	0	0	17	0	0	0	0	0	0	0	17	0	0	0	0	0	0	0	0	0	0
6d559e1ec124b181e69bc7c8429d40da	ASV878	Bacteria	Planctomycetota	BD7-11	BD7-11	BD7-11	BD7-11	uncultured_bacterium	0	0	0	0	0	0	0	0	0	0	0	0	0	0	0	0	0	0	0	0	0	0	0	0	0	19	11	0	0	0	0	0	15	0	0	0	0	0	18	0	0
5bf0b818ee40308c484aea7d929c0ca1	ASV714	Bacteria	Planctomycetota	BD7-11	BD7-11	BD7-11	BD7-11	uncultured_bacterium	0	0	0	0	0	0	0	0	0	0	0	5	0	11	0	0	12	0	0	0	0	10	0	0	0	0	0	0	13	0	11	0	0	0	0	0	0	0	0	0	0
226141795732cef638c4a9a805dedb87	ASV3370	Bacteria	Planctomycetota	BD7-11	BD7-11	BD7-11	BD7-11	uncultured_bacterium	0	0	0	0	0	0	8	13	0	0	0	0	0	0	0	0	0	0	0	14	0	0	0	0	0	8	0	0	0	4	7	0	7	0	0	0	0	0	0	0	0
be31eab246cc2317d48867b93687413f	ASV3986	Bacteria	Planctomycetota	BD7-11	BD7-11	BD7-11	BD7-11	uncultured_marine	0	0	0	0	0	0	0	0	0	0	0	0	0	16	0	0	0	0	0	0	0	0	0	0	0	8	0	0	0	0	0	0	0	0	15	0	0	0	0	8	0
8884c5cb3269a0629c1fe89be891e192	ASV2818	Bacteria	Planctomycetota	BD7-11	BD7-11	BD7-11	BD7-11	uncultured_bacterium	6	0	0	0	0	0	0	0	0	0	0	0	0	0	0	0	0	0	0	16	0	0	7	12	9	0	0	0	0	0	0	0	0	0	0	7	0	0	0	0	0
4c9a0352e871deeef1b379fb985e33e8	ASV581	Bacteria	Planctomycetota	BD7-11	BD7-11	BD7-11	BD7-11	uncultured_bacterium	0	0	0	0	0	8	6	11	0	0	0	0	0	7	6	0	0	0	0	0	0	0	0	0	0	9	0	0	9	0	0	0	0	0	0	0	0	0	0	0	0
c110c9fb3dcd1043fcb72c12455e1fdc	ASV4172	Bacteria	Planctomycetota	BD7-11	BD7-11	BD7-11	BD7-11	uncultured_planctomycete	0	0	0	0	3	8	0	0	0	0	0	0	0	0	0	0	0	0	0	0	0	0	4	0	0	0	0	9	4	0	0	0	13	4	0	0	0	0	0	0	0
5ab53c29be7a130a57e16efc6e852e32	ASV685	Bacteria	Planctomycetota	BD7-11	BD7-11	BD7-11	BD7-11	uncultured_bacterium	0	0	0	11	0	0	0	0	0	0	0	0	0	0	0	0	0	0	3	0	0	0	0	0	0	5	0	0	0	0	7	11	13	0	0	0	0	0	0	0	0
3b982654af5b2bed32724d52dcf7f4ff	ASV444	Bacteria	Planctomycetota	BD7-11	BD7-11	BD7-11	BD7-11	NA	0	0	13	0	0	0	0	0	0	0	0	0	0	0	0	0	0	0	0	0	0	0	0	0	0	0	0	0	0	0	0	0	27	0	0	0	0	0	0	0	0
71e239a81372cbdeb34420a554ca3763	ASV1836	Bacteria	Planctomycetota	BD7-11	BD7-11	BD7-11	BD7-11	uncultured_bacterium	0	0	0	0	0	0	0	0	0	0	0	0	0	0	0	0	0	0	23	9	0	0	0	0	0	0	0	16	0	0	0	0	0	0	0	0	0	0	0	0	0
0892453ce4de1f98fbb0e3a551ee6cec	ASV3181	Bacteria	Planctomycetota	BD7-11	BD7-11	BD7-11	BD7-11	uncultured_planctomycete	0	0	0	0	0	0	0	0	0	0	0	0	0	8	0	0	0	7	0	0	0	0	0	0	0	0	0	0	0	0	0	0	0	0	0	0	0	0	0	32	0
a382fc986ce24e61797698a79657c90c	ASV3519	Bacteria	Planctomycetota	BD7-11	BD7-11	BD7-11	BD7-11	uncultured_bacterium	0	0	0	0	0	0	17	0	0	0	0	0	0	0	0	0	0	0	0	0	0	0	0	0	0	0	0	11	17	0	0	0	0	0	0	0	0	0	0	0	0
415b9756ab503db7424c526ca281cb53	ASV2266	Bacteria	Planctomycetota	BD7-11	BD7-11	BD7-11	BD7-11	uncultured_marine	0	0	0	0	0	0	0	0	0	0	0	0	0	0	0	0	0	0	0	32	0	0	0	0	9	0	0	0	0	0	0	0	0	0	0	0	0	0	0	0	0
51eb2041175dccce53efdd89fde93e2b	ASV1671	Bacteria	Planctomycetota	BD7-11	BD7-11	BD7-11	BD7-11	uncultured_bacterium	0	0	0	0	0	0	0	0	0	0	0	0	0	0	0	0	0	0	0	0	0	0	0	0	0	0	0	0	0	0	0	0	0	0	3	10	0	0	0	28	0
2651c6914d189779e43f819e619cec6f	ASV2617	Bacteria	Planctomycetota	BD7-11	BD7-11	BD7-11	BD7-11	uncultured_bacterium	0	0	0	0	0	0	0	0	0	0	0	0	0	0	0	0	0	0	32	0	0	0	0	0	0	6	0	0	0	0	0	0	0	0	0	0	0	0	0	0	0
485e7cabd0f865f984a0ca84c3eac7d0	ASV2299	Bacteria	Planctomycetota	BD7-11	BD7-11	BD7-11	BD7-11	uncultured_Planctomycetia	12	0	0	0	0	0	0	0	0	0	0	0	0	0	0	0	8	0	0	17	0	0	0	0	0	0	0	0	0	0	0	0	0	0	0	0	0	0	0	0	0
e07adbb800c02abe73840893e9f200f0	ASV4795	Bacteria	Planctomycetota	BD7-11	BD7-11	BD7-11	BD7-11	uncultured_bacterium	0	0	0	0	0	0	0	0	0	0	0	0	0	0	0	6	0	0	0	0	29	0	0	0	0	0	0	0	0	0	0	0	0	0	0	0	0	0	0	0	0
c5bda1bcd906a90bdf6420b997690844	ASV4069	Bacteria	Planctomycetota	BD7-11	BD7-11	BD7-11	BD7-11	uncultured_bacterium	0	0	0	0	0	0	0	10	9	0	0	0	0	0	0	0	0	0	0	0	0	0	0	0	0	4	0	0	0	11	0	0	0	0	0	0	0	0	0	0	0
6b38e59b88f46587a97616cae520d3e1	ASV833	Bacteria	Planctomycetota	BD7-11	BD7-11	BD7-11	BD7-11	uncultured_bacterium	0	13	0	0	0	0	0	0	0	0	0	0	0	0	0	0	0	0	0	0	0	0	0	17	0	0	0	0	0	0	0	0	0	0	0	0	0	0	0	0	0
9a015ca8c77dbab99f25ed7c3ca612eb	ASV1215	Bacteria	Planctomycetota	BD7-11	BD7-11	BD7-11	BD7-11	uncultured_bacterium	0	0	11	0	0	0	0	0	0	0	0	0	0	0	0	0	0	17	0	0	0	0	0	0	0	0	0	0	0	0	0	0	0	0	0	0	0	0	0	0	0
a745e8605c7e74e2da1291acbd087303	ASV3528	Bacteria	Planctomycetota	BD7-11	BD7-11	BD7-11	BD7-11	uncultured_Planctomycetales	0	0	0	0	5	6	0	0	0	0	0	0	0	0	0	0	0	0	0	0	0	5	0	0	12	0	0	0	0	0	0	0	0	0	0	0	0	0	0	0	0
f822f57836f6a390d39dafc18b44d5b1	ASV5226	Bacteria	Planctomycetota	BD7-11	BD7-11	BD7-11	BD7-11	NA	0	0	0	0	0	0	0	26	0	0	0	0	0	0	0	0	0	0	0	0	0	0	0	0	0	0	0	0	0	0	0	0	0	0	0	0	0	0	0	0	0
72d31c4cb3264a9c33e8cc3630a9c1ed	ASV1843	Bacteria	Planctomycetota	BD7-11	BD7-11	BD7-11	BD7-11	uncultured_bacterium	0	0	11	0	0	0	0	0	0	0	0	0	0	9	0	0	0	0	0	0	0	0	0	0	0	0	0	0	0	5	0	0	0	0	0	0	0	0	0	0	0
d6734cb840decaa37f936983fbe1b583	ASV4545	Bacteria	Planctomycetota	BD7-11	BD7-11	BD7-11	BD7-11	uncultured_bacterium	0	0	0	0	0	0	0	0	0	0	0	0	0	0	0	0	0	16	0	0	0	0	0	0	8	0	0	0	0	0	0	0	0	0	0	0	0	0	0	0	0
2253c88e90455cb91ed763311fe39f39	ASV2605	Bacteria	Planctomycetota	BD7-11	BD7-11	BD7-11	BD7-11	uncultured_planctomycete	0	0	0	0	0	0	0	0	0	0	0	0	0	0	0	0	0	0	0	0	0	0	0	12	0	0	0	0	0	4	0	6	0	0	0	0	0	0	0	0	0
c6ffb85b0063cb032a164eb2192309c1	ASV4086	Bacteria	Planctomycetota	BD7-11	BD7-11	BD7-11	BD7-11	uncultured_bacterium	0	0	0	0	0	0	0	20	0	0	0	0	0	0	0	0	0	0	0	0	0	0	0	0	0	0	0	0	0	0	0	0	0	0	0	0	0	0	0	0	0
42d4a512ba91ce829c23cc060f85f744	ASV1602	Bacteria	Proteobacteria	Gammaproteobacteria	BD72BR169	BD72BR169	BD72BR169	uncultured_bacterium	0	0	0	0	0	0	0	0	0	0	0	0	0	0	0	0	0	0	0	0	0	0	0	0	0	0	0	0	0	0	16	0	0	0	0	0	0	0	0	4	0
7594faf9c2a234b28523d28100bac74f	ASV2770	Bacteria	Proteobacteria	Gammaproteobacteria	BD7-8	BD7-8	BD7-8	uncultured_bacterium	0	0	0	0	0	0	224	223	149	102	442	0	0	0	0	0	0	0	164	0	0	0	0	0	0	168	227	219	141	102	0	117	91	261	0	0	0	0	188	0	0
c9526a14e7dc0e87a37488da41352f26	ASV4231	Bacteria	Proteobacteria	Gammaproteobacteria	BD7-8	BD7-8	BD7-8	uncultured_bacterium	73	95	130	50	34	41	40	51	0	0	40	34	117	0	79	156	49	159	40	140	111	68	0	79	88	0	50	0	0	0	85	0	0	78	0	0	71	77	0	122	61
626c5465c847c63cbcf1a63fef89d821	ASV2371	Bacteria	Proteobacteria	Gammaproteobacteria	BD7-8	BD7-8	BD7-8	uncultured_bacterium	0	15	0	22	26	31	38	39	30	0	62	11	23	20	0	22	19	0	29	22	0	0	26	14	15	30	40	32	0	0	23	17	0	24	13	19	7	26	19	0	0
c1b10daea54e935c5850cb79f178b652	ASV4038	Bacteria	Proteobacteria	Gammaproteobacteria	BD7-8	BD7-8	BD7-8	uncultured_bacterium	0	0	0	7	0	8	0	0	0	0	55	8	20	24	0	0	0	0	47	0	0	0	11	21	0	34	0	0	0	0	0	0	10	62	0	18	0	0	65	10	0
8e3aef8057984ba051db52eb1cc53c94	ASV1160	Bacteria	Proteobacteria	Gammaproteobacteria	BD7-8	BD7-8	BD7-8	uncultured_bacterium	0	0	0	0	0	0	139	34	30	0	0	0	14	0	0	0	0	0	0	0	0	0	0	0	0	0	0	56	48	95	0	0	0	0	0	0	0	0	0	0	0
a61e647f69c79867da4b643d3f108e68	ASV3486	Bacteria	Proteobacteria	Gammaproteobacteria	BD7-8	BD7-8	BD7-8	uncultured_bacterium	0	0	0	0	0	0	0	0	0	0	44	0	0	60	0	0	0	0	0	0	0	0	56	0	0	0	0	0	0	0	0	0	0	0	0	99	0	0	0	0	88
879888a5b6eef49f98e71cd06b626efa	ASV3179	Bacteria	Proteobacteria	Gammaproteobacteria	BD7-8	BD7-8	BD7-8	uncultured_bacterium	0	0	0	0	0	0	24	0	0	0	0	0	0	0	24	0	0	12	0	0	0	0	0	0	0	0	0	0	0	12	0	0	0	0	0	0	0	0	0	0	0
8ea6d767f828a09909e8442cab70dcc1	ASV1176	Bacteria	Proteobacteria	Gammaproteobacteria	BD7-8	BD7-8	BD7-8	NA	0	0	0	0	0	0	0	0	0	0	0	0	0	0	0	0	0	0	0	0	0	0	0	0	0	0	0	0	0	0	0	0	0	0	0	0	0	0	0	51	0
a08abd740c613a389e58fec3492e4a3b	ASV3446	Bacteria	Proteobacteria	Gammaproteobacteria	BD7-8	BD7-8	BD7-8	uncultured_gamma	0	0	0	0	0	0	30	0	0	0	0	0	0	0	0	0	0	0	0	0	0	0	0	0	0	0	0	0	0	15	0	0	0	0	0	0	0	0	0	0	0
fab4bac68681bdaf788cd62784f62e20	ASV5290	Bacteria	Bdellovibrionota	Bdellovibrionia	Bdellovibrionales	Bdellovibrionaceae	Bdellovibrio	uncultured_marine	38	0	25	32	52	34	36	81	53	12	0	13	21	0	0	27	29	0	41	30	30	55	26	49	33	65	41	0	17	0	34	45	47	0	29	30	19	45	57	0	41
95dfbba72f5a65ac0a861788c0f85876	ASV2045	Bacteria	Bdellovibrionota	Bdellovibrionia	Bdellovibrionales	Bdellovibrionaceae	Bdellovibrio	uncultured_bacterium	70	38	0	35	0	0	0	0	0	0	19	4	0	0	62	57	32	116	7	87	30	26	31	12	102	0	28	0	0	8	0	3	0	24	0	0	125	38	8	36	78
6b67a3760bbf3db3993841214fcdb62b	ASV834	Bacteria	Bdellovibrionota	Bdellovibrionia	Bdellovibrionales	Bdellovibrionaceae	Bdellovibrio	uncultured_bacterium	0	12	71	7	38	9	16	16	12	11	0	26	25	47	17	8	25	7	29	20	12	16	16	20	0	49	0	30	0	24	31	0	13	21	26	39	0	27	12	0	14
e3f8960ed85bcd72397f97b5b959ae12	ASV4761	Bacteria	Bdellovibrionota	Bdellovibrionia	Bdellovibrionales	Bdellovibrionaceae	Bdellovibrio	uncultured_marine	46	34	20	0	44	0	0	0	0	0	0	28	0	27	18	28	36	43	0	32	28	0	26	0	40	31	0	19	0	23	43	0	0	18	55	41	42	0	0	24	0
ee17649f852494aca35f2e2ed3fe672f	ASV5040	Bacteria	Bdellovibrionota	Bdellovibrionia	Bdellovibrionales	Bdellovibrionaceae	Bdellovibrio	marine_metagenome	23	6	17	0	0	0	21	23	31	8	9	0	0	9	14	9	15	14	0	20	9	12	32	11	9	33	7	0	0	6	32	25	12	4	0	17	0	26	19	11	0
2bf5816d178d8239038b9e84bc845e4a	ASV319	Bacteria	Bdellovibrionota	Bdellovibrionia	Bdellovibrionales	Bdellovibrionaceae	Bdellovibrio	uncultured_bacterium	31	10	20	0	15	21	0	0	10	3	8	21	16	29	20	10	13	7	10	17	22	18	18	16	7	9	0	17	15	0	22	5	13	0	6	6	5	13	5	13	8
a1f007894a641a028f2a8c2b5bce3dc8	ASV3404	Bacteria	Bdellovibrionota	Bdellovibrionia	Bdellovibrionales	Bdellovibrionaceae	Bdellovibrio	uncultured_delta	30	46	0	25	0	13	0	0	0	0	0	26	0	12	0	0	25	15	0	45	42	18	27	31	19	0	0	0	0	0	0	0	0	0	0	59	29	0	0	0	29
950fde635dc93c5d1570e9e3fc3e0ac5	ASV2536	Bacteria	Bdellovibrionota	Bdellovibrionia	Bdellovibrionales	Bdellovibrionaceae	Bdellovibrio	NA	0	0	0	0	0	0	17	57	4	12	97	0	0	0	0	0	0	0	33	0	0	0	0	0	0	0	7	26	0	20	0	20	5	55	0	0	0	0	62	0	0
7b8fdf9c46464b45ec42a03aa969c56b	ASV966	Bacteria	Bdellovibrionota	Bdellovibrionia	Bdellovibrionales	Bdellovibrionaceae	Bdellovibrio	uncultured_delta	0	0	52	0	0	0	0	0	0	23	19	0	0	0	64	28	0	0	8	0	0	0	0	0	0	0	0	0	0	0	0	0	0	22	0	0	0	45	0	90	0
11f62d7a4f0bc8abaea0bda07853c88b	ASV1368	Bacteria	Bdellovibrionota	Bdellovibrionia	Bdellovibrionales	Bdellovibrionaceae	Bdellovibrio	NA	0	0	0	10	0	20	48	0	9	12	0	21	0	0	0	0	0	0	9	0	19	0	12	0	0	0	0	48	0	57	16	0	0	14	8	0	0	0	0	0	0
e73884dd593b782a3ad30a1c66430f7f	ASV4922	Bacteria	Bdellovibrionota	Bdellovibrionia	Bdellovibrionales	Bdellovibrionaceae	Bdellovibrio	NA	0	0	0	0	0	0	28	25	14	0	0	0	0	0	0	0	0	0	0	0	0	0	0	0	0	39	18	26	17	0	0	20	32	24	0	0	0	0	13	0	0
e195dd6ea512a283aa0b69d21cf808f6	ASV4875	Bacteria	Bdellovibrionota	Bdellovibrionia	Bdellovibrionales	Bdellovibrionaceae	Bdellovibrio	uncultured_marine	0	0	0	9	26	0	13	0	0	13	0	0	11	14	10	0	0	17	0	0	0	0	12	0	0	0	0	36	8	0	17	0	0	0	0	0	0	21	0	11	0
d8aa20f33b17f37b6056a131a38f22c1	ASV4467	Bacteria	Bdellovibrionota	Bdellovibrionia	Bdellovibrionales	Bdellovibrionaceae	Bdellovibrio	uncultured_delta	0	0	0	0	0	0	44	15	0	0	8	0	0	0	0	21	0	0	0	0	0	0	0	0	0	9	0	44	18	0	0	0	0	22	16	0	0	0	18	0	0
09f2aa7f8be63f6d002f5b6a14044ebc	ASV1334	Bacteria	Bdellovibrionota	Bdellovibrionia	Bdellovibrionales	Bdellovibrionaceae	Bdellovibrio	NA	0	0	0	0	0	0	21	45	26	0	14	0	0	0	0	0	0	0	0	0	0	0	0	0	0	23	7	0	6	0	0	28	17	15	0	0	0	0	31	0	0
d0aa2e318b406aad60b2dad62d07d2aa	ASV4397	Bacteria	Bdellovibrionota	Bdellovibrionia	Bdellovibrionales	Bdellovibrionaceae	Bdellovibrio	uncultured_organism	8	0	0	10	12	6	0	21	0	0	0	9	0	0	5	7	0	0	10	0	4	7	6	22	0	0	0	6	0	8	16	0	10	0	0	20	0	0	4	0	2
197361f3605aa73217b880ae57940064	ASV3079	Bacteria	Bdellovibrionota	Bdellovibrionia	Bdellovibrionales	Bdellovibrionaceae	Bdellovibrio	NA	0	0	11	0	21	0	0	0	0	0	0	18	0	0	0	0	12	0	5	0	0	0	0	0	0	4	0	0	0	4	8	0	0	0	84	31	0	0	0	0	0
ac1a8f5eb6efca633792b558baa32b00	ASV3617	Bacteria	Bdellovibrionota	Bdellovibrionia	Bdellovibrionales	Bdellovibrionaceae	Bdellovibrio	uncultured_bacterium	0	0	0	0	0	0	0	6	0	4	65	0	0	0	11	24	0	16	0	0	0	0	0	0	0	0	0	0	0	0	0	0	0	0	0	19	13	0	0	33	0
fb7b9192db0f343c9049f25599e7ab0e	ASV5303	Bacteria	Bdellovibrionota	Bdellovibrionia	Bdellovibrionales	Bdellovibrionaceae	Bdellovibrio	NA	14	14	0	10	0	0	0	0	0	0	0	0	15	0	13	0	0	13	0	4	16	13	0	0	0	0	0	0	0	5	10	0	0	0	0	0	0	0	7	23	0
08767a195b1b7478afd52d8c880d5afe	ASV2813	Bacteria	Bdellovibrionota	Bdellovibrionia	Bdellovibrionales	Bdellovibrionaceae	Bdellovibrio	uncultured_marine	0	15	0	0	25	0	0	0	0	0	0	0	0	0	0	0	0	16	0	21	22	0	17	0	0	0	0	0	0	0	0	0	0	0	27	0	0	11	0	0	15
5bab84723b65827956be8d802a4619b1	ASV705	Bacteria	Bdellovibrionota	Bdellovibrionia	Bdellovibrionales	Bdellovibrionaceae	Bdellovibrio	uncultured_bacterium	0	0	4	0	8	3	0	0	12	6	0	0	0	6	0	0	10	0	13	14	0	0	19	18	0	0	0	0	0	0	0	0	0	0	15	21	0	9	4	0	5
62bcd700167b647e4e7bd546c5cd32de	ASV1749	Bacteria	Bdellovibrionota	Bdellovibrionia	Bdellovibrionales	Bdellovibrionaceae	Bdellovibrio	uncultured_bacterium	0	0	21	0	0	0	24	0	0	0	11	0	17	0	0	12	0	0	0	0	0	11	0	0	0	0	0	17	0	0	8	0	0	0	0	0	0	21	0	0	0
6e822a4c6fb679771fb9960b6f3a3211	ASV898	Bacteria	Bdellovibrionota	Bdellovibrionia	Bdellovibrionales	Bdellovibrionaceae	Bdellovibrio	uncultured_marine	22	0	0	0	0	0	0	0	0	0	18	0	0	0	0	0	0	0	0	0	0	0	0	0	33	0	0	0	0	0	0	0	0	0	0	40	18	0	0	0	0
278388c336ecaf6f7999190a2958798a	ASV3093	Bacteria	Bdellovibrionota	Bdellovibrionia	Bdellovibrionales	Bdellovibrionaceae	Bdellovibrio	uncultured_bacterium	0	0	0	0	0	0	0	20	0	10	0	0	0	0	0	0	0	0	0	0	0	0	0	0	0	45	0	0	0	6	0	9	31	0	0	0	0	0	0	0	0
0747e07792f1d7e5f0f04cb6eb4de632	ASV2439	Bacteria	Bdellovibrionota	Bdellovibrionia	Bdellovibrionales	Bdellovibrionaceae	Bdellovibrio	uncultured_bacterium	0	0	21	0	0	0	0	5	0	0	0	0	0	9	14	0	0	0	0	11	0	0	0	0	0	0	0	0	21	0	0	0	0	0	0	0	0	0	0	0	0
d4ef45e121090d478dd12c1abd550491	ASV4436	Bacteria	Bdellovibrionota	Bdellovibrionia	Bdellovibrionales	Bdellovibrionaceae	Bdellovibrio	uncultured_bacterium	0	0	7	0	7	0	0	0	0	0	0	7	20	0	0	0	9	0	0	0	6	0	0	0	0	0	0	0	0	0	0	0	0	0	0	0	0	0	0	10	0
ec9a2a63620f4193f796507cf8996cc9	ASV4982	Bacteria	Bdellovibrionota	Bdellovibrionia	Bdellovibrionales	Bdellovibrionaceae	Bdellovibrio	uncultured_bacterium	0	0	0	0	17	21	0	0	0	0	0	0	0	0	0	0	0	0	0	0	0	8	21	0	0	0	0	0	0	0	0	0	0	0	0	0	0	0	0	0	0
e393e8b3b6ad309ae627b24e631d563b	ASV4883	Bacteria	Bdellovibrionota	Bdellovibrionia	Bdellovibrionales	Bdellovibrionaceae	Bdellovibrio	NA	0	0	0	0	20	0	0	0	0	0	0	0	0	0	0	0	0	13	0	7	0	0	0	0	0	0	0	0	0	0	0	0	0	0	0	0	0	20	0	0	15
92e5a7896973c8cd4759227e04e45abf	ASV2025	Bacteria	Bdellovibrionota	Bdellovibrionia	Bdellovibrionales	Bdellovibrionaceae	Bdellovibrio	uncultured_marine	0	0	0	16	0	0	0	0	0	0	0	0	0	0	0	0	0	0	0	0	0	9	0	0	0	0	0	20	0	12	0	0	0	0	0	17	0	0	0	0	0
9dc90981b714a815c04cab838898e351	ASV1294	Bacteria	Bdellovibrionota	Bdellovibrionia	Bdellovibrionales	Bdellovibrionaceae	Bdellovibrio	uncultured_marine	13	0	0	0	0	0	0	0	0	0	0	0	0	0	0	0	0	8	12	0	0	0	0	0	0	0	0	0	0	0	0	10	0	0	0	0	0	10	0	0	0
fa68a2d889afb2b16f6e099bf955bfb4	ASV5280	Bacteria	Bdellovibrionota	Bdellovibrionia	Bdellovibrionales	Bdellovibrionaceae	Bdellovibrio	uncultured_bacterium	5	0	0	0	0	0	0	0	0	0	20	0	0	0	0	13	0	0	4	0	0	0	0	0	0	0	0	0	0	0	0	0	0	0	0	9	14	0	0	0	5
90a361e9f5c69f4f110d12ee6e9e5cc2	ASV2002	Bacteria	Bdellovibrionota	Bdellovibrionia	Bdellovibrionales	Bdellovibrionaceae	Bdellovibrio	uncultured_bacterium	0	0	8	0	0	0	0	0	0	0	0	14	0	0	0	0	0	0	0	0	0	0	0	0	0	5	0	0	0	0	0	0	6	0	23	7	0	0	0	0	0
8e0dbe2096567b70df454d398f6dee2b	ASV1159	Bacteria	Bdellovibrionota	Bdellovibrionia	Bdellovibrionales	Bdellovibrionaceae	Bdellovibrio	uncultured_marine	0	0	0	0	0	0	48	0	0	0	0	0	16	0	0	0	0	0	0	0	0	0	0	0	0	0	0	0	0	0	0	0	0	0	0	0	0	0	0	0	0
4422b1f173049d62b161805ead313cf1	ASV2667	Bacteria	Bdellovibrionota	Bdellovibrionia	Bdellovibrionales	Bdellovibrionaceae	Bdellovibrio	NA	0	0	0	0	18	0	0	0	0	0	0	0	0	18	0	0	0	0	0	0	0	0	0	0	0	0	0	0	0	0	0	0	0	0	0	0	0	0	0	0	0
50476de7d2b1f50549085be599fa7116	ASV2961	Bacteria	Bdellovibrionota	Bdellovibrionia	Bdellovibrionales	Bdellovibrionaceae	Bdellovibrio	marine_metagenome	0	0	0	0	11	0	0	0	0	0	0	0	0	0	0	0	10	0	0	0	0	0	15	0	0	0	0	0	0	0	0	0	0	0	5	0	21	0	0	0	0
e97dcb4b446c8ebe0e68c69d5c19ad4a	ASV4871	Bacteria	Bdellovibrionota	Bdellovibrionia	Bdellovibrionales	Bdellovibrionaceae	Bdellovibrio	uncultured_bacterium	0	0	0	11	0	9	0	0	9	0	0	0	0	0	0	0	0	0	0	0	0	0	0	0	0	0	0	0	0	0	19	0	0	0	0	0	11	0	0	0	0
1db3217fafabec70bd2f3ac61c7e774c	ASV215	Bacteria	Bdellovibrionota	Bdellovibrionia	Bdellovibrionales	Bdellovibrionaceae	Bdellovibrio	uncultured_organism	0	0	0	0	0	0	0	0	0	0	0	0	0	0	0	0	0	9	0	0	0	0	0	13	0	0	0	0	0	0	0	0	0	3	0	15	0	0	0	10	8
fca195f6075a57461b4200adfd63c98e	ASV5331	Bacteria	Bdellovibrionota	Bdellovibrionia	Bdellovibrionales	Bdellovibrionaceae	Bdellovibrio	uncultured_bacterium	0	0	0	0	0	0	0	0	0	0	0	10	0	0	10	8	0	0	0	11	0	0	0	14	0	0	0	0	0	0	0	0	0	0	0	0	0	4	0	0	0
2ca53abc026e1fdefdf815255de23532	ASV332	Bacteria	Bdellovibrionota	Bdellovibrionia	Bdellovibrionales	Bdellovibrionaceae	Bdellovibrio	NA	0	0	27	0	0	0	0	0	0	0	0	0	0	0	10	0	0	0	0	0	0	0	0	10	0	0	0	0	0	0	0	0	0	0	0	9	0	0	0	0	0
4b6291eb2673f74aabf5b053ee368fbe	ASV565	Bacteria	Bdellovibrionota	Bdellovibrionia	Bdellovibrionales	Bdellovibrionaceae	Bdellovibrio	uncultured_bacterium	0	0	0	0	0	0	0	0	0	10	13	0	0	0	0	0	0	0	0	0	0	0	0	0	0	0	0	0	0	6	0	0	0	17	0	0	0	0	10	0	0
fa4827d5355e552bac8d7ac1fa1a7e5e	ASV5288	Bacteria	Bdellovibrionota	Bdellovibrionia	Bdellovibrionales	Bdellovibrionaceae	Bdellovibrio	NA	11	0	0	0	0	0	0	0	14	0	0	0	0	0	0	0	0	0	0	0	0	0	0	0	0	0	0	0	0	0	0	0	0	0	14	9	0	0	7	0	0
75170e033248cfe3c3e45cd397c49cc2	ASV3006	Bacteria	Bdellovibrionota	Bdellovibrionia	Bdellovibrionales	Bdellovibrionaceae	Bdellovibrio	uncultured_bacterium	0	3	0	0	0	0	0	0	0	0	0	0	0	0	7	5	0	7	0	8	11	8	0	0	0	0	0	0	0	0	0	0	0	0	0	0	0	0	0	0	0
c527dd2c2b07e2889ed2c05b16c2aed1	ASV4194	Bacteria	Bdellovibrionota	Bdellovibrionia	Bdellovibrionales	Bdellovibrionaceae	Bdellovibrio	uncultured_marine	0	0	0	0	0	0	0	14	0	0	0	0	0	0	0	0	0	0	0	0	0	0	0	0	0	22	0	7	0	7	0	0	0	0	0	0	0	0	0	0	0
edf194110fe134d9d5f6369fd18e8b45	ASV5024	Bacteria	Bdellovibrionota	Bdellovibrionia	Bdellovibrionales	Bdellovibrionaceae	Bdellovibrio	uncultured_bacterium	0	0	0	0	0	0	0	0	0	0	0	0	0	0	0	9	5	0	0	0	0	0	0	0	6	0	0	0	0	0	0	0	0	0	0	14	7	0	0	0	9
bb64752e982b4d55f16684e1a43c4eb6	ASV3928	Bacteria	Bdellovibrionota	Bdellovibrionia	Bdellovibrionales	Bdellovibrionaceae	Bdellovibrio	marine_metagenome	12	0	0	0	0	0	0	0	0	0	0	0	0	6	0	0	0	0	0	0	0	0	8	0	0	0	0	0	0	0	0	0	0	0	0	0	0	15	0	0	0
e9c5dcbc0c6b8d5605aebf25228d7304	ASV4819	Bacteria	Bdellovibrionota	Bdellovibrionia	Bdellovibrionales	Bdellovibrionaceae	Bdellovibrio	uncultured_organism	0	0	24	0	0	0	0	0	0	0	0	0	15	0	0	0	0	0	0	0	0	0	0	0	0	0	0	0	0	0	0	0	0	0	0	0	0	0	0	0	0
887d621b1dee355e78d530e591b92aca	ASV2506	Bacteria	Bdellovibrionota	Bdellovibrionia	Bdellovibrionales	Bdellovibrionaceae	Bdellovibrio	uncultured_bacterium	0	0	0	0	0	0	5	0	0	0	0	0	0	0	0	0	0	0	0	0	0	0	0	0	0	27	0	0	0	0	0	0	15	0	0	0	0	0	0	0	0
3bf5cb65bb6a6c77676de5b2e61ed480	ASV450	Bacteria	Bdellovibrionota	Bdellovibrionia	Bdellovibrionales	Bdellovibrionaceae	Bdellovibrio	uncultured_bacterium	0	0	0	0	0	0	0	0	0	0	0	0	0	0	0	0	0	0	0	0	0	0	0	0	0	12	0	0	0	0	0	10	11	5	0	0	0	0	5	0	0
86fcaa3bd6bd82d42b96031f17ad5839	ASV1970	Bacteria	Bdellovibrionota	Bdellovibrionia	Bdellovibrionales	Bdellovibrionaceae	Bdellovibrio	uncultured_bacterium	0	0	0	0	0	0	7	12	0	0	0	0	0	0	0	0	0	0	0	0	0	0	0	0	0	0	0	9	0	0	0	0	4	0	0	0	0	0	9	0	0
4e88d892ea2f9a25944d3a7d52978ae0	ASV635	Bacteria	Bdellovibrionota	Bdellovibrionia	Bdellovibrionales	Bdellovibrionaceae	Bdellovibrio	uncultured_gamma	0	4	0	10	0	3	0	6	0	0	0	0	0	0	0	0	0	0	0	0	0	0	0	0	0	4	0	0	0	0	0	0	0	0	0	0	6	0	0	0	0
b97a2795d0197835e0efcb0c1054baae	ASV3820	Bacteria	Bdellovibrionota	Bdellovibrionia	Bdellovibrionales	Bdellovibrionaceae	Bdellovibrio	uncultured_marine	0	0	0	0	0	0	0	0	0	0	0	36	0	0	0	0	0	0	0	0	0	0	0	0	0	0	0	0	0	0	0	0	0	0	0	0	0	0	0	0	0
26639fc2255af73e2600970afa1a25cf	ASV2905	Bacteria	Bdellovibrionota	Bdellovibrionia	Bdellovibrionales	Bdellovibrionaceae	Bdellovibrio	uncultured_bacterium	0	0	0	0	0	0	0	0	0	0	0	0	0	0	0	0	0	0	0	0	31	0	0	0	0	0	0	0	0	0	0	0	0	0	0	0	0	0	0	0	0
3a48ef272eb773c2078f2405ec9d66cc	ASV412	Bacteria	Bdellovibrionota	Bdellovibrionia	Bdellovibrionales	Bdellovibrionaceae	Bdellovibrio	marine_metagenome	0	0	0	0	24	0	0	0	0	0	0	0	0	0	0	0	0	0	7	0	0	0	0	0	0	0	0	0	0	0	0	0	0	0	0	0	0	0	0	0	0
fe84bb6ddbdbb9a438ef735066a5ecd5	ASV5362	Bacteria	Bdellovibrionota	Bdellovibrionia	Bdellovibrionales	Bdellovibrionaceae	Bdellovibrio	uncultured_bacterium	0	0	9	0	0	0	0	0	0	0	0	0	0	0	0	0	0	0	0	0	0	0	0	0	0	0	0	0	0	0	0	0	0	0	0	0	0	7	0	0	0
8620373d3ce05abd55f85e080c200c29	ASV3268	Bacteria	Bdellovibrionota	Bdellovibrionia	Bdellovibrionales	Bdellovibrionaceae	Bdellovibrio	uncultured_delta	0	0	0	0	0	0	0	9	0	0	0	0	0	0	0	0	0	0	0	0	0	0	0	0	0	12	0	0	0	0	0	0	0	0	0	0	0	0	9	0	0
e5b1aaa1e102a15896576a9c6de6a548	ASV4772	Bacteria	Bdellovibrionota	Bdellovibrionia	Bdellovibrionales	Bdellovibrionaceae	Bdellovibrio	NA	0	0	0	0	0	0	0	0	0	0	0	0	0	0	0	0	0	0	0	0	0	0	0	0	0	0	0	0	0	0	0	0	0	0	0	19	0	0	0	0	10
2053dbbf72db6cfc10e860592be6997d	ASV2594	Bacteria	Bdellovibrionota	Bdellovibrionia	Bdellovibrionales	Bdellovibrionaceae	Bdellovibrio	uncultured_bacterium	7	0	0	0	0	0	0	0	0	0	0	0	0	0	0	0	0	0	0	0	0	0	0	0	0	0	0	0	0	0	0	0	0	0	5	10	0	0	0	0	6
54b78d2577d8186f74e4a936abf33988	ASV1690	Bacteria	Bdellovibrionota	Bdellovibrionia	Bdellovibrionales	Bdellovibrionaceae	Bdellovibrio	uncultured_bacterium	0	0	0	0	0	0	0	0	0	0	0	0	0	0	0	0	0	0	0	0	0	0	0	0	0	0	0	4	0	0	0	0	0	0	0	0	0	0	0	0	0
5ddaf8695b1cee7abf5c7deb55164930	ASV758	Bacteria	Bdellovibrionota	Bdellovibrionia	Bdellovibrionales	Bdellovibrionaceae	OM27_clade	uncultured_bacterium	33	59	93	82	62	61	35	0	19	0	34	53	38	42	33	64	20	52	55	59	21	64	26	0	42	48	32	0	33	0	95	23	0	28	0	0	34	58	34	0	21
1bfeaaa1f3f5e25d6bb6a92713e92e59	ASV173	Bacteria	Bdellovibrionota	Bdellovibrionia	Bdellovibrionales	Bdellovibrionaceae	OM27_clade	uncultured_bacterium	30	43	57	72	57	54	53	25	0	0	21	62	51	45	22	44	16	64	40	39	28	54	84	20	12	21	0	48	17	0	102	0	0	25	12	21	22	47	44	32	10
c949aafc6075b4cc7dd1e75269465521	ASV4207	Bacteria	Bdellovibrionota	Bdellovibrionia	Bdellovibrionales	Bdellovibrionaceae	OM27_clade	uncultured_delta	0	40	44	41	23	24	35	0	26	12	32	18	32	13	26	36	16	47	17	33	47	21	13	20	0	61	8	65	28	10	28	23	0	17	0	15	0	22	60	4	8
192ebf28d67df1f4e50b41551783e29f	ASV2141	Bacteria	Bdellovibrionota	Bdellovibrionia	Bdellovibrionales	Bdellovibrionaceae	OM27_clade	uncultured_bacterium	32	22	21	0	17	0	19	17	21	0	31	0	0	20	25	32	22	72	20	50	18	31	26	21	19	0	15	0	0	0	38	0	13	26	0	0	36	16	0	0	17
ce9eda39e55977cc95f18d95e99c587c	ASV4358	Bacteria	Bdellovibrionota	Bdellovibrionia	Bdellovibrionales	Bdellovibrionaceae	OM27_clade	uncultured_bacterium	0	20	29	27	38	33	0	0	0	0	0	48	0	37	0	0	24	14	54	49	0	44	0	19	12	0	0	0	0	0	0	0	0	0	0	0	0	24	0	0	0
4eec6e394a34c06d1d1f480e328d8c41	ASV650	Bacteria	Bdellovibrionota	Bdellovibrionia	Bdellovibrionales	Bdellovibrionaceae	OM27_clade	NA	0	0	29	18	10	13	0	0	0	0	0	15	0	0	0	20	19	24	0	6	54	14	34	0	11	0	0	0	0	0	28	0	0	0	0	0	18	9	0	14	0
8603ceac4027ea1ae81b03d376c53604	ASV2807	Bacteria	Bdellovibrionota	Bdellovibrionia	Bdellovibrionales	Bdellovibrionaceae	OM27_clade	uncultured_bacterium	0	0	0	34	14	0	37	0	0	0	0	0	0	0	0	0	0	22	18	30	5	36	0	0	0	0	0	0	0	0	21	0	0	0	0	0	0	15	0	0	0
1df6a6fa70519c2c3c0a586738992627	ASV224	Bacteria	Bdellovibrionota	Bdellovibrionia	Bdellovibrionales	Bdellovibrionaceae	OM27_clade	uncultured_bacterium	0	0	30	24	0	0	0	0	0	0	0	26	0	0	0	0	0	0	10	0	0	0	21	0	0	0	0	0	0	0	10	0	0	0	0	0	0	0	0	0	0
41ac345a350a866da874693ce2ce43f2	ASV1591	Bacteria	Bdellovibrionota	Bdellovibrionia	Bdellovibrionales	Bdellovibrionaceae	OM27_clade	uncultured_bacterium	0	0	0	0	0	0	6	25	19	5	5	0	0	0	0	0	0	0	0	0	0	0	0	0	0	14	19	9	0	0	0	17	0	0	0	0	0	0	12	0	0
c433df0887722e5105e54c481efeebbb	ASV4185	Bacteria	Bdellovibrionota	Bdellovibrionia	Bdellovibrionales	Bdellovibrionaceae	OM27_clade	uncultured_bacterium	20	10	19	0	0	16	0	0	0	0	0	0	19	0	0	0	0	7	0	0	14	0	0	0	0	0	0	0	0	0	0	0	0	0	0	0	0	0	0	0	0
01f366c9a1556bd1d911f8d00f55076f	ASV265	Bacteria	Bdellovibrionota	Bdellovibrionia	Bdellovibrionales	Bdellovibrionaceae	OM27_clade	uncultured_bacterium	0	0	0	0	0	0	0	9	10	0	0	0	0	0	0	0	0	0	0	0	0	0	0	0	0	0	14	7	22	0	0	4	0	0	0	0	13	6	11	4	0
f85a39af95a29f6b7e283bd653b17b79	ASV5194	Bacteria	Bdellovibrionota	Bdellovibrionia	Bdellovibrionales	Bdellovibrionaceae	OM27_clade	uncultured_bacterium	0	0	0	0	0	0	0	0	0	0	0	0	0	0	0	0	0	0	0	0	0	0	0	18	0	0	0	65	0	15	0	0	0	0	0	0	0	0	0	0	0
81dedd51259de3024c151acb32997dfc	ASV1919	Bacteria	Bdellovibrionota	Bdellovibrionia	Bdellovibrionales	Bdellovibrionaceae	OM27_clade	uncultured_bacterium	0	0	0	0	0	0	0	0	0	0	0	0	10	0	0	0	0	0	0	0	0	0	0	0	0	0	0	0	0	0	0	0	0	0	66	0	19	0	0	0	0
7a95d84fa80a5a402a6b4ba1aa596a39	ASV939	Bacteria	Bdellovibrionota	Bdellovibrionia	Bdellovibrionales	Bdellovibrionaceae	OM27_clade	uncultured_bacterium	0	0	0	0	0	0	0	0	0	0	0	12	0	0	0	0	0	13	0	0	0	0	0	10	5	0	0	0	0	0	38	0	0	0	0	0	0	0	0	0	0
ee894331a23fa9ae5b4a7ee0d79a72ec	ASV5041	Bacteria	Bdellovibrionota	Bdellovibrionia	Bdellovibrionales	Bdellovibrionaceae	OM27_clade	NA	0	0	0	14	0	0	0	0	0	0	0	0	0	0	0	0	10	0	0	0	0	0	0	0	0	0	0	13	0	0	15	0	0	0	0	0	11	12	0	0	7
896e35a0749c2b6eb72555d711162f8e	ASV2512	Bacteria	Bdellovibrionota	Bdellovibrionia	Bdellovibrionales	Bdellovibrionaceae	OM27_clade	uncultured_bacterium	0	0	0	0	0	0	0	11	0	0	0	0	0	0	0	0	0	0	0	0	0	0	53	0	0	15	0	0	0	0	0	0	0	0	0	0	0	0	0	0	0
297e5ba4cf134fa7a8f15385c363cdd7	ASV2200	Bacteria	Bdellovibrionota	Bdellovibrionia	Bdellovibrionales	Bdellovibrionaceae	OM27_clade	uncultured_bacterium	0	14	0	22	0	0	0	0	0	0	0	0	0	0	0	0	0	40	0	0	0	0	0	0	0	0	0	0	0	0	0	0	0	0	0	0	0	0	0	0	0
a3db67becf2a0ee1e7ea2eb392ccd62a	ASV3411	Bacteria	Bdellovibrionota	Bdellovibrionia	Bdellovibrionales	Bdellovibrionaceae	OM27_clade	uncultured_bacterium	0	0	0	0	0	0	0	0	0	0	0	0	0	0	0	0	0	27	0	0	20	0	0	0	14	0	6	0	0	0	0	0	0	0	0	0	0	0	0	0	0
bbea9d283995c5f956454320c6c4b921	ASV3937	Bacteria	Bdellovibrionota	Bdellovibrionia	Bdellovibrionales	Bdellovibrionaceae	OM27_clade	uncultured_organism	0	0	0	0	0	0	12	0	0	0	0	0	0	0	0	0	0	0	0	0	0	17	17	0	0	8	0	13	0	0	8	0	0	0	0	0	0	0	0	0	0
27252d25cb5340a7eb2f47fdc9125661	ASV2906	Bacteria	Bdellovibrionota	Bdellovibrionia	Bdellovibrionales	Bdellovibrionaceae	OM27_clade	NA	0	0	33	0	0	10	9	0	0	0	0	0	0	0	0	6	0	0	0	0	0	0	0	0	0	0	0	0	0	0	8	0	0	0	0	0	0	0	0	0	0
624034f00086a53f8f632977fefa2269	ASV3146	Bacteria	Bdellovibrionota	Bdellovibrionia	Bdellovibrionales	Bdellovibrionaceae	OM27_clade	NA	0	0	0	0	0	0	0	0	0	0	0	0	0	0	0	0	0	11	0	0	0	0	6	24	0	0	0	0	0	0	0	0	0	0	0	0	16	0	0	6	0
e83928a6664fe8b7efe72437acc35ec0	ASV4925	Bacteria	Bdellovibrionota	Bdellovibrionia	Bdellovibrionales	Bdellovibrionaceae	OM27_clade	uncultured_organism	0	0	0	0	0	0	22	0	0	0	0	0	0	0	0	0	0	0	0	0	0	0	0	0	0	28	0	0	0	0	0	0	0	0	0	0	0	0	0	0	0
62a87ff12936794792513eb5ce5bc499	ASV1747	Bacteria	Bdellovibrionota	Bdellovibrionia	Bdellovibrionales	Bdellovibrionaceae	OM27_clade	uncultured_bacterium	0	0	7	0	0	0	0	0	0	0	0	0	0	0	0	0	0	24	0	0	0	0	0	0	0	0	0	0	0	0	15	0	0	0	0	0	0	3	0	0	0
39d154ada5ae9e14f5c933a2995afdc4	ASV1581	Bacteria	Bdellovibrionota	Bdellovibrionia	Bdellovibrionales	Bdellovibrionaceae	OM27_clade	uncultured_bacterium	0	0	0	0	0	0	9	9	0	0	0	6	9	0	7	0	0	0	0	0	0	0	0	0	0	0	0	8	0	0	0	0	0	0	0	0	0	0	0	0	0
c39b314d8d2d3799fc4f1d653a826a4f	ASV4133	Bacteria	Bdellovibrionota	Bdellovibrionia	Bdellovibrionales	Bdellovibrionaceae	OM27_clade	uncultured_bacterium	0	0	0	0	0	0	0	0	0	0	0	0	0	0	0	0	0	0	0	0	0	0	0	0	0	0	0	0	16	7	0	16	0	0	0	0	9	0	0	0	0
454c5f1d325ce8d17c4f1aa0ab4b48f4	ASV2282	Bacteria	Bdellovibrionota	Bdellovibrionia	Bdellovibrionales	Bdellovibrionaceae	OM27_clade	uncultured_organism	0	0	15	0	0	0	0	0	0	0	0	0	0	0	0	0	0	0	0	0	0	0	0	0	0	0	0	0	0	0	0	0	0	0	0	0	0	0	28	0	0
fd72627463ff91879138559c734422b1	ASV5346	Bacteria	Bdellovibrionota	Bdellovibrionia	Bdellovibrionales	Bdellovibrionaceae	OM27_clade	uncultured_bacterium	0	0	19	0	0	0	0	0	0	0	0	0	0	0	0	15	0	0	0	0	0	0	0	0	0	8	0	0	0	0	0	0	0	0	0	0	0	0	0	0	0
6eded54d7b4547d198aa405e777cc5ca	ASV905	Bacteria	Bdellovibrionota	Bdellovibrionia	Bdellovibrionales	Bdellovibrionaceae	OM27_clade	uncultured_bacterium	0	0	8	0	0	0	0	0	0	0	0	0	0	0	0	8	0	0	0	0	0	0	0	5	0	0	0	0	0	0	0	0	0	10	0	6	0	0	0	0	0
db6bccde54e62d6deeea51e0b6da7ce5	ASV4606	Bacteria	Bdellovibrionota	Bdellovibrionia	Bdellovibrionales	Bdellovibrionaceae	OM27_clade	uncultured_organism	0	0	0	0	0	0	0	0	0	0	16	0	0	0	0	0	0	0	0	0	0	0	0	0	0	0	0	21	0	0	0	0	0	0	0	0	0	0	0	0	0
27564918e9c80f9ba25851e11f8e0a06	ASV3287	Bacteria	Bdellovibrionota	Bdellovibrionia	Bdellovibrionales	Bdellovibrionaceae	OM27_clade	uncultured_bacterium	0	0	0	0	0	0	0	0	0	0	0	0	0	0	0	0	0	0	0	0	0	0	0	0	0	0	0	0	0	0	0	0	0	0	0	0	0	0	0	0	0
0ecaf70d1a10769998a997fdaa3683e1	ASV105	Bacteria	Bdellovibrionota	Bdellovibrionia	Bdellovibrionales	Bdellovibrionaceae	OM27_clade	uncultured_bacterium	0	0	0	0	0	0	0	0	0	0	9	0	0	0	0	0	0	0	0	0	0	0	0	0	0	0	0	0	0	0	0	0	0	0	0	20	0	0	0	0	6
7b668d2371df07fdcd41f3c2ea464408	ASV970	Bacteria	Bdellovibrionota	Bdellovibrionia	Bdellovibrionales	Bdellovibrionaceae	OM27_clade	uncultured_bacterium	0	0	0	0	0	0	0	0	0	0	0	0	0	0	0	0	0	0	0	0	0	0	0	0	0	0	0	24	0	10	0	0	0	0	0	0	0	0	0	0	0
b5ba13027a1cff900b4f6f504e987d14	ASV3732	Bacteria	Bdellovibrionota	Bdellovibrionia	Bdellovibrionales	Bdellovibrionaceae	OM27_clade	NA	0	0	0	0	0	0	0	0	0	0	0	9	0	0	0	0	0	9	0	0	0	0	0	0	0	0	0	0	0	0	16	0	0	0	0	0	0	0	0	0	0
6268a4491aa129a9d807a27cf30613fd	ASV2731	Bacteria	Bdellovibrionota	Bdellovibrionia	Bdellovibrionales	Bdellovibrionaceae	OM27_clade	NA	17	0	0	0	0	0	0	0	0	0	0	0	0	0	0	0	0	0	5	0	3	0	0	0	0	0	0	0	0	0	0	0	0	0	0	0	0	0	0	0	0
b20ea9b5b339746183cbed9d3e0a61a1	ASV3779	Bacteria	Bdellovibrionota	Bdellovibrionia	Bdellovibrionales	Bdellovibrionaceae	OM27_clade	NA	12	0	0	9	0	0	0	0	0	0	0	0	0	0	0	0	0	11	0	0	0	0	0	0	0	0	0	0	0	0	0	0	0	0	0	0	0	0	0	0	0
4641705e770ed0f8f0135b316707c5bc	ASV3236	Bacteria	Bdellovibrionota	Bdellovibrionia	Bdellovibrionales	Bdellovibrionaceae	OM27_clade	NA	0	0	0	0	0	0	0	0	0	0	0	0	0	0	0	0	0	0	0	0	0	0	0	0	0	0	0	0	30	0	0	0	0	0	0	0	0	0	0	0	0
4461a4ffb0bad6d067083766090e01c1	ASV2670	Bacteria	Bdellovibrionota	Bdellovibrionia	Bdellovibrionales	Bdellovibrionaceae	OM27_clade	uncultured_bacterium	0	0	0	0	0	0	0	10	0	0	0	0	0	0	0	0	0	0	0	0	0	0	0	0	0	0	0	0	0	0	0	0	0	19	0	0	0	0	0	0	0
79600f16c55c90b01bcd805edd3915bb	ASV3013	Bacteria	Bdellovibrionota	Bdellovibrionia	Bdellovibrionales	Bdellovibrionaceae	OM27_clade	NA	0	0	8	0	0	0	0	0	0	0	0	0	0	0	0	0	0	0	0	0	0	0	0	21	0	0	0	0	0	0	0	0	0	0	0	0	0	0	0	0	0
9335ae34b5e823461f632299bb44fed6	ASV2839	Bacteria	Bdellovibrionota	Bdellovibrionia	Bdellovibrionales	Bdellovibrionaceae	OM27_clade	uncultured_bacterium	7	0	0	0	0	0	0	0	0	0	0	0	0	0	0	0	0	14	0	0	8	0	0	0	0	0	0	0	0	0	0	0	0	0	0	0	0	0	0	0	0
a8fc9a13eeb20b4051c87331252a43ca	ASV3458	Bacteria	Bdellovibrionota	Bdellovibrionia	Bdellovibrionales	Bdellovibrionaceae	OM27_clade	uncultured_bacterium	0	0	0	0	0	0	0	0	0	0	0	7	0	11	0	0	0	0	0	0	0	4	7	0	0	0	0	0	0	0	0	0	0	0	0	0	0	0	0	0	0
f253a0649ce574f3aef25f002cab5b62	ASV5211	Bacteria	Bdellovibrionota	Bdellovibrionia	Bdellovibrionales	Bdellovibrionaceae	OM27_clade	uncultured_bacterium	0	0	0	0	0	12	0	0	0	0	0	0	0	0	0	0	0	0	0	0	0	0	0	0	0	0	0	0	0	0	17	0	0	0	0	0	0	0	0	0	0
576af9e5c1f4423fd402731db7446bd4	ASV2347	Bacteria	Bdellovibrionota	Bdellovibrionia	Bdellovibrionales	Bdellovibrionaceae	OM27_clade	NA	0	0	0	0	0	0	27	0	0	0	0	0	0	0	0	0	0	0	0	0	0	0	0	0	0	0	0	0	0	0	0	0	0	0	0	0	0	0	0	0	0
7c50ec1d33334a2f05707e83a2fdff7b	ASV991	Bacteria	Bdellovibrionota	Bdellovibrionia	Bdellovibrionales	Bdellovibrionaceae	OM27_clade	uncultured_bacterium	0	0	0	0	0	0	0	0	0	0	0	0	0	0	0	0	0	0	0	0	0	0	0	26	0	0	0	0	0	0	0	0	0	0	0	0	0	0	0	0	0
a24081307e1bce83081430610f77d5a1	ASV3571	Bacteria	Bdellovibrionota	Bdellovibrionia	Bdellovibrionales	Bdellovibrionaceae	OM27_clade	uncultured_bacterium	0	0	0	0	0	0	0	0	0	0	0	0	0	0	0	0	5	0	0	8	0	0	0	0	9	0	0	0	0	0	0	0	0	0	0	0	0	0	0	0	4
05de7b4b1cff16649e49aa697bd019b3	ASV759	Bacteria	Bdellovibrionota	Bdellovibrionia	Bdellovibrionales	Bdellovibrionaceae	OM27_clade	uncultured_bacterium	0	0	0	0	0	0	0	0	0	0	0	0	0	0	0	0	0	0	0	0	0	0	0	0	0	0	0	0	0	0	0	0	0	0	0	25	0	0	0	0	0
3283ca6ae4fef8d0944575a2516dad45	ASV2637	Bacteria	Bdellovibrionota	Bdellovibrionia	Bdellovibrionales	Bdellovibrionaceae	OM27_clade	uncultured_delta	9	0	0	0	0	0	0	0	0	0	0	8	0	0	0	0	0	0	0	0	0	0	0	0	0	0	0	0	0	0	8	0	0	0	0	0	0	0	0	0	0
2838d4039a49298693c7ac98d3bf4f4c	ASV2623	Bacteria	Bdellovibrionota	Bdellovibrionia	Bdellovibrionales	Bdellovibrionaceae	OM27_clade	uncultured_bacterium	0	0	0	0	0	0	0	0	0	0	20	0	0	4	0	0	0	0	0	0	0	0	0	0	0	0	0	0	0	0	0	0	0	0	0	0	0	0	0	0	0
61eefe4e76796adfb6c6d16e08a6b11c	ASV1745	Bacteria	Bdellovibrionota	Bdellovibrionia	Bdellovibrionales	Bdellovibrionaceae	OM27_clade	uncultured_bacterium	0	0	0	0	0	0	0	0	0	0	0	0	0	0	0	0	0	0	0	0	0	0	0	0	0	8	0	0	0	4	0	12	0	0	0	0	0	0	0	0	0
cff3e533a1d00653f912ee7ca3696d15	ASV4394	Bacteria	Bdellovibrionota	Bdellovibrionia	Bdellovibrionales	Bdellovibrionaceae	OM27_clade	uncultured_bacterium	0	0	0	0	0	0	0	0	0	0	0	0	0	0	0	0	0	0	0	0	0	0	0	13	0	0	0	0	0	0	0	0	0	0	0	11	0	0	0	0	0
09e712735d1ddad94d423d49a3c09bd9	ASV1320	Bacteria	Bdellovibrionota	Bdellovibrionia	Bdellovibrionales	Bdellovibrionaceae	OM27_clade	uncultured_bacterium	0	0	0	0	0	0	0	0	0	0	0	0	0	0	0	0	0	0	0	0	0	10	0	0	0	0	0	0	0	0	0	0	0	0	7	6	0	0	0	0	0
ae13a6a55cb92b448c67dd672142db27	ASV3660	Bacteria	Bdellovibrionota	Bdellovibrionia	Bdellovibrionales	Bdellovibrionaceae	OM27_clade	NA	5	0	0	0	0	0	0	0	0	0	0	0	0	0	0	0	0	0	0	0	0	0	0	0	0	0	0	0	6	0	0	0	0	0	12	0	0	0	0	0	0
d7f5d9eeb30104994e1a0548c8430967	ASV4461	Bacteria	Bdellovibrionota	Bdellovibrionia	Bdellovibrionales	Bdellovibrionaceae	OM27_clade	uncultured_bacterium	0	0	0	0	0	11	0	0	0	0	0	0	12	0	0	0	0	0	0	0	0	0	0	0	0	0	0	0	0	0	0	0	0	0	0	0	0	0	0	0	0
ab4347dad89f4e93cf13a9eae0dad37c	ASV3602	Bacteria	Bdellovibrionota	Bdellovibrionia	Bdellovibrionales	Bdellovibrionaceae	OM27_clade	NA	0	0	0	0	14	7	0	0	0	0	0	0	0	0	0	0	0	0	0	0	0	0	0	0	0	0	0	0	0	0	0	0	0	0	0	0	0	0	0	0	0
36c5c8ac0cadc5092708670a8def7255	ASV1561	Bacteria	Bdellovibrionota	Bdellovibrionia	Bdellovibrionales	Bdellovibrionaceae	OM27_clade	uncultured_bacterium	0	0	0	0	0	0	0	0	0	0	0	0	0	0	0	0	0	0	0	0	0	0	0	0	0	0	0	0	0	0	0	0	0	0	0	0	20	0	0	0	0
7f93f84c7bc1bfe97d99d6de27999c91	ASV1047	Bacteria	Proteobacteria	Gammaproteobacteria	Beggiatoales	Beggiatoaceae	NA	NA	0	0	0	0	0	0	0	0	0	0	0	0	0	0	0	0	0	0	0	0	0	0	0	0	0	0	0	0	0	0	0	0	0	0	97	19	0	0	0	0	0
e1fad83cb44c6a692e73d9e465590104	ASV4742	Bacteria	Proteobacteria	Gammaproteobacteria	Beggiatoales	Beggiatoaceae	NA	NA	0	0	0	0	0	0	0	0	0	0	0	0	0	0	0	0	0	0	0	0	0	0	0	0	0	0	0	0	0	0	0	0	0	0	0	0	9	0	0	56	0
1141a28b5f3517bb317ad3b6fa23637f	ASV2564	Bacteria	Proteobacteria	Gammaproteobacteria	Beggiatoales	Beggiatoaceae	NA	NA	0	0	0	0	0	0	0	0	0	0	0	0	0	0	0	22	0	0	0	0	0	0	0	0	0	0	0	0	0	0	0	0	0	0	0	0	0	0	0	0	0
32aa6babd3943776fad7f946821df2ad	ASV1532	Bacteria	Proteobacteria	Gammaproteobacteria	Beggiatoales	Beggiatoaceae	Thioflexothrix	Beggiatoa_sp.	0	0	0	0	0	0	0	0	0	0	0	68	0	0	0	0	0	0	0	0	0	0	0	0	0	0	0	0	0	0	0	0	0	0	14	0	0	0	0	0	0
0bca860e101a16dbc036dc76077881c0	ASV42	Bacteria	Acidobacteriota	Blastocatellia	Blastocatellales	Blastocatellaceae	Blastocatella	uncultured_marine	256	122	93	206	63	130	19	34	17	0	0	94	113	95	127	358	221	241	43	336	311	178	65	222	223	0	0	0	0	17	129	0	19	13	64	215	258	66	25	179	116
c97cedba8f54709a145e7fe6813a2c51	ASV4167	Bacteria	Acidobacteriota	Blastocatellia	Blastocatellales	Blastocatellaceae	Blastocatella	uncultured_bacterium	0	0	0	0	0	0	0	0	0	14	0	0	0	0	0	0	0	0	0	0	0	0	0	0	0	0	0	22	9	0	0	0	0	0	0	0	0	0	0	12	0
949927e77f3a5d45e51a80b66a0a7fb2	ASV3190	Bacteria	Acidobacteriota	Blastocatellia	Blastocatellales	Blastocatellaceae	Blastocatella	NA	0	0	0	0	0	0	0	0	0	0	0	0	0	0	0	0	0	0	0	0	0	0	0	0	0	0	0	0	0	0	0	27	0	0	0	0	0	0	0	0	0
77f0c3041d4ea1da4c18c18f17423bef	ASV1890	Bacteria	Myxococcota	Polyangia	Blfdi19	Blfdi19	Blfdi19	NA	46	30	33	25	31	34	29	79	71	18	27	44	30	55	12	16	27	23	52	27	30	36	64	38	7	47	18	39	21	17	96	39	26	0	15	40	17	37	84	5	15
1e0e18c7cc87950bcef7b58ce1096555	ASV225	Bacteria	Myxococcota	Polyangia	Blfdi19	Blfdi19	Blfdi19	NA	0	0	0	0	0	0	0	0	0	0	19	0	0	0	0	0	0	15	0	0	0	0	0	35	0	0	0	17	21	32	0	0	0	9	0	0	0	21	0	0	0
8303929470f22815be9d957d0b43ae5e	ASV3356	Bacteria	Myxococcota	Polyangia	Blfdi19	Blfdi19	Blfdi19	uncultured_bacterium	9	0	0	12	0	0	0	0	0	0	0	0	0	0	0	0	0	19	0	0	0	0	0	0	0	0	0	0	0	0	15	0	0	0	0	0	0	0	0	0	0
c0ce19d7839a7ace402d779059dbd678	ASV4029	Bacteria	Myxococcota	Polyangia	Blfdi19	Blfdi19	Blfdi19	uncultured_bacterium	0	0	0	0	12	0	0	0	0	0	0	0	0	5	0	0	0	0	13	0	0	3	0	0	0	0	0	0	6	0	0	0	0	0	4	0	0	0	0	0	0
28043ed1c8f3896120deb20474593dae	ASV2908	Bacteria	Myxococcota	Polyangia	Blfdi19	Blfdi19	Blfdi19	uncultured_bacterium	0	0	0	0	0	0	0	0	0	0	0	0	0	0	0	0	0	0	0	0	0	0	0	0	0	21	0	0	0	16	0	0	0	0	0	0	0	0	0	0	0
539b80e3c67fa3f48f18ac38893f1dae	ASV2326	Bacteria	Myxococcota	Polyangia	Blfdi19	Blfdi19	Blfdi19	uncultured_bacterium	0	0	0	0	0	0	0	0	0	0	0	0	0	0	0	0	0	0	0	0	0	0	0	0	0	0	0	0	26	0	0	0	0	0	0	0	0	0	0	0	0
878d4e5414b31c6954e795b0fd3f9341	ASV2502	Bacteria	Desulfobacterota	Desulfuromonadia	Bradymonadales	Bradymonadales	Bradymonadales	NA	27	14	22	18	0	0	20	0	9	10	15	4	0	11	8	19	15	35	10	18	10	0	5	0	14	0	9	0	0	0	0	0	0	30	0	12	25	17	24	8	0
f19b6d5db8e5331e56155d1f357d15c5	ASV5166	Bacteria	Desulfobacterota	Desulfuromonadia	Bradymonadales	Bradymonadales	Bradymonadales	NA	14	0	0	0	0	0	0	19	17	10	4	0	9	0	0	10	0	0	0	0	10	9	0	0	17	10	0	0	0	0	0	22	13	0	0	0	26	15	14	0	0
68a688f663db973aa0f6372ab4908d7c	ASV1804	Bacteria	Desulfobacterota	Desulfuromonadia	Bradymonadales	Bradymonadales	Bradymonadales	uncultured_bacterium	0	0	7	0	0	0	12	12	10	0	8	0	3	0	0	0	0	0	0	0	0	0	0	0	0	54	0	22	26	7	0	15	0	9	0	0	0	0	0	0	0
b83f496bdcde3fc4c751cc4e88a34eec	ASV3814	Bacteria	Desulfobacterota	Desulfuromonadia	Bradymonadales	Bradymonadales	Bradymonadales	uncultured_bacterium	0	0	0	0	7	0	13	14	0	0	7	5	0	12	0	0	0	0	0	0	0	0	3	0	0	9	0	19	0	9	5	0	0	13	9	0	0	0	0	0	0
ef74e81f2401d5000345c9194e64eb27	ASV5058	Bacteria	Desulfobacterota	Desulfuromonadia	Bradymonadales	Bradymonadales	Bradymonadales	NA	0	0	0	13	0	0	0	0	4	0	0	6	0	4	6	0	0	0	0	0	3	0	0	8	0	0	0	43	10	0	0	0	0	0	0	0	0	0	0	0	0
5ad42dabf52e22791a3403c838c02972	ASV689	Bacteria	Desulfobacterota	Desulfuromonadia	Bradymonadales	Bradymonadales	Bradymonadales	uncultured_marine	0	0	0	0	0	0	0	0	0	0	0	0	0	0	0	0	0	0	10	0	0	0	0	0	0	17	0	9	0	0	0	0	0	21	0	0	0	9	12	10	5
33d8d650682f7e6530671ef2a7029899	ASV1541	Bacteria	Desulfobacterota	Desulfuromonadia	Bradymonadales	Bradymonadales	Bradymonadales	uncultured_marine	0	0	0	0	0	0	0	0	0	0	0	0	0	0	0	0	0	0	0	0	0	0	0	0	0	0	0	0	0	0	0	0	0	0	92	0	0	0	0	0	0
8007c0acd6f46bf7383150cb192ce9bb	ASV2790	Bacteria	Desulfobacterota	Desulfuromonadia	Bradymonadales	Bradymonadales	Bradymonadales	uncultured_bacterium	0	0	0	0	0	7	0	0	0	0	0	7	0	0	0	2	2	0	0	0	0	0	0	6	0	0	0	0	3	0	18	0	0	0	9	18	0	0	0	4	0
c8c280d8d406008454cf797905899e00	ASV4094	Bacteria	Desulfobacterota	Desulfuromonadia	Bradymonadales	Bradymonadales	Bradymonadales	uncultured_delta	0	0	4	0	0	6	0	0	7	0	0	0	0	11	0	0	0	0	0	0	0	0	0	0	0	11	0	0	0	0	12	0	0	0	8	0	0	0	16	0	0
ff44dfe4b21727e15c7c744a493531b6	ASV5378	Bacteria	Desulfobacterota	Desulfuromonadia	Bradymonadales	Bradymonadales	Bradymonadales	uncultured_marine	0	0	0	0	0	0	0	0	0	0	0	12	0	0	0	0	0	0	0	0	0	0	10	16	0	0	0	0	0	14	0	0	0	0	0	5	0	0	0	0	0
ea1d50205d5b8fe44436dbc2a9ea51a0	ASV4941	Bacteria	Desulfobacterota	Desulfuromonadia	Bradymonadales	Bradymonadales	Bradymonadales	uncultured_delta	0	0	0	11	0	0	0	0	0	10	0	0	0	28	0	0	0	0	10	0	0	0	0	0	0	0	0	0	0	0	0	0	0	13	0	0	0	0	0	0	0
cbef127acca8a19201076cc67dcfdcf6	ASV4304	Bacteria	Desulfobacterota	Desulfuromonadia	Bradymonadales	Bradymonadales	Bradymonadales	uncultured_delta	0	0	0	0	0	0	0	0	0	3	0	0	0	0	0	0	3	0	0	0	0	0	0	6	0	26	0	0	0	0	0	0	6	0	0	0	13	0	5	0	0
bd10602105084eefadc5043b11879aa0	ASV3968	Bacteria	Desulfobacterota	Desulfuromonadia	Bradymonadales	Bradymonadales	Bradymonadales	uncultured_delta	0	0	6	0	0	0	0	0	0	0	0	0	0	0	0	0	0	0	0	0	0	0	6	0	0	0	0	0	0	0	20	0	0	0	0	0	0	0	0	12	9
64d58fdf4bc8e5fc9bd00c07a314a95f	ASV1770	Bacteria	Desulfobacterota	Desulfuromonadia	Bradymonadales	Bradymonadales	Bradymonadales	NA	0	0	0	0	0	0	0	0	15	0	0	0	0	6	0	5	0	6	0	0	0	9	0	0	0	0	0	0	0	0	0	0	0	8	0	0	0	0	0	0	0
0ab35cc66d0d3000531c4917781154be	ASV15	Bacteria	Desulfobacterota	Desulfuromonadia	Bradymonadales	Bradymonadales	Bradymonadales	uncultured_organism	0	0	0	0	0	0	0	0	0	0	0	22	0	0	0	0	0	0	0	0	0	0	0	0	0	0	0	0	0	4	0	0	0	0	0	0	0	0	0	0	0
28d52ebd316a1347d2bbac8f4f00a30a	ASV1496	Bacteria	Desulfobacterota	Desulfuromonadia	Bradymonadales	Bradymonadales	Bradymonadales	uncultured_marine	0	0	3	0	0	0	0	0	0	0	0	0	0	0	0	0	0	4	0	0	0	0	0	0	0	0	0	0	0	0	26	5	0	0	0	6	0	0	0	0	0
6ab37c1d699e657dd5237066045a9563	ASV823	Bacteria	Desulfobacterota	Desulfuromonadia	Bradymonadales	Bradymonadales	Bradymonadales	uncultured_delta	0	0	0	0	0	0	0	0	0	0	0	4	0	0	0	0	0	12	0	0	0	0	10	0	0	0	0	0	0	0	6	0	0	0	0	8	0	0	0	0	3
e6b5389446ded79f8416ae442b46fc29	ASV4787	Bacteria	Desulfobacterota	Desulfuromonadia	Bradymonadales	Bradymonadales	Bradymonadales	uncultured_marine	0	0	0	0	0	0	0	0	0	0	0	0	0	0	10	0	0	0	0	0	0	0	0	0	0	0	0	0	0	0	21	0	0	0	0	0	0	0	0	0	0
9d92b20429df7541643ac77c779684bc	ASV1289	Bacteria	Desulfobacterota	Desulfuromonadia	Bradymonadales	Bradymonadales	Bradymonadales	uncultured_bacterium	0	0	0	0	0	0	0	0	0	0	0	0	0	0	0	0	0	0	0	0	0	0	0	0	0	0	5	21	0	0	0	0	0	4	0	0	0	0	0	0	0
076e4f48cebba7323f912d89e9224a3a	ASV1879	Bacteria	Desulfobacterota	Desulfuromonadia	Bradymonadales	Bradymonadales	Bradymonadales	NA	0	0	0	0	0	0	13	10	0	0	0	0	0	0	0	0	0	0	0	0	0	0	0	0	0	0	0	0	0	0	0	0	0	0	0	0	0	0	6	0	0
84b4e19dafdbec7a85879cf9dcce0062	ASV1945	Bacteria	Desulfobacterota	Desulfuromonadia	Bradymonadales	Bradymonadales	Bradymonadales	uncultured_bacterium	0	0	0	0	0	0	5	7	3	0	0	0	0	0	0	0	0	0	0	0	3	0	0	0	0	0	0	0	0	0	0	0	0	0	0	0	0	0	0	0	0
ff2f5b9879333bb21f1ef53ef4b8b2f2	ASV5374	Bacteria	Desulfobacterota	Desulfuromonadia	Bradymonadales	Bradymonadales	Bradymonadales	uncultured_marine	0	0	0	0	0	0	0	6	0	0	0	0	0	0	0	0	0	0	0	0	0	0	0	0	0	0	15	0	0	0	0	0	0	0	0	0	0	0	0	0	0
212814599db8c694549a9dea33626f58	ASV3319	Bacteria	Desulfobacterota	Desulfuromonadia	Bradymonadales	Bradymonadales	Bradymonadales	uncultured_bacterium	0	0	0	0	0	0	0	0	0	0	0	0	0	0	0	0	0	0	0	0	0	0	0	0	0	2	2	2	0	0	0	0	0	3	0	0	0	0	11	0	0
76aace659bf4708fd822d169ad83d0f4	ASV1872	Bacteria	Spirochaetota	Brevinematia	Brevinematales	Brevinemataceae	Brevinema	NA	0	0	0	0	92	0	15	36	38	0	0	0	0	0	0	0	0	0	0	0	0	0	3	0	0	9	0	20	9	0	0	15	15	0	0	0	0	0	19	0	0
6c990a0114d9cd0fb21a14cf77f40313	ASV855	Bacteria	Proteobacteria	Gammaproteobacteria	Burkholderiales	Comamonadaceae	Delftia	NA	0	0	0	0	0	0	0	0	0	0	0	0	0	0	0	0	0	0	0	0	0	0	0	0	20	0	0	0	0	0	0	0	0	0	0	0	0	0	0	0	0
8cc76089f26b1b18497eaa2ee04c380a	ASV1130	Bacteria	Proteobacteria	Gammaproteobacteria	Burkholderiales	Nitrosomonadaceae	IS-44	NA	0	0	0	0	0	0	0	0	0	0	0	0	0	0	2	0	0	13	0	5	0	5	0	3	0	0	0	4	0	0	0	0	0	0	0	0	0	0	6	0	0
051df825565845cb09b3384d039f440a	ASV1669	Bacteria	Proteobacteria	Gammaproteobacteria	Burkholderiales	Burkholderiaceae	Limnobacter	NA	95	0	0	0	0	0	0	0	0	0	0	0	0	0	0	0	0	0	0	0	0	0	0	60	0	0	0	0	0	0	0	0	0	0	0	0	0	0	0	0	0
65b90d6d9de72b2c36e4616e1a678194	ASV1780	Bacteria	Proteobacteria	Gammaproteobacteria	Burkholderiales	Burkholderiaceae	Limnobacter	uncultured_bacterium	0	0	0	0	0	0	24	11	9	7	0	0	0	0	0	0	0	0	0	0	0	0	0	0	8	0	0	0	0	2	0	0	0	0	0	0	0	0	19	0	0
3c1e8aa407112411003636e8bccecb46	ASV453	Bacteria	Proteobacteria	Gammaproteobacteria	Burkholderiales	Burkholderiaceae	Limnobacter	uncultured_bacterium	0	0	3	0	0	8	0	0	0	0	7	0	0	0	0	0	0	12	0	0	0	0	0	0	0	0	0	13	4	0	12	0	13	0	0	0	0	0	0	0	0
7c8f75594ec0065ee86b73f8a7f1c767	ASV989	Bacteria	Proteobacteria	Gammaproteobacteria	Burkholderiales	NA	NA	NA	0	0	14	0	0	0	0	0	0	0	0	0	0	0	0	0	0	0	0	0	0	0	0	6	0	0	0	0	0	0	3	0	0	0	0	0	0	0	0	0	0
b6ee65a9aecbe5341f29cdd0be201c78	ASV3740	Bacteria	Proteobacteria	Gammaproteobacteria	Burkholderiales	Nitrosomonadaceae	Nitrosomonas	NA	38	31	8	0	19	0	88	161	82	20	69	10	0	0	22	64	53	32	54	23	24	35	40	21	0	95	71	31	28	30	21	71	135	119	30	39	50	20	105	22	26
5a3d41be97d334a38835f49d844041f8	ASV679	Bacteria	Proteobacteria	Gammaproteobacteria	Burkholderiales	Nitrosomonadaceae	Nitrosomonas	NA	0	0	0	0	0	0	0	0	0	0	0	0	0	0	35	38	22	46	0	0	17	9	0	0	20	0	28	0	0	0	0	0	0	22	0	31	65	0	0	24	0
9a173fd8f4f62d237ea7b6a65e261b57	ASV1217	Bacteria	Proteobacteria	Gammaproteobacteria	Burkholderiales	Nitrosomonadaceae	Nitrosomonas	NA	0	0	0	0	0	0	0	0	13	0	0	0	0	0	0	42	0	21	0	47	11	0	0	0	0	0	0	0	0	0	9	0	0	0	0	0	64	0	0	0	0
689247ed69edb08064c43e92936ecc73	ASV3158	Bacteria	Proteobacteria	Gammaproteobacteria	Burkholderiales	Nitrosomonadaceae	Nitrosomonas	NA	30	0	0	0	0	0	0	0	0	0	13	0	0	0	0	0	0	0	0	0	0	0	22	21	0	0	0	0	0	0	0	0	0	0	0	0	59	0	0	0	50
cb0e2120743456b6ab69836bd9a19f8b	ASV4285	Bacteria	Proteobacteria	Gammaproteobacteria	Burkholderiales	Neisseriaceae	uncultured	uncultured_beta	23	11	33	24	53	19	0	0	0	0	0	18	9	18	13	11	16	16	0	15	43	10	6	11	19	0	0	0	0	0	28	0	0	0	43	47	34	31	0	26	17
1794d30e24786b5258ac0e31d51b6109	ASV2587	Bacteria	Planctomycetota	Phycisphaerae	C86	C86	C86	NA	13	16	14	21	13	24	0	22	22	0	0	19	0	0	0	0	0	0	17	26	23	11	0	0	12	10	13	9	0	17	0	17	13	0	11	21	0	0	22	0	10
d70385f7aea5167ad059756e1dcc6220	ASV4554	Bacteria	Planctomycetota	Phycisphaerae	C86	C86	C86	uncultured_bacterium	7	9	0	0	0	0	0	0	0	0	0	0	0	0	0	4	0	6	0	0	7	0	3	5	6	0	0	0	0	0	8	4	0	0	0	0	0	0	0	0	0
1d92517f988319096d9dfc09192743ad	ASV213	Bacteria	Planctomycetota	Phycisphaerae	C86	C86	C86	NA	0	0	15	0	0	0	7	0	0	0	0	0	0	0	0	0	0	0	0	0	0	0	0	10	0	0	14	0	0	0	6	0	0	0	0	0	0	0	0	0	0
a739d0af14e251a0f3f44a1bf1f096e5	ASV3527	Bacteria	Planctomycetota	Phycisphaerae	C86	C86	C86	NA	0	0	0	0	0	0	0	0	0	19	0	0	0	0	0	0	17	0	0	0	0	0	0	0	0	0	0	0	0	0	0	0	0	0	0	0	0	0	0	0	0
f0d36d5ffc4a82e96be925c2f15061a1	ASV5080	Bacteria	Cyanobacteria	Vampirivibrionia	Caenarcaniphilales	Caenarcaniphilales	Caenarcaniphilales	uncultured_bacterium	0	0	0	0	0	0	33	20	0	0	6	12	3	0	0	0	0	0	0	0	0	0	0	0	0	70	0	35	0	93	0	0	0	0	0	0	0	8	24	0	0
f8dcf24b25c996cdf929faf5986da701	ASV5150	Bacteria	Cyanobacteria	Vampirivibrionia	Caenarcaniphilales	Caenarcaniphilales	Caenarcaniphilales	uncultured_bacterium	0	0	0	0	0	0	10	21	11	0	7	0	0	0	0	0	0	0	0	0	0	0	0	0	0	29	14	0	11	20	0	0	33	0	0	0	0	0	17	0	0
082e8a5353deb277ac6e1672f4b2de4c	ASV1930	Bacteria	Cyanobacteria	Vampirivibrionia	Caenarcaniphilales	Caenarcaniphilales	Caenarcaniphilales	uncultured_cyanobacterium	0	0	9	4	0	7	0	0	0	0	0	0	0	0	0	4	0	5	0	15	7	0	0	12	0	0	0	0	0	0	0	0	0	0	0	0	0	4	0	21	0
d7ea49c67f78a58d8abfb5ebb91c0b77	ASV4459	Bacteria	Cyanobacteria	Vampirivibrionia	Caenarcaniphilales	Caenarcaniphilales	Caenarcaniphilales	uncultured_bacterium	0	0	0	0	0	0	0	12	0	0	0	0	0	0	0	0	0	0	0	0	0	0	0	0	0	0	0	0	0	34	0	0	16	0	0	0	0	0	0	3	0
d91358fbcbcf1ae452bd319dcc57da1e	ASV4558	Bacteria	Cyanobacteria	Vampirivibrionia	Caenarcaniphilales	Caenarcaniphilales	Caenarcaniphilales	uncultured_bacterium	0	0	0	0	0	0	0	0	0	0	0	0	0	0	0	0	0	4	0	0	0	0	0	8	0	4	3	0	0	0	0	0	8	0	0	0	0	0	3	0	0
87c4ec31e8d80d8c23644d66f24518e3	ASV1976	Bacteria	Cyanobacteria	Vampirivibrionia	Caenarcaniphilales	Caenarcaniphilales	Caenarcaniphilales	uncultured_bacterium	0	0	0	0	0	3	0	0	0	0	0	0	0	0	0	0	0	0	17	0	0	0	0	0	0	0	0	0	0	0	0	0	0	0	0	0	0	0	0	6	0
4e518a33cdc2781fa4b6ff4a5bd68789	ASV636	Bacteria	Cyanobacteria	Vampirivibrionia	Caenarcaniphilales	Caenarcaniphilales	Caenarcaniphilales	uncultured_bacterium	0	0	0	0	0	0	0	0	5	0	0	0	0	0	0	0	0	0	0	0	0	0	0	0	0	0	0	0	19	0	0	0	0	0	0	0	0	0	0	0	0
f1702e64bb5a91b9ffcb782f72faded4	ASV5234	Bacteria	Cyanobacteria	Vampirivibrionia	Caenarcaniphilales	Caenarcaniphilales	Caenarcaniphilales	uncultured_cyanobacterium	0	0	0	0	0	0	0	0	0	0	0	0	0	0	0	0	0	0	0	4	0	0	5	0	0	0	0	0	0	0	0	0	0	0	0	0	0	7	0	0	0
867e4834a0b34c8251e933105232e3ee	ASV2495	Bacteria	Cyanobacteria	Vampirivibrionia	Caenarcaniphilales	Caenarcaniphilales	Caenarcaniphilales	uncultured_bacterium	0	0	0	0	0	0	0	0	0	2	0	0	0	0	0	0	0	0	0	0	0	0	0	0	0	0	0	0	7	0	0	0	11	0	0	0	0	0	0	0	0
c0bd11c094ac23e0792f68841cc8d62e	ASV4027	Bacteria	Chloroflexi	Anaerolineae	Caldilineales	Caldilineaceae	uncultured	NA	0	22	32	0	9	0	0	0	0	0	0	6	6	8	4	9	4	8	0	22	6	0	12	14	5	0	0	0	0	0	8	0	0	3	10	2	0	0	0	0	10
72a0db3963b662e43e4dee575b2d8645	ASV1838	Bacteria	Calditrichota	Calditrichia	Calditrichales	Calditrichaceae	Calditrichaceae	NA	0	4	0	0	0	0	0	0	0	0	0	0	0	0	0	0	0	0	0	0	0	0	0	0	0	0	5	0	9	0	0	4	4	0	0	0	0	0	0	0	0
006e847d42eca6548b016ff2c3a6f35c	ASV899	Bacteria	Calditrichota	Calditrichia	Calditrichales	Calditrichaceae	Calditrichaceae	uncultured_Deferribacteres	0	0	0	0	0	0	0	0	9	0	0	0	0	0	0	0	0	0	5	0	0	0	0	0	0	0	0	0	0	0	0	0	0	0	0	0	0	0	10	0	0
20ae5d524e1017ee63a1f16314ddfa24	ASV1435	Bacteria	Calditrichota	Calditrichia	Calditrichales	Calditrichaceae	Calorithrix	unidentified_bacterium	16	20	72	26	22	29	0	0	0	0	0	38	29	37	18	0	14	36	0	0	0	28	29	30	14	0	0	0	0	0	49	0	0	0	25	0	0	32	0	12	0
a71ce51d36217f20decf6cc6eec9454a	ASV3493	Bacteria	Calditrichota	Calditrichia	Calditrichales	Calditrichaceae	Calorithrix	unidentified_bacterium	0	0	0	0	0	0	79	51	20	0	25	0	0	0	0	0	0	0	27	20	27	0	0	0	0	10	12	101	17	11	0	15	0	35	0	16	0	0	48	0	0
ad5be2e226e05791e02c2f1c8b86d3c3	ASV3639	Bacteria	Calditrichota	Calditrichia	Calditrichales	Calditrichaceae	Calorithrix	unidentified_bacterium	10	12	10	0	15	30	17	11	10	0	0	0	0	13	0	0	0	0	0	18	23	17	17	18	0	0	0	0	0	0	15	18	0	13	0	0	23	19	13	0	18
94364e438fa1181823128598c8bd0483	ASV3041	Bacteria	Calditrichota	Calditrichia	Calditrichales	Calditrichaceae	Calorithrix	unidentified_bacterium	0	0	0	0	0	0	36	60	23	0	21	0	0	0	0	0	0	0	19	0	0	0	0	0	0	21	30	9	12	0	0	0	14	63	0	0	0	0	36	0	0
70304de3b115ed854256965d105c3fad	ASV3001	Bacteria	Calditrichota	Calditrichia	Calditrichales	Calditrichaceae	Calorithrix	unidentified_bacterium	19	26	30	19	0	15	0	0	0	0	0	11	0	0	0	29	0	20	0	20	28	0	8	0	14	0	0	0	0	0	12	0	0	0	0	0	25	22	0	34	0
9373b5f05b9efae4bcf23bd7d1ee2d54	ASV2840	Bacteria	Calditrichota	Calditrichia	Calditrichales	Calditrichaceae	Calorithrix	NA	14	14	46	0	0	16	0	0	0	0	0	27	0	15	0	0	0	0	0	0	21	0	0	21	0	0	0	12	28	0	28	0	19	36	0	0	0	0	0	0	0
d4fc8213e69ca04b0c28122731756dd9	ASV4438	Bacteria	Calditrichota	Calditrichia	Calditrichales	Calditrichaceae	Calorithrix	unidentified_bacterium	12	16	0	0	16	0	0	0	0	0	0	0	15	0	14	11	16	26	0	16	0	0	18	25	0	0	0	0	0	0	0	0	0	0	0	0	16	38	0	17	17
53d72079c3c150b039c5ba836e95e481	ASV1687	Bacteria	Calditrichota	Calditrichia	Calditrichales	Calditrichaceae	Calorithrix	NA	8	0	13	9	5	0	0	0	0	0	0	0	0	0	0	11	10	0	0	0	0	0	0	0	0	8	0	0	12	0	10	17	0	0	0	0	0	0	10	15	0
cd7e0b10756e4ffcabc22ed6275a8350	ASV4332	Bacteria	Calditrichota	Calditrichia	Calditrichales	Calditrichaceae	Calorithrix	unidentified_bacterium	0	0	0	0	0	0	0	19	0	0	31	0	0	0	0	0	0	0	0	0	0	0	0	0	0	0	0	0	0	0	0	0	0	16	0	0	0	0	0	0	0
72588ea426ee3113874cbf89e445a6a3	ASV3003	Bacteria	Calditrichota	Calditrichia	Calditrichales	Calditrichaceae	Calorithrix	NA	0	0	0	0	0	0	0	0	0	0	0	0	0	0	0	0	0	13	0	10	0	0	0	0	0	0	0	0	0	0	0	0	0	0	0	0	0	0	0	0	0
a6fa2a43914c1bfbad1f5bff69b087e5	ASV3436	Bacteria	Campilobacterota	Campylobacteria	Campylobacterales	Arcobacteraceae	Halarcobacter	NA	0	14	7	0	31	0	0	0	0	84	0	0	0	32	13	0	0	0	0	0	0	0	0	0	0	0	0	0	0	0	0	0	33	0	0	0	10	0	0	0	0
31bc5a52681523705a8edac4cdbf8e9c	ASV1520	Bacteria	Campilobacterota	Campylobacteria	Campylobacterales	Arcobacteraceae	NA	NA	0	0	0	0	101	0	0	0	0	0	0	0	0	0	0	0	0	4	11	0	0	0	0	0	0	0	0	0	0	0	27	0	0	0	117	0	0	0	0	12	0
4f77509412d2461720c31898d482b4a3	ASV668	Bacteria	Campilobacterota	Campylobacteria	Campylobacterales	Arcobacteraceae	NA	NA	0	0	0	0	0	0	0	16	0	0	0	0	0	0	0	0	0	0	0	0	0	0	0	0	0	0	0	0	0	0	0	0	0	0	56	22	0	0	0	47	0
e5fca556ae352094bb773105fbcf6231	ASV4781	Bacteria	Campilobacterota	Campylobacteria	Campylobacterales	Arcobacteraceae	NA	NA	0	0	0	0	0	0	0	0	0	0	0	0	0	0	0	0	0	0	0	0	0	0	0	0	0	0	0	0	15	0	0	0	120	0	0	0	0	0	0	0	0
b933e0c3fe16c1bcb177df2f74de3049	ASV3850	Bacteria	Campilobacterota	Campylobacteria	Campylobacterales	Rs-M59_termite_group	Rs-M59_termite_group	uncultured_bacterium	0	0	0	0	4	127	0	0	0	78	0	0	0	36	29	0	0	0	0	0	0	0	0	0	0	103	0	0	0	18	120	0	175	0	0	0	0	0	0	0	0
50ce3bb152e462aab9e28f25d572e80c	ASV1660	Bacteria	Campilobacterota	Campylobacteria	Campylobacterales	Sulfurimonadaceae	Sulfurimonas	uncultured_bacterium	0	0	0	0	26	0	0	0	0	0	0	0	0	8	0	0	0	0	385	0	0	0	0	4	0	24	0	0	0	0	18	0	0	0	0	0	0	0	0	0	0
1fb4fd06972be0c9d5cec3a34cdf74c4	ASV273	Bacteria	Campilobacterota	Campylobacteria	Campylobacterales	Sulfurimonadaceae	Sulfurimonas	NA	0	0	0	0	113	0	0	8	0	0	8	0	0	26	0	0	0	0	13	0	0	8	12	4	0	0	0	0	0	0	0	0	0	0	0	0	0	0	0	0	0
9a4ed02ab35267b1c5c0c9b57e5dc669	ASV1211	Bacteria	Campilobacterota	Campylobacteria	Campylobacterales	Sulfurimonadaceae	Sulfurimonas	uncultured_prokaryote	0	0	0	0	18	0	0	0	0	0	0	0	0	0	0	0	0	0	58	0	0	0	0	0	0	7	2	0	3	0	0	0	0	0	0	0	0	0	0	0	0
13322b683362a2f8661c96a1cbcda21b	ASV2873	Bacteria	Campilobacterota	Campylobacteria	Campylobacterales	Sulfurimonadaceae	Sulfurimonas	NA	0	0	0	0	0	0	0	0	0	0	0	0	0	0	0	0	0	0	0	0	0	0	0	0	0	41	0	0	2	0	0	0	0	0	0	0	0	0	0	0	0
ba402e80984343e525b60bbeb075a314	ASV3904	Bacteria	Campilobacterota	Campylobacteria	Campylobacterales	Sulfurovaceae	Sulfurovum	NA	0	0	0	0	0	0	0	0	0	28	0	0	0	0	0	0	0	0	0	0	0	0	0	0	0	0	0	0	0	33	0	0	0	0	0	0	0	0	0	0	0
39eb0598a6562ea37a4361f4150376e6	ASV1582	Bacteria	Campilobacterota	Campylobacteria	Campylobacterales	Arcobacteraceae	uncultured	NA	0	0	0	0	0	1007	0	0	0	0	0	0	0	0	0	0	0	0	0	0	0	0	0	0	0	0	0	0	0	0	0	0	0	0	0	0	0	0	0	0	0
852c6b580d5af47c052d697ccdf598ff	ASV2484	Bacteria	Campilobacterota	Campylobacteria	Campylobacterales	Arcobacteraceae	uncultured	NA	0	0	0	6	14	381	0	0	0	0	0	0	57	97	237	0	0	0	0	0	8	0	0	0	0	0	0	0	0	0	0	0	0	0	11	0	0	115	0	0	0
67e250c413d85d810c17118cfad3a971	ASV1802	Bacteria	Campilobacterota	Campylobacteria	Campylobacterales	Arcobacteraceae	uncultured	uncultured_Arcobacter	0	0	0	0	0	0	0	0	0	341	0	0	0	0	47	0	0	0	0	0	0	0	0	0	0	7	0	0	0	0	0	0	64	0	0	0	0	0	0	0	0
8d44a118245f955746b42894c39257f7	ASV1140	Bacteria	Campilobacterota	Campylobacteria	Campylobacterales	Arcobacteraceae	uncultured	uncultured_organism	0	0	0	0	64	0	0	0	0	0	0	0	0	0	0	0	0	0	90	0	0	0	0	0	0	0	0	0	0	0	0	0	0	0	117	0	0	0	0	0	0
3dfe37b65598419f85d42d141152f258	ASV496	Bacteria	Campilobacterota	Campylobacteria	Campylobacterales	Arcobacteraceae	uncultured	uncultured_Arcobacter	0	0	0	0	0	0	0	0	0	147	0	0	0	0	0	0	0	0	0	0	0	0	0	0	4	0	0	0	0	0	0	0	0	0	0	0	0	0	0	0	0
8dd9dca7b7b2467e34f01b24242618ee	ASV1155	Bacteria	Campilobacterota	Campylobacteria	Campylobacterales	Arcobacteraceae	uncultured	NA	0	0	0	0	0	0	17	0	0	0	0	0	0	0	0	0	0	0	0	0	0	0	0	0	0	18	0	12	0	0	0	0	0	0	0	0	0	0	0	0	0
71621c771afab67534fe6c8c3a25a633	ASV3002	Bacteria	Patescibacteria	Parcubacteria	Candidatus_Campbellbacteria	Candidatus_Campbellbacteria	Candidatus_Campbellbacteria	uncultured_bacterium	0	0	0	0	40	0	0	0	0	0	0	0	41	0	0	0	0	0	0	0	0	0	0	0	0	0	0	0	0	0	0	0	0	0	0	0	0	0	0	0	0
eef21f8129293c7feede6a60d2cf7d4b	ASV5050	Bacteria	Patescibacteria	Parcubacteria	Candidatus_Campbellbacteria	Candidatus_Campbellbacteria	Candidatus_Campbellbacteria	uncultured_bacterium	0	0	0	0	0	0	21	13	0	6	8	10	0	0	0	0	0	0	0	0	0	0	0	0	0	0	0	47	0	0	0	0	0	11	0	0	0	0	0	0	0
c7cb64ed9886c562691a29d6b2400819	ASV4089	Bacteria	Patescibacteria	Parcubacteria	Candidatus_Campbellbacteria	Candidatus_Campbellbacteria	Candidatus_Campbellbacteria	uncultured_bacterium	0	0	8	0	7	0	0	0	0	0	0	0	0	0	0	0	0	0	0	0	0	0	5	0	0	0	0	0	0	0	11	0	0	0	8	3	0	0	0	0	0
04fbc4d73de97c5b6a01dc1c7f9d61b7	ASV674	Bacteria	Patescibacteria	Parcubacteria	Candidatus_Campbellbacteria	Candidatus_Campbellbacteria	Candidatus_Campbellbacteria	uncultured_bacterium	0	0	0	0	0	0	0	2	0	0	0	0	0	0	0	0	0	0	0	0	0	0	0	0	0	9	0	0	0	0	0	0	26	0	0	0	0	0	0	0	0
d3e1c4deee4ffd22f0c2186f8cbf856e	ASV4428	Bacteria	Patescibacteria	ABY1	Candidatus_Falkowbacteria	Candidatus_Falkowbacteria	Candidatus_Falkowbacteria	Candidatus_Falkowbacteria	0	0	0	0	157	3	0	0	0	0	0	11	0	22	0	0	0	0	0	0	0	0	11	0	0	0	0	0	0	0	0	0	0	0	0	0	0	0	0	0	0
322013c398ebfd99d91478883d9381c0	ASV3100	Bacteria	Patescibacteria	ABY1	Candidatus_Falkowbacteria	Candidatus_Falkowbacteria	Candidatus_Falkowbacteria	NA	0	0	0	0	0	0	0	0	0	0	0	0	0	0	0	0	0	0	0	0	0	0	0	0	0	7	0	5	0	0	0	3	14	0	0	0	0	0	0	0	0
5bb000ed2a76d5525e39a51df31c713f	ASV706	Bacteria	Patescibacteria	Parcubacteria	Candidatus_Kaiserbacteria	Candidatus_Kaiserbacteria	Candidatus_Kaiserbacteria	uncultured_organism	14	14	30	14	41	17	15	8	11	0	13	30	11	18	21	14	5	14	0	21	0	17	14	0	12	0	0	19	0	0	8	0	0	13	0	58	0	26	0	13	10
c3f7806c41f208aeca9c0eb741622b2a	ASV4053	Bacteria	Patescibacteria	Parcubacteria	Candidatus_Kaiserbacteria	Candidatus_Kaiserbacteria	Candidatus_Kaiserbacteria	NA	0	42	30	0	49	26	0	0	0	0	0	46	33	27	0	0	15	0	0	43	0	35	42	0	0	0	0	0	0	0	34	0	0	0	13	0	0	17	0	0	8
747da2d7cc095efb96418fc41d888027	ASV2438	Bacteria	Patescibacteria	Parcubacteria	Candidatus_Kaiserbacteria	Candidatus_Kaiserbacteria	Candidatus_Kaiserbacteria	uncultured_organism	18	14	0	15	0	30	44	16	11	4	0	17	0	10	0	0	0	0	0	0	24	0	0	8	0	18	0	42	19	39	0	7	14	0	0	10	0	0	16	0	0
24790f1e58e2331a338fd47f9fa9676a	ASV2902	Bacteria	Patescibacteria	Parcubacteria	Candidatus_Kaiserbacteria	Candidatus_Kaiserbacteria	Candidatus_Kaiserbacteria	uncultured_organism	0	0	154	0	10	0	0	0	0	0	0	0	35	0	24	10	0	9	0	11	0	27	0	0	0	0	0	0	0	0	16	0	0	0	0	0	0	11	0	0	0
67830666b21b4526657caad23aee7273	ASV3309	Bacteria	Patescibacteria	Parcubacteria	Candidatus_Kaiserbacteria	Candidatus_Kaiserbacteria	Candidatus_Kaiserbacteria	uncultured_bacterium	0	0	0	0	0	0	49	35	11	12	25	0	0	0	0	0	0	0	10	0	0	0	0	0	0	34	0	26	22	9	0	0	0	16	0	0	0	0	51	0	0
f59181833e954b5232cf36a28f485bc7	ASV5265	Bacteria	Patescibacteria	Parcubacteria	Candidatus_Kaiserbacteria	Candidatus_Kaiserbacteria	Candidatus_Kaiserbacteria	NA	0	0	35	11	0	0	0	0	0	0	0	9	0	0	0	0	0	0	0	16	0	0	0	0	17	0	0	0	0	0	0	0	0	0	0	0	0	18	0	10	0
37b429498503f02b8efb032cd06faad6	ASV1567	Bacteria	Patescibacteria	Parcubacteria	Candidatus_Kaiserbacteria	Candidatus_Kaiserbacteria	Candidatus_Kaiserbacteria	uncultured_bacterium	0	0	0	13	0	0	0	0	0	0	0	0	0	0	0	11	0	0	0	0	0	0	0	0	0	0	0	0	0	0	0	0	0	0	0	39	0	0	0	16	0
a0af4e03b6ce37c029759ca65b24a969	ASV3384	Bacteria	Patescibacteria	Parcubacteria	Candidatus_Kaiserbacteria	Candidatus_Kaiserbacteria	Candidatus_Kaiserbacteria	uncultured_organism	0	0	0	0	0	0	0	13	0	0	0	0	0	0	0	0	0	0	0	0	0	0	0	0	0	11	0	0	0	26	0	7	0	0	0	0	0	0	21	0	0
38e87d84ec5e2631af3596efe213b77d	ASV1574	Bacteria	Patescibacteria	Parcubacteria	Candidatus_Kaiserbacteria	Candidatus_Kaiserbacteria	Candidatus_Kaiserbacteria	uncultured_organism	0	0	0	0	0	0	17	0	0	0	0	0	0	0	0	0	0	0	0	0	0	0	0	0	0	0	0	38	0	0	0	0	0	7	0	0	0	0	13	0	0
8be0cc39f0fa31fe168835dc5d6b1764	ASV1114	Bacteria	Patescibacteria	Parcubacteria	Candidatus_Kaiserbacteria	Candidatus_Kaiserbacteria	Candidatus_Kaiserbacteria	NA	8	6	0	0	8	0	0	0	0	0	0	0	0	17	0	0	0	0	4	0	0	0	4	0	5	0	0	0	0	0	0	0	0	0	0	0	0	7	0	0	0
6799fe891b8e617e4b64613d172b4535	ASV2743	Bacteria	Patescibacteria	Parcubacteria	Candidatus_Kaiserbacteria	Candidatus_Kaiserbacteria	Candidatus_Kaiserbacteria	NA	0	0	0	0	0	0	0	0	0	0	0	0	0	0	0	0	0	8	0	0	0	0	17	0	7	0	0	0	0	0	0	0	0	0	0	0	0	0	0	0	0
06a06965f82e0383815589a24051286a	ASV817	Bacteria	Patescibacteria	Parcubacteria	Candidatus_Kaiserbacteria	Candidatus_Kaiserbacteria	Candidatus_Kaiserbacteria	uncultured_organism	0	0	0	0	0	0	0	0	0	0	0	0	0	0	0	0	0	0	0	6	0	0	0	0	0	0	0	16	0	0	0	0	0	0	5	0	0	0	0	0	0
8f8ee0f61fdb5fc8eb029bc5fbdfe0dc	ASV1190	Bacteria	Patescibacteria	Parcubacteria	Candidatus_Kaiserbacteria	Candidatus_Kaiserbacteria	Candidatus_Kaiserbacteria	NA	0	0	0	0	0	0	0	0	0	0	0	0	0	0	0	0	0	0	0	0	0	0	10	0	0	0	0	9	0	0	0	0	4	0	0	0	0	0	0	0	0
1f605ee12d3b0349361b900ae905e787	ASV267	Bacteria	Patescibacteria	Parcubacteria	Candidatus_Kaiserbacteria	Candidatus_Kaiserbacteria	Candidatus_Kaiserbacteria	uncultured_bacterium	0	2	0	0	0	0	0	0	0	0	0	0	0	0	0	0	0	0	0	14	0	0	0	0	0	0	0	0	0	0	0	0	0	0	0	0	0	0	0	6	0
c138834566cf92795ea34f55e6551da0	ASV4259	Bacteria	Patescibacteria	Parcubacteria	Candidatus_Nomurabacteria	Candidatus_Nomurabacteria	Candidatus_Nomurabacteria	uncultured_bacterium	0	0	27	9	16	6	0	0	0	0	0	0	0	10	0	12	0	5	0	9	0	7	17	0	0	0	0	0	0	0	6	0	0	0	0	0	3	30	0	9	0
0aa4dfa435c75f0c7da6104e857c8dfe	ASV12	Bacteria	Proteobacteria	Alphaproteobacteria	Caulobacterales	Hyphomonadaceae	Algimonas	uncultured_bacterium	28	40	54	24	31	19	63	18	0	0	0	40	18	23	38	30	25	25	26	16	29	31	34	19	16	74	12	73	12	161	27	0	21	39	80	24	0	53	12	0	0
0eaab36e64863ad43d4fdc4995d4daf8	ASV102	Bacteria	Proteobacteria	Alphaproteobacteria	Caulobacterales	Hyphomonadaceae	Hellea	uncultured_Alphaproteobacteria	0	41	0	0	31	0	294	16	41	62	62	55	71	27	72	0	0	94	29	0	29	0	38	0	0	0	0	301	20	0	101	0	0	39	11	0	9	60	31	32	20
1940ad5eb5dee54169959740472b01a1	ASV2592	Bacteria	Proteobacteria	Alphaproteobacteria	Caulobacterales	Hyphomonadaceae	Hyphobacterium	mucus_bacterium	24	31	29	24	32	15	15	31	45	0	13	19	0	13	5	29	25	13	22	15	12	24	38	0	32	37	25	7	14	16	12	20	59	13	48	9	16	13	13	13	18
15d84abbf94dcdc5f99c439f874a6e88	ASV1406	Bacteria	Proteobacteria	Alphaproteobacteria	Caulobacterales	Parvularculaceae	Hyphococcus	NA	208	80	98	107	118	0	0	0	0	0	0	88	0	35	0	80	66	169	52	116	71	84	220	75	156	0	0	0	0	0	85	0	0	0	67	119	165	77	0	62	96
5316adab7ecd19128965f1d82911106f	ASV2698	Bacteria	Proteobacteria	Alphaproteobacteria	Caulobacterales	Parvularculaceae	Hyphococcus	Hyphococcus_flavus	0	18	24	22	0	18	53	160	76	31	64	28	0	18	15	15	0	0	24	0	19	8	17	0	27	93	53	39	39	27	0	59	56	88	0	21	0	21	73	14	14
82e2dd5b88fa46d05ca19f7cbcae24a0	ASV1928	Bacteria	Proteobacteria	Alphaproteobacteria	Caulobacterales	Parvularculaceae	Hyphococcus	NA	26	0	0	0	0	0	0	0	0	0	0	0	0	0	0	0	0	21	0	0	0	0	0	0	0	0	0	0	0	0	0	0	0	0	0	0	0	0	0	0	0
9b4dc66992e676d985d71e05ca209e46	ASV1236	Bacteria	Proteobacteria	Alphaproteobacteria	Caulobacterales	Parvularculaceae	Hyphococcus	Hyphococcus_flavus	0	0	0	0	0	0	0	0	0	0	0	0	0	0	0	0	0	0	0	0	0	7	0	0	0	0	0	0	0	0	11	0	0	0	0	0	25	0	0	0	0
1cb5d9b0de057f678eb61fb48fe4e413	ASV192	Bacteria	Proteobacteria	Alphaproteobacteria	Caulobacterales	Hyphomonadaceae	Maricaulis	NA	47	39	0	0	0	0	0	0	0	0	0	10	0	0	21	0	19	25	0	0	16	18	0	28	62	0	13	0	0	9	0	0	0	0	35	0	0	15	0	20	0
9e1303e910494fdff95b902f9f7b36a8	ASV1317	Bacteria	Proteobacteria	Alphaproteobacteria	Caulobacterales	Hyphomonadaceae	Maricaulis	NA	21	9	9	0	31	0	0	0	0	0	0	0	0	0	0	0	0	23	0	0	0	0	0	12	21	0	0	0	0	0	0	0	0	0	0	19	9	0	0	0	0
4e55aaa0abe76fdfddbc6dff8985f9eb	ASV632	Bacteria	Proteobacteria	Alphaproteobacteria	Caulobacterales	Hyphomonadaceae	Maricaulis	uncultured_bacterium	17	0	8	0	14	5	0	0	11	0	0	0	0	10	0	0	0	19	0	0	0	0	0	0	0	13	9	5	0	0	0	18	4	11	0	0	0	0	0	0	9
5f24052b68300e4c3b9c657f65375c61	ASV796	Bacteria	Proteobacteria	Alphaproteobacteria	Caulobacterales	Hyphomonadaceae	Maricaulis	uncultured_bacterium	0	0	0	0	0	0	0	0	0	0	0	0	0	0	0	16	0	0	0	0	0	0	0	0	0	0	0	0	0	0	0	0	0	0	0	21	0	0	0	0	23
1d5e70ed88b1d1d2fd1e9c4506e42d39	ASV197	Bacteria	Proteobacteria	Alphaproteobacteria	Caulobacterales	Hyphomonadaceae	Maricaulis	alpha_proteobacterium	0	0	0	0	0	0	0	0	0	0	0	0	0	0	0	0	0	0	0	0	0	0	0	0	0	0	0	0	0	0	15	0	0	0	9	0	0	0	0	0	0
4ddcb8a766242940707a5715b5faadbe	ASV623	Bacteria	Proteobacteria	Alphaproteobacteria	Caulobacterales	Hyphomonadaceae	Maricaulis	NA	0	0	0	0	0	0	0	0	0	0	0	0	0	0	0	0	0	0	0	0	0	0	0	0	0	0	0	0	0	0	0	0	0	0	0	0	22	0	0	0	0
1246450940adb93c123443712e509596	ASV3344	Bacteria	Proteobacteria	Alphaproteobacteria	Caulobacterales	Parvularculaceae	Marinicaulis	uncultured_Rhizobiales	260	125	189	137	111	152	74	233	111	0	79	108	168	108	89	94	109	145	104	143	134	125	125	168	179	96	114	81	66	103	185	77	119	177	94	128	158	179	105	129	123
5755d91f13c7a4cd7dd47a4689f10ccd	ASV2715	Bacteria	Proteobacteria	Alphaproteobacteria	Caulobacterales	Parvularculaceae	Marinicaulis	uncultured_Rhizobiales	267	171	158	145	97	187	51	110	0	63	65	135	0	143	123	119	109	218	66	200	128	149	116	239	240	93	0	0	43	0	145	50	61	56	84	175	166	187	79	139	107
f66abcd50aca48895ec43a54a4ef7290	ASV5188	Bacteria	Proteobacteria	Alphaproteobacteria	Caulobacterales	Parvularculaceae	Marinicaulis	uncultured_bacterium	87	49	40	57	70	61	42	48	51	22	34	44	31	44	61	53	56	57	41	92	40	43	70	81	41	81	23	37	13	23	51	36	26	86	78	112	131	93	72	54	59
7e4c3d971675a3301a761911e8edb2d6	ASV1025	Bacteria	Proteobacteria	Alphaproteobacteria	Caulobacterales	Parvularculaceae	Marinicaulis	uncultured_bacterium	10	10	0	0	0	0	0	0	0	0	0	0	6	0	0	0	0	0	0	11	20	6	0	13	7	0	0	0	0	0	0	0	0	0	9	0	0	14	0	0	0
198aa90fe8f959e0af017f2d652487d3	ASV2144	Bacteria	Proteobacteria	Alphaproteobacteria	Caulobacterales	Hyphomonadaceae	NA	NA	523	312	709	439	561	430	422	413	187	180	195	472	377	387	348	259	360	412	363	308	422	403	375	460	423	820	201	910	470	663	499	244	359	308	521	419	363	523	475	371	280
f7a9ec4a76e558abad166f5c0ed97475	ASV5132	Bacteria	Proteobacteria	Alphaproteobacteria	Caulobacterales	Parvularculaceae	NA	NA	158	106	126	124	84	120	78	49	50	41	78	102	94	75	117	132	127	188	47	112	140	116	94	126	76	58	51	40	55	0	94	34	42	75	98	165	184	124	67	89	109
9bd92233f3a3b18f9d80107fa0522299	ASV1251	Bacteria	Proteobacteria	Alphaproteobacteria	Caulobacterales	Hyphomonadaceae	NA	NA	31	11	58	29	19	0	49	0	0	8	0	10	34	19	35	0	16	57	15	16	10	24	11	8	0	10	0	39	0	50	31	9	0	0	5	0	0	16	0	7	0
bd2156d9fdf8da8783fb0c88cb9d0b24	ASV3965	Bacteria	Proteobacteria	Alphaproteobacteria	Caulobacterales	Parvularculaceae	NA	NA	64	28	0	34	15	21	18	15	0	9	20	30	23	0	21	24	17	24	0	29	25	28	26	36	45	0	0	9	0	0	30	0	0	11	0	33	42	28	13	18	0
244439ed0c8afcaf518804096a622759	ASV3086	Bacteria	Proteobacteria	Alphaproteobacteria	Caulobacterales	Parvularculaceae	NA	NA	0	0	0	0	0	0	0	0	0	0	0	0	0	0	0	0	0	0	0	0	0	0	40	0	0	0	0	0	0	0	0	0	0	0	0	0	0	0	0	0	0
abb109f3efd3aeaa0d9cef8871d7225a	ASV3608	Bacteria	Proteobacteria	Alphaproteobacteria	Caulobacterales	Parvularculaceae	NA	NA	0	0	0	0	0	0	0	0	0	0	0	0	0	0	0	0	0	0	0	0	0	0	0	0	0	0	0	0	0	0	0	0	26	0	0	0	0	0	0	0	0
07fab428a3e5a5166eeb36a76d058e60	ASV1053	Bacteria	Proteobacteria	Alphaproteobacteria	Caulobacterales	Hyphomonadaceae	Oceanicaulis	uncultured_Alphaproteobacteria	0	0	24	0	0	0	0	0	0	64	0	0	0	0	0	0	0	0	0	0	0	0	0	0	0	10	0	0	0	26	0	0	5	0	0	0	0	0	0	0	0
16b7d666e2ccb892c7b6a82c1e664c01	ASV1409	Bacteria	Proteobacteria	Alphaproteobacteria	Caulobacterales	Hyphomonadaceae	Oceanicaulis	alpha_proteobacterium	0	0	0	0	0	0	0	7	5	0	3	0	0	0	0	0	0	0	0	0	0	0	0	0	0	13	0	16	5	0	0	15	0	0	0	0	0	0	12	0	0
ccb8e52013e692661b96e54888d8014b	ASV4324	Bacteria	Proteobacteria	Alphaproteobacteria	Caulobacterales	Hyphomonadaceae	Oceanicaulis	NA	0	0	33	0	0	0	0	0	0	0	0	0	0	0	0	0	0	0	0	0	0	0	0	0	0	0	0	0	0	0	0	0	0	0	0	0	0	0	0	0	0
4b967214dc8a33dbbb6345cb77c69e05	ASV568	Bacteria	Proteobacteria	Alphaproteobacteria	Caulobacterales	Parvularculaceae	Parvularcula	Parvularcula_sp.	40	41	39	19	44	41	96	127	144	32	26	29	23	35	23	38	65	38	33	30	13	76	35	36	37	225	27	76	56	30	42	72	146	55	98	68	32	49	85	14	20
d3487a7d46484b67d667df2b38cc941e	ASV4534	Bacteria	Proteobacteria	Alphaproteobacteria	Caulobacterales	Parvularculaceae	Parvularcula	NA	55	37	34	86	51	42	51	41	27	18	52	31	65	31	34	53	58	86	40	93	55	61	39	60	50	47	0	82	38	0	65	20	26	28	64	73	49	78	34	33	25
7e4ef7b43d7be0218f7d7c26089ff4ef	ASV1026	Bacteria	Proteobacteria	Alphaproteobacteria	Caulobacterales	Parvularculaceae	Parvularcula	NA	26	0	9	0	0	0	0	0	0	0	0	0	0	8	16	0	0	29	0	0	0	0	17	0	0	0	0	0	0	0	0	0	0	0	35	36	25	0	0	0	15
c47854fbbfd9abe4b3a4347b8326f0b6	ASV4235	Bacteria	Proteobacteria	Alphaproteobacteria	Caulobacterales	Parvularculaceae	Parvularcula	uncultured_organism	0	0	7	0	0	0	0	0	0	0	0	0	0	0	0	0	0	0	0	0	0	0	0	0	0	0	0	0	9	136	0	0	0	0	0	0	0	0	0	0	0
bdb2c3b49e90fbe9e7e6e82daa15c2b0	ASV3973	Bacteria	Proteobacteria	Alphaproteobacteria	Caulobacterales	Parvularculaceae	Parvularcula	uncultured_Alphaproteobacteria	0	0	0	0	0	0	0	0	0	0	0	0	0	0	0	0	0	0	0	0	0	0	0	0	0	0	0	0	0	0	19	0	0	0	0	0	0	0	0	0	0
506b6a816161325c4ce85371e5f10cef	ASV2309	Bacteria	Proteobacteria	Alphaproteobacteria	Caulobacterales	Parvularculaceae	Parvularcula	NA	0	0	0	0	0	0	0	0	0	0	0	0	0	0	0	0	0	16	0	0	0	0	0	0	0	0	0	0	0	0	0	0	0	0	22	0	0	0	0	0	0
bf0bddef7d93de873ac9fcd8343326b5	ASV4005	Bacteria	Proteobacteria	Alphaproteobacteria	Caulobacterales	Parvularculaceae	uncultured	uncultured_bacterium	89	85	91	54	36	53	0	22	0	0	0	54	43	36	46	76	95	71	24	111	91	53	57	78	122	0	0	0	0	12	61	22	0	21	51	64	88	75	0	56	64
1f428c21950a0d477789322fac5f1ba5	ASV266	Bacteria	Proteobacteria	Alphaproteobacteria	Caulobacterales	Hyphomonadaceae	uncultured	NA	0	0	112	29	49	82	28	31	28	28	35	62	35	52	49	0	0	24	32	0	0	0	37	0	6	0	0	21	50	104	34	24	8	54	0	0	0	104	34	44	18
88a4a4da59043d3952e3a5df90a6eadf	ASV1985	Bacteria	Proteobacteria	Alphaproteobacteria	Caulobacterales	Parvularculaceae	uncultured	uncultured_bacterium	29	48	36	41	0	35	28	45	25	19	31	31	0	23	20	35	25	27	46	42	39	40	17	29	36	44	29	25	16	0	0	35	14	45	23	50	63	44	23	26	44
0735ded81424334b8798a416e1faba02	ASV2432	Bacteria	Proteobacteria	Alphaproteobacteria	Caulobacterales	Hyphomonadaceae	uncultured	uncultured_organism	0	16	57	0	12	15	0	0	0	0	0	23	0	0	37	0	0	7	0	0	0	0	18	0	0	0	0	0	0	0	5	0	0	0	0	0	0	0	0	0	0
17248b376af42b1d3f236d32406c28ee	ASV2884	Bacteria	Proteobacteria	Alphaproteobacteria	Caulobacterales	Hyphomonadaceae	uncultured	NA	0	0	0	0	0	0	0	0	0	0	0	0	0	0	0	0	0	0	0	0	0	0	0	0	0	0	0	0	0	0	0	0	0	63	0	0	0	0	0	0	0
8f9aeea8c9666dd49512f052571070f8	ASV1191	Bacteria	Proteobacteria	Alphaproteobacteria	Caulobacterales	Hyphomonadaceae	uncultured	uncultured_bacterium	0	10	0	0	10	12	0	0	0	0	0	0	0	0	0	17	0	10	0	19	0	7	0	0	13	0	0	0	0	0	0	0	0	0	0	20	21	9	0	9	0
4db7326f2f960a9ca00c3fa3c6c58664	ASV619	Bacteria	Proteobacteria	Alphaproteobacteria	Caulobacterales	Hyphomonadaceae	uncultured	uncultured_bacterium	0	0	0	0	0	0	0	0	0	0	0	0	0	0	0	0	11	0	0	0	0	0	0	100	0	0	0	0	0	0	0	0	0	0	8	0	0	0	0	0	0
9d4d6af361a822123f9029af9d3c7762	ASV1281	Bacteria	Proteobacteria	Alphaproteobacteria	Caulobacterales	Hyphomonadaceae	uncultured	uncultured_bacterium	19	0	0	18	0	0	0	0	0	0	0	16	0	13	0	0	18	0	0	0	0	0	0	0	0	5	0	0	0	0	0	0	0	0	0	0	0	0	0	0	8
f1a9fa4a4720b08b1426f5e7f8f80ed5	ASV5084	Bacteria	Proteobacteria	Alphaproteobacteria	Caulobacterales	Parvularculaceae	uncultured	NA	0	12	0	0	0	0	0	0	0	0	0	0	9	0	0	17	0	17	0	0	0	0	6	9	0	0	0	0	0	0	0	0	0	0	0	0	0	0	0	20	0
95adada5c750d3e0487690e2693f6405	ASV2041	Bacteria	Proteobacteria	Alphaproteobacteria	Caulobacterales	Hyphomonadaceae	uncultured	uncultured_Hyphomonadaceae	0	0	0	0	0	0	0	6	0	0	0	0	0	0	0	0	0	0	0	0	0	0	0	0	0	8	0	0	0	0	0	0	0	6	0	0	0	0	0	0	0
3cf72c904c6e07367ecfd327542127b1	ASV472	Bacteria	Planctomycetota	Phycisphaerae	CCM11a	CCM11a	CCM11a	uncultured_Planctomycetales	96	67	163	70	106	145	69	98	68	44	90	142	94	138	81	96	146	145	112	117	125	173	123	333	53	80	61	0	52	58	203	104	74	149	164	297	75	130	108	98	90
8a08b476bde922d17c55bae2ce3098f5	ASV1072	Bacteria	Planctomycetota	Phycisphaerae	CCM11a	CCM11a	CCM11a	uncultured_bacterium	53	27	71	57	46	37	0	30	14	0	35	43	30	60	21	27	28	32	21	30	36	36	49	56	21	11	11	0	4	13	46	16	17	16	21	20	26	46	20	66	32
cacd128eff4c191bcc5cb6e2a86e747c	ASV4281	Bacteria	Planctomycetota	Phycisphaerae	CCM11a	CCM11a	CCM11a	uncultured_Planctomycetales	0	0	0	0	0	0	26	35	7	14	0	0	0	0	12	0	0	0	23	0	0	0	0	0	0	17	0	20	6	17	0	30	13	19	0	0	0	18	17	0	0
65bbf22045599ae727cf14f2895ca745	ASV1782	Bacteria	Planctomycetota	Phycisphaerae	CCM11a	CCM11a	CCM11a	uncultured_bacterium	23	20	0	11	0	18	0	0	0	0	0	0	0	0	0	0	14	18	0	14	0	11	19	0	13	0	0	0	0	0	0	0	0	0	0	0	21	9	0	11	0
0f1953317f15c784a97ceb9bcbfe57e9	ASV124	Bacteria	Planctomycetota	Phycisphaerae	CCM11a	CCM11a	CCM11a	NA	12	19	9	0	14	15	0	11	0	0	0	8	0	27	5	0	9	5	0	0	13	0	4	0	9	11	0	0	0	0	12	0	0	0	0	10	0	0	0	6	0
14d9b762411f86d7d8637e93613418c6	ASV1396	Bacteria	Planctomycetota	Phycisphaerae	CCM11a	CCM11a	CCM11a	NA	0	0	7	0	0	0	0	8	0	0	0	0	6	0	0	5	0	0	0	4	0	0	0	0	0	6	0	7	0	0	0	0	0	0	0	5	15	0	0	0	0
9b7d1c8b1d0f3508fa5f68c335c230fb	ASV1239	Bacteria	Planctomycetota	Phycisphaerae	CCM11a	CCM11a	CCM11a	uncultured_Planctomycetales	0	0	16	0	0	0	0	0	0	0	0	0	0	0	0	0	0	0	0	0	12	0	0	23	0	0	0	0	0	0	0	0	0	0	0	14	0	0	0	0	0
e1d5a1b0eb0faffae486c8ae6c4575eb	ASV4738	Bacteria	Planctomycetota	Phycisphaerae	CCM11a	CCM11a	CCM11a	uncultured_Planctomycetales	0	0	42	0	0	0	0	0	0	0	0	0	0	0	0	0	0	0	0	0	0	0	0	0	0	0	0	0	0	0	0	0	0	0	0	0	0	0	0	0	0
80cbc19b8aa9616226ce0ed1adcdad2b	ASV1906	Bacteria	Planctomycetota	Phycisphaerae	CCM11a	CCM11a	CCM11a	uncultured_bacterium	0	0	0	0	0	0	0	6	0	0	0	0	0	0	0	0	0	0	0	0	0	0	0	0	0	0	0	0	0	0	0	0	0	0	0	0	0	0	0	0	12
d90a3b8a28f9bc36493659d5e80d9df4	ASV4506	Bacteria	Planctomycetota	Phycisphaerae	CCM11a	CCM11a	CCM11a	uncultured_planctomycete	0	0	0	0	0	0	0	8	0	0	0	0	0	0	0	0	0	0	0	0	0	0	0	0	0	0	0	0	0	0	0	0	4	10	0	0	0	0	0	0	0
c25fa523a9ec9c4f8c1b5308c7ba62c1	ASV4123	Bacteria	Planctomycetota	Phycisphaerae	CCM11a	CCM11a	CCM11a	uncultured_bacterium	0	0	0	0	0	0	0	0	0	0	0	0	6	0	0	0	0	0	0	0	0	0	0	0	0	0	0	0	0	0	0	0	0	7	8	0	0	0	0	0	0
41e1f2cb6ce99f09c0bca4ff746ddc02	ASV1596	Bacteria	Proteobacteria	Gammaproteobacteria	Cellvibrionales	Cellvibrionaceae	Aestuariicella	uncultured_bacterium	1467	525	933	817	2356	1054	131	378	252	192	107	525	520	388	568	1241	1337	1885	386	860	1460	904	1009	333	735	298	120	114	134	135	1536	209	134	116	690	1069	1961	1015	264	360	488
2815df9f3c19deb1c7d0d50e95565dc2	ASV2622	Bacteria	Proteobacteria	Gammaproteobacteria	Cellvibrionales	Cellvibrionaceae	Aestuariicella	NA	0	0	0	0	0	0	0	0	0	0	0	0	0	0	0	0	0	0	0	0	23	0	0	0	0	0	0	0	0	0	0	0	0	0	0	0	0	0	0	0	0
739e1e8edf0547dc434570ec39775f3e	ASV2435	Bacteria	Proteobacteria	Gammaproteobacteria	Cellvibrionales	Cellvibrionaceae	Agarilytica	NA	0	0	0	0	0	0	0	0	0	0	0	0	0	0	0	0	0	0	0	0	0	0	21	24	0	0	0	0	0	0	0	0	0	0	0	19	21	0	0	0	0
803b59e19c1eb0965bd72ad4fd2ba9b5	ASV2467	Bacteria	Proteobacteria	Gammaproteobacteria	Cellvibrionales	Spongiibacteraceae	BD1-7_clade	uncultured_deep-sea	79	57	19	65	73	32	32	26	51	0	34	20	18	0	36	47	59	72	36	51	62	48	98	120	41	0	75	41	0	0	42	73	35	66	33	26	126	85	29	69	90
35c43a05db9014e073ac0a83ae7602ef	ASV1553	Bacteria	Proteobacteria	Gammaproteobacteria	Cellvibrionales	Spongiibacteraceae	BD1-7_clade	uncultured_gamma	44	25	16	16	79	22	0	44	38	13	21	16	21	39	0	51	28	46	17	20	18	37	57	30	33	26	34	20	18	0	42	21	19	23	66	48	34	36	15	16	24
938bb770b6187622232e4df597118cf7	ASV2529	Bacteria	Proteobacteria	Gammaproteobacteria	Cellvibrionales	Spongiibacteraceae	BD1-7_clade	uncultured_bacterium	42	27	0	17	31	0	6	0	14	12	54	0	12	0	15	56	23	52	15	20	27	13	67	44	55	0	63	0	0	0	22	14	15	61	13	24	57	29	16	17	26
414df7f0069983057801801137618611	ASV2264	Bacteria	Proteobacteria	Gammaproteobacteria	Cellvibrionales	Spongiibacteraceae	BD1-7_clade	uncultured_gamma	25	75	55	28	0	0	30	0	0	0	0	0	0	0	0	0	29	25	0	0	96	0	0	81	0	117	0	83	37	58	0	0	101	0	14	0	0	0	0	19	0
dc09c0ca13fddaeb6e6305a61c047bfa	ASV4626	Bacteria	Proteobacteria	Gammaproteobacteria	Cellvibrionales	Spongiibacteraceae	BD1-7_clade	uncultured_gamma	29	17	17	17	41	27	0	14	10	0	0	0	0	0	18	19	33	29	0	31	0	36	29	15	22	20	0	11	0	0	21	37	0	0	37	42	66	23	0	14	10
cc86ad006dc512417684b92edf63b8d6	ASV4318	Bacteria	Proteobacteria	Gammaproteobacteria	Cellvibrionales	Spongiibacteraceae	BD1-7_clade	uncultured_deep-sea	32	18	0	27	0	0	0	28	0	0	0	0	0	20	25	0	39	0	17	43	0	0	64	0	0	39	0	0	0	0	0	0	19	0	0	0	82	24	0	0	0
5a3c08a69834dab04d35ccfb905152d4	ASV678	Bacteria	Proteobacteria	Gammaproteobacteria	Cellvibrionales	Spongiibacteraceae	BD1-7_clade	uncultured_gamma	0	0	0	0	11	0	0	43	37	0	32	0	0	25	0	13	0	0	27	23	0	19	0	0	18	0	41	0	0	0	0	32	0	37	0	0	19	17	0	0	0
1088b9e75eeaa711db45151b6c87855f	ASV2561	Bacteria	Proteobacteria	Gammaproteobacteria	Cellvibrionales	Spongiibacteraceae	BD1-7_clade	uncultured_deep-sea	0	0	0	0	31	0	36	0	0	38	20	0	0	0	0	0	0	0	13	0	39	35	0	0	0	0	40	0	0	0	0	0	12	24	0	0	0	0	33	34	0
555f88925d01b24d2a959f6b08b6187b	ASV2337	Bacteria	Proteobacteria	Gammaproteobacteria	Cellvibrionales	Spongiibacteraceae	BD1-7_clade	uncultured_bacterium	0	0	0	0	0	0	0	19	7	7	13	0	0	0	0	0	0	0	10	0	0	0	0	0	0	5	15	0	0	0	0	30	17	16	0	0	0	0	16	0	0
dc5a15b282e85e0ec8b08daf17cfc3c9	ASV4623	Bacteria	Proteobacteria	Gammaproteobacteria	Cellvibrionales	Spongiibacteraceae	BD1-7_clade	uncultured_bacterium	0	0	0	8	0	0	0	0	0	0	0	0	0	0	0	0	22	14	0	18	0	0	12	0	8	0	0	0	0	0	0	0	0	0	0	9	0	12	0	14	0
5e6ebe05f67f22f3075efc08c06a1d71	ASV766	Bacteria	Proteobacteria	Gammaproteobacteria	Cellvibrionales	Spongiibacteraceae	BD1-7_clade	uncultured_deep-sea	0	0	0	0	0	0	0	0	0	0	0	0	0	0	0	31	0	67	0	0	0	0	0	0	0	0	0	0	0	0	0	0	0	0	0	0	0	0	0	0	28
7855cc0476c67fadbe2b82dbb4b746b4	ASV2783	Bacteria	Proteobacteria	Gammaproteobacteria	Cellvibrionales	Spongiibacteraceae	BD1-7_clade	uncultured_bacterium	6	10	0	0	0	4	5	0	0	0	0	0	0	0	0	0	0	0	0	7	8	8	0	8	0	0	0	0	0	0	0	0	0	0	0	28	23	0	0	0	0
36cfa561ef189ae6ad3d7c6bdf9e5b1c	ASV1563	Bacteria	Proteobacteria	Gammaproteobacteria	Cellvibrionales	Spongiibacteraceae	BD1-7_clade	NA	0	0	0	0	12	0	0	0	7	0	0	0	0	0	0	0	5	7	0	0	0	0	12	20	0	9	0	0	0	0	0	8	7	4	10	7	0	0	0	0	0
bf3fd347b45452735762b42a2386101e	ASV4008	Bacteria	Proteobacteria	Gammaproteobacteria	Cellvibrionales	Spongiibacteraceae	BD1-7_clade	NA	0	0	0	0	0	0	0	0	10	0	0	0	0	0	0	0	18	0	0	0	0	0	0	0	0	0	0	0	0	0	0	0	0	0	57	0	0	0	0	0	0
6f7138854aa0c7a0b378b4d8fa825e26	ASV928	Bacteria	Proteobacteria	Gammaproteobacteria	Cellvibrionales	Spongiibacteraceae	BD1-7_clade	uncultured_deep-sea	9	0	0	0	0	0	0	0	0	0	0	0	0	0	0	9	16	0	0	4	0	0	0	0	0	0	0	0	0	0	0	0	0	0	0	26	10	0	0	0	10
9ddbdf99d2138d905d149ffee4999889	ASV1295	Bacteria	Proteobacteria	Gammaproteobacteria	Cellvibrionales	Spongiibacteraceae	BD1-7_clade	uncultured_gamma	0	0	0	0	0	0	0	0	0	0	0	0	0	0	17	23	13	0	0	0	0	0	0	0	0	0	0	0	0	0	0	0	6	0	8	9	8	0	0	0	0
2bb60e4e0d2fd70c7773be5b6c4f3993	ASV316	Bacteria	Proteobacteria	Gammaproteobacteria	Cellvibrionales	Spongiibacteraceae	BD1-7_clade	NA	35	0	0	0	0	0	0	0	0	0	17	0	0	0	0	10	0	0	0	0	8	0	0	0	6	0	0	0	0	0	0	0	0	0	0	0	0	0	0	0	0
4ea5e4f671bd4e40b3bdd4f36534f420	ASV642	Bacteria	Proteobacteria	Gammaproteobacteria	Cellvibrionales	Spongiibacteraceae	BD1-7_clade	uncultured_gamma	0	0	0	0	28	0	0	0	0	0	0	0	0	0	0	0	0	0	0	0	0	0	0	0	0	0	0	0	0	0	18	0	0	0	0	0	0	0	0	0	0
33b2303f4226b860f14d112c90acdc22	ASV1536	Bacteria	Proteobacteria	Gammaproteobacteria	Cellvibrionales	Spongiibacteraceae	BD1-7_clade	uncultured_bacterium	0	0	0	0	0	0	0	0	0	0	0	0	0	0	0	0	0	0	0	0	0	0	0	0	0	0	0	0	0	0	0	0	0	0	0	0	0	21	0	0	0
cae67fa4751775b7773fb14766134e42	ASV4283	Bacteria	Proteobacteria	Gammaproteobacteria	Cellvibrionales	Spongiibacteraceae	BD1-7_clade	uncultured_gamma	0	0	0	0	7	0	0	0	0	0	0	0	0	0	0	0	0	0	0	0	0	0	0	0	0	0	11	0	0	0	0	13	0	0	0	0	8	0	0	0	0
8626d360672f1c2b7e979e76194ffd3f	ASV2808	Bacteria	Proteobacteria	Gammaproteobacteria	Cellvibrionales	Spongiibacteraceae	BD1-7_clade	NA	0	0	0	0	0	0	0	0	0	0	0	0	0	0	0	0	14	0	0	0	0	0	0	0	0	0	0	0	0	0	0	0	0	0	12	0	9	0	0	0	0
dc62349c8b7c94dcff99f95555872176	ASV4634	Bacteria	Proteobacteria	Gammaproteobacteria	Cellvibrionales	Spongiibacteraceae	BD1-7_clade	NA	0	0	0	0	0	0	0	0	0	0	0	0	0	0	0	0	0	0	0	0	0	0	0	0	0	0	0	0	0	0	0	0	0	0	0	19	0	0	0	0	0
380da5577c8c8f32831c20ec74a14184	ASV2241	Bacteria	Proteobacteria	Gammaproteobacteria	Cellvibrionales	Spongiibacteraceae	BD1-7_clade	uncultured_organism	0	0	0	0	0	0	0	0	0	0	0	0	0	0	0	0	10	13	0	0	0	0	0	0	0	0	0	0	0	0	0	0	0	0	4	0	0	0	0	0	0
27cbf96ae21fdd9930156341c8b1f24d	ASV1489	Bacteria	Proteobacteria	Gammaproteobacteria	Cellvibrionales	Spongiibacteraceae	BD1-7_clade	uncultured_gamma	0	0	0	0	0	0	0	0	0	0	0	0	0	0	0	0	0	0	0	0	0	0	0	0	0	20	6	0	0	0	0	0	0	0	0	0	0	0	0	0	0
7e576ec27beb5b2eb3c21c696fe26108	ASV1028	Bacteria	Proteobacteria	Gammaproteobacteria	Cellvibrionales	Spongiibacteraceae	BD1-7_clade	NA	0	0	0	0	0	0	0	0	0	0	0	0	0	0	0	0	0	0	0	0	0	0	0	0	0	21	0	0	0	0	0	0	0	5	0	0	0	0	0	0	0
8b074566f703026173ea8c18de59b11f	ASV1109	Bacteria	Proteobacteria	Gammaproteobacteria	Cellvibrionales	Spongiibacteraceae	BD1-7_clade	NA	0	0	0	0	0	0	0	8	0	0	0	0	0	0	0	0	0	0	0	0	0	0	0	0	0	0	0	0	0	0	0	0	0	0	0	15	0	0	0	0	0
8c92c23ed1e61cbff2c1598457c8bdcc	ASV1124	Bacteria	Proteobacteria	Gammaproteobacteria	Cellvibrionales	Spongiibacteraceae	BD1-7_clade	uncultured_deep-sea	0	0	0	0	0	0	0	0	0	0	0	0	0	0	0	0	0	0	0	0	0	0	0	0	0	0	0	0	23	0	0	0	0	0	0	0	0	0	0	0	0
9da22bd72feebe680c3a60d49f1116af	ASV1291	Bacteria	Proteobacteria	Gammaproteobacteria	Cellvibrionales	Spongiibacteraceae	BD1-7_clade	uncultured_gamma	0	0	0	0	0	0	0	0	0	0	0	0	0	0	0	0	0	0	0	0	0	0	13	0	0	0	0	0	0	0	9	0	0	0	0	0	0	0	0	0	0
46fd7f9ede968d981564be6fc73372ee	ASV1640	Bacteria	Proteobacteria	Gammaproteobacteria	Cellvibrionales	Spongiibacteraceae	BD1-7_clade	uncultured_deep-sea	0	0	0	0	0	0	0	0	0	0	0	0	0	0	0	0	0	0	0	0	0	0	0	0	0	0	0	0	0	0	0	0	0	0	0	0	0	0	21	0	0
8a3cd7129f3b1f71fb2a6d835db77085	ASV1068	Bacteria	Proteobacteria	Gammaproteobacteria	Cellvibrionales	BD2-7	BD2-7	uncultured_organism	393	111	215	314	156	193	190	153	78	111	87	204	189	165	113	106	134	307	197	191	215	204	204	108	105	176	61	179	122	407	189	158	114	90	47	57	94	150	172	135	137
1697fb5232845f6d32065ae3a1d7a136	ASV2583	Bacteria	Proteobacteria	Gammaproteobacteria	Cellvibrionales	BD2-7	BD2-7	uncultured_bacterium	100	29	82	104	85	64	101	51	71	83	139	82	78	45	43	38	47	199	96	84	102	76	66	81	33	55	98	86	61	144	58	95	77	107	15	26	53	75	149	51	74
45119554f9421f493b8a5a1cc2a45905	ASV3296	Bacteria	Proteobacteria	Gammaproteobacteria	Cellvibrionales	BD2-7	BD2-7	uncultured_bacterium	43	27	17	110	25	17	72	171	63	39	63	54	0	38	0	0	21	41	76	35	26	28	39	26	0	61	67	144	51	248	37	71	53	88	0	0	27	41	76	0	0
089a096fd1442525b06d67b09ff5170b	ASV1992	Bacteria	Proteobacteria	Gammaproteobacteria	Cellvibrionales	BD2-7	BD2-7	uncultured_bacterium	0	0	0	0	0	0	47	52	0	0	0	0	50	0	0	0	0	0	0	0	0	0	0	0	0	79	0	38	0	189	0	52	55	0	0	0	0	0	0	27	32
a954b0f4406b84b5d3cd91e666f2377a	ASV3533	Bacteria	Proteobacteria	Gammaproteobacteria	Cellvibrionales	BD2-7	BD2-7	uncultured_bacterium	0	0	0	0	0	0	0	0	0	0	0	0	0	0	0	0	0	0	0	0	0	0	0	0	0	0	0	19	0	15	0	0	0	0	0	0	0	0	0	0	0
b7ab5cfccb57a462038f5e19fc821e5f	ASV3744	Bacteria	Proteobacteria	Gammaproteobacteria	Cellvibrionales	BD2-7	BD2-7	NA	0	0	0	0	0	0	0	0	0	0	0	0	0	0	0	0	0	0	0	0	0	0	0	0	0	0	0	27	0	0	0	0	0	0	0	0	0	0	0	0	0
2853adca662ae4d16ce98b0a79febed7	ASV2625	Bacteria	Proteobacteria	Gammaproteobacteria	Cellvibrionales	Porticoccaceae	C1-B045	Cladosiphon_okamuranus	0	135	301	15	0	12	259	135	69	37	144	20	6	0	29	32	11	33	45	0	54	36	52	18	0	195	67	216	176	59	0	105	42	70	0	0	0	45	182	32	0
33e0b7bfe7892a640404f6806eff716a	ASV1542	Bacteria	Proteobacteria	Gammaproteobacteria	Cellvibrionales	Porticoccaceae	C1-B045	uncultured_bacterium	18	12	0	0	9	0	0	10	0	6	0	0	0	0	0	0	0	9	0	0	20	0	0	0	0	0	0	0	0	0	21	0	0	0	0	0	25	0	0	0	0
7c53f53a631b9d4d8ce71c4090095d3a	ASV992	Bacteria	Proteobacteria	Gammaproteobacteria	Cellvibrionales	Porticoccaceae	C1-B045	Cladosiphon_okamuranus	0	0	0	0	0	0	0	0	0	0	0	0	0	0	0	0	0	0	0	0	0	0	0	0	0	0	28	0	0	0	0	0	0	0	0	0	0	0	0	0	0
1488297cd3516a769b5cf8578992b8be	ASV3203	Bacteria	Proteobacteria	Gammaproteobacteria	Cellvibrionales	Porticoccaceae	C1-B045	Cladosiphon_okamuranus	0	0	0	0	0	0	0	0	0	0	0	0	0	0	0	0	0	0	13	0	0	0	0	0	0	0	0	11	0	0	0	0	0	0	0	0	0	0	0	0	0
0de69f1d7d66302e42fa25ca32c4a1af	ASV79	Bacteria	Proteobacteria	Gammaproteobacteria	Cellvibrionales	Cellvibrionaceae	Candidatus_Endobugula	uncultured_Eionea	201	315	50	105	11	23	0	27	0	0	12	14	17	38	10	262	67	102	7	221	38	197	22	1059	275	0	0	0	0	0	42	0	0	10	92	165	14	87	0	68	89
099e2565566a5898b4f1bdb3c7801641	ASV2090	Bacteria	Proteobacteria	Gammaproteobacteria	Cellvibrionales	Cellvibrionaceae	Candidatus_Endobugula	uncultured_Eionea	0	0	0	0	0	0	0	0	0	0	0	0	0	0	0	0	0	33	0	0	0	0	0	31	0	0	0	0	0	0	0	0	0	0	0	0	0	0	0	0	0
6e49c1f9c67bfe71afa5a8c9d2e8de2b	ASV896	Bacteria	Proteobacteria	Gammaproteobacteria	Cellvibrionales	Cellvibrionaceae	Candidatus_Endobugula	uncultured_Eionea	0	0	0	0	0	0	0	34	0	0	0	0	0	0	0	0	0	0	0	0	0	0	0	0	0	0	0	0	0	0	0	0	0	0	0	0	0	0	0	26	0
a46bc08d0beda6435f283ed75ce490aa	ASV3476	Bacteria	Proteobacteria	Gammaproteobacteria	Cellvibrionales	Cellvibrionaceae	Cellvibrionaceae	uncultured_bacterium	21	22	0	0	10	0	24	20	0	0	0	9	0	0	9	0	40	27	0	29	24	0	0	0	0	26	0	0	0	0	0	0	0	0	19	33	17	19	0	0	11
c4283a7ae5223838e0bd0cbe465aa39b	ASV4219	Bacteria	Proteobacteria	Gammaproteobacteria	Cellvibrionales	Cellvibrionaceae	Cellvibrionaceae	uncultured_bacterium	0	0	0	0	0	0	0	152	0	0	0	0	0	0	0	0	0	0	0	0	0	0	0	0	0	0	0	0	0	0	0	0	0	0	0	0	0	0	0	0	0
80f01283e09946b0f6917e21237329c0	ASV1910	Bacteria	Proteobacteria	Gammaproteobacteria	Cellvibrionales	Cellvibrionaceae	Cellvibrionaceae	uncultured_bacterium	0	0	0	0	0	0	0	0	0	0	0	0	0	0	0	0	0	0	0	0	0	0	0	0	0	0	0	0	0	0	0	0	0	0	0	0	0	0	0	0	121
2bc5fad50387fcfd047aecb6b7ca2078	ASV318	Bacteria	Proteobacteria	Gammaproteobacteria	Cellvibrionales	Cellvibrionaceae	Cellvibrionaceae	uncultured_bacterium	0	0	0	13	0	0	0	0	0	0	0	0	0	0	0	0	0	0	9	0	0	0	0	0	25	0	12	0	0	0	0	0	20	0	0	0	0	0	0	0	0
2283740c34b6b21dc73511d6e406b90c	ASV3211	Bacteria	Proteobacteria	Gammaproteobacteria	Cellvibrionales	Cellvibrionales	Cellvibrionales	bacterium_BW3SW37	0	0	0	0	0	0	0	0	0	0	0	0	0	0	0	0	0	0	7	0	0	0	0	0	0	0	0	0	0	0	0	0	9	0	0	0	0	0	20	0	0
90489e0f7643a90ef7be5328f4a1d0a5	ASV3036	Bacteria	Proteobacteria	Gammaproteobacteria	Cellvibrionales	Cellvibrionales	Cellvibrionales	bacterium_BW3SW37	0	0	0	0	0	0	0	0	0	0	0	0	0	0	0	0	0	0	0	0	0	0	0	0	0	0	22	0	0	0	0	0	0	0	0	0	0	0	0	0	0
1c5fd866c14ab221289e4de3adcfa37c	ASV179	Bacteria	Proteobacteria	Gammaproteobacteria	Cellvibrionales	Spongiibacteraceae	Dasania	uncultured_bacterium	0	0	0	0	0	0	39	0	0	0	0	0	0	0	0	0	0	0	0	0	0	0	0	0	0	0	0	0	0	0	0	0	0	0	0	0	0	0	0	0	0
4b1333e7454611eae497b209e36bdc51	ASV562	Bacteria	Proteobacteria	Gammaproteobacteria	Cellvibrionales	Spongiibacteraceae	Dasania	uncultured_bacterium	0	0	0	0	0	0	0	0	0	0	0	0	0	0	35	0	0	0	0	0	0	0	0	0	0	0	0	0	0	0	0	0	0	0	0	0	0	0	0	0	0
b879cdc394957f41b6e86dba1615044a	ASV3847	Bacteria	Proteobacteria	Gammaproteobacteria	Cellvibrionales	Halieaceae	Halioglobus	NA	294	420	115	526	134	119	294	187	107	146	287	101	138	75	171	325	273	252	191	443	385	419	182	569	95	154	339	267	124	206	106	132	111	241	136	99	152	192	260	362	290
988957a1e51d66246d6a17765a010bff	ASV3197	Bacteria	Proteobacteria	Gammaproteobacteria	Cellvibrionales	Halieaceae	Halioglobus	NA	72	51	109	98	149	96	0	60	46	0	0	83	88	122	55	50	75	152	123	76	103	116	109	97	68	68	0	78	0	59	203	54	0	55	102	98	61	130	0	69	78
edc63c841b079d3e6155d4352f7fe055	ASV5017	Bacteria	Proteobacteria	Gammaproteobacteria	Cellvibrionales	Halieaceae	Halioglobus	NA	23	19	57	31	65	52	69	47	34	34	49	28	67	61	12	0	25	44	77	39	51	44	70	38	18	82	23	145	74	66	61	40	52	88	19	0	0	36	83	16	24
5763529d14e7e473cd9364eb9dd20ee2	ASV3240	Bacteria	Proteobacteria	Gammaproteobacteria	Cellvibrionales	Halieaceae	Halioglobus	NA	0	0	0	0	0	0	0	0	0	0	0	0	0	0	0	0	0	0	0	0	0	0	0	0	0	0	0	0	45	0	0	0	0	0	0	0	0	0	61	0	0
a1ffbba94fb5c7f217df5c121fff7c3d	ASV3405	Bacteria	Proteobacteria	Gammaproteobacteria	Cellvibrionales	Halieaceae	Halioglobus	Halioglobus_japonicus	0	0	0	0	0	0	0	0	0	0	0	0	0	0	0	11	0	0	0	0	13	16	0	0	0	0	0	0	0	0	0	0	0	0	0	0	14	0	0	0	0
1e84c2b7d2c8c87c5749549a5944eb5a	ASV239	Bacteria	Proteobacteria	Gammaproteobacteria	Cellvibrionales	Halieaceae	Halioglobus	NA	0	0	0	0	0	0	0	0	0	0	0	0	0	0	0	0	0	0	0	0	0	0	0	0	0	0	0	0	0	0	0	0	0	0	27	23	0	0	0	0	0
54c8042a2f43874fffd44a05434d1146	ASV1692	Bacteria	Proteobacteria	Gammaproteobacteria	Cellvibrionales	Halieaceae	Halioglobus	NA	0	0	0	0	0	0	36	0	0	0	0	0	0	0	0	0	0	0	0	0	0	0	0	0	0	0	0	0	0	0	0	0	0	0	0	0	0	0	0	0	0
3e3af66b858ecc0b23ffd2d065638a3e	ASV498	Bacteria	Proteobacteria	Gammaproteobacteria	Cellvibrionales	Halieaceae	Halioglobus	NA	0	0	0	0	0	0	0	0	0	0	0	0	0	0	0	0	0	0	0	0	0	0	0	0	0	0	0	0	0	0	0	0	0	0	0	0	0	0	0	0	0
80e068beb96683d900e230b0a321906a	ASV1907	Bacteria	Proteobacteria	Gammaproteobacteria	Cellvibrionales	Halieaceae	Halioglobus	uncultured_gamma	0	0	0	12	0	0	0	0	0	0	0	0	0	0	0	0	0	0	0	0	0	0	0	0	0	0	0	0	0	0	0	0	0	0	0	0	14	0	0	0	0
a18369048558d2cf7b6e36fb12915453	ASV3578	Bacteria	Proteobacteria	Gammaproteobacteria	Cellvibrionales	Halieaceae	Luminiphilus	uncultured_gamma	0	0	0	0	0	0	0	0	0	0	0	0	0	0	0	0	0	0	0	0	0	0	0	0	0	0	0	0	0	0	0	0	0	0	0	0	0	0	0	0	0
da8df47535bfd2de89c3d52a202c3c86	ASV4582	Bacteria	Proteobacteria	Gammaproteobacteria	Cellvibrionales	Cellvibrionaceae	Maricurvus	Maricurvus_nonylphenolicus	176	73	64	86	227	77	48	83	68	45	27	47	52	48	60	123	177	229	51	140	124	117	109	54	158	81	40	40	0	26	147	94	45	35	85	143	236	119	77	35	77
7822237cfa0dea748a2aae4e7b2f52fc	ASV3256	Bacteria	Proteobacteria	Gammaproteobacteria	Cellvibrionales	Halieaceae	NA	NA	358	252	251	285	215	249	365	339	266	164	498	292	235	164	263	200	234	400	389	246	327	239	509	443	256	734	375	544	287	419	289	214	292	538	532	585	272	364	301	199	266
96421c90b2e89ead2aba7158e5ce8990	ASV3048	Bacteria	Proteobacteria	Gammaproteobacteria	Cellvibrionales	Halieaceae	NA	NA	336	495	362	265	222	332	48	117	0	0	88	224	308	263	292	446	285	564	113	474	524	271	340	957	394	129	0	0	0	0	334	97	70	240	285	471	403	387	0	568	442
34af0880ed44bc80b76287cfbdf45f9c	ASV1544	Bacteria	Proteobacteria	Gammaproteobacteria	Cellvibrionales	Halieaceae	NA	NA	84	147	196	127	127	116	225	220	98	184	93	100	82	148	170	0	0	204	140	90	136	99	235	0	0	368	76	1177	1152	1255	185	137	156	188	75	81	0	588	231	195	92
4cda88a524db5d565ac76c1bccdd90c5	ASV595	Bacteria	Proteobacteria	Gammaproteobacteria	Cellvibrionales	Halieaceae	NA	NA	185	94	154	165	216	125	114	233	127	0	0	159	104	171	113	132	150	211	138	167	137	235	270	156	96	184	98	109	75	153	131	112	148	132	158	130	242	233	134	130	88
17bd252ba33accc1fc56baebf4c4a33f	ASV1416	Bacteria	Proteobacteria	Gammaproteobacteria	Cellvibrionales	Halieaceae	NA	NA	99	121	97	130	67	67	0	11	20	0	0	97	46	82	57	41	48	105	24	207	50	92	190	80	138	26	0	0	0	0	87	13	11	0	19	39	85	156	0	55	67
79bcf5cf5cbea724e6e0abb50603db74	ASV1899	Bacteria	Proteobacteria	Gammaproteobacteria	Cellvibrionales	NA	NA	NA	0	0	0	0	0	0	91	172	112	106	144	0	0	0	0	0	0	0	88	0	0	0	0	0	0	184	127	156	104	133	57	160	149	149	0	0	0	0	123	0	0
f1f3e5c49de22f7d8c6fffe254e5829f	ASV5088	Bacteria	Proteobacteria	Gammaproteobacteria	Cellvibrionales	Halieaceae	NA	NA	0	54	198	77	111	69	0	0	0	0	0	229	67	94	100	0	0	54	138	0	38	59	125	0	0	0	0	0	0	0	77	0	0	0	0	0	0	141	0	0	0
4d08cf885e3bb0bf7d5faa36efcd5499	ASV603	Bacteria	Proteobacteria	Gammaproteobacteria	Cellvibrionales	Halieaceae	NA	NA	0	0	87	0	234	174	0	0	0	0	0	0	0	140	0	0	0	74	198	92	91	113	149	0	0	0	0	0	0	0	109	0	0	0	0	0	0	197	0	0	0
a7a7e520675d237eeaacba800353c2d6	ASV3437	Bacteria	Proteobacteria	Gammaproteobacteria	Cellvibrionales	Halieaceae	NA	NA	65	0	0	93	69	0	109	43	45	52	0	0	38	0	0	0	28	66	0	0	39	73	0	99	88	53	59	37	0	39	0	0	27	52	0	94	52	0	54	96	91
868de41122b585cdf3cd47411f00a8b4	ASV2496	Bacteria	Proteobacteria	Gammaproteobacteria	Cellvibrionales	Cellvibrionaceae	NA	NA	28	15	0	16	0	12	84	93	88	43	50	0	0	0	0	0	24	12	76	21	0	19	0	29	0	127	80	116	64	81	23	105	87	107	0	0	0	0	106	0	0
15baac3e301f3a886ad558d0d62997d1	ASV1403	Bacteria	Proteobacteria	Gammaproteobacteria	Cellvibrionales	Halieaceae	NA	NA	57	28	0	75	61	40	0	0	0	0	0	0	36	50	0	65	62	78	51	48	42	45	0	70	0	0	0	0	0	0	44	0	0	0	0	71	54	70	0	41	47
f6fe1f45417fea1958f1988aac9f2d89	ASV5131	Bacteria	Proteobacteria	Gammaproteobacteria	Cellvibrionales	Halieaceae	NA	NA	28	0	0	32	0	0	25	39	21	21	20	0	45	26	0	0	25	35	50	24	27	23	42	37	0	63	28	24	43	33	33	0	41	24	39	67	30	49	38	0	18
fb59160b390a80c652c7a593d9287bf7	ASV5310	Bacteria	Proteobacteria	Gammaproteobacteria	Cellvibrionales	Spongiibacteraceae	NA	NA	72	36	0	19	0	0	0	21	0	0	69	0	16	13	0	46	0	26	24	32	66	37	35	0	25	25	35	0	0	0	0	0	0	43	0	68	206	0	0	19	46
dad4410e54c986d0c41de7bc23160fa8	ASV4595	Bacteria	Proteobacteria	Gammaproteobacteria	Cellvibrionales	Halieaceae	NA	NA	0	0	0	117	0	0	0	0	0	0	0	95	0	42	0	0	0	40	0	0	0	62	82	0	70	0	0	0	0	0	78	0	39	0	62	64	0	0	0	0	0
ad4d7cd1042ff10d38dcefb0f022eb21	ASV3638	Bacteria	Proteobacteria	Gammaproteobacteria	Cellvibrionales	Halieaceae	NA	NA	101	0	0	0	0	0	0	0	0	0	0	0	0	0	0	0	0	61	0	76	57	0	0	0	0	0	0	0	0	0	57	0	0	0	0	79	0	0	0	0	64
cb6e488cfcf0802a3f28abc6c9205d99	ASV4289	Bacteria	Proteobacteria	Gammaproteobacteria	Cellvibrionales	Halieaceae	NA	NA	24	0	49	33	119	0	0	0	0	0	0	0	0	57	0	0	0	59	0	0	0	40	0	0	0	0	0	0	0	0	0	0	0	0	0	0	0	89	0	0	0
a66f4d7d07e81fc9869ce683f4e90616	ASV3488	Bacteria	Proteobacteria	Gammaproteobacteria	Cellvibrionales	Halieaceae	NA	NA	0	0	0	0	20	12	27	45	0	0	32	0	14	19	0	0	0	19	18	18	0	0	14	25	0	40	39	22	35	19	0	23	23	54	13	0	0	0	24	0	0
96930d66c96e253cb8e9d4d4b198b307	ASV3050	Bacteria	Proteobacteria	Gammaproteobacteria	Cellvibrionales	NA	NA	NA	0	0	0	0	48	0	0	0	0	0	0	32	0	30	0	28	0	48	0	0	47	0	0	0	0	0	0	0	0	0	34	0	0	0	0	0	0	44	0	37	0
732be5ad3b32a1cdb5be600ea83e885c	ASV2430	Bacteria	Proteobacteria	Gammaproteobacteria	Cellvibrionales	Cellvibrionaceae	NA	NA	12	0	32	0	0	19	0	0	0	0	0	0	0	0	0	38	29	21	0	0	19	0	0	9	0	0	0	0	0	0	14	0	0	0	0	0	125	0	0	25	0
0999e9170e36ae42ca746c351e142c49	ASV2558	Bacteria	Proteobacteria	Gammaproteobacteria	Cellvibrionales	Halieaceae	NA	NA	111	0	0	0	0	0	0	0	0	0	57	0	0	0	0	0	0	83	0	0	0	0	0	28	0	0	0	0	0	0	0	0	0	24	0	0	0	0	0	0	35
0073ca3ec2a2ccd3b861ef1f18aefebe	ASV1851	Bacteria	Proteobacteria	Gammaproteobacteria	Cellvibrionales	Cellvibrionaceae	NA	NA	0	0	0	0	32	21	0	0	0	0	0	0	0	0	0	0	23	0	0	0	0	18	0	23	11	0	0	0	0	0	0	0	0	0	92	42	0	0	19	15	0
663791a21a479999cc460a022fab6677	ASV3156	Bacteria	Proteobacteria	Gammaproteobacteria	Cellvibrionales	Spongiibacteraceae	NA	NA	0	0	0	0	11	0	0	0	0	0	0	0	0	0	0	18	0	24	22	0	0	0	0	0	18	23	20	0	0	0	31	0	0	0	0	0	44	0	31	17	21
c6c0ad3110b3f040dbf7b75ecf4042c5	ASV4080	Bacteria	Proteobacteria	Gammaproteobacteria	Cellvibrionales	NA	NA	NA	0	0	0	0	0	0	0	0	13	0	0	0	0	0	0	9	0	0	183	0	0	0	0	0	0	0	7	0	0	0	0	0	0	0	0	0	0	0	0	0	0
7821d8e2278c60d875d2c9b4bd29c25d	ASV2780	Bacteria	Proteobacteria	Gammaproteobacteria	Cellvibrionales	Cellvibrionaceae	NA	NA	36	0	0	0	10	0	0	0	0	0	0	8	6	0	13	0	19	13	0	9	0	0	0	0	0	0	0	0	0	0	15	0	0	0	7	18	37	12	0	0	6
9071b6963487f383df4b38ee9c111104	ASV2826	Bacteria	Proteobacteria	Gammaproteobacteria	Cellvibrionales	Spongiibacteraceae	NA	NA	36	0	0	0	19	0	0	0	24	0	0	0	0	0	0	0	0	0	27	0	24	12	0	13	0	24	0	13	0	0	0	0	0	0	0	14	0	0	0	0	0
e1d3f771bba5e8ebbdbfd3d96858a362	ASV4737	Bacteria	Proteobacteria	Gammaproteobacteria	Cellvibrionales	Spongiibacteraceae	NA	NA	0	0	20	0	0	0	0	0	0	0	0	0	0	0	22	0	40	0	0	0	0	0	0	0	0	0	0	0	0	0	95	0	0	0	0	0	0	0	0	0	0
3caccac30ae4e693d9c905483f09cc97	ASV469	Bacteria	Proteobacteria	Gammaproteobacteria	Cellvibrionales	Halieaceae	NA	NA	0	0	0	0	0	0	0	27	0	0	0	0	0	0	0	0	0	0	0	0	0	0	0	0	0	14	24	0	0	0	0	26	27	26	0	0	0	0	24	0	0
c298b55c792b370945002dc2eb2f6e55	ASV4181	Bacteria	Proteobacteria	Gammaproteobacteria	Cellvibrionales	Cellvibrionaceae	NA	NA	86	0	0	10	0	0	0	0	0	0	0	0	0	0	0	0	7	0	0	0	0	0	16	0	0	0	0	0	4	0	0	0	0	0	0	0	12	0	0	0	0
df24135b89202074c5d2a6c3342dbc5e	ASV4702	Bacteria	Proteobacteria	Gammaproteobacteria	Cellvibrionales	Spongiibacteraceae	NA	NA	0	0	0	0	0	0	0	0	0	0	31	0	0	0	0	11	0	0	0	0	0	0	0	0	0	0	26	0	0	0	0	0	20	0	0	0	22	0	28	0	0
29b90b1fd3f9e1422c80e3c3f3227719	ASV1504	Bacteria	Proteobacteria	Gammaproteobacteria	Cellvibrionales	Spongiibacteraceae	NA	NA	20	0	0	0	0	6	0	0	0	0	0	0	0	0	0	0	0	14	0	0	0	0	0	0	0	0	0	0	0	0	12	0	0	36	0	0	33	0	11	0	0
0cf1d730c21152786901e3ad96b2fc45	ASV61	Bacteria	Proteobacteria	Gammaproteobacteria	Cellvibrionales	Halieaceae	NA	NA	0	0	0	0	0	0	0	0	15	0	32	0	0	0	0	0	0	0	0	0	0	0	17	0	0	0	23	24	0	0	0	0	0	0	0	0	0	0	13	0	0
1578d6dc62f51f0e5426d5c426e12c4d	ASV2575	Bacteria	Proteobacteria	Gammaproteobacteria	Cellvibrionales	Spongiibacteraceae	NA	NA	0	0	0	0	8	0	0	0	0	0	0	0	0	0	0	15	0	0	0	0	0	0	0	15	0	0	0	0	0	0	11	0	0	0	0	0	16	16	10	0	15
264e0a83bc3404b961599fb42d91b81b	ASV2172	Bacteria	Proteobacteria	Gammaproteobacteria	Cellvibrionales	Cellvibrionaceae	NA	NA	0	0	0	0	0	0	0	0	0	0	0	0	0	0	0	0	93	0	0	0	0	0	0	0	0	0	0	0	0	0	0	0	0	0	0	0	0	0	0	0	0
291e83feda2905806cdde1ab90107af4	ASV2191	Bacteria	Proteobacteria	Gammaproteobacteria	Cellvibrionales	Cellvibrionaceae	NA	NA	0	0	0	0	0	0	0	0	0	0	0	0	0	0	0	0	37	0	0	0	0	0	0	0	0	0	0	0	0	0	0	0	0	0	52	0	0	0	0	0	0
9edf123702c56ce36798ce5e618537be	ASV1329	Bacteria	Proteobacteria	Gammaproteobacteria	Cellvibrionales	Halieaceae	NA	NA	0	0	0	0	0	0	0	0	0	0	0	0	0	0	0	0	0	19	0	0	0	0	16	0	0	0	9	0	0	0	0	0	0	0	0	0	0	0	27	0	0
d3f88f38789ff0c92294238cbc9138c0	ASV4429	Bacteria	Proteobacteria	Gammaproteobacteria	Cellvibrionales	Halieaceae	NA	NA	0	21	0	0	0	0	0	0	0	0	0	17	0	0	0	0	0	0	0	0	0	0	19	0	0	0	0	0	0	0	21	0	0	0	0	0	0	0	0	0	0
abb6f1fe7b683922046ef76c6a81bb11	ASV3607	Bacteria	Proteobacteria	Gammaproteobacteria	Cellvibrionales	Halieaceae	NA	NA	7	0	0	0	10	0	0	0	0	0	0	0	0	0	0	0	0	0	11	0	0	0	13	0	0	11	0	0	0	0	0	0	0	0	0	0	0	0	0	0	0
270dbc0d6612616030f556bfdff54055	ASV2175	Bacteria	Proteobacteria	Gammaproteobacteria	Cellvibrionales	Spongiibacteraceae	NA	NA	0	0	0	0	0	0	27	0	0	0	44	0	0	0	0	0	0	0	0	0	0	0	0	0	0	0	0	0	0	0	0	0	0	0	0	0	0	0	0	0	0
66aa24867fd012fc1b3071b641766930	ASV1789	Bacteria	Proteobacteria	Gammaproteobacteria	Cellvibrionales	Cellvibrionaceae	NA	NA	0	0	0	0	0	0	0	32	0	18	0	0	0	0	0	0	0	0	0	0	0	0	0	0	0	0	0	0	0	0	14	0	0	0	0	0	0	0	0	0	0
65ba4cf65a99268c90368951e9f2338c	ASV1781	Bacteria	Proteobacteria	Gammaproteobacteria	Cellvibrionales	Cellvibrionaceae	NA	NA	0	0	33	0	0	0	0	0	0	0	0	0	0	0	0	0	0	0	0	0	0	0	12	0	0	0	0	0	0	0	0	0	0	0	0	0	0	0	0	0	0
79fe02a147ceb02708645d2edb8f9e3b	ASV1903	Bacteria	Proteobacteria	Gammaproteobacteria	Cellvibrionales	Cellvibrionaceae	NA	NA	0	0	0	0	0	0	0	0	0	0	0	0	0	0	0	0	0	0	0	0	4	0	0	0	58	0	0	0	0	0	0	0	0	0	0	0	0	0	0	0	0
6f5e6dd09420414f2e87e9b40b6d73dc	ASV914	Bacteria	Proteobacteria	Gammaproteobacteria	Cellvibrionales	Spongiibacteraceae	NA	NA	0	0	0	12	0	0	0	0	0	0	0	0	0	0	0	11	0	0	0	0	8	0	0	0	0	0	0	0	0	0	0	0	0	0	0	0	0	0	0	0	14
d3ddf9e4b32960606a59074b7f0afb69	ASV4427	Bacteria	Proteobacteria	Gammaproteobacteria	Cellvibrionales	Spongiibacteraceae	NA	NA	0	0	0	0	0	0	0	0	0	0	0	0	0	0	0	0	0	0	0	0	0	0	0	0	0	0	0	0	7	8	0	25	0	0	0	0	0	0	0	0	0
9afa88098d33c6beb6aac728b5d8f66b	ASV1231	Bacteria	Proteobacteria	Gammaproteobacteria	Cellvibrionales	Porticoccaceae	NA	NA	0	0	0	0	0	0	10	9	0	0	0	0	0	0	0	0	0	0	0	0	0	0	0	0	0	0	0	0	0	0	0	0	0	0	0	0	0	0	20	0	0
903559cff36fa7782f30b7556a89def3	ASV3184	Bacteria	Proteobacteria	Gammaproteobacteria	Cellvibrionales	Cellvibrionaceae	NA	NA	0	0	0	0	0	0	0	0	0	0	0	0	0	0	0	0	0	0	0	0	0	0	0	0	0	8	29	0	0	0	0	0	0	0	0	0	0	0	0	0	0
8128f4681e2b04683c5a788116e8e160	ASV2796	Bacteria	Proteobacteria	Gammaproteobacteria	Cellvibrionales	Spongiibacteraceae	NA	NA	0	0	0	0	0	0	0	0	0	0	0	0	0	0	0	0	0	0	0	0	0	0	0	34	0	0	0	0	0	0	0	0	0	0	0	0	0	0	0	0	0
fa4af62dae8975d44598a38de39a683d	ASV5273	Bacteria	Proteobacteria	Gammaproteobacteria	Cellvibrionales	Cellvibrionaceae	NA	NA	0	0	0	9	0	0	0	0	0	0	0	0	0	0	0	0	0	0	0	0	0	0	0	0	0	0	0	0	0	0	0	0	0	22	0	0	0	0	0	0	0
76720d86b93dcca9aaffb39fd2e085e3	ASV3009	Bacteria	Proteobacteria	Gammaproteobacteria	Cellvibrionales	NA	NA	NA	0	0	0	0	0	0	0	0	0	0	0	0	0	0	0	0	0	0	0	0	0	0	0	0	0	0	0	0	0	0	0	0	0	0	4	25	0	0	0	0	0
3d0e3dd8824bf0982bcae12311eb0009	ASV474	Bacteria	Proteobacteria	Gammaproteobacteria	Cellvibrionales	Cellvibrionaceae	NA	NA	0	0	0	0	0	0	0	0	0	0	0	0	0	0	0	0	0	0	0	0	0	0	0	0	0	0	0	0	0	0	0	0	0	0	0	0	0	0	0	0	0
a6460db9ae0f04ed02ddde488d2b3d18	ASV3543	Bacteria	Proteobacteria	Gammaproteobacteria	Cellvibrionales	Spongiibacteraceae	NA	NA	0	0	0	0	0	0	0	0	0	0	0	0	0	0	0	0	0	0	0	0	0	0	0	0	0	0	0	26	0	0	0	0	0	0	0	0	0	0	0	0	0
4545bfb04b1a6af23f6168dddc03c744	ASV2675	Bacteria	Proteobacteria	Gammaproteobacteria	Cellvibrionales	Porticoccaceae	NA	NA	0	0	0	0	0	0	0	0	0	0	0	0	0	0	0	0	0	0	0	0	0	0	0	0	0	0	0	0	0	0	0	0	0	0	0	25	0	0	0	0	0
35758c5ed15bf69d106ce4081ae09daf	ASV2928	Bacteria	Proteobacteria	Gammaproteobacteria	Cellvibrionales	Halieaceae	NA	NA	0	0	0	0	0	0	0	0	0	0	0	0	0	0	0	23	0	0	0	0	0	0	0	0	0	0	0	0	0	0	0	0	0	0	0	0	0	0	0	0	0
0632345ac59f1ebbc515fee21a524420	ASV3147	Bacteria	Proteobacteria	Gammaproteobacteria	Cellvibrionales	Halieaceae	OM60_NOR5__clade	NA	66	89	64	85	97	70	317	388	268	52	83	107	78	85	54	49	63	83	151	68	97	81	86	153	59	462	115	174	163	97	118	157	325	244	52	89	63	101	238	50	53
c83a90dda74d887428d065f95bf07833	ASV4160	Bacteria	Proteobacteria	Gammaproteobacteria	Cellvibrionales	Halieaceae	OM60_NOR5__clade	NA	29	36	47	28	55	47	0	23	16	0	0	0	32	59	27	42	59	50	31	64	38	72	36	52	48	44	0	23	38	21	59	16	24	16	35	65	20	49	27	65	24
853dfe56a2a079415d1f06e77603e6e8	ASV2486	Bacteria	Proteobacteria	Gammaproteobacteria	Cellvibrionales	Halieaceae	OM60_NOR5__clade	NA	0	101	0	0	0	0	28	40	68	0	33	0	0	0	17	0	0	0	0	0	28	0	30	0	0	70	57	0	29	0	0	23	40	53	39	24	0	0	0	0	0
d6899cd90dbb2854ae4928254ccc99be	ASV4546	Bacteria	Proteobacteria	Gammaproteobacteria	Cellvibrionales	Halieaceae	OM60_NOR5__clade	NA	0	12	0	19	0	0	0	42	23	0	21	0	0	0	0	0	11	31	0	37	0	0	0	20	0	34	0	0	22	0	0	24	40	61	0	22	0	0	0	0	0
f1096871c7839af749fee16eec848e8e	ASV5257	Bacteria	Proteobacteria	Gammaproteobacteria	Cellvibrionales	Halieaceae	OM60_NOR5__clade	NA	26	8	0	35	14	0	0	0	0	0	0	0	0	0	0	19	0	31	0	38	19	18	0	0	18	0	0	0	0	0	22	0	0	0	0	21	21	25	0	0	17
cb9a7404c07ffacefbd1daf81cb4f1fa	ASV4290	Bacteria	Proteobacteria	Gammaproteobacteria	Cellvibrionales	Halieaceae	OM60_NOR5__clade	NA	0	0	17	0	28	12	30	0	0	0	0	0	17	15	0	0	0	0	38	0	0	0	0	0	25	0	64	0	0	0	25	0	0	0	0	0	16	28	28	0	0
e5a01edb80af620ebc1375bbc30b346e	ASV4770	Bacteria	Proteobacteria	Gammaproteobacteria	Cellvibrionales	Halieaceae	OM60_NOR5__clade	NA	0	0	0	0	0	0	10	18	13	0	0	0	0	0	0	0	0	0	0	0	0	0	0	0	0	63	0	0	13	9	0	0	25	0	0	0	0	0	17	0	0
0a7352fa536da8d218d01acddda4125e	ASV9	Bacteria	Proteobacteria	Gammaproteobacteria	Cellvibrionales	Halieaceae	OM60_NOR5__clade	NA	0	0	0	0	0	0	0	10	0	0	0	0	0	0	0	0	0	0	0	0	0	0	0	0	0	34	11	8	11	0	0	0	0	0	0	0	0	0	15	0	0
2ec52447bf62cb8976343a35b3b767de	ASV379	Bacteria	Proteobacteria	Gammaproteobacteria	Cellvibrionales	Halieaceae	OM60_NOR5__clade	NA	0	0	0	0	0	0	0	0	0	0	0	0	9	0	0	0	0	0	8	0	0	0	0	0	0	0	0	0	0	0	0	0	0	0	0	0	0	0	0	0	0
f9223fe2ef8f1a26c00d797741fe8ac4	ASV5243	Bacteria	Proteobacteria	Gammaproteobacteria	Cellvibrionales	Halieaceae	OM60_NOR5__clade	NA	0	0	0	0	0	0	0	0	0	0	0	0	0	0	0	0	0	0	0	0	0	0	0	0	0	0	0	12	0	0	0	0	14	0	0	0	0	0	0	0	0
22e086005769ed8c136d3e0fb2fa481f	ASV1457	Bacteria	Proteobacteria	Gammaproteobacteria	Cellvibrionales	Halieaceae	Parahaliea	uncultured_bacterium	0	16	0	0	18	0	15	22	13	0	0	10	13	0	0	5	0	10	16	29	11	0	0	34	16	29	0	19	0	0	21	5	14	16	0	28	26	18	16	9	0
99cee8af60e2c46e610d9c8d6560c842	ASV2089	Bacteria	Proteobacteria	Gammaproteobacteria	Cellvibrionales	Halieaceae	Parahaliea	NA	36	0	14	17	0	23	0	0	0	0	0	0	0	0	0	0	27	0	0	35	0	17	0	0	29	0	0	0	0	0	0	0	0	0	0	0	0	31	0	0	0
b5269b1e6c30e397dbb2273918867fde	ASV3863	Bacteria	Proteobacteria	Gammaproteobacteria	Cellvibrionales	Halieaceae	Parahaliea	NA	0	0	0	0	19	0	0	0	0	0	0	0	0	0	16	16	0	25	25	0	0	0	0	32	0	0	0	0	0	0	26	0	0	0	12	33	25	0	0	0	16
3e2406073a6225e9b565c81325c43366	ASV509	Bacteria	Proteobacteria	Gammaproteobacteria	Cellvibrionales	Halieaceae	Parahaliea	uncultured_gamma	4	0	0	0	0	0	0	0	0	0	0	0	0	0	0	0	0	0	0	0	0	0	0	0	0	0	0	0	0	0	0	0	0	0	0	0	0	17	0	39	0
8c626445d49fb95528ac2306649e6ddc	ASV1128	Bacteria	Proteobacteria	Gammaproteobacteria	Cellvibrionales	Halieaceae	Parahaliea	uncultured_bacterium	19	0	0	0	0	0	0	0	0	0	0	0	0	0	0	0	0	22	0	0	0	0	0	0	0	0	0	0	0	0	0	0	0	0	0	0	0	0	0	0	0
5f61f7c7808d7a5d8419cb89ce78adf4	ASV792	Bacteria	Proteobacteria	Gammaproteobacteria	Cellvibrionales	Halieaceae	Parahaliea	uncultured_gamma	0	0	0	0	0	0	0	0	0	0	0	0	0	8	0	0	0	12	0	0	10	0	0	0	0	0	0	0	0	0	0	0	0	0	0	0	0	10	0	0	0
5ebddbde971233f656b86482bba22aa5	ASV777	Bacteria	Proteobacteria	Gammaproteobacteria	Cellvibrionales	Halieaceae	Parahaliea	uncultured_gamma	0	0	0	0	0	0	0	0	0	0	0	0	0	0	0	0	0	0	0	0	0	0	0	0	0	0	0	0	0	0	0	0	0	0	0	0	0	0	0	0	0
84bd172b45446f4d80aa17380c952324	ASV1946	Bacteria	Proteobacteria	Gammaproteobacteria	Cellvibrionales	Halieaceae	Parahaliea	NA	0	0	0	0	0	0	0	0	0	0	0	0	0	0	0	0	0	0	0	0	0	0	0	0	0	0	0	0	0	0	0	0	0	20	0	0	0	0	0	0	0
75fdf372b18923aa7f9e9b3102e2edad	ASV1871	Bacteria	Proteobacteria	Gammaproteobacteria	Cellvibrionales	Porticoccaceae	Porticoccus	uncultured_bacterium	0	0	0	0	0	0	426	535	629	164	435	397	255	170	933	2184	0	0	354	22	8	55	0	17	0	1169	559	286	317	203	24	398	477	720	2657	2565	562	216	887	208	89
e614c3b4938c5a65ca3f5b943eaae99a	ASV4887	Bacteria	Proteobacteria	Gammaproteobacteria	Cellvibrionales	Porticoccaceae	Porticoccus	uncultured_bacterium	38	35	39	31	85	35	0	0	0	0	0	27	21	37	40	46	105	67	46	110	34	47	50	73	62	0	0	0	0	0	32	0	0	0	30	41	75	51	0	44	39
99f3f48f6648a957ed928e8e7a3a0893	ASV2093	Bacteria	Proteobacteria	Gammaproteobacteria	Cellvibrionales	Porticoccaceae	Porticoccus	uncultured_bacterium	0	0	0	0	0	0	0	0	0	0	0	0	0	0	0	0	0	0	0	0	0	0	0	0	0	0	0	0	0	0	0	0	0	0	105	629	0	0	0	0	0
630e078a63b0486fae040d23bc4e0a6c	ASV2372	Bacteria	Proteobacteria	Gammaproteobacteria	Cellvibrionales	Porticoccaceae	Porticoccus	uncultured_bacterium	0	0	0	0	0	0	24	50	20	0	8	0	0	0	0	0	0	0	0	0	0	0	0	0	0	77	33	10	9	24	0	30	51	14	0	0	0	0	24	0	0
ebd0ac84facccb379f46464f48e06eb5	ASV4972	Bacteria	Proteobacteria	Gammaproteobacteria	Cellvibrionales	Porticoccaceae	Porticoccus	uncultured_bacterium	0	0	0	0	0	0	0	14	36	0	14	0	0	0	0	0	0	0	0	0	0	0	0	0	0	32	30	14	0	0	0	18	26	30	0	0	0	0	41	0	0
d59bc50f5f17ea0c011faff3f6af6f26	ASV4495	Bacteria	Proteobacteria	Gammaproteobacteria	Cellvibrionales	Porticoccaceae	Porticoccus	NA	0	0	0	0	0	0	0	0	0	0	0	0	0	0	83	113	0	0	0	0	0	0	0	0	0	0	0	0	0	0	0	0	0	0	0	0	0	0	0	0	0
65be3f6bda9f690d7bda5933a5e67c58	ASV1783	Bacteria	Proteobacteria	Gammaproteobacteria	Cellvibrionales	Halieaceae	Pseudohaliea	NA	0	0	0	56	55	0	0	0	0	0	0	0	0	0	0	0	0	0	72	0	0	54	0	0	0	0	0	345	152	0	72	0	0	0	0	0	0	262	0	0	0
a00df499ea4f4a3820f259169809df27	ASV3391	Bacteria	Proteobacteria	Gammaproteobacteria	Cellvibrionales	Halieaceae	Pseudohaliea	uncultured_organism	0	0	30	55	38	0	0	0	0	0	0	0	0	0	0	0	0	0	25	0	0	0	0	0	0	0	0	111	73	58	0	0	0	0	0	0	0	0	0	0	0
82524a7512cdce5eb138400498c2d579	ASV3018	Bacteria	Proteobacteria	Gammaproteobacteria	Cellvibrionales	Cellvibrionaceae	Pseudoteredinibacter	uncultured_bacterium	0	17	0	0	0	0	0	0	0	0	0	0	0	0	11	13	19	34	0	15	0	0	40	17	0	0	0	9	0	0	37	0	0	0	81	57	42	18	0	15	20
37bae8dc1b342ac841c6186f8efeee85	ASV1568	Bacteria	Proteobacteria	Gammaproteobacteria	Cellvibrionales	Cellvibrionaceae	Pseudoteredinibacter	NA	24	0	0	0	0	0	0	0	0	0	0	0	0	15	0	0	0	0	0	0	0	0	0	0	0	0	0	0	0	0	0	0	0	4	0	0	0	0	0	0	0
ae1a3c6a66ec9094c42724afd66f8ac1	ASV3657	Bacteria	Proteobacteria	Gammaproteobacteria	Cellvibrionales	Cellvibrionaceae	Simiduia	Simiduia_agarivorans	9	0	12	0	24	0	125	427	196	119	77	0	0	0	0	8	8	0	33	0	12	7	13	0	0	150	70	202	81	47	20	265	93	80	7	0	28	0	185	0	6
ced95a37e01871c5124b53b87155ad3d	ASV4373	Bacteria	Proteobacteria	Gammaproteobacteria	Cellvibrionales	Spongiibacteraceae	Sinobacterium	uncultured_bacterium	0	6	0	40	0	0	76	6	0	29	42	0	22	8	30	50	80	62	15	57	8	123	0	0	3	9	79	34	6	26	0	29	0	22	0	17	15	0	25	122	12
fbbe54355902722ba672ea1202647540	ASV5313	Bacteria	Proteobacteria	Gammaproteobacteria	Cellvibrionales	Spongiibacteraceae	Spongiibacter	NA	0	0	0	0	0	0	13	0	0	0	0	0	0	0	0	0	0	0	0	0	0	0	0	0	0	10	14	0	0	0	0	9	0	0	0	0	0	0	0	0	0
57bfdbcad5634a17334b1f18ef7f992e	ASV1713	Bacteria	Proteobacteria	Gammaproteobacteria	Cellvibrionales	Spongiibacteraceae	Spongiibacteraceae	uncultured_bacterium	134	30	41	25	24	38	0	0	40	0	33	39	37	11	71	65	41	145	30	21	122	25	111	137	45	41	0	0	0	33	91	64	0	63	84	104	237	109	0	66	126
541b0fa0e6c9f385c18839bebca5a4e1	ASV2327	Bacteria	Proteobacteria	Gammaproteobacteria	Cellvibrionales	Spongiibacteraceae	Spongiibacteraceae	uncultured_bacterium	17	0	0	9	10	0	0	0	0	0	0	0	0	14	61	21	51	34	10	62	24	30	10	11	0	0	0	0	0	0	0	0	0	0	0	27	34	37	0	17	17
8e9c502c7b75c29991b3d04171871e9a	ASV1165	Bacteria	Proteobacteria	Gammaproteobacteria	Cellvibrionales	Spongiibacteraceae	Spongiibacteraceae	uncultured_bacterium	0	0	0	0	0	0	0	24	13	12	18	0	0	0	0	0	0	0	0	0	0	0	0	0	0	17	0	0	20	0	0	16	21	0	0	0	0	0	0	0	0
0715979af961b109f6a076268637d6fb	ASV3161	Bacteria	Proteobacteria	Gammaproteobacteria	Cellvibrionales	Spongiibacteraceae	Spongiibacteraceae	uncultured_bacterium	0	0	0	0	0	0	0	51	0	0	0	0	0	0	0	0	0	0	0	0	0	0	0	0	0	0	48	0	0	0	0	0	0	0	0	0	0	0	0	0	0
b5a1177a3191079e1841f480a14775b7	ASV3728	Bacteria	Proteobacteria	Gammaproteobacteria	Cellvibrionales	Spongiibacteraceae	Spongiibacteraceae	uncultured_bacterium	0	0	0	0	0	0	0	0	0	0	0	0	0	0	0	0	0	0	0	0	0	0	0	0	0	0	0	0	0	0	0	0	0	0	0	0	0	0	20	0	0
c3738f272bde3fd7ec7de3a2f91564f3	ASV4216	Bacteria	Proteobacteria	Gammaproteobacteria	Cellvibrionales	Cellvibrionaceae	uncultured	uncultured_bacterium	560	259	533	376	619	432	120	143	85	49	102	206	136	182	284	872	386	634	203	407	1242	491	786	204	710	80	147	133	49	42	1159	145	85	108	308	591	1198	583	131	135	279
7756896d62161a1c59a9121525130475	ASV3254	Bacteria	Proteobacteria	Gammaproteobacteria	Cellvibrionales	Spongiibacteraceae	uncultured	uncultured_bacterium	250	22	41	65	39	0	0	0	42	22	97	31	0	33	48	111	87	316	25	114	74	45	88	144	86	33	83	0	19	0	56	36	0	49	54	201	194	0	0	95	149
b82386f956191066f5ffa2955dc79cd2	ASV3878	Bacteria	Proteobacteria	Gammaproteobacteria	Cellvibrionales	Cellvibrionaceae	uncultured	NA	0	0	0	0	0	0	20	12	11	0	0	0	0	130	77	277	0	0	0	0	0	0	0	0	0	14	0	0	0	0	0	11	20	13	105	314	5	0	19	0	0
a15079681fbb7fc7685686a48a1711be	ASV3570	Bacteria	Proteobacteria	Gammaproteobacteria	Cellvibrionales	Cellvibrionaceae	uncultured	uncultured_bacterium	43	0	35	12	12	18	20	53	27	0	26	0	0	0	9	19	34	110	21	15	17	0	33	26	23	17	0	10	16	0	16	53	34	32	8	47	99	22	27	0	19
a58f3a9947e2000f09cde537e768a070	ASV3481	Bacteria	Proteobacteria	Gammaproteobacteria	Cellvibrionales	Spongiibacteraceae	uncultured	uncultured_bacterium	0	0	0	0	33	23	0	0	0	0	0	0	38	0	0	43	0	70	0	0	0	0	0	74	0	0	0	14	0	27	0	0	0	0	0	0	70	49	0	0	44
ac9aad8967c300e2a3650ff2e63e5b57	ASV3624	Bacteria	Proteobacteria	Gammaproteobacteria	Cellvibrionales	Cellvibrionaceae	uncultured	uncultured_bacterium	0	9	0	0	0	0	12	33	15	4	0	0	10	0	11	0	0	10	0	0	0	11	0	34	0	0	0	13	0	0	0	0	0	74	0	0	0	68	0	23	15
9a9d559d46a2b4c467b66ecd53a74020	ASV1214	Bacteria	Proteobacteria	Gammaproteobacteria	Cellvibrionales	Cellvibrionaceae	uncultured	uncultured_bacterium	0	0	0	0	0	0	0	0	0	0	0	0	0	0	0	0	0	0	0	0	0	0	0	0	0	0	0	0	0	0	250	0	0	0	0	0	0	0	0	0	0
347c9dbd4a0697f50b843cb627ff0eca	ASV2223	Bacteria	Proteobacteria	Gammaproteobacteria	Cellvibrionales	Cellvibrionaceae	uncultured	NA	0	0	0	0	0	0	0	90	0	0	0	0	0	0	0	0	0	0	0	0	0	0	0	0	0	0	0	0	0	0	0	0	0	0	0	0	0	0	0	0	0
715908a32a20b00c7271905ec346cc8b	ASV3160	Bacteria	Proteobacteria	Gammaproteobacteria	Cellvibrionales	Spongiibacteraceae	uncultured	uncultured_bacterium	0	0	0	0	0	0	0	21	0	0	0	0	0	0	0	0	0	0	0	0	0	0	0	0	0	19	0	0	0	0	0	23	21	0	0	0	0	0	0	0	0
bba4fcea8c2508d78034ae339f0b225b	ASV3931	Bacteria	Proteobacteria	Gammaproteobacteria	Cellvibrionales	Spongiibacteraceae	uncultured	uncultured_bacterium	0	0	0	0	0	0	0	0	0	0	0	0	0	0	0	0	0	0	0	0	0	0	0	0	0	0	0	0	0	0	0	0	0	0	0	0	0	0	60	0	0
b21dff3e582f2f4688e3f4df80475558	ASV3780	Bacteria	Proteobacteria	Gammaproteobacteria	Cellvibrionales	Cellvibrionaceae	uncultured	uncultured_bacterium	0	0	0	0	0	0	0	0	0	0	0	0	0	0	0	0	0	0	0	14	15	0	0	0	0	0	0	0	0	0	14	0	0	0	0	0	16	0	0	0	0
d3be48aa223a163eaed272ae241df7d2	ASV4422	Bacteria	Proteobacteria	Gammaproteobacteria	Cellvibrionales	Cellvibrionaceae	uncultured	uncultured_bacterium	0	10	0	0	0	0	0	0	0	0	0	0	0	0	0	0	0	0	0	0	0	0	0	39	0	0	0	0	0	0	0	0	0	0	0	0	0	0	0	0	0
bd462ae71ccb0f1177c4c5d3aead3e22	ASV3964	Bacteria	Proteobacteria	Gammaproteobacteria	Cellvibrionales	Cellvibrionaceae	uncultured	uncultured_gamma	0	0	0	0	0	0	0	0	0	0	0	0	0	0	0	0	12	8	0	0	0	0	0	0	0	0	15	0	0	0	0	0	0	0	13	0	0	0	0	0	0
30671257b5a3015d87e2250844686cc8	ASV3289	Bacteria	Proteobacteria	Gammaproteobacteria	Cellvibrionales	Cellvibrionaceae	uncultured	uncultured_bacterium	0	0	0	0	0	0	0	0	0	0	0	0	0	0	8	16	0	0	0	0	0	0	0	0	0	0	0	0	0	0	0	0	0	0	0	0	0	0	0	18	0
d5c3ae56ad6893325c5920b5c9c297be	ASV4442	Bacteria	Proteobacteria	Gammaproteobacteria	Cellvibrionales	Spongiibacteraceae	uncultured	uncultured_bacterium	0	0	0	0	0	0	0	0	0	0	0	0	0	0	0	0	0	0	0	0	0	0	0	0	0	0	33	0	0	0	0	0	0	0	0	0	0	0	0	0	0
89f77b03dac5d55e4321a5534632ebd8	ASV2000	Bacteria	Proteobacteria	Gammaproteobacteria	Cellvibrionales	Spongiibacteraceae	uncultured	uncultured_bacterium	0	0	0	0	0	0	32	0	0	0	0	0	0	0	0	0	0	0	0	0	0	0	0	0	0	0	0	0	0	0	0	0	0	0	0	0	0	0	0	0	0
6413bbfc62fc193a9a5d660135374e05	ASV2736	Bacteria	Proteobacteria	Gammaproteobacteria	Cellvibrionales	Spongiibacteraceae	uncultured	uncultured_bacterium	0	0	0	0	0	0	0	0	0	0	0	0	0	0	0	0	0	0	0	0	0	0	0	0	0	0	0	0	0	0	0	0	0	0	0	0	0	0	28	0	0
e04364f2403874f1f05689088c154550	ASV4908	Bacteria	Proteobacteria	Gammaproteobacteria	Cellvibrionales	Cellvibrionaceae	uncultured	NA	0	0	0	0	0	0	0	0	0	0	0	0	0	0	0	0	0	0	0	0	0	0	0	0	0	0	0	0	0	0	24	0	0	0	0	0	0	0	0	0	0
c64a7fb6c0630874d50355ccabc26a78	ASV4149	Bacteria	Proteobacteria	Gammaproteobacteria	CH2b56	CH2b56	CH2b56	NA	0	0	0	0	0	0	218	204	237	0	0	43	67	0	0	0	0	0	24	0	0	0	0	0	0	138	0	155	69	17	9	93	75	40	0	0	0	0	142	0	0
e6a432985b411ed0a0533f831dba05c4	ASV4785	Bacteria	Proteobacteria	Gammaproteobacteria	CH2b56	CH2b56	CH2b56	NA	0	0	0	0	0	0	0	0	0	0	0	0	0	0	0	0	0	0	0	0	0	0	34	0	0	0	0	0	0	0	0	0	0	0	0	0	0	0	0	0	0
d2c010425096b7137145a1a6f4c30d7e	ASV4412	Bacteria	Proteobacteria	Gammaproteobacteria	CHAB-XI-27	CHAB-XI-27	CHAB-XI-27	NA	0	0	35	0	0	0	0	0	0	0	0	0	0	0	0	0	0	0	0	0	0	0	0	0	0	0	0	0	0	0	0	0	0	0	0	0	0	0	0	0	0
fdb02e30370383501f481b5fbda0c32e	ASV5348	Bacteria	Fibrobacterota	Chitinivibrionia	Chitinivibrionales	Chitinivibrionaceae	possible_genus_03	uncultured_bacterium	0	0	0	0	18	8	0	0	0	0	0	0	0	15	0	0	0	0	6	0	0	16	0	0	0	0	0	0	0	0	0	0	0	0	0	0	0	0	0	0	0
5c9eefbcd3f3a8edd08eca76d937cbea	ASV720	Bacteria	Fibrobacterota	Chitinivibrionia	Chitinivibrionales	Chitinivibrionaceae	possible_genus_03	uncultured_bacterium	0	0	0	0	0	6	0	0	0	0	0	0	0	0	0	0	0	0	0	0	0	0	0	0	0	0	0	0	0	0	0	0	0	0	30	0	0	0	0	0	0
5ac11254fac35235ee0c2af31aacb844	ASV687	Bacteria	Fibrobacterota	Chitinivibrionia	Chitinivibrionales	Chitinivibrionaceae	possible_genus_03	uncultured_bacterium	0	0	0	0	0	0	0	0	0	0	0	0	0	0	0	0	0	0	0	0	0	0	0	0	0	0	0	0	0	0	0	0	0	0	25	0	0	0	0	0	0
0d58183e4c1ef47e0b74d3d7befd5fd5	ASV68	Bacteria	Bacteroidota	Bacteroidia	Chitinophagales	Saprospiraceae	Aureispira	uncultured_bacterium	8	6	8	7	0	12	0	0	2	0	6	0	7	0	0	8	11	6	0	0	0	0	6	13	5	0	0	0	0	0	12	0	0	0	11	14	0	0	0	2	5
361e7d9a31c2d0a61aa78a861b5018dd	ASV2235	Bacteria	Bacteroidota	Bacteroidia	Chitinophagales	Chitinophagaceae	Edaphobaculum	uncultured_marine	35	9	0	12	38	18	0	6	10	0	0	21	8	10	39	23	14	29	0	0	0	36	6	6	21	27	0	6	0	0	25	0	6	0	109	61	21	0	4	0	5
79200137da4f0ca1d28d70928ad1285c	ASV3314	Bacteria	Bacteroidota	Bacteroidia	Chitinophagales	Saprospiraceae	Lewinella	uncultured_organism	0	86	316	52	43	204	0	22	18	0	13	291	30	54	76	0	10	17	8	0	21	10	78	19	0	30	0	0	60	272	27	18	0	255	11	0	0	40	16	30	7
423ad36c6f292f056703e4c00aea4f6c	ASV2269	Bacteria	Bacteroidota	Bacteroidia	Chitinophagales	Saprospiraceae	Lewinella	uncultured_organism	8	22	40	0	20	51	58	153	46	9	41	17	0	14	19	0	0	0	42	0	24	0	19	0	0	168	0	255	179	42	11	23	175	0	0	0	0	17	80	10	0
44d89329bf8fedea3202c742b525926a	ASV1620	Bacteria	Bacteroidota	Bacteroidia	Chitinophagales	Saprospiraceae	Lewinella	uncultured_Sphingobacterium	18	60	911	0	0	33	0	0	0	0	0	244	0	101	16	0	0	34	0	0	0	11	57	0	0	0	0	0	0	0	0	0	0	0	36	0	0	28	0	15	0
87b35d26396edcedfd6df84853bc1108	ASV1973	Bacteria	Bacteroidota	Bacteroidia	Chitinophagales	Saprospiraceae	Lewinella	Lewinella_sp.	0	0	37	22	76	79	15	84	0	0	41	71	92	165	8	5	10	9	15	0	24	0	15	29	0	387	0	43	68	29	31	9	102	10	0	14	0	11	23	0	4
08ed8539c7b5d3384b03de90fe45eb2f	ASV1184	Bacteria	Bacteroidota	Bacteroidia	Chitinophagales	Saprospiraceae	Lewinella	uncultured_bacterium	19	145	160	26	27	44	89	24	0	0	21	28	100	48	30	38	0	41	30	49	0	26	27	0	30	81	0	46	31	0	91	17	0	0	0	0	0	49	55	0	31
2d3bff1c7cbdfa2fcf526fd74a3c7ad5	ASV341	Bacteria	Bacteroidota	Bacteroidia	Chitinophagales	Saprospiraceae	Lewinella	NA	0	0	26	21	16	30	0	47	17	0	0	0	28	44	44	17	0	25	0	15	19	30	21	34	14	80	10	56	42	0	6	15	53	10	24	17	0	39	15	18	6
c283123a24eaa633ef02eef6035babd4	ASV4248	Bacteria	Bacteroidota	Bacteroidia	Chitinophagales	Saprospiraceae	Lewinella	uncultured_bacterium	57	0	57	12	53	44	0	39	6	0	0	38	28	29	0	15	22	21	0	35	17	24	57	19	14	22	0	12	17	0	49	0	14	28	5	13	35	17	0	38	15
53d76bd348a2a81e3692c5467afa3d58	ASV1685	Bacteria	Bacteroidota	Bacteroidia	Chitinophagales	Saprospiraceae	Lewinella	Cladosiphon_okamuranus	0	0	33	0	33	27	10	15	0	6	0	39	58	0	0	0	18	0	0	0	22	0	0	120	0	34	0	0	0	0	16	0	13	0	17	9	13	0	0	0	0
33930cc3b5cb8224292852e9c90298b6	ASV2923	Bacteria	Bacteroidota	Bacteroidia	Chitinophagales	Saprospiraceae	Lewinella	uncultured_Bacteroidetes	10	6	26	0	0	19	0	0	0	0	0	23	11	0	6	15	15	14	0	21	0	0	18	27	11	7	0	0	0	0	9	0	0	11	8	21	41	14	0	12	17
7a8bfe804fc4584533643c290d1bb3bf	ASV935	Bacteria	Bacteroidota	Bacteroidia	Chitinophagales	Saprospiraceae	Lewinella	NA	0	0	12	0	0	14	0	60	0	0	0	12	0	13	0	0	0	0	20	0	0	18	0	0	0	0	0	110	32	0	0	0	0	0	0	0	0	0	0	0	0
70069b9972c6df09d9491b7f7febf318	ASV2999	Bacteria	Bacteroidota	Bacteroidia	Chitinophagales	Saprospiraceae	Lewinella	NA	0	0	0	0	0	0	37	0	0	10	0	0	0	0	0	0	0	36	0	0	0	0	0	0	0	0	0	100	79	0	0	0	0	0	0	0	0	33	0	0	0
b286eec554313b8c9edffc215311dcf4	ASV3827	Bacteria	Bacteroidota	Bacteroidia	Chitinophagales	Saprospiraceae	Lewinella	uncultured_Bacteroidetes	0	21	22	0	0	0	0	0	0	0	17	15	0	0	0	0	19	0	0	15	0	16	0	29	0	0	0	0	19	0	0	0	0	0	22	0	0	11	0	0	0
1790358b6700f5b7741fce633c11d91e	ASV3208	Bacteria	Bacteroidota	Bacteroidia	Chitinophagales	Saprospiraceae	Lewinella	uncultured_Bacteroidetes	0	0	0	0	0	0	16	0	0	0	0	0	0	0	0	0	0	0	0	0	0	0	0	52	0	37	0	39	32	0	0	0	0	0	0	0	13	8	0	0	0
85b1a72080c6ded5e6b72eae2ed9df23	ASV1953	Bacteria	Bacteroidota	Bacteroidia	Chitinophagales	Saprospiraceae	Lewinella	Lewinella_nigricans	0	0	12	0	0	0	18	18	25	0	0	0	0	0	0	0	11	0	0	0	0	0	0	0	0	30	0	13	0	0	0	22	14	0	0	0	0	0	0	0	0
d19542cecff9a64686629dbf4dd557cb	ASV4549	Bacteria	Bacteroidota	Bacteroidia	Chitinophagales	Saprospiraceae	Lewinella	uncultured_bacterium	0	6	0	0	0	0	0	0	0	0	0	8	17	0	0	0	10	0	0	6	9	10	0	26	7	0	0	0	0	0	19	0	0	0	0	11	0	0	0	10	0
95022eb498e8a370a3bc89a89001fdd0	ASV3044	Bacteria	Bacteroidota	Bacteroidia	Chitinophagales	Saprospiraceae	Lewinella	NA	0	0	0	0	0	0	12	76	0	0	0	0	0	0	0	0	0	0	0	0	0	0	0	0	0	0	7	16	0	0	0	12	0	0	0	0	0	0	0	0	0
0a8eb24772843a4cc9ebf43f59bf46b9	ASV3	Bacteria	Bacteroidota	Bacteroidia	Chitinophagales	Saprospiraceae	Lewinella	uncultured_bacterium	0	0	10	13	0	0	0	17	0	0	0	0	13	0	0	0	0	0	5	0	0	0	0	0	3	11	0	0	0	0	6	0	0	0	0	0	0	0	9	11	5
44af30c929559874f0ac4fc6747b4c42	ASV1616	Bacteria	Bacteroidota	Bacteroidia	Chitinophagales	Saprospiraceae	Lewinella	uncultured_Bacteroidetes	0	0	0	0	0	0	0	0	0	0	0	0	14	0	17	13	0	23	0	14	11	0	0	8	0	0	0	0	0	0	16	0	0	0	0	0	0	0	0	0	0
e5c3d66589ca18091d2c386d9d0c7f23	ASV4776	Bacteria	Bacteroidota	Bacteroidia	Chitinophagales	Saprospiraceae	Lewinella	uncultured_bacterium	0	0	0	0	0	0	0	0	0	0	0	0	0	0	0	0	6	0	0	5	0	0	19	8	0	0	0	0	0	0	0	0	0	0	70	5	0	0	0	0	3
4d24d6766047e30503f3710bc1504189	ASV605	Bacteria	Bacteroidota	Bacteroidia	Chitinophagales	Saprospiraceae	Lewinella	uncultured_marine	0	0	0	13	0	0	0	0	0	0	11	0	0	0	0	0	0	0	0	0	0	0	0	16	0	0	0	12	0	0	0	0	0	0	0	0	0	0	0	0	24
54d612755caee980465d6e673cfe5275	ASV1694	Bacteria	Bacteroidota	Bacteroidia	Chitinophagales	Saprospiraceae	Lewinella	NA	0	0	0	0	0	0	0	72	0	0	0	0	0	0	0	0	0	0	0	0	0	0	0	0	0	0	0	0	0	0	0	0	0	0	0	0	0	0	0	0	0
76dd8200b576968590fcb586f296fa09	ASV1878	Bacteria	Bacteroidota	Bacteroidia	Chitinophagales	Saprospiraceae	Lewinella	uncultured_marine	0	0	0	0	0	0	0	0	0	0	0	0	0	0	0	0	0	0	0	0	0	0	0	0	0	0	0	0	70	0	0	0	0	0	0	0	0	0	0	0	0
cf253fb2b939355b18282fd955faaf74	ASV4383	Bacteria	Bacteroidota	Bacteroidia	Chitinophagales	Saprospiraceae	Lewinella	uncultured_bacterium	0	0	0	0	0	0	0	0	0	0	0	0	0	0	0	0	0	0	0	0	0	0	0	0	0	48	0	0	0	0	0	0	0	0	0	0	0	0	0	0	0
c94a7172a02dca049ff3b7bd83ec2984	ASV4166	Bacteria	Bacteroidota	Bacteroidia	Chitinophagales	Saprospiraceae	Lewinella	uncultured_bacterium	0	0	0	0	0	0	0	0	0	0	0	0	0	0	0	0	0	0	0	0	0	0	0	0	0	0	0	0	0	0	0	0	0	47	0	0	0	0	0	0	0
ec0c2e34a00af43aa15637f736da805b	ASV4978	Bacteria	Bacteroidota	Bacteroidia	Chitinophagales	Saprospiraceae	Lewinella	uncultured_bacterium	0	0	0	0	0	0	0	0	0	0	0	0	0	0	0	0	0	0	0	0	22	0	0	0	0	0	0	0	0	0	0	0	0	0	19	0	0	0	0	0	0
6c6a192460f6a2523d0cec40aaa504f5	ASV849	Bacteria	Bacteroidota	Bacteroidia	Chitinophagales	Saprospiraceae	Lewinella	uncultured_Bacteroidetes	0	0	0	0	5	0	0	0	0	0	0	0	0	7	0	0	0	0	0	0	0	0	12	14	0	0	0	0	0	0	0	0	0	0	0	0	0	0	0	0	0
0ca8fbd04e779aefe930cef1d94971fb	ASV55	Bacteria	Bacteroidota	Bacteroidia	Chitinophagales	Saprospiraceae	Lewinella	uncultured_Bacteroidetes	0	0	0	0	0	0	0	0	18	0	0	0	0	0	0	0	0	0	0	0	0	0	0	0	0	0	0	0	0	0	0	0	0	0	0	0	0	0	18	0	0
aae0c73d64c769bdd49d35901b7ba7e2	ASV3592	Bacteria	Bacteroidota	Bacteroidia	Chitinophagales	Saprospiraceae	Lewinella	uncultured_bacterium	0	0	0	0	0	0	0	0	0	0	0	0	0	0	0	0	0	0	13	0	0	0	0	0	0	0	0	0	0	0	0	0	0	0	0	0	0	0	21	0	0
f4e9983ca8bc22420c43c1e53f73531f	ASV5111	Bacteria	Bacteroidota	Bacteroidia	Chitinophagales	Saprospiraceae	Lewinella	Lewinella_nigricans	0	0	0	0	0	0	0	0	0	0	0	0	0	0	0	0	0	0	0	0	0	0	0	0	0	14	11	0	0	0	0	0	0	0	6	0	0	0	0	0	0
fb341628b4e9be958482ac25ea6c84bb	ASV5311	Bacteria	Bacteroidota	Bacteroidia	Chitinophagales	Saprospiraceae	Lewinella	uncultured_bacterium	0	0	0	0	0	0	0	23	0	0	0	0	0	0	0	0	0	0	0	0	0	0	0	0	0	0	0	0	0	0	0	0	0	0	0	0	0	0	0	0	0
9a53f10b5696756c1e17a24117d91f36	ASV1216	Bacteria	Bacteroidota	Bacteroidia	Chitinophagales	Saprospiraceae	NA	NA	0	27	55	57	23	33	128	13	35	20	36	26	81	50	77	26	41	46	11	0	18	0	54	0	0	45	11	71	15	34	9	34	107	56	36	89	0	61	23	8	45
c1b0a7884b4d0822df464d001ee39842	ASV4037	Bacteria	Bacteroidota	Bacteroidia	Chitinophagales	Saprospiraceae	NA	NA	23	32	83	25	38	29	31	61	62	10	25	88	53	64	19	24	38	40	17	26	24	48	41	33	11	65	26	47	31	27	43	34	38	25	35	0	0	40	55	0	0
86359168964473849a284ff2e3f98d38	ASV3381	Bacteria	Bacteroidota	Bacteroidia	Chitinophagales	Saprospiraceae	NA	NA	28	29	37	33	31	52	0	109	64	0	24	130	18	27	11	0	6	15	0	11	12	0	19	73	0	82	0	54	63	104	23	0	62	42	11	0	0	7	51	12	0
57e19bdfa7642e24a80f83bb7101cbb6	ASV1715	Bacteria	Bacteroidota	Bacteroidia	Chitinophagales	Saprospiraceae	NA	NA	0	0	0	0	0	0	27	45	20	25	47	35	35	0	0	0	0	0	6	0	0	0	0	0	0	39	22	292	374	0	0	0	0	44	0	0	0	0	39	0	0
88ecf7f2094d838ca057f1f6a8eb9dca	ASV1991	Bacteria	Bacteroidota	Bacteroidia	Chitinophagales	Saprospiraceae	NA	NA	32	44	23	0	0	64	24	19	0	22	27	0	26	10	49	10	0	46	0	0	50	17	19	155	6	90	15	16	0	47	13	24	53	21	0	0	0	0	0	17	0
a05d76734a2eeefd9457936dcad56b7f	ASV3424	Bacteria	Bacteroidota	Bacteroidia	Chitinophagales	Saprospiraceae	NA	NA	0	26	0	0	0	0	0	51	0	0	0	0	0	0	0	0	3	0	3	0	6	7	0	0	0	0	0	0	0	408	0	0	0	0	95	0	0	0	23	0	0
efd1e8d866dbda15b1c7e002d406f1c0	ASV5073	Bacteria	Bacteroidota	Bacteroidia	Chitinophagales	Saprospiraceae	NA	NA	0	0	0	21	40	35	45	0	37	0	0	39	35	38	22	0	0	0	26	11	0	0	28	0	0	28	14	26	31	0	0	0	0	33	0	0	32	0	32	0	0
6ced03d3223cad587ea4e5b2d585c0c4	ASV867	Bacteria	Bacteroidota	Bacteroidia	Chitinophagales	Saprospiraceae	NA	NA	0	0	35	8	0	0	0	24	0	0	0	0	17	0	0	0	0	27	11	22	18	26	20	0	0	9	0	0	0	0	0	15	0	16	0	12	18	18	14	0	0
7aa105fa5a0f78d9ead639464f4fef92	ASV951	Bacteria	Bacteroidota	Bacteroidia	Chitinophagales	Saprospiraceae	NA	NA	14	24	0	3	0	0	16	0	8	5	11	0	0	19	5	0	0	10	0	0	15	0	0	32	0	10	23	0	13	0	20	0	0	8	0	0	9	0	0	17	13
41558b429bcc6df5e08099fd62fb00bb	ASV2938	Bacteria	Bacteroidota	Bacteroidia	Chitinophagales	Saprospiraceae	NA	NA	10	0	8	0	0	9	9	0	0	16	14	0	0	0	26	12	11	22	11	0	19	7	0	0	0	0	0	0	0	0	11	0	11	0	0	9	16	13	0	6	20
32a5ebf0d4fec783b6956e4f7c50aeaf	ASV1529	Bacteria	Bacteroidota	Bacteroidia	Chitinophagales	Saprospiraceae	NA	NA	0	0	8	0	0	0	0	8	28	0	0	0	0	0	0	0	0	0	11	0	0	0	0	0	0	0	0	0	0	178	0	0	0	0	0	0	0	0	0	0	0
704a95825b6b0d0d97f80a85700ea71c	ASV2417	Bacteria	Bacteroidota	Bacteroidia	Chitinophagales	Saprospiraceae	NA	NA	0	21	0	0	0	0	0	0	0	0	0	0	0	0	25	26	0	0	25	0	0	0	0	0	0	0	0	0	0	0	0	0	0	0	0	0	22	0	0	30	24
0a0fa49aa2a5a7585832458ece7e4a27	ASV1	Bacteria	Bacteroidota	Bacteroidia	Chitinophagales	Saprospiraceae	NA	NA	0	0	0	0	0	0	0	0	0	0	0	0	75	0	0	34	0	0	0	0	0	0	0	0	0	0	0	0	0	0	0	0	0	0	0	0	0	0	0	0	0
b2517f62d9bce05e2641cbb29ee444c6	ASV3855	Bacteria	Bacteroidota	Bacteroidia	Chitinophagales	Saprospiraceae	NA	NA	0	0	0	0	0	0	33	0	0	19	0	0	0	0	0	0	0	0	7	0	0	0	0	0	0	10	0	17	0	0	0	0	9	14	0	0	0	0	0	0	0
068b1a394fa8d26643e87398f064765d	ASV1805	Bacteria	Bacteroidota	Bacteroidia	Chitinophagales	Saprospiraceae	NA	NA	0	0	0	0	0	0	0	0	0	0	0	0	0	0	0	0	0	0	0	0	0	0	0	0	0	0	0	0	0	103	0	0	0	0	0	0	0	0	0	0	0
773645903d606192f11e5fb016914d76	ASV3335	Bacteria	Bacteroidota	Bacteroidia	Chitinophagales	Saprospiraceae	NA	NA	0	0	0	0	0	0	8	0	13	0	0	0	0	10	0	0	12	0	0	0	0	0	0	0	0	9	0	0	0	0	0	0	0	0	0	22	15	0	0	0	0
57889dc079c7d44e7d1de34e2fa650e7	ASV2978	Bacteria	Bacteroidota	Bacteroidia	Chitinophagales	Saprospiraceae	NA	NA	0	0	0	0	0	0	40	0	0	0	0	0	0	0	0	0	0	0	18	0	0	0	0	0	0	0	30	0	0	0	0	0	0	0	0	0	0	0	0	0	0
f1eac99b97114e7933c238aa34eb5f5c	ASV5087	Bacteria	Bacteroidota	Bacteroidia	Chitinophagales	Saprospiraceae	NA	NA	0	0	0	0	0	0	0	0	0	0	0	6	0	5	10	7	8	14	0	0	0	0	0	6	6	0	0	0	0	0	0	0	0	0	0	0	14	0	0	0	0
356ea868454bc66bd07681a02ecc19d0	ASV2233	Bacteria	Bacteroidota	Bacteroidia	Chitinophagales	Saprospiraceae	NA	NA	0	0	0	0	0	0	0	0	0	0	0	0	0	0	0	0	0	0	0	0	0	0	0	0	0	0	0	0	78	0	0	0	0	0	0	0	0	0	0	0	0
7abda431e0b1f4f2c11afb252ac3f8ec	ASV956	Bacteria	Bacteroidota	Bacteroidia	Chitinophagales	Saprospiraceae	NA	NA	0	0	0	0	0	0	9	22	10	0	0	0	0	0	0	0	0	0	0	0	0	0	0	0	0	0	0	30	0	0	0	0	0	0	0	0	0	0	0	0	0
fd80a4a07c61972d84710cef33ffb0eb	ASV5343	Bacteria	Bacteroidota	Bacteroidia	Chitinophagales	Saprospiraceae	NA	NA	0	16	0	0	0	0	0	0	0	0	0	0	0	0	0	0	0	0	0	22	0	0	0	25	8	0	0	0	0	0	0	0	0	0	0	0	0	0	0	0	0
934cb9f6a3a5f405e5c422c0f9daa263	ASV2527	Bacteria	Bacteroidota	Bacteroidia	Chitinophagales	Saprospiraceae	NA	NA	0	0	40	0	0	0	0	0	0	0	0	0	0	0	0	0	0	0	0	0	0	0	0	0	0	0	0	0	0	0	0	0	0	0	0	18	0	0	0	0	0
cdb5ce83789dee47e0f10e583693dab3	ASV4342	Bacteria	Bacteroidota	Bacteroidia	Chitinophagales	Saprospiraceae	NA	NA	0	0	0	0	0	0	0	0	0	0	0	0	0	0	0	0	0	0	0	18	0	31	0	0	0	0	0	0	0	0	0	0	0	0	0	0	0	0	0	0	0
01add9d11d41a71cf8063e74e6e35cff	ASV149	Bacteria	Bacteroidota	Bacteroidia	Chitinophagales	Saprospiraceae	NA	NA	0	32	0	0	0	0	0	0	0	0	0	0	0	0	0	0	0	0	0	0	0	0	0	0	0	0	0	0	0	0	15	0	0	0	0	0	0	0	0	0	0
95976383295df1b6d7926dc7c5781a85	ASV3369	Bacteria	Bacteroidota	Bacteroidia	Chitinophagales	Saprospiraceae	NA	NA	0	7	0	9	0	0	0	0	0	0	0	0	0	0	0	0	0	0	0	0	12	0	0	0	0	0	0	0	0	0	0	0	0	0	0	7	0	10	0	0	0
b2625f5813e23e5b07255a900a1cd58e	ASV3857	Bacteria	Bacteroidota	Bacteroidia	Chitinophagales	Saprospiraceae	NA	NA	0	0	0	0	0	0	0	0	0	0	0	0	0	0	0	0	0	0	0	0	0	0	0	0	0	0	0	0	0	0	42	0	0	0	0	0	0	0	0	0	0
039c2caebba96818d6f3482f40768a4d	ASV1579	Bacteria	Bacteroidota	Bacteroidia	Chitinophagales	Saprospiraceae	NA	NA	0	0	0	12	0	11	0	0	0	0	0	14	0	0	0	0	0	0	0	0	0	0	0	0	0	0	0	0	0	0	0	0	0	0	0	0	0	0	0	0	0
0b7a8261e83e4bf103a7c10009c99aa9	ASV29	Bacteria	Bacteroidota	Bacteroidia	Chitinophagales	Saprospiraceae	NA	NA	0	0	0	0	0	0	0	0	14	0	0	0	0	0	0	0	0	0	0	23	0	0	0	0	0	0	0	0	0	0	0	0	0	0	0	0	0	0	0	0	0
35401e81b37854331e5d28f5bdc8cf24	ASV2927	Bacteria	Bacteroidota	Bacteroidia	Chitinophagales	NA	NA	NA	0	0	0	0	12	9	0	0	0	0	0	0	0	0	0	0	0	8	0	0	0	0	0	0	0	0	0	0	0	0	0	0	0	0	0	0	0	0	0	0	0
42099683969ea8e3e63afbdd07f61037	ASV3364	Bacteria	Bacteroidota	Bacteroidia	Chitinophagales	Saprospiraceae	NA	NA	0	0	0	0	0	0	0	0	0	0	0	0	0	0	0	0	0	30	0	0	0	0	0	0	0	0	0	0	0	0	0	0	0	0	0	0	0	0	0	0	0
564b55e9aeae1b63220879ca6b0a134c	ASV2339	Bacteria	Bacteroidota	Bacteroidia	Chitinophagales	Saprospiraceae	NA	NA	0	0	0	0	0	0	0	0	0	0	0	0	0	0	0	0	0	0	0	0	0	0	0	0	0	27	0	0	0	0	0	0	0	0	0	0	0	0	0	0	0
0ac69111de96cfac3dfd34080ea71c05	ASV19	Bacteria	Bacteroidota	Bacteroidia	Chitinophagales	Saprospiraceae	NA	NA	0	0	0	0	0	0	0	0	0	0	0	0	0	0	0	0	0	0	0	0	0	0	0	0	0	0	0	0	0	0	0	0	16	0	0	0	0	0	9	0	0
22f5a4c853e84beb6ec0ec6a9bc925ae	ASV1459	Bacteria	Bacteroidota	Bacteroidia	Chitinophagales	Saprospiraceae	NA	NA	0	0	0	0	0	0	0	0	0	0	0	0	0	0	0	0	0	0	0	0	0	0	0	0	0	17	0	0	0	0	0	0	0	7	0	0	0	0	0	0	0
4ba1fbf1d3a17008170f88457d8629e7	ASV570	Bacteria	Bacteroidota	Bacteroidia	Chitinophagales	Saprospiraceae	NA	NA	0	0	0	0	0	0	0	0	0	0	0	0	0	0	0	0	0	0	0	14	0	0	0	0	0	0	0	0	0	0	0	0	0	0	0	0	0	9	0	0	0
fae3199d6a310ece8c2aa06e8f132864	ASV5295	Bacteria	Bacteroidota	Bacteroidia	Chitinophagales	Saprospiraceae	NA	NA	0	0	0	0	0	0	0	0	0	0	0	0	0	0	0	0	0	0	0	0	0	0	0	0	0	0	0	9	14	0	0	0	0	0	0	0	0	0	0	0	0
3ea68b5f3245c2e92df10bb81a8cc0f9	ASV511	Bacteria	Bacteroidota	Bacteroidia	Chitinophagales	Saprospiraceae	Phaeodactylibacter	NA	151	217	321	229	92	142	115	126	158	90	99	140	128	122	125	70	92	160	42	109	203	69	94	161	37	195	68	192	66	194	133	45	85	115	58	85	77	176	199	40	82
7da724ab18baf68e9b53169ef83793e0	ASV1014	Bacteria	Bacteroidota	Bacteroidia	Chitinophagales	Saprospiraceae	Phaeodactylibacter	uncultured_Bacteroidetes	12	13	169	23	33	63	17	14	19	0	6	86	40	66	18	3	8	0	9	17	23	35	41	21	7	45	0	13	84	0	39	0	0	24	13	0	0	13	64	14	0
d4a410a47f00756eae54da388e5bcc04	ASV4430	Bacteria	Bacteroidota	Bacteroidia	Chitinophagales	Saprospiraceae	Phaeodactylibacter	uncultured_bacterium	43	26	0	0	0	0	0	0	0	0	0	0	0	0	9	10	6	26	0	0	0	0	9	20	30	0	0	0	0	0	0	0	0	0	42	37	33	12	0	0	7
673f580c56ecafcfec383e1116608737	ASV2393	Bacteria	Bacteroidota	Bacteroidia	Chitinophagales	Saprospiraceae	Phaeodactylibacter	NA	0	0	0	0	0	0	0	60	0	0	0	0	0	0	0	0	0	0	0	0	0	0	0	0	0	44	0	0	0	162	0	0	0	0	0	0	0	0	0	0	0
250f678ffc3e8fa5b259df55cdd3cdf3	ASV2165	Bacteria	Bacteroidota	Bacteroidia	Chitinophagales	Saprospiraceae	Phaeodactylibacter	NA	19	0	0	11	0	0	0	6	0	7	0	0	0	0	0	12	0	23	0	0	0	0	0	0	0	31	0	33	22	0	0	0	12	9	13	0	0	0	0	0	0
b6a868c980cb9445e077c7267571eae9	ASV3735	Bacteria	Bacteroidota	Bacteroidia	Chitinophagales	Saprospiraceae	Phaeodactylibacter	uncultured_bacterium	0	0	9	0	0	0	0	0	81	0	13	0	0	0	0	0	0	0	5	0	0	0	0	0	0	11	0	0	5	0	0	0	0	15	0	0	0	0	0	0	0
c549e9296ee33458bb970882fecdaa2e	ASV4196	Bacteria	Bacteroidota	Bacteroidia	Chitinophagales	Saprospiraceae	Phaeodactylibacter	NA	0	0	0	0	0	0	0	0	0	0	24	19	0	0	0	0	0	0	0	0	0	0	0	0	0	0	26	0	36	0	0	0	0	0	0	0	0	0	0	0	0
bbe9ae5c086a0762a60d975258e8d38b	ASV3934	Bacteria	Bacteroidota	Bacteroidia	Chitinophagales	Saprospiraceae	Phaeodactylibacter	NA	0	0	0	0	0	0	0	0	18	0	18	0	0	0	0	0	0	0	0	0	0	0	0	0	0	13	0	0	21	0	0	0	0	13	0	0	0	0	18	0	0
1d660eb46d1f2c643dc9beefa61ec532	ASV207	Bacteria	Bacteroidota	Bacteroidia	Chitinophagales	Saprospiraceae	Phaeodactylibacter	uncultured_bacterium	0	19	0	16	0	0	0	0	0	0	0	0	20	0	0	0	0	34	0	0	0	0	0	0	0	0	0	0	0	0	0	0	0	0	0	0	0	0	0	0	0
86b3ff2bdc68e4a39a2f3db5fc874a19	ASV1962	Bacteria	Bacteroidota	Bacteroidia	Chitinophagales	Saprospiraceae	Phaeodactylibacter	uncultured_bacterium	0	0	0	0	0	0	7	0	13	0	0	0	0	0	0	0	0	0	0	0	0	0	0	0	0	19	9	0	0	0	0	0	33	0	0	0	0	0	0	0	0
f98234de47879ab5421da57d20a92197	ASV5252	Bacteria	Bacteroidota	Bacteroidia	Chitinophagales	Saprospiraceae	Phaeodactylibacter	NA	0	0	14	0	0	0	0	0	0	0	0	0	0	13	0	0	0	0	0	0	0	0	0	15	0	0	0	0	0	0	7	0	0	0	0	0	0	0	0	0	0
f3aa8913ccbefb99e100b9fdca47fb58	ASV5099	Bacteria	Bacteroidota	Bacteroidia	Chitinophagales	Saprospiraceae	Phaeodactylibacter	uncultured_bacterium	0	0	0	0	0	0	0	0	0	0	0	0	0	0	0	0	0	0	0	0	0	0	0	0	0	0	45	0	0	0	0	0	0	0	0	0	0	0	0	0	0
abcb1e2b9445d5b33cebfd38f24b575c	ASV3611	Bacteria	Bacteroidota	Bacteroidia	Chitinophagales	Saprospiraceae	Phaeodactylibacter	uncultured_Bacteroidetes	0	0	0	5	6	11	9	7	0	0	0	0	0	0	0	0	0	0	0	0	0	0	0	0	0	0	0	0	0	0	0	0	5	0	0	0	0	0	0	0	0
bf49b9ddcc1ee0834e1537ccc77accaf	ASV4011	Bacteria	Bacteroidota	Bacteroidia	Chitinophagales	Saprospiraceae	Phaeodactylibacter	uncultured_bacterium	0	0	0	0	0	0	0	0	0	0	0	0	0	3	17	0	0	0	0	0	0	0	0	0	0	0	0	14	0	0	0	0	0	0	0	0	0	0	5	0	0
fa1973d3fd10f5bba09e40558c6b1702	ASV5287	Bacteria	Bacteroidota	Bacteroidia	Chitinophagales	Saprospiraceae	Portibacter	uncultured_Bacteroidetes	95	176	231	789	121	203	77	0	0	0	0	81	261	104	226	383	490	451	150	239	181	386	85	311	145	0	0	115	0	0	144	0	0	101	386	153	140	187	0	105	89
00f912e4d739a675d8c6a005aa646091	ASV122	Bacteria	Bacteroidota	Bacteroidia	Chitinophagales	Saprospiraceae	Portibacter	uncultured_Bacteroidetes	37	259	229	114	20	30	24	16	21	16	20	30	43	13	27	59	0	50	0	48	85	22	15	114	0	47	57	26	14	64	0	0	16	0	10	0	15	30	31	109	22
f152723295c6a85ee348a83152aaffc6	ASV5266	Bacteria	Bacteroidota	Bacteroidia	Chitinophagales	Saprospiraceae	Portibacter	uncultured_bacterium	59	0	39	64	59	43	0	0	0	0	0	54	122	25	50	58	20	62	61	64	64	11	28	51	24	0	0	0	0	0	101	0	0	0	18	0	14	54	0	0	0
30e901631af6d17cb97aa9a194c35782	ASV1515	Bacteria	Bacteroidota	Bacteroidia	Chitinophagales	Saprospiraceae	Portibacter	uncultured_deep-sea	47	37	37	22	34	33	33	19	23	0	27	15	21	29	26	51	29	78	17	45	29	24	49	28	46	22	20	17	9	12	21	17	16	23	19	41	40	43	36	14	23
2a7933f6c8a6fb9a16809bee6744583f	ASV288	Bacteria	Bacteroidota	Bacteroidia	Chitinophagales	Saprospiraceae	Portibacter	NA	60	16	29	47	0	23	40	58	25	15	0	8	26	13	29	34	17	57	11	20	46	32	8	38	0	44	0	53	9	80	26	13	25	21	27	20	12	21	46	24	13
ee50d90e64ebeed9f1b8ae7ac9b9df89	ASV5027	Bacteria	Bacteroidota	Bacteroidia	Chitinophagales	Saprospiraceae	Portibacter	uncultured_Bacteroidetes	28	29	39	19	0	41	0	0	0	0	0	0	33	0	27	59	58	83	0	83	38	0	37	0	0	0	0	0	0	0	59	0	0	0	0	0	185	35	0	18	38
7a262be825e1f989c7c1e91af6c01f76	ASV940	Bacteria	Bacteroidota	Bacteroidia	Chitinophagales	Saprospiraceae	Portibacter	uncultured_Bacteroidetes	0	0	0	0	0	0	0	58	0	0	51	0	0	0	0	0	0	0	0	0	0	0	0	0	0	37	42	0	0	0	0	0	0	0	72	55	0	0	30	0	0
c495ad75b01faf43166fb970f83acbd8	ASV4189	Bacteria	Bacteroidota	Bacteroidia	Chitinophagales	Saprospiraceae	Portibacter	uncultured_bacterium	11	0	0	0	25	0	0	22	16	10	0	22	0	16	0	0	11	0	0	0	0	12	0	21	19	40	12	17	0	0	0	0	10	12	20	0	0	0	14	0	0
c1417903d4086db781c4f94753150afb	ASV4254	Bacteria	Bacteroidota	Bacteroidia	Chitinophagales	Saprospiraceae	Portibacter	uncultured_Bacteroidetes	23	0	0	0	0	0	0	0	0	0	0	0	0	0	0	0	0	25	0	0	0	0	0	40	33	0	0	0	0	0	0	0	20	0	68	64	23	0	0	0	0
8b8370cbb9b3ebbc70fef2b174acc915	ASV1107	Bacteria	Bacteroidota	Bacteroidia	Chitinophagales	Saprospiraceae	Portibacter	uncultured_bacterium	0	37	0	0	0	0	64	39	17	0	0	0	0	0	0	0	0	0	0	0	0	0	0	0	0	41	0	11	10	0	0	0	0	0	0	0	0	0	19	0	0
0105484086cc3bc99dfb61f513d8addd	ASV3317	Bacteria	Bacteroidota	Bacteroidia	Chitinophagales	Saprospiraceae	Portibacter	uncultured_Bacteroidetes	0	0	0	0	0	0	49	0	0	0	0	0	0	0	0	0	0	0	0	0	0	0	0	0	0	17	14	52	0	0	0	0	31	0	0	0	0	0	0	0	0
eeb3c9104e704d7d7cc2609d3c3da2bd	ASV5044	Bacteria	Bacteroidota	Bacteroidia	Chitinophagales	Saprospiraceae	Portibacter	uncultured_bacterium	0	0	0	0	0	8	0	0	0	0	0	0	0	0	26	0	6	0	0	0	21	0	0	0	0	0	0	0	0	22	0	0	0	0	0	0	0	0	0	0	0
aab8134cb8b5c792818667fa17da7420	ASV3589	Bacteria	Bacteroidota	Bacteroidia	Chitinophagales	Saprospiraceae	Portibacter	uncultured_bacterium	0	16	0	0	0	0	0	0	0	0	0	0	0	0	0	0	5	0	0	0	0	0	0	0	0	35	0	0	0	33	0	0	9	0	0	0	0	0	0	0	0
38d2c76c4de5b957b9acef2de0adb3ee	ASV1573	Bacteria	Bacteroidota	Bacteroidia	Chitinophagales	Saprospiraceae	Portibacter	uncultured_bacterium	0	0	0	0	0	0	0	28	0	0	6	0	0	0	0	0	0	0	0	0	0	0	0	11	0	0	7	0	0	35	0	0	0	8	0	0	0	0	0	0	0
a50505d69a755f087b8836beaf9e7c5f	ASV3548	Bacteria	Bacteroidota	Bacteroidia	Chitinophagales	Saprospiraceae	Portibacter	uncultured_Bacteroidetes	0	0	0	0	0	0	0	0	0	0	0	0	0	0	0	0	0	0	0	0	0	0	0	89	0	0	0	0	0	0	0	0	0	0	0	0	0	0	0	0	0
b317392af73bbc791beb67913e895a12	ASV3881	Bacteria	Bacteroidota	Bacteroidia	Chitinophagales	Saprospiraceae	Portibacter	uncultured_Bacteroidetes	0	0	0	0	0	0	44	0	0	0	0	0	0	0	0	0	0	0	0	0	0	0	0	0	0	22	0	0	0	0	0	0	0	0	0	0	0	0	0	0	0
64bbe0cee03e3fc0c01308de949c6a5a	ASV1766	Bacteria	Bacteroidota	Bacteroidia	Chitinophagales	Saprospiraceae	Portibacter	uncultured_Bacteroidetes	0	0	0	0	0	0	0	0	0	0	0	0	0	0	0	0	0	0	0	0	0	0	0	0	0	25	0	0	0	27	0	0	0	0	0	0	0	0	11	0	0
5373aecff08857e67782f4d54d0ed947	ASV2701	Bacteria	Bacteroidota	Bacteroidia	Chitinophagales	Saprospiraceae	Portibacter	uncultured_Bacteroidetes	0	0	0	0	0	0	0	0	58	0	0	0	0	0	0	0	0	0	0	0	0	0	0	0	0	0	0	0	0	0	0	0	0	0	0	0	0	0	0	0	0
8ceb065d04b12b978d75d1bcab931b63	ASV1131	Bacteria	Bacteroidota	Bacteroidia	Chitinophagales	Saprospiraceae	Portibacter	NA	0	0	0	0	0	0	56	0	0	0	0	0	0	0	0	0	0	0	0	0	0	0	0	0	0	0	0	0	0	0	0	0	0	0	0	0	0	0	0	0	0
80efe8a79b32af262d96418641a51560	ASV1908	Bacteria	Bacteroidota	Bacteroidia	Chitinophagales	Saprospiraceae	Portibacter	uncultured_Bacteroidetes	0	0	0	0	0	0	0	0	0	0	0	0	0	0	0	0	0	0	0	0	0	0	0	0	0	0	0	0	21	0	0	0	0	0	0	0	0	0	15	0	0
b7dea3709016c7957011eb0e07e8c99f	ASV3749	Bacteria	Bacteroidota	Bacteroidia	Chitinophagales	Saprospiraceae	Portibacter	uncultured_Bacteroidetes	0	0	0	0	0	0	0	0	33	0	0	0	0	0	0	0	0	0	0	0	0	0	0	0	0	0	0	0	0	0	0	0	0	0	0	0	0	0	0	0	0
363d552384f236ee62bf9a9d7d2ee057	ASV2236	Bacteria	Bacteroidota	Bacteroidia	Chitinophagales	Saprospiraceae	Portibacter	uncultured_bacterium	0	0	0	7	0	0	0	0	0	0	0	0	4	0	0	0	0	0	0	3	11	0	0	0	0	0	0	0	0	0	0	0	0	0	0	0	0	0	0	0	0
e139285ad7619602791e4797352e9957	ASV4927	Bacteria	Bacteroidota	Bacteroidia	Chitinophagales	Saprospiraceae	Rubidimonas	uncultured_bacterium	0	54	205	19	13	20	0	0	0	0	0	74	0	22	30	0	0	14	0	0	31	0	34	93	0	0	0	0	4	0	38	0	0	0	0	0	0	0	0	0	18
93b15c142624bd84e0d19031758cb568	ASV2030	Bacteria	Bacteroidota	Bacteroidia	Chitinophagales	Saprospiraceae	Rubidimonas	uncultured_bacterium	0	0	0	0	0	0	26	26	10	0	0	0	0	0	0	0	0	0	0	0	0	0	0	0	0	92	7	78	132	0	0	0	8	27	0	0	0	0	65	0	0
8a778462a2c66757b138ef3a7191978a	ASV1081	Bacteria	Bacteroidota	Bacteroidia	Chitinophagales	uncultured	uncultured	NA	0	0	0	0	0	0	0	0	20	0	0	0	0	0	5	0	0	23	0	0	0	0	365	0	0	0	0	442	1798	0	0	0	34	0	0	428	0	562	21	7	0
9aafa18ae1acd1a9a26eab678b764fc9	ASV1224	Bacteria	Bacteroidota	Bacteroidia	Chitinophagales	Saprospiraceae	uncultured	uncultured_Sphingobacterium	38	31	68	31	0	0	234	246	91	99	113	0	49	98	42	33	34	50	126	160	0	84	0	34	31	242	136	296	131	48	0	83	82	237	159	0	0	76	199	34	0
7fc808733b7019e077e6d8c066000aec	ASV1057	Bacteria	Bacteroidota	Bacteroidia	Chitinophagales	uncultured	uncultured	NA	0	103	328	46	83	188	67	59	131	93	72	148	50	128	127	38	19	78	18	43	0	42	189	72	18	57	29	7	0	26	87	0	44	161	44	10	8	59	103	7	15
99cabc5d2f698f2147fbad9ffb2b7b08	ASV2087	Bacteria	Bacteroidota	Bacteroidia	Chitinophagales	uncultured	uncultured	uncultured_bacterium	36	34	158	59	230	143	0	0	0	0	0	215	71	91	57	48	80	53	78	86	60	116	198	72	21	0	0	0	0	0	105	0	0	0	67	71	50	69	0	34	26
261035f738e3c631ffbd370f939f1ccb	ASV3089	Bacteria	Bacteroidota	Bacteroidia	Chitinophagales	Saprospiraceae	uncultured	NA	0	0	28	0	0	0	115	69	87	43	93	0	18	0	0	115	31	37	45	0	0	0	0	28	49	90	46	82	36	0	23	70	0	135	40	78	40	0	99	29	57
4a1bfa9eba8c6e46e69fd05f3d0e2bff	ASV534	Bacteria	Bacteroidota	Bacteroidia	Chitinophagales	uncultured	uncultured	uncultured_Sphingobacteriales	45	35	67	39	50	36	26	36	26	0	16	30	33	32	37	41	24	62	8	32	27	24	35	72	34	16	0	22	13	10	54	0	0	21	33	47	42	35	18	32	40
d1518cb7014a85a13b09a5ad40e1e550	ASV4527	Bacteria	Bacteroidota	Bacteroidia	Chitinophagales	uncultured	uncultured	uncultured_organism	0	17	112	30	0	21	36	20	25	15	15	58	20	0	41	8	14	24	15	0	0	0	12	36	0	85	12	96	28	57	22	0	6	15	124	37	0	27	70	11	9
b631006e450a7c10570e0efae3f57fa4	ASV3884	Bacteria	Bacteroidota	Bacteroidia	Chitinophagales	Saprospiraceae	uncultured	uncultured_Sphingobacterium	33	0	31	0	0	0	37	0	69	23	0	0	0	0	0	174	41	72	0	0	0	0	34	39	0	0	63	73	0	0	0	69	46	36	48	25	37	66	43	20	23
160a0b8bdc77ba7457db1c1ab467831f	ASV2124	Bacteria	Bacteroidota	Bacteroidia	Chitinophagales	uncultured	uncultured	uncultured_Bacteroidetes	34	0	104	21	0	23	0	0	0	0	0	33	75	34	31	31	0	77	0	78	39	20	37	88	19	0	0	0	0	0	81	0	0	0	16	13	34	120	0	37	16
7020cebacac02b016ef6f068747b6772	ASV2754	Bacteria	Bacteroidota	Bacteroidia	Chitinophagales	Saprospiraceae	uncultured	uncultured_marine	0	0	55	10	110	40	99	0	13	52	48	34	88	125	89	0	0	25	0	0	0	0	24	28	0	36	0	53	38	12	0	9	0	33	0	0	0	0	0	0	21
0643d02101dafbaa02397e0e11a1bff7	ASV2378	Bacteria	Bacteroidota	Bacteroidia	Chitinophagales	Saprospiraceae	uncultured	NA	25	0	64	15	55	43	51	43	18	0	0	0	30	49	0	0	29	39	0	29	35	27	51	0	0	47	0	29	27	0	40	21	26	40	19	0	0	0	28	0	0
6bc7e1a6148fad7ffcae30423922613e	ASV843	Bacteria	Bacteroidota	Bacteroidia	Chitinophagales	Saprospiraceae	uncultured	uncultured_Sphingobacteriia	0	0	0	0	0	0	63	41	69	34	69	0	36	0	22	0	0	0	16	0	0	0	0	12	0	62	30	32	28	33	0	33	46	80	21	0	42	17	64	0	13
26996341a4e65a9a07b0b3ec61b55a74	ASV3285	Bacteria	Bacteroidota	Bacteroidia	Chitinophagales	Saprospiraceae	uncultured	NA	16	0	25	39	30	46	0	0	0	0	0	11	23	15	11	0	28	31	18	17	13	0	0	84	0	48	8	0	19	0	34	0	12	11	92	46	23	30	29	0	9
4f206b74c3e9ba8db617c0101dbf079c	ASV664	Bacteria	Bacteroidota	Bacteroidia	Chitinophagales	uncultured	uncultured	uncultured_Bacteroidetes	25	43	25	24	40	57	0	0	0	0	0	26	28	42	21	15	10	39	28	42	15	48	32	28	0	0	0	0	11	0	61	0	0	0	9	10	0	46	0	6	0
293cb393bce6dfa4e367a2e8bc40a33b	ASV2194	Bacteria	Bacteroidota	Bacteroidia	Chitinophagales	Saprospiraceae	uncultured	NA	18	0	0	7	0	10	19	34	23	0	91	0	0	16	37	48	0	27	0	16	0	0	0	57	21	43	41	20	0	0	0	24	20	50	0	0	19	0	37	25	0
f7f3a4f61827bfb89457f334d7a8190f	ASV5140	Bacteria	Bacteroidota	Bacteroidia	Chitinophagales	Saprospiraceae	uncultured	NA	0	0	25	0	22	18	24	86	26	0	11	31	10	12	0	0	0	0	18	0	0	17	0	0	0	84	10	40	20	20	26	26	43	0	21	0	0	0	45	0	0
73aa7126b9faaafec3a47cdfae52456c	ASV1848	Bacteria	Bacteroidota	Bacteroidia	Chitinophagales	uncultured	uncultured	uncultured_bacterium	0	113	54	0	23	0	0	61	6	0	0	79	0	16	0	0	0	0	21	0	0	11	0	0	0	15	0	0	0	7	84	0	0	52	10	0	0	0	0	0	0
d5c7cab10bb3b00808395d57cede790d	ASV4444	Bacteria	Bacteroidota	Bacteroidia	Chitinophagales	Saprospiraceae	uncultured	uncultured_Sphingobacterium	0	0	0	0	75	195	0	0	0	0	0	0	0	0	0	0	0	0	0	0	47	0	38	0	0	0	0	0	0	0	121	0	0	0	0	0	0	0	0	0	0
ba7fee51c13f39d72c99c9a12bfe885b	ASV3897	Bacteria	Bacteroidota	Bacteroidia	Chitinophagales	uncultured	uncultured	uncultured_Bacteroidetes	0	0	0	0	0	0	66	0	7	0	0	0	0	0	0	0	0	0	54	0	0	0	0	0	0	76	32	4	0	4	0	0	0	24	0	0	0	0	252	0	0
0cacfdf0ab73e1353982f75c85a947c2	ASV56	Bacteria	Bacteroidota	Bacteroidia	Chitinophagales	Saprospiraceae	uncultured	NA	26	24	0	0	16	15	0	0	0	0	0	9	29	20	27	55	14	21	0	14	6	14	9	22	32	0	0	0	0	0	33	0	0	0	25	6	30	19	0	10	24
4f0baeb503bfa9563371763babfb946a	ASV654	Bacteria	Bacteroidota	Bacteroidia	Chitinophagales	uncultured	uncultured	uncultured_Bacteroidetes	0	0	0	24	0	0	80	16	0	11	0	13	0	12	0	0	0	0	9	0	0	0	0	0	0	0	0	72	0	0	0	0	0	0	17	0	0	26	29	0	0
ce1710e113c97a864bd3fbf64f5bc635	ASV4361	Bacteria	Bacteroidota	Bacteroidia	Chitinophagales	uncultured	uncultured	uncultured_Bacteroidetes	0	15	0	0	23	33	11	0	0	0	0	0	0	0	28	34	31	46	12	0	30	0	0	24	0	0	0	35	13	0	0	0	0	28	14	0	43	0	17	19	25
2d341c37a3f7431cdf09e2a80e89c2d1	ASV347	Bacteria	Bacteroidota	Bacteroidia	Chitinophagales	Saprospiraceae	uncultured	NA	0	0	0	0	0	0	28	0	0	0	0	0	0	0	0	0	0	0	14	0	0	0	0	0	0	0	0	121	14	22	0	0	0	0	0	0	0	0	0	0	0
88672a3b2c002a8a0f2f58a73f99f9b0	ASV3029	Bacteria	Bacteroidota	Bacteroidia	Chitinophagales	Saprospiraceae	uncultured	NA	0	0	38	9	12	39	0	0	17	0	0	23	35	18	0	0	7	0	0	0	17	18	0	9	0	0	0	0	0	0	42	0	12	0	22	0	0	0	15	0	8
3d348263152eac24c4cc404923486b2e	ASV486	Bacteria	Bacteroidota	Bacteroidia	Chitinophagales	uncultured	uncultured	uncultured_organism	0	9	14	0	19	17	0	0	0	0	0	17	32	20	25	32	14	33	15	0	15	0	20	18	0	0	0	0	0	0	20	0	0	0	0	0	0	20	0	0	15
5b33466d5de82ae98219f55072db6c75	ASV700	Bacteria	Bacteroidota	Bacteroidia	Chitinophagales	uncultured	uncultured	uncultured_Bacteroidetes	0	0	24	0	0	0	7	0	11	0	0	38	0	0	0	0	0	0	0	0	3	0	0	27	0	61	0	18	28	0	11	0	0	0	51	12	0	7	13	0	8
d7440985ae4de74ba5949d6c62511f5f	ASV4568	Bacteria	Bacteroidota	Bacteroidia	Chitinophagales	Saprospiraceae	uncultured	uncultured_marine	0	0	0	0	0	0	0	0	0	0	0	0	0	32	0	0	0	0	0	0	0	0	0	0	0	64	0	0	222	0	0	0	0	0	0	0	0	0	0	0	0
04d39c325c27d2013ef903c4cfc6f7ec	ASV606	Bacteria	Bacteroidota	Bacteroidia	Chitinophagales	Saprospiraceae	uncultured	NA	9	0	15	0	11	0	0	7	0	0	0	0	0	0	14	21	18	13	0	43	0	0	0	20	12	10	0	0	12	0	13	11	9	10	0	0	13	16	20	0	8
66b708ac866e2315ddea41e6cbe4057f	ASV1790	Bacteria	Bacteroidota	Bacteroidia	Chitinophagales	Saprospiraceae	uncultured	NA	35	11	0	0	0	0	0	0	0	0	0	0	0	0	0	36	11	16	0	10	14	0	0	0	21	0	0	0	0	0	0	0	0	0	14	44	39	0	0	0	46
eeefb88fa3336672bbbad7bbf193ac9f	ASV5049	Bacteria	Bacteroidota	Bacteroidia	Chitinophagales	uncultured	uncultured	uncultured_bacterium	0	0	46	0	0	0	32	0	0	7	0	0	0	0	9	0	0	0	0	0	0	0	0	0	0	0	0	0	0	43	14	0	0	0	0	0	0	0	0	0	0
0b5ed03b2b5795ecce75845653c60805	ASV27	Bacteria	Bacteroidota	Bacteroidia	Chitinophagales	Saprospiraceae	uncultured	NA	0	0	0	0	0	35	0	0	0	0	0	0	0	0	0	25	0	0	0	0	37	0	0	40	5	0	0	0	0	0	11	0	0	0	32	20	46	0	0	12	0
680e2797d835b236c572a1edcadaeea7	ASV2396	Bacteria	Bacteroidota	Bacteroidia	Chitinophagales	uncultured	uncultured	NA	0	0	32	11	14	0	19	0	6	0	0	0	0	0	4	6	0	0	0	0	0	20	0	12	0	30	0	0	20	0	0	18	12	0	23	10	0	0	25	0	0
3f4c1e332c95d3209a6eb19d2b5a6060	ASV520	Bacteria	Bacteroidota	Bacteroidia	Chitinophagales	Saprospiraceae	uncultured	uncultured_Bacteroidetes	0	0	0	0	26	0	0	0	0	8	18	34	0	0	12	0	0	47	0	0	38	0	18	29	0	0	0	0	0	0	20	0	0	0	0	0	8	0	0	0	0
0977f15186d774a061c39616620660f5	ASV2549	Bacteria	Bacteroidota	Bacteroidia	Chitinophagales	Saprospiraceae	uncultured	uncultured_Lewinella	8	10	0	9	0	17	0	13	0	0	8	30	23	0	18	0	0	0	8	0	21	0	7	15	0	9	8	6	0	0	17	6	0	0	0	0	0	0	0	0	23
03b619deae13edc67a7accdd04d2951c	ASV438	Bacteria	Bacteroidota	Bacteroidia	Chitinophagales	Saprospiraceae	uncultured	uncultured_organism	0	0	36	0	62	22	0	0	0	0	10	21	26	0	0	0	0	5	0	0	0	0	0	0	0	16	0	8	0	15	0	0	27	6	0	0	0	0	0	0	0
8982eab0229d77fe1f260e83afbcd777	ASV2821	Bacteria	Bacteroidota	Bacteroidia	Chitinophagales	uncultured	uncultured	uncultured_Bacteroidetes	0	17	18	13	12	0	12	0	9	0	11	10	20	0	5	9	8	0	0	13	0	0	0	0	0	13	0	0	0	0	0	0	5	0	0	25	9	6	8	8	0
43c108ce8d4f714828984d931b40ea3a	ASV1609	Bacteria	Bacteroidota	Bacteroidia	Chitinophagales	Saprospiraceae	uncultured	NA	0	18	16	9	22	16	0	12	0	0	0	10	9	13	0	0	0	18	0	14	17	9	11	0	10	0	0	9	0	0	0	0	0	5	0	0	9	9	0	5	0
2e2776104572b299ca7bc0c7f38eb7b7	ASV373	Bacteria	Bacteroidota	Bacteroidia	Chitinophagales	uncultured	uncultured	uncultured_organism	0	0	31	0	11	0	0	0	0	0	0	0	18	13	21	5	12	0	0	9	0	0	0	16	0	22	6	11	9	0	0	0	0	0	0	10	0	0	0	9	8
6a4fd4c2bc44e468d49f10219a345b9e	ASV810	Bacteria	Bacteroidota	Bacteroidia	Chitinophagales	uncultured	uncultured	uncultured_bacterium	0	0	33	0	0	0	10	14	0	0	60	0	0	0	0	0	0	0	0	0	0	0	0	0	0	32	20	7	0	0	0	12	40	4	0	0	0	0	11	0	0
e983babd0a9dbab17c944dc59ee7c521	ASV4903	Bacteria	Bacteroidota	Bacteroidia	Chitinophagales	Saprospiraceae	uncultured	NA	0	21	19	0	0	15	0	0	18	0	10	14	0	0	0	0	0	0	7	0	0	0	0	0	0	75	0	0	0	15	14	14	10	0	0	0	0	0	0	0	0
1770a7f73fd299a06268a567c9336d31	ASV2586	Bacteria	Bacteroidota	Bacteroidia	Chitinophagales	uncultured	uncultured	uncultured_bacterium	0	0	0	0	0	0	0	0	0	0	0	0	0	0	0	0	0	0	0	0	0	0	0	0	0	0	0	0	0	0	0	0	0	0	0	0	0	0	228	0	0
78bf2f72ae6e84279809680ddca2211b	ASV1894	Bacteria	Bacteroidota	Bacteroidia	Chitinophagales	uncultured	uncultured	uncultured_Saprospiraceae	0	7	32	0	21	21	0	0	0	0	0	23	19	22	0	0	0	0	0	0	12	26	0	0	0	0	0	0	0	0	8	0	0	0	0	0	0	0	0	0	0
ad7e4799048322cc5df331c3b1d8d015	ASV3641	Bacteria	Bacteroidota	Bacteroidia	Chitinophagales	uncultured	uncultured	uncultured_Bacteroidetes	0	0	0	20	6	0	0	0	0	0	0	0	0	9	18	0	15	23	0	30	0	9	12	19	0	0	0	0	0	0	8	0	0	0	0	7	20	0	0	7	12
d8aeb2769a0162563a1cf19a39e74bb2	ASV4468	Bacteria	Bacteroidota	Bacteroidia	Chitinophagales	Saprospiraceae	uncultured	uncultured_bacterium	0	10	18	14	0	0	0	6	0	0	6	10	0	0	0	0	0	0	0	18	13	0	0	0	0	21	0	16	9	0	5	19	0	16	8	0	8	19	0	0	0
9f0d864fc0ce70d81443b608eb25e0f3	ASV1333	Bacteria	Bacteroidota	Bacteroidia	Chitinophagales	Saprospiraceae	uncultured	NA	0	0	10	0	0	0	0	10	21	0	20	0	8	0	0	0	0	23	0	15	0	23	0	0	0	22	8	0	11	0	0	0	10	0	0	13	0	0	10	0	7
ec417fab8e6d4fd3c52beb2c03700cbe	ASV4990	Bacteria	Bacteroidota	Bacteroidia	Chitinophagales	Saprospiraceae	uncultured	NA	0	18	0	0	10	0	0	0	0	0	0	0	0	0	9	67	20	29	0	12	0	8	9	0	0	0	0	0	0	0	0	0	0	0	0	0	9	0	0	8	0
286960e58c0f0f37da06a1484e9e8509	ASV3097	Bacteria	Bacteroidota	Bacteroidia	Chitinophagales	Saprospiraceae	uncultured	uncultured_Bacteroidetes	0	27	0	0	0	0	0	17	0	0	19	0	4	0	0	0	0	11	0	0	12	0	0	13	0	24	0	0	0	0	0	14	0	0	0	0	0	9	21	0	18
daafac05fca3174e20c091b669c8f8c4	ASV4591	Bacteria	Bacteroidota	Bacteroidia	Chitinophagales	uncultured	uncultured	uncultured_Sphingobacteriales	0	0	24	9	0	0	0	0	6	0	0	0	13	0	6	0	0	0	5	9	17	0	13	0	0	8	0	0	0	39	0	0	0	0	0	0	0	0	11	0	0
9f572531ec557b5c784d1356115fe1ff	ASV1344	Bacteria	Bacteroidota	Bacteroidia	Chitinophagales	Saprospiraceae	uncultured	uncultured_bacterium	0	0	0	0	0	0	52	10	0	0	0	0	0	0	0	0	0	26	0	0	0	0	0	0	21	0	0	29	0	25	0	0	0	0	0	0	0	0	0	0	0
6cf8e8963b0e2decd82d6e23477a566c	ASV868	Bacteria	Bacteroidota	Bacteroidia	Chitinophagales	uncultured	uncultured	uncultured_organism	0	0	53	10	0	0	0	0	0	0	0	0	0	18	0	0	0	0	6	0	0	0	15	8	0	0	0	0	0	0	0	0	0	0	0	0	0	0	13	0	0
a700fc33004220a426147a4683129ebb	ASV3526	Bacteria	Bacteroidota	Bacteroidia	Chitinophagales	uncultured	uncultured	uncultured_Sphingobacteriales	0	0	0	0	0	0	0	0	0	0	0	0	0	0	0	0	0	0	0	0	0	0	0	0	0	0	0	0	7	173	0	0	0	0	0	0	0	0	0	0	0
efd32c7fb6206ffd98704ed16d49ac07	ASV5074	Bacteria	Bacteroidota	Bacteroidia	Chitinophagales	uncultured	uncultured	uncultured_bacterium	0	0	0	0	0	0	0	0	0	0	22	0	0	0	0	0	0	0	0	0	0	0	0	0	0	93	49	0	0	0	0	0	0	0	0	0	0	0	0	0	0
36840e6ffb1bd6feb24d6bb1863c9bee	ASV2930	Bacteria	Bacteroidota	Bacteroidia	Chitinophagales	uncultured	uncultured	uncultured_Bacteroidetes	39	7	0	31	0	0	0	0	0	0	0	14	0	11	0	0	8	0	0	16	0	0	0	11	26	0	0	0	0	0	0	0	0	0	0	0	0	0	0	0	0
f8afef8b3eebd858ecc2950db3e284f8	ASV5143	Bacteria	Bacteroidota	Bacteroidia	Chitinophagales	Saprospiraceae	uncultured	uncultured_bacterium	0	0	0	0	0	0	0	36	0	7	29	0	0	0	0	5	0	0	0	0	0	0	0	0	0	32	29	18	0	0	0	0	0	0	0	0	0	0	0	0	0
5a678bd711a9733a4ae64764429cad68	ASV680	Bacteria	Bacteroidota	Bacteroidia	Chitinophagales	uncultured	uncultured	NA	6	0	0	3	0	0	0	5	7	0	0	9	8	0	0	15	0	10	0	18	0	0	12	0	8	0	0	0	0	0	0	0	0	0	0	11	14	0	0	28	0
4d62f8b5223ddcf4c12a752bae80f46e	ASV608	Bacteria	Bacteroidota	Bacteroidia	Chitinophagales	Saprospiraceae	uncultured	uncultured_bacterium	0	0	29	0	17	0	0	17	22	0	0	0	0	0	0	0	10	0	0	15	0	0	8	0	0	10	0	0	0	0	0	0	11	0	0	0	0	0	0	0	0
ffc470eadb9ae3d8a3aef7735a8e4eb8	ASV5383	Bacteria	Bacteroidota	Bacteroidia	Chitinophagales	uncultured	uncultured	NA	19	0	0	6	8	0	0	0	0	0	0	0	0	0	0	12	9	12	0	0	18	11	0	7	9	0	0	0	0	0	0	0	0	0	0	0	8	0	0	15	16
3644b4e66ecebf8865736e4790d36794	ASV2648	Bacteria	Bacteroidota	Bacteroidia	Chitinophagales	Saprospiraceae	uncultured	NA	0	0	23	0	0	0	24	0	0	0	0	0	0	26	0	0	0	0	0	0	0	0	0	0	0	0	0	12	12	24	0	0	0	0	0	0	0	0	0	0	0
b94e6dafc32a6e4957ad3109bf46164e	ASV3819	Bacteria	Bacteroidota	Bacteroidia	Chitinophagales	uncultured	uncultured	uncultured_Sphingobacteriales	0	0	0	0	39	0	0	0	0	0	0	0	31	0	30	0	0	0	0	0	0	0	0	0	0	0	0	0	0	0	0	0	0	13	0	0	0	0	0	5	0
f06c386665dbe2f05ae4e132916b0505	ASV5125	Bacteria	Bacteroidota	Bacteroidia	Chitinophagales	uncultured	uncultured	NA	0	0	125	0	0	0	0	0	0	0	0	0	0	0	0	0	0	0	0	0	0	0	0	0	0	0	0	0	0	0	0	0	0	0	0	0	0	17	0	0	0
ad590a95be7f40c8c66d3c5f5ee5b4b0	ASV3649	Bacteria	Bacteroidota	Bacteroidia	Chitinophagales	Saprospiraceae	uncultured	uncultured_bacterium	0	0	0	0	0	0	0	0	0	0	0	0	136	0	0	0	0	0	0	0	0	0	0	0	0	0	0	0	0	0	0	0	0	0	0	0	0	0	0	0	0
6fa0a9e93095c118198cef76159f053b	ASV929	Bacteria	Bacteroidota	Bacteroidia	Chitinophagales	Saprospiraceae	uncultured	uncultured_Bacteroidetes	0	0	24	0	0	0	0	0	0	0	0	0	0	0	0	0	0	0	0	34	0	21	0	0	0	0	0	19	0	0	0	0	0	0	0	0	0	0	0	0	0
f137ec2c366c86e42264f1ebeba93530	ASV5205	Bacteria	Bacteroidota	Bacteroidia	Chitinophagales	uncultured	uncultured	NA	0	0	0	0	0	0	8	4	5	0	36	0	0	0	0	0	0	0	0	0	0	0	0	0	0	18	16	8	10	0	0	0	0	7	0	0	0	0	22	0	0
c154851ac46ddbda666e195e7f8e78b7	ASV4246	Bacteria	Bacteroidota	Bacteroidia	Chitinophagales	uncultured	uncultured	uncultured_Bacteroidetes	0	0	0	0	0	0	33	15	0	16	33	0	0	0	0	0	0	0	0	13	0	0	0	0	0	0	0	0	0	0	0	0	0	0	0	0	0	0	0	0	22
3372b68ca473914ed1714a3d1a393084	ASV2641	Bacteria	Bacteroidota	Bacteroidia	Chitinophagales	Saprospiraceae	uncultured	NA	0	0	0	0	0	0	0	0	0	0	0	0	61	0	0	0	0	0	0	0	0	0	0	0	0	0	0	0	0	23	27	0	0	0	0	0	0	0	0	0	0
42522a3cd355e5c161f9f74996b8e0ce	ASV2942	Bacteria	Bacteroidota	Bacteroidia	Chitinophagales	Saprospiraceae	uncultured	NA	0	0	0	0	0	0	0	19	0	0	0	0	0	0	0	0	0	0	0	0	0	0	0	0	0	3	0	0	91	0	0	0	0	0	0	0	0	0	14	0	0
6179698eec956502056ba010f479d6f0	ASV3242	Bacteria	Bacteroidota	Bacteroidia	Chitinophagales	uncultured	uncultured	uncultured_Sphingobacteriales	0	0	0	0	0	0	0	0	0	0	0	38	0	0	0	0	21	28	0	0	0	0	0	0	0	0	0	0	0	0	0	0	0	0	36	0	0	0	0	0	0
3ada0967f0ee545be695d84b6519acc2	ASV428	Bacteria	Bacteroidota	Bacteroidia	Chitinophagales	Saprospiraceae	uncultured	uncultured_bacterium	0	0	0	0	0	0	0	0	0	0	0	0	0	0	14	0	0	0	0	0	0	0	0	0	0	0	0	0	0	0	0	0	0	0	107	0	0	0	0	0	0
5e2e20cbbf12bf42458c123ccd90c14d	ASV762	Bacteria	Bacteroidota	Bacteroidia	Chitinophagales	uncultured	uncultured	uncultured_Bacteroidetes	0	0	7	0	0	0	14	0	0	0	0	0	0	0	0	0	0	0	0	58	0	0	6	9	0	0	0	0	0	0	0	0	0	0	0	0	23	0	0	0	4
e8a29a544ea0a66c83a7d52655bae68f	ASV4806	Bacteria	Bacteroidota	Bacteroidia	Chitinophagales	Saprospiraceae	uncultured	NA	0	5	0	0	0	5	0	0	0	0	22	0	0	9	0	0	0	0	0	0	0	0	0	66	0	10	0	0	0	0	0	0	0	0	0	0	0	0	0	0	0
46cdb2f0cd45c44c92bb5733e277f8cb	ASV1635	Bacteria	Bacteroidota	Bacteroidia	Chitinophagales	Saprospiraceae	uncultured	NA	0	11	15	17	0	0	0	0	0	0	0	0	0	0	0	0	0	24	0	18	0	0	12	11	0	0	0	0	0	0	0	0	0	0	0	0	0	0	0	0	0
2b7038d7d3bdc8c70d75b801c250a8a3	ASV308	Bacteria	Bacteroidota	Bacteroidia	Chitinophagales	uncultured	uncultured	uncultured_Bacteroidetes	0	0	0	0	0	0	0	0	26	0	0	0	0	0	0	0	0	0	0	0	0	0	0	0	0	12	0	8	19	0	0	0	0	0	0	0	0	0	40	0	0
582f964449c1d7fffd0483e65a99e4c4	ASV2350	Bacteria	Bacteroidota	Bacteroidia	Chitinophagales	Saprospiraceae	uncultured	uncultured_organism	0	9	0	0	0	20	0	0	0	0	0	0	0	15	0	0	0	0	0	0	0	0	0	8	0	22	0	0	0	0	7	0	0	0	23	0	0	0	0	0	0
02846c6bf641421601a9208102038051	ASV2624	Bacteria	Bacteroidota	Bacteroidia	Chitinophagales	Saprospiraceae	uncultured	NA	0	0	0	0	0	0	0	0	0	0	0	0	0	0	9	15	0	0	0	13	0	10	0	0	0	9	0	0	0	0	9	0	9	0	14	0	0	0	11	0	0
6cb497099873d94227d95e7c43f937be	ASV862	Bacteria	Bacteroidota	Bacteroidia	Chitinophagales	uncultured	uncultured	uncultured_Bacteroidetes	0	19	0	0	10	0	0	0	0	0	0	0	12	12	0	0	0	0	0	0	0	0	0	22	0	0	0	0	0	0	0	0	0	0	0	0	0	0	0	0	0
d334849ecfb5d3475bddd368a69db05d	ASV4561	Bacteria	Bacteroidota	Bacteroidia	Chitinophagales	Saprospiraceae	uncultured	NA	0	0	0	0	0	0	0	0	16	0	0	0	0	0	0	0	0	0	0	0	0	0	0	0	0	0	0	22	55	0	0	0	0	0	0	0	0	0	0	0	0
2ebd9adc6b9790b000f75c9609be5cbe	ASV376	Bacteria	Bacteroidota	Bacteroidia	Chitinophagales	Saprospiraceae	uncultured	NA	0	0	0	0	0	23	0	16	16	0	0	0	23	0	0	0	0	0	0	0	0	0	0	0	0	0	0	0	0	0	0	9	0	0	0	0	0	0	0	0	0
147c1cb658f71f4d9a8738e35c648e2d	ASV2119	Bacteria	Bacteroidota	Bacteroidia	Chitinophagales	Saprospiraceae	uncultured	NA	0	0	0	0	0	0	0	0	0	0	0	0	0	0	0	0	0	0	0	0	12	0	0	0	0	21	0	0	0	23	0	0	22	6	0	0	0	0	0	0	0
3d1c825e73f84e002702ee3437ab6c34	ASV475	Bacteria	Bacteroidota	Bacteroidia	Chitinophagales	uncultured	uncultured	uncultured_bacterium	0	0	0	0	0	0	0	0	0	0	33	0	0	0	0	0	0	0	0	0	0	0	0	0	0	0	0	0	0	0	0	0	8	24	0	0	0	0	0	0	0
7759a5642c1ff727c14645a9a7bb0033	ASV2777	Bacteria	Bacteroidota	Bacteroidia	Chitinophagales	Saprospiraceae	uncultured	NA	0	0	0	0	0	0	0	0	0	0	4	0	7	0	0	0	15	21	0	0	0	0	0	23	0	0	0	0	0	0	0	0	0	0	0	0	12	0	0	0	0
33bd09bb6ed8f8af1d54a27b4ea92e8d	ASV1537	Bacteria	Bacteroidota	Bacteroidia	Chitinophagales	Saprospiraceae	uncultured	NA	6	0	0	16	0	0	0	0	0	0	0	0	12	0	0	0	20	0	0	26	0	0	0	0	0	0	0	0	0	0	0	0	0	0	0	0	0	0	0	0	0
76c82f88b045344ecae908cc839a055b	ASV1875	Bacteria	Bacteroidota	Bacteroidia	Chitinophagales	Saprospiraceae	uncultured	NA	0	0	0	0	0	0	0	0	0	0	0	0	0	0	0	0	0	0	0	0	0	0	0	0	0	0	0	78	0	0	0	0	0	0	0	0	0	0	0	0	0
4e665702f7d28cc84ab31994579073af	ASV639	Bacteria	Bacteroidota	Bacteroidia	Chitinophagales	uncultured	uncultured	uncultured_Bacteroidetes	0	0	0	6	8	0	0	0	0	0	0	0	0	0	13	0	0	12	0	8	0	0	0	0	0	0	0	0	0	0	0	0	0	0	0	9	21	0	0	0	0
cba7f6e75eae541c7597c23d0e5b48a5	ASV4299	Bacteria	Bacteroidota	Bacteroidia	Chitinophagales	Saprospiraceae	uncultured	uncultured_Bacteroidetes	0	0	0	0	0	0	0	0	0	0	0	0	0	0	0	0	0	0	0	0	0	0	0	0	0	0	6	52	0	0	0	0	0	6	0	0	0	0	0	0	0
213da64d0fdb9b9febd9013b14b64149	ASV2152	Bacteria	Bacteroidota	Bacteroidia	Chitinophagales	Saprospiraceae	uncultured	NA	0	0	0	0	0	0	0	0	0	0	0	0	0	0	0	0	0	0	0	0	0	0	0	33	0	34	0	0	0	0	0	0	0	0	0	0	0	0	0	0	0
9f3de5ad9227c049b5d5d836be7b5002	ASV1338	Bacteria	Bacteroidota	Bacteroidia	Chitinophagales	Saprospiraceae	uncultured	uncultured_Flavobacterium	0	23	0	11	0	0	0	0	0	0	0	0	0	0	0	0	0	0	0	0	0	0	0	0	0	0	0	0	0	4	0	0	0	14	0	0	0	0	0	14	0
33cf7ac61084ccfc195695b983521d10	ASV1540	Bacteria	Bacteroidota	Bacteroidia	Chitinophagales	Saprospiraceae	uncultured	NA	0	0	0	0	0	0	0	0	0	0	0	0	0	0	0	0	0	0	0	0	0	0	0	0	0	20	0	17	15	0	0	0	13	0	0	0	0	0	0	0	0
bf3d4a7397cf3b0c7f78ebcf7925c93f	ASV4007	Bacteria	Bacteroidota	Bacteroidia	Chitinophagales	Saprospiraceae	uncultured	uncultured_Bacteroidetes	0	0	0	0	0	0	0	0	29	0	0	0	0	0	0	0	0	7	0	0	7	0	0	0	0	0	0	0	0	0	0	0	0	0	0	0	0	0	0	0	0
f000b46697f600cce5ea047f26693a78	ASV5078	Bacteria	Bacteroidota	Bacteroidia	Chitinophagales	uncultured	uncultured	uncultured_Bacteroidetes	0	0	0	0	0	0	0	22	0	0	0	0	0	19	0	0	0	0	0	22	0	0	0	0	0	0	0	0	0	0	0	0	0	0	0	0	0	0	0	0	0
3ac379955041bfb72c01895cb7736fbf	ASV423	Bacteria	Bacteroidota	Bacteroidia	Chitinophagales	uncultured	uncultured	uncultured_Bacteroidetes	0	0	0	0	40	0	0	0	0	0	0	0	0	11	0	0	0	0	9	0	0	0	0	0	0	0	0	0	0	0	0	0	0	0	0	0	0	0	0	0	0
f3d8eafccb7febdb542753e951ba031f	ASV5103	Bacteria	Bacteroidota	Bacteroidia	Chitinophagales	Saprospiraceae	uncultured	uncultured_bacterium	0	0	0	0	0	0	0	0	0	0	0	0	0	0	0	0	0	0	0	0	0	8	0	0	0	0	0	16	0	0	0	0	0	0	0	0	0	0	0	0	0
25dd15820c0972643cefad7756aa3895	ASV1475	Bacteria	Bacteroidota	Bacteroidia	Chitinophagales	Saprospiraceae	uncultured	uncultured_Bacteroidetes	0	0	0	0	0	0	0	0	0	0	0	0	0	6	0	0	0	0	0	0	0	6	0	0	0	0	0	12	0	0	0	0	0	0	0	0	0	0	0	0	0
421ddc3a1da4d2d055a4f015ec50a175	ASV2268	Bacteria	Bacteroidota	Bacteroidia	Chitinophagales	Saprospiraceae	uncultured	NA	0	0	0	0	0	0	0	0	0	0	0	0	0	0	0	0	0	42	0	0	0	0	0	0	0	0	0	0	0	0	0	16	0	0	0	0	0	0	0	0	0
61a730eebc588bfbfa1773ed29d913e0	ASV1735	Bacteria	Bacteroidota	Bacteroidia	Chitinophagales	uncultured	uncultured	uncultured_bacterium	0	6	0	0	0	0	0	12	6	0	7	0	0	0	0	0	0	0	0	4	0	0	0	0	0	0	0	0	0	0	0	0	0	11	0	0	12	0	0	0	0
6c62223191f9c81a6299ce97d1d2eb0c	ASV859	Bacteria	Bacteroidota	Bacteroidia	Chitinophagales	Saprospiraceae	uncultured	NA	0	0	0	0	0	0	0	0	0	0	0	0	0	0	0	0	0	0	0	34	0	0	0	0	0	0	0	0	0	0	0	0	0	0	0	0	0	0	0	23	0
02c37465ed0e06551503b4324789425f	ASV329	Bacteria	Bacteroidota	Bacteroidia	Chitinophagales	uncultured	uncultured	uncultured_bacterium	0	0	0	0	0	4	0	0	5	0	0	0	0	0	0	0	0	0	0	0	0	0	9	0	0	0	0	0	0	0	0	0	0	0	21	8	0	0	0	0	0
d3aefec0b41874120780dae77f83b6f2	ASV4420	Bacteria	Bacteroidota	Bacteroidia	Chitinophagales	uncultured	uncultured	uncultured_Bacteroidetes	0	0	30	0	0	0	0	0	0	0	0	0	0	0	0	0	0	0	0	0	0	0	0	0	0	0	24	0	0	0	0	0	0	0	0	0	0	0	0	0	0
1d82bd2358fcf02d1f3b9d878aae7610	ASV205	Bacteria	Bacteroidota	Bacteroidia	Chitinophagales	Saprospiraceae	uncultured	NA	0	0	0	0	0	0	0	0	0	0	0	0	0	16	0	0	0	15	0	0	9	0	0	0	0	0	0	0	0	0	0	0	0	0	0	0	12	0	0	0	0
7ecd073a049500faa2ed435ba08b12da	ASV1036	Bacteria	Bacteroidota	Bacteroidia	Chitinophagales	uncultured	uncultured	NA	0	0	8	0	0	0	0	0	0	0	0	7	12	14	0	0	0	0	0	0	0	0	0	0	0	0	0	0	0	0	0	0	6	0	0	0	0	0	4	0	0
4c2607fc66b0f814fe8482c1691f7956	ASV588	Bacteria	Bacteroidota	Bacteroidia	Chitinophagales	uncultured	uncultured	uncultured_Bacteroidetes	0	0	0	0	0	0	16	0	0	0	0	0	0	0	0	0	0	0	0	0	0	0	0	0	0	0	17	0	0	13	0	3	0	0	0	0	0	0	0	0	0
a4ad32fa89b139eba1e11a8ac97ebd9a	ASV3416	Bacteria	Bacteroidota	Bacteroidia	Chitinophagales	uncultured	uncultured	uncultured_Sphingobacteriales	0	0	0	0	0	0	0	0	0	0	33	0	0	0	0	0	0	0	0	0	0	0	16	0	0	0	0	0	0	0	0	0	0	0	0	0	0	0	0	0	0
ba223aaaa79e3734813a05d2f1a31270	ASV3903	Bacteria	Bacteroidota	Bacteroidia	Chitinophagales	Saprospiraceae	uncultured	uncultured_Bacteroidetes	0	0	0	0	0	0	0	14	0	0	0	0	0	0	0	0	0	0	0	0	0	0	0	0	0	0	11	0	0	8	0	0	0	0	0	0	0	0	16	0	0
07b8699a44489e5241fd47e95da70228	ASV975	Bacteria	Bacteroidota	Bacteroidia	Chitinophagales	Saprospiraceae	uncultured	NA	0	0	0	0	0	0	0	0	0	0	0	0	0	0	0	0	0	0	0	0	0	0	0	0	0	0	0	48	0	0	0	0	0	0	0	0	0	0	0	0	0
11b3ff4401cf9ed0ae0a303907923597	ASV1361	Bacteria	Bacteroidota	Bacteroidia	Chitinophagales	uncultured	uncultured	uncultured_bacterium	13	0	0	0	0	0	0	0	0	0	0	0	0	0	0	6	0	6	0	0	0	0	0	0	0	0	0	0	0	0	0	0	0	0	0	8	0	0	13	0	0
04c81e0a924db8a46b0d71d34bae7168	ASV584	Bacteria	Bacteroidota	Bacteroidia	Chitinophagales	uncultured	uncultured	uncultured_organism	0	0	0	0	0	0	0	0	0	0	0	0	0	0	0	0	0	0	0	10	0	0	0	0	0	0	0	0	0	0	0	0	0	0	0	16	19	0	0	0	0
7ff978e29492ecd0b55d3ebc81f8b8ea	ASV1065	Bacteria	Bacteroidota	Bacteroidia	Chitinophagales	uncultured	uncultured	uncultured_Bacteroidetes	0	0	20	0	0	0	0	0	0	0	0	0	0	0	0	0	0	0	0	0	0	0	13	7	0	0	0	0	0	0	0	0	0	0	0	0	0	0	0	0	0
1b195b728fbf7d455695a7f3c6f79e21	ASV161	Bacteria	Bacteroidota	Bacteroidia	Chitinophagales	uncultured	uncultured	uncultured_Bacteroidetes	0	5	0	0	0	0	0	0	0	0	0	0	9	0	8	0	0	5	0	0	0	0	0	0	4	0	0	0	0	0	0	0	0	0	0	0	0	8	0	0	0
7ae42d05ad24f482fa434b560b6c8c2c	ASV960	Bacteria	Bacteroidota	Bacteroidia	Chitinophagales	uncultured	uncultured	uncultured_Bacteroidetes	0	0	0	0	0	0	7	0	0	0	0	0	0	0	0	0	0	0	0	0	0	0	0	0	0	0	32	0	0	0	0	0	0	0	0	0	0	0	0	0	0
94a5eaf5ee6e1e76a92c78594588c3d5	ASV2036	Bacteria	Bacteroidota	Bacteroidia	Chitinophagales	uncultured	uncultured	uncultured_Bacteroidetes	9	0	0	0	0	0	0	0	0	0	0	0	0	0	0	0	0	0	0	0	30	0	0	0	0	0	0	0	0	0	0	0	0	0	0	0	0	0	0	0	0
9c3903753c9b6a160a41aaefbc7833d6	ASV1267	Bacteria	Bacteroidota	Bacteroidia	Chitinophagales	Saprospiraceae	uncultured	uncultured_Bacteroidetes	0	0	0	0	0	0	0	0	0	0	0	0	0	0	0	0	0	0	0	0	0	0	0	0	0	0	0	36	0	0	0	0	0	0	0	0	0	0	0	0	0
6eadcb1947c8132bb058dc5a7713f32f	ASV904	Bacteria	Bacteroidota	Bacteroidia	Chitinophagales	uncultured	uncultured	uncultured_bacterium	0	0	0	0	0	0	0	0	0	0	0	0	0	0	0	9	0	0	0	14	0	0	0	0	0	0	0	0	0	0	0	0	0	7	0	0	5	0	0	0	0
7846132f4fee688667901948f5353adf	ASV3257	Bacteria	Bacteroidota	Bacteroidia	Chitinophagales	uncultured	uncultured	uncultured_Bacteroidetes	0	0	0	0	0	0	0	0	0	0	0	0	0	0	0	0	0	0	0	0	0	0	0	0	0	0	0	0	0	0	0	0	0	0	0	0	0	35	0	0	0
e6eed3887fa1e5f90de2ac6ebb5af24a	ASV4792	Bacteria	Bacteroidota	Bacteroidia	Chitinophagales	Saprospiraceae	uncultured	NA	0	0	0	0	0	0	0	0	0	0	0	0	24	0	0	0	0	0	0	0	0	0	0	0	0	0	0	0	0	0	0	0	0	0	0	11	0	0	0	0	0
b69e83f7a975bba59fcd70345a2537b0	ASV3806	Bacteria	Bacteroidota	Bacteroidia	Chitinophagales	Saprospiraceae	uncultured	NA	0	0	0	0	0	0	0	0	0	0	0	0	0	0	0	0	17	0	0	0	0	0	0	0	0	0	0	0	0	0	0	0	0	0	0	17	0	0	0	0	0
eb0f67c122b5e7302890b2f09ffef29e	ASV4957	Bacteria	Bacteroidota	Bacteroidia	Chitinophagales	uncultured	uncultured	uncultured_Bacteroidetes	0	0	0	0	0	0	0	0	27	0	0	0	0	0	0	0	0	0	0	0	0	0	0	0	0	0	7	0	0	0	0	0	0	0	0	0	0	0	0	0	0
7af3a05c51d38b5070f30a770f6e8a0a	ASV962	Bacteria	Bacteroidota	Bacteroidia	Chitinophagales	uncultured	uncultured	uncultured_bacterium	0	0	0	0	0	0	0	3	0	0	3	0	0	0	0	0	0	0	0	0	9	0	0	0	0	8	0	0	0	0	0	0	0	0	0	0	5	0	5	0	0
8a6aab157ca5d4c4e4bb500ae55d1ce0	ASV1071	Bacteria	Bacteroidota	Bacteroidia	Chitinophagales	Saprospiraceae	uncultured	NA	0	0	0	0	0	0	0	0	0	0	0	0	0	0	0	0	0	0	0	0	0	0	0	0	0	0	0	0	0	0	0	0	0	0	33	0	0	0	0	0	0
4f5323029379d43ad82303839429c496	ASV669	Bacteria	Bacteroidota	Bacteroidia	Chitinophagales	Saprospiraceae	uncultured	uncultured_Bacteroidetes	0	0	0	0	0	0	0	0	0	0	0	0	0	0	0	0	0	0	0	0	0	0	0	0	0	32	0	0	0	0	0	0	0	0	0	0	0	0	0	0	0
593a33ed122de2c2224d9d2b93546e02	ASV2353	Bacteria	Bacteroidota	Bacteroidia	Chitinophagales	uncultured	uncultured	uncultured_Bacteroidetes	0	0	0	0	3	0	11	9	0	0	5	0	0	0	0	0	0	0	0	0	0	0	0	0	0	0	0	0	0	0	0	4	0	0	0	0	0	0	0	0	0
038eca6d924fd40916c98885dcce1003	ASV1575	Bacteria	Bacteroidota	Bacteroidia	Chitinophagales	uncultured	uncultured	uncultured_Sphingobacteriales	0	0	0	0	0	0	0	31	0	0	0	0	0	0	0	0	0	0	0	0	0	0	0	0	0	0	0	0	0	0	0	0	0	0	0	0	0	0	0	0	0
9180ee9a62509edb2f4ae1979a6dfa33	ASV2830	Bacteria	Bacteroidota	Bacteroidia	Chitinophagales	uncultured	uncultured	uncultured_Bacteroidetes	0	0	0	0	0	0	0	0	31	0	0	0	0	0	0	0	0	0	0	0	0	0	0	0	0	0	0	0	0	0	0	0	0	0	0	0	0	0	0	0	0
baa15acd600af36111d128f96b817b19	ASV3909	Bacteria	Bacteroidota	Bacteroidia	Chitinophagales	uncultured	uncultured	uncultured_Bacteroidetes	0	0	0	0	0	9	0	0	0	0	0	5	7	0	0	0	0	0	0	0	0	0	0	0	0	0	0	0	0	0	0	0	0	0	0	0	0	0	0	0	0
c53716420699c8542ac59e2a5891ed6b	ASV4260	Bacteria	Bacteroidota	Bacteroidia	Chitinophagales	Saprospiraceae	uncultured	NA	0	0	0	6	0	0	0	0	0	0	0	0	0	0	0	0	15	0	0	0	0	0	0	9	0	0	0	0	0	0	0	0	0	0	0	0	0	0	0	0	0
2a02cb4485b0680cb88940a4a1c4fb98	ASV278	Bacteria	Bacteroidota	Bacteroidia	Chitinophagales	uncultured	uncultured	NA	0	0	29	0	0	0	0	0	0	0	0	0	0	0	0	0	0	0	0	0	0	0	0	0	0	0	0	0	0	0	0	0	0	0	0	0	0	0	0	0	0
b667c52873a8bb2eafdd2bd218fe712b	ASV3841	Bacteria	Bacteroidota	Bacteroidia	Chitinophagales	Saprospiraceae	uncultured	NA	0	0	0	0	0	0	19	0	10	0	0	0	0	0	0	0	0	0	0	0	0	0	0	0	0	0	0	0	0	0	0	0	0	0	0	0	0	0	0	0	0
521c114d37c4e7c15b1ee635f32d6ea8	ASV2316	Bacteria	Bacteroidota	Bacteroidia	Chitinophagales	uncultured	uncultured	uncultured_Bacteroidetes	0	0	0	0	7	0	0	0	0	0	0	0	0	0	0	0	0	0	0	0	0	0	0	0	0	3	0	0	0	0	0	0	0	0	0	0	0	0	0	0	0
c99f37ddf7bb01ff3e10df7c39af0e70	ASV4171	Bacteria	Bacteroidota	Bacteroidia	Chitinophagales	uncultured	uncultured	uncultured_Bacteroidetes	0	0	0	0	0	0	0	0	0	0	0	0	0	0	0	0	0	0	0	0	0	0	0	0	0	0	0	0	0	0	8	0	0	0	0	0	0	0	20	0	0
5bfc7c76d86d55478112ade820f114eb	ASV715	Bacteria	Bacteroidota	Bacteroidia	Chitinophagales	uncultured	uncultured	uncultured_Bacteroidetes	0	0	0	0	0	0	0	0	0	0	0	27	0	0	0	0	0	0	0	0	0	0	0	0	0	0	0	0	0	0	0	0	0	0	0	0	0	0	0	0	0
b73295562ecc0e1670b79f5f454d5564	ASV3890	Bacteria	Bacteroidota	Bacteroidia	Chitinophagales	uncultured	uncultured	uncultured_Bacteroidetes	0	0	0	0	0	0	0	0	0	0	0	0	0	8	19	0	0	0	0	0	0	0	0	0	0	0	0	0	0	0	0	0	0	0	0	0	0	0	0	0	0
4ac2b88a0bb47ad8513f40fff1945d79	ASV547	Bacteria	Bacteroidota	Bacteroidia	Chitinophagales	Saprospiraceae	uncultured	NA	6	0	0	0	0	0	5	0	0	8	0	0	0	0	0	0	0	0	0	0	0	0	0	0	6	0	0	0	0	0	0	0	0	0	0	0	0	0	0	0	0
83c6c467a4d0c8f20e16bbc1a99674c9	ASV1934	Bacteria	Bacteroidota	Bacteroidia	Chitinophagales	uncultured	uncultured	uncultured_bacterium	8	0	0	0	0	4	0	0	3	0	0	0	0	0	0	5	0	0	0	0	0	0	0	0	0	0	0	0	0	0	0	0	0	0	0	5	0	0	0	0	0
91a24613fe3859f79a8deb1d9cfc4c1b	ASV2011	Bacteria	Bacteroidota	Bacteroidia	Chitinophagales	Saprospiraceae	uncultured	NA	0	0	0	0	0	0	0	24	0	0	0	0	0	0	0	0	0	0	0	0	0	0	0	0	0	0	0	0	0	0	0	0	0	0	0	0	0	0	0	0	0
a954501f2cb1d105c37be5d28eca2f28	ASV3561	Bacteria	Bacteroidota	Bacteroidia	Chitinophagales	uncultured	uncultured	uncultured_Bacteroidetes	0	0	0	0	0	0	0	0	0	0	0	0	0	0	0	0	0	0	0	0	0	0	0	0	0	0	0	0	0	0	0	0	0	0	0	0	0	0	24	0	0
073ee0bf57464b07de6078163648be29	ASV1855	Bacteria	Bacteroidota	Bacteroidia	Chitinophagales	uncultured	uncultured	NA	0	0	0	0	0	0	0	0	0	0	13	0	0	0	0	0	0	0	0	0	0	0	0	0	0	0	0	0	4	0	0	5	0	0	0	0	0	0	0	0	0
0b6da834717dda4ae980272887f6266d	ASV28	Bacteria	Bacteroidota	Bacteroidia	Chitinophagales	Saprospiraceae	uncultured	uncultured_bacterium	0	0	0	0	0	0	0	0	0	0	0	0	0	0	0	0	0	0	0	0	0	0	0	22	0	0	0	0	0	0	0	0	0	0	0	0	0	0	0	0	0
125d223d01e6c50190771c41f1643a23	ASV2110	Bacteria	Bacteroidota	Bacteroidia	Chitinophagales	Saprospiraceae	uncultured	NA	0	0	0	0	0	0	0	0	0	0	0	0	0	0	0	0	0	0	0	0	0	0	0	0	0	0	0	0	0	0	0	0	0	22	0	0	0	0	0	0	0
1334ed126b7d4c6a51e8d1d16abddfac	ASV2568	Bacteria	Bacteroidota	Bacteroidia	Chitinophagales	uncultured	uncultured	uncultured_Bacteroidetes	22	0	0	0	0	0	0	0	0	0	0	0	0	0	0	0	0	0	0	0	0	0	0	0	0	0	0	0	0	0	0	0	0	0	0	0	0	0	0	0	0
4443fe0c797dbe9921e051035a3baa19	ASV2669	Bacteria	Bacteroidota	Bacteroidia	Chitinophagales	Saprospiraceae	uncultured	uncultured_Bacteroidetes	0	0	0	0	0	0	0	0	0	0	0	0	0	0	0	0	0	0	0	0	0	0	0	0	0	22	0	0	0	0	0	0	0	0	0	0	0	0	0	0	0
ee95f57da14e9bc69c829b5423fefdff	ASV5032	Bacteria	Bacteroidota	Bacteroidia	Chitinophagales	Saprospiraceae	uncultured	uncultured_bacterium	0	0	0	0	0	0	0	0	0	22	0	0	0	0	0	0	0	0	0	0	0	0	0	0	0	0	0	0	0	0	0	0	0	0	0	0	0	0	0	0	0
fa99d9932ebf54dc59ed46631c16e1a9	ASV5281	Bacteria	Bacteroidota	Bacteroidia	Chitinophagales	Saprospiraceae	uncultured	uncultured_bacterium	0	0	0	0	0	0	0	0	0	0	0	0	0	0	0	0	0	0	0	0	0	0	0	0	0	10	0	12	0	0	0	0	0	0	0	0	0	0	0	0	0
858df23ba280e2f76869a8e0b1a27a0e	ASV2490	Bacteria	Bacteroidota	Bacteroidia	Chitinophagales	uncultured	uncultured	NA	0	0	0	0	0	5	0	0	0	0	0	0	0	0	0	0	0	0	0	0	0	0	4	0	0	0	0	0	0	0	0	0	0	0	0	0	12	0	0	0	0
957d4f1b28909b0a3457a9b719feae3b	ASV2542	Bacteria	Bacteroidota	Bacteroidia	Chitinophagales	uncultured	uncultured	uncultured_Bacteroidetes	0	0	0	0	0	0	0	0	0	21	0	0	0	0	0	0	0	0	0	0	0	0	0	0	0	0	0	0	0	0	0	0	0	0	0	0	0	0	0	0	0
2b94977492086c6eeb275353fcc5a2d6	ASV313	Bacteria	Bacteroidota	Bacteroidia	Chitinophagales	Saprospiraceae	uncultured	uncultured_Bacteroidetes	0	0	0	0	0	0	0	10	10	0	0	0	0	0	0	0	0	0	0	0	0	0	0	0	0	0	0	0	0	0	0	0	0	0	0	0	0	0	0	0	0
3fb32086342d7af9387a885c96af36b6	ASV532	Bacteria	Bacteroidota	Bacteroidia	Chitinophagales	Saprospiraceae	uncultured	NA	0	0	0	0	0	0	0	0	0	0	0	0	0	0	0	0	0	20	0	0	0	0	0	0	0	0	0	0	0	0	0	0	0	0	0	0	0	0	0	0	0
60598fd50ba8eb82376e7c1ba0a85da0	ASV2980	Bacteria	Bacteroidota	Bacteroidia	Chitinophagales	Saprospiraceae	uncultured	NA	0	0	0	0	0	0	0	0	0	0	0	0	0	0	0	0	0	0	0	20	0	0	0	0	0	0	0	0	0	0	0	0	0	0	0	0	0	0	0	0	0
6f083eca9e78a6dd08d011ae43b6def4	ASV922	Bacteria	Bacteroidota	Bacteroidia	Chitinophagales	Saprospiraceae	uncultured	uncultured_bacterium	0	0	0	0	0	0	0	0	0	0	0	0	0	0	0	0	0	0	0	0	0	0	0	0	0	0	0	0	0	0	3	0	0	0	0	0	14	0	3	0	0
afb5688d729548aa5eb807778ec0903d	ASV3690	Bacteria	Bacteroidota	Bacteroidia	Chitinophagales	Saprospiraceae	uncultured	NA	0	0	0	0	0	0	6	0	0	0	0	0	0	0	0	0	0	0	0	0	0	0	0	0	0	0	0	0	0	0	0	8	0	0	0	0	0	0	6	0	0
c48d1e323f42ec30b997c59f094b3941	ASV4141	Bacteria	Bacteroidota	Bacteroidia	Chitinophagales	uncultured	uncultured	uncultured_bacterium	0	0	0	0	0	0	0	0	0	0	0	0	0	0	0	0	0	20	0	0	0	0	0	0	0	0	0	0	0	0	0	0	0	0	0	0	0	0	0	0	0
774f1ce216b5c91c74efe9d29116a843	ASV2457	Bacteria	Verrucomicrobiota	Chlamydiae	Chlamydiales	Simkaniaceae	Candidatus_Fritschea	NA	17	0	0	0	0	0	0	0	0	0	0	0	10	23	15	0	31	24	0	18	35	0	16	13	15	16	0	7	0	0	0	7	0	0	8	0	24	0	0	0	0
83147bf85c86c1a6aafb292e89a4cb05	ASV3019	Bacteria	Verrucomicrobiota	Chlamydiae	Chlamydiales	Simkaniaceae	Candidatus_Fritschea	Candidatus_Syngnamydia	0	0	17	0	26	0	0	0	0	0	0	0	0	0	0	0	27	0	0	0	0	0	0	0	0	0	0	0	0	0	0	0	0	0	0	0	0	0	0	0	0
e30b7b8db4ab7e0ecb66d85eeab6f249	ASV4832	Bacteria	Verrucomicrobiota	Chlamydiae	Chlamydiales	Simkaniaceae	Candidatus_Fritschea	Candidatus_Neptunochlamydia	0	0	0	0	0	0	0	0	0	0	0	0	6	0	0	0	6	5	0	8	18	0	0	0	0	0	0	0	0	0	4	0	0	0	0	0	14	5	0	0	0
7726d18d352bc6b8a05077a8be163ba3	ASV2776	Bacteria	Verrucomicrobiota	Chlamydiae	Chlamydiales	Simkaniaceae	Candidatus_Fritschea	Candidatus_Syngnamydia	0	0	0	0	0	19	0	0	0	0	0	0	0	0	0	18	0	0	0	0	0	0	0	0	0	0	0	0	0	0	0	0	0	0	0	0	0	0	0	0	0
f7412359bc7e1adf283865b7d06397b6	ASV5262	Bacteria	Verrucomicrobiota	Chlamydiae	Chlamydiales	Simkaniaceae	Candidatus_Fritschea	Candidatus_Syngnamydia	0	0	0	0	0	0	0	0	0	0	0	0	0	0	0	0	0	0	13	0	0	0	0	0	0	0	0	0	0	0	0	11	0	0	0	0	0	0	0	0	0
b8ec96dce26d7a9dfefe716797e8d333	ASV3762	Bacteria	Verrucomicrobiota	Chlamydiae	Chlamydiales	Chlamydiaceae	Chlamydiaceae	uncultured_Chlamydiales	0	4	0	12	12	11	0	0	2	0	0	17	0	7	0	0	8	6	0	8	4	0	0	0	0	0	4	0	2	0	0	0	0	0	0	4	0	9	0	0	0
bcf28a6b678ee69327e74be2e56ade36	ASV3960	Bacteria	Verrucomicrobiota	Chlamydiae	Chlamydiales	Chlamydiaceae	Chlamydiaceae	uncultured_Chlamydiales	0	0	0	0	8	0	0	0	0	0	0	0	0	0	0	0	0	0	0	0	0	0	0	26	0	0	0	0	0	0	0	0	0	0	0	0	0	0	0	0	0
cf330c0421134befbf3ba205308a9e86	ASV4385	Bacteria	Verrucomicrobiota	Chlamydiae	Chlamydiales	Criblamydiaceae	Criblamydiaceae	uncultured_organism	32	28	14	16	41	19	12	0	7	0	0	29	13	16	0	17	26	15	0	34	26	18	24	0	13	0	4	0	0	0	9	8	18	0	7	15	35	18	0	0	14
09b478699451da39cd125dfbfa38ff6b	ASV1246	Bacteria	Verrucomicrobiota	Chlamydiae	Chlamydiales	Criblamydiaceae	Criblamydiaceae	uncultured_organism	0	0	7	0	0	0	0	0	0	0	0	27	0	0	0	0	0	0	0	4	0	0	10	0	0	0	0	0	0	0	0	0	0	0	0	0	0	0	0	0	0
12168202ca1fa29b404e89cfad34b096	ASV3278	Bacteria	Verrucomicrobiota	Chlamydiae	Chlamydiales	Criblamydiaceae	Criblamydiaceae	uncultured_organism	5	0	0	0	0	0	0	0	0	0	0	0	0	0	0	23	0	0	0	0	0	0	0	0	0	0	0	0	0	0	0	0	0	0	0	0	0	0	0	0	0
1015a097685733c380c208b3e201d831	ASV2559	Bacteria	Verrucomicrobiota	Chlamydiae	Chlamydiales	NA	NA	NA	24	40	36	0	52	22	0	0	0	0	0	20	0	17	5	12	28	0	0	14	15	0	6	29	11	0	0	0	0	0	29	0	0	0	11	12	22	31	0	6	20
dedcbc82a5acb93e5c2d271464c676c2	ASV4684	Bacteria	Verrucomicrobiota	Chlamydiae	Chlamydiales	NA	NA	NA	0	5	0	30	0	8	0	0	6	0	0	9	0	0	0	11	0	0	0	11	0	10	25	0	11	0	0	0	0	0	26	0	0	0	0	16	14	0	0	8	16
9bfc21b21072fe3f537fc7dba0d78f46	ASV1255	Bacteria	Verrucomicrobiota	Chlamydiae	Chlamydiales	NA	NA	NA	0	27	0	0	0	0	0	0	0	0	0	0	8	0	33	0	0	0	63	0	0	0	0	0	0	0	0	0	0	0	28	0	0	0	0	0	0	0	0	0	0
a0e43bfcd6aafc2d55d5f34e1ae4a4e1	ASV3392	Bacteria	Verrucomicrobiota	Chlamydiae	Chlamydiales	Parachlamydiaceae	NA	NA	0	13	0	0	0	0	0	0	0	3	0	0	0	0	0	0	0	0	0	0	3	0	0	0	0	0	0	11	0	0	0	32	0	0	0	0	0	0	0	0	0
6890f635b554404e464bf5f845e5e8ba	ASV2748	Bacteria	Verrucomicrobiota	Chlamydiae	Chlamydiales	Parachlamydiaceae	NA	NA	0	0	0	0	0	0	0	0	4	0	0	0	0	0	0	0	0	0	3	0	0	0	0	0	0	12	0	0	10	0	0	0	0	10	0	0	0	0	11	6	0
97b5d37970da914c4a5f024c0abb8fea	ASV2058	Bacteria	Verrucomicrobiota	Chlamydiae	Chlamydiales	Parachlamydiaceae	NA	NA	0	0	0	0	0	21	0	0	0	0	0	11	0	0	0	0	0	0	0	0	0	0	0	0	0	0	3	0	0	0	0	0	0	0	0	0	0	0	0	5	0
79d1d1fbc9699831cd19bce61e9ee203	ASV1900	Bacteria	Verrucomicrobiota	Chlamydiae	Chlamydiales	NA	NA	NA	0	0	3	0	8	0	0	0	0	0	0	0	0	0	0	0	4	6	0	0	0	0	2	0	0	0	0	0	0	0	5	0	0	0	0	7	11	5	0	0	0
f65afcf26ebc04d9d776c636d707679d	ASV5187	Bacteria	Verrucomicrobiota	Chlamydiae	Chlamydiales	NA	NA	NA	0	2	0	0	0	0	0	0	0	0	0	0	0	0	0	3	0	0	0	10	0	9	7	0	0	4	0	0	0	0	0	0	0	0	0	0	7	4	0	0	0
bb1124af5d8b4a7fb31ef764d0e2388b	ASV3926	Bacteria	Verrucomicrobiota	Chlamydiae	Chlamydiales	Parachlamydiaceae	NA	NA	0	0	4	0	0	0	0	0	0	0	0	0	0	0	6	0	0	5	0	0	0	0	0	0	0	0	0	0	0	0	0	0	0	0	0	0	3	0	0	3	0
f93fdbb51f4675bc8bffcebb2386bca4	ASV5199	Bacteria	Verrucomicrobiota	Chlamydiae	Chlamydiales	Chlamydiaceae	NA	NA	0	0	0	0	0	0	0	0	0	0	0	8	0	0	0	0	0	0	0	0	11	5	0	0	0	0	0	0	0	0	0	0	0	0	0	5	0	0	0	0	3
dff67ed4953e3a6ad32788fbedee2e55	ASV4716	Bacteria	Verrucomicrobiota	Chlamydiae	Chlamydiales	Parachlamydiaceae	NA	NA	0	0	0	0	0	0	0	0	0	0	0	0	0	0	0	0	0	0	0	0	0	0	0	0	0	0	0	0	0	0	0	0	0	0	0	0	0	0	27	0	0
aaba74bd6897275757d3e039adfbc0a1	ASV3590	Bacteria	Verrucomicrobiota	Chlamydiae	Chlamydiales	NA	NA	NA	0	0	0	0	0	0	0	0	0	0	0	0	0	0	0	0	0	0	0	0	0	18	6	0	0	0	0	0	0	0	0	0	0	0	0	0	0	0	0	0	0
e35c3922dfe4ba5b9e377f5a967aef51	ASV4836	Bacteria	Verrucomicrobiota	Chlamydiae	Chlamydiales	NA	NA	NA	0	0	0	0	0	0	0	0	0	0	0	0	0	0	0	0	0	0	0	0	0	0	11	0	0	0	0	0	0	0	0	0	0	0	0	0	13	0	0	0	0
d4f1281461ae0ee93399c3bc14b5dc47	ASV4437	Bacteria	Verrucomicrobiota	Chlamydiae	Chlamydiales	Parachlamydiaceae	NA	NA	0	0	0	0	0	0	0	6	0	6	0	0	0	0	0	0	0	0	0	0	0	0	0	0	0	0	0	0	0	0	0	8	0	0	0	0	0	0	0	0	0
7faacad8c52adc3507a0b113044d9224	ASV1051	Bacteria	Verrucomicrobiota	Chlamydiae	Chlamydiales	Parachlamydiaceae	Neochlamydia	NA	0	0	0	0	0	0	0	0	0	0	0	15	7	0	0	0	8	0	0	0	0	0	0	0	4	0	0	0	0	0	0	0	0	0	0	0	0	0	0	0	0
75a36213d7ac8623064eaa47dbbe52f8	ASV1866	Bacteria	Verrucomicrobiota	Chlamydiae	Chlamydiales	Simkaniaceae	Simkania	Simkania_negevensis	0	0	0	10	0	0	0	0	0	0	0	0	0	0	0	0	0	13	0	33	0	0	0	0	0	0	0	0	0	0	20	0	0	0	0	0	0	277	0	0	0
c88b0afdb4c096dc44a4dc8e1de89a6d	ASV4164	Bacteria	Verrucomicrobiota	Chlamydiae	Chlamydiales	Simkaniaceae	Simkania	Simkania_negevensis	7	0	0	0	24	0	0	0	0	0	0	0	0	0	0	0	10	0	0	0	0	0	0	0	0	0	0	0	0	0	0	0	0	0	0	0	0	0	0	0	0
4da1dafdf6ebcb50588bd7a4c3154334	ASV617	Bacteria	Verrucomicrobiota	Chlamydiae	Chlamydiales	Chlamydiaceae	uncultured	uncultured_organism	21	34	7	15	0	31	0	0	0	0	0	0	17	31	12	18	0	36	0	56	23	0	12	56	0	0	0	8	0	0	23	13	0	0	0	54	26	43	0	0	15
bb40862d2b2689c47699d160217bec8e	ASV3927	Bacteria	Verrucomicrobiota	Chlamydiae	Chlamydiales	Simkaniaceae	uncultured	NA	26	14	26	17	32	0	0	0	0	0	0	34	0	21	8	10	15	27	6	22	27	25	22	14	25	0	0	0	0	0	21	0	0	0	0	0	28	7	14	17	9
82adf61454c6cf04880e3d53e056ef47	ASV1924	Bacteria	Verrucomicrobiota	Chlamydiae	Chlamydiales	Chlamydiaceae	uncultured	uncultured_organism	0	0	49	0	0	0	0	0	0	0	0	0	0	50	0	21	37	20	0	37	0	18	24	15	11	0	0	0	0	0	37	0	0	0	26	31	0	41	0	0	0
f787c320a8021680523c7ff539040bb8	ASV5224	Bacteria	Verrucomicrobiota	Chlamydiae	Chlamydiales	Simkaniaceae	uncultured	NA	0	0	0	0	0	0	0	0	0	0	0	0	0	0	0	0	0	0	0	0	0	0	0	0	0	0	0	37	0	302	0	0	0	0	0	0	0	0	13	0	0
708ad29ab1b92c36f6546168e05eaeb1	ASV2421	Bacteria	Verrucomicrobiota	Chlamydiae	Chlamydiales	Simkaniaceae	uncultured	Chlamydiales_bacterium	0	8	13	0	0	10	13	16	12	5	6	7	0	5	0	0	3	0	9	35	0	0	0	0	0	21	11	5	13	0	0	15	37	32	0	8	14	0	27	9	7
2c4f240202ce6f74f5dfc7cd98bd8ac7	ASV322	Bacteria	Verrucomicrobiota	Chlamydiae	Chlamydiales	Chlamydiaceae	uncultured	uncultured_bacterium	17	6	0	5	16	0	0	0	0	0	0	0	0	0	0	0	0	13	0	9	0	0	23	0	0	0	0	0	0	0	25	0	0	0	9	25	67	0	0	7	20
9b0da875dc4f8e719cc4c91c56d816b6	ASV1233	Bacteria	Verrucomicrobiota	Chlamydiae	Chlamydiales	Chlamydiaceae	uncultured	uncultured_organism	0	43	0	0	39	18	0	0	0	0	0	16	7	0	8	0	0	0	12	0	0	0	0	0	0	0	0	0	0	0	0	0	0	0	0	0	22	0	0	0	0
6b9e7af09efbc75b6f5267ddc2051dbf	ASV832	Bacteria	Verrucomicrobiota	Chlamydiae	Chlamydiales	Simkaniaceae	uncultured	NA	0	14	7	0	25	0	0	5	0	0	0	0	0	0	0	7	0	0	0	0	0	4	12	13	9	0	0	0	0	0	16	0	0	2	10	26	8	0	0	0	0
3292ac4f610bbcaf34d5724b040002af	ASV2638	Bacteria	Verrucomicrobiota	Chlamydiae	Chlamydiales	Simkaniaceae	uncultured	NA	0	0	21	0	27	8	0	0	0	0	0	11	0	21	0	0	11	13	0	0	0	8	14	5	0	0	0	0	0	0	6	0	0	0	0	0	0	0	0	0	0
6e479bc3009f137148d943be3d4db3fb	ASV897	Bacteria	Verrucomicrobiota	Chlamydiae	Chlamydiales	Chlamydiaceae	uncultured	uncultured_bacterium	0	0	0	0	0	0	0	0	0	0	4	13	0	0	0	0	0	0	0	0	0	0	19	41	0	0	9	0	0	0	0	6	0	0	0	0	0	12	7	0	0
f5f3fe7efd4bfd62667980d8c7a9a11c	ASV5118	Bacteria	Verrucomicrobiota	Chlamydiae	Chlamydiales	Chlamydiaceae	uncultured	uncultured_bacterium	26	0	0	0	0	0	0	0	0	0	0	0	0	0	0	37	0	0	0	0	5	0	0	0	0	0	0	0	0	0	0	0	0	0	0	0	11	28	0	0	0
9b4df83fa4dacc6d6801dabe543cb133	ASV1237	Bacteria	Verrucomicrobiota	Chlamydiae	Chlamydiales	Chlamydiaceae	uncultured	uncultured_bacterium	0	0	66	0	0	0	0	0	0	0	7	0	0	0	0	0	0	0	0	0	0	0	0	18	0	0	4	0	0	0	0	0	0	0	0	0	0	0	0	0	0
bab153c729d483e0d8ac8365f84837e5	ASV3912	Bacteria	Verrucomicrobiota	Chlamydiae	Chlamydiales	Chlamydiaceae	uncultured	uncultured_bacterium	0	0	0	0	0	0	0	0	0	0	0	0	4	0	8	0	0	0	0	0	0	0	0	18	0	0	0	0	0	0	0	0	0	0	0	32	0	0	0	0	0
d3dcb7db3d4f077d9d730a6d15385ce6	ASV4426	Bacteria	Verrucomicrobiota	Chlamydiae	Chlamydiales	Chlamydiaceae	uncultured	uncultured_organism	0	0	0	0	0	0	0	0	12	3	0	0	0	0	0	0	0	0	10	0	0	0	0	0	0	5	0	0	0	0	0	6	7	16	0	0	0	0	0	0	0
647344adf4d89c782e91fb75086c4e89	ASV3152	Bacteria	Verrucomicrobiota	Chlamydiae	Chlamydiales	Chlamydiaceae	uncultured	uncultured_organism	27	0	0	0	0	0	0	0	0	0	0	0	0	0	0	10	0	7	0	0	0	0	0	0	0	0	0	0	0	0	0	0	0	0	0	0	12	0	0	0	0
fbdb8156ef333df04fbbe473e74ddeb9	ASV5316	Bacteria	Verrucomicrobiota	Chlamydiae	Chlamydiales	Simkaniaceae	uncultured	NA	0	0	0	0	0	0	0	0	0	0	27	0	0	0	0	0	0	0	0	0	0	0	0	0	0	0	0	0	0	0	0	0	0	0	0	0	0	0	28	0	0
2c73a18b2d6a894642f2c0c6ac5bc413	ASV328	Bacteria	Verrucomicrobiota	Chlamydiae	Chlamydiales	Chlamydiaceae	uncultured	uncultured_bacterium	0	0	0	0	0	0	0	0	0	0	0	0	0	0	0	0	0	0	0	0	0	0	0	0	0	0	0	0	0	0	0	0	0	0	0	53	0	0	0	0	0
6d8a6803586a5d7bbd9ac8fb8a2ce279	ASV872	Bacteria	Verrucomicrobiota	Chlamydiae	Chlamydiales	Chlamydiaceae	uncultured	uncultured_organism	3	0	0	17	0	0	0	0	0	0	0	0	4	5	10	0	8	0	0	0	0	0	3	0	0	0	0	0	0	0	0	0	0	0	0	0	0	0	0	0	0
ee93b648b2b5a68dcc5fa595b0b2068b	ASV5031	Bacteria	Verrucomicrobiota	Chlamydiae	Chlamydiales	Simkaniaceae	uncultured	uncultured_bacterium	4	0	0	0	0	0	0	0	0	0	0	0	0	0	0	0	0	0	0	15	11	0	0	0	0	0	0	0	0	0	0	0	0	0	0	5	5	0	0	0	0
ac4c2914810d17e5b602127a740e403f	ASV3618	Bacteria	Verrucomicrobiota	Chlamydiae	Chlamydiales	Simkaniaceae	uncultured	metagenome	0	0	0	0	0	0	0	0	0	0	0	0	0	0	0	0	0	0	0	0	0	0	0	0	0	0	0	0	0	10	0	29	0	0	0	0	0	0	0	0	0
2a1674e17fdcdcb23a65627490923e47	ASV284	Bacteria	Verrucomicrobiota	Chlamydiae	Chlamydiales	Simkaniaceae	uncultured	uncultured_bacterium	0	0	0	0	0	0	0	0	0	0	0	0	0	0	0	0	0	0	0	0	0	0	0	0	0	0	0	0	0	0	0	0	0	0	0	0	0	0	0	38	0
cc048984a24459e0c894fa7e9001f1e5	ASV4320	Bacteria	Verrucomicrobiota	Chlamydiae	Chlamydiales	Chlamydiaceae	uncultured	uncultured_bacterium	0	0	0	0	0	30	0	0	0	4	0	0	0	0	0	0	0	0	0	0	4	0	0	0	0	0	0	0	0	0	0	0	0	0	0	0	0	0	0	0	0
285b8a6185796bfe75482b2174ecfd52	ASV2182	Bacteria	Verrucomicrobiota	Chlamydiae	Chlamydiales	Chlamydiaceae	uncultured	uncultured_organism	0	0	0	0	0	0	5	0	0	0	0	0	0	0	0	0	9	0	0	0	0	0	0	0	0	0	0	0	0	0	0	0	0	7	0	0	0	0	15	0	0
08ead8fa946431265485431251bd3bf1	ASV1177	Bacteria	Verrucomicrobiota	Chlamydiae	Chlamydiales	Chlamydiaceae	uncultured	NA	0	0	0	4	16	0	0	0	0	0	0	0	0	0	0	4	0	0	0	0	0	0	0	0	0	0	0	0	0	0	0	0	0	0	0	0	7	0	0	0	0
6c3581d1fbbac6ef565cb36b026d22e2	ASV856	Bacteria	Verrucomicrobiota	Chlamydiae	Chlamydiales	Chlamydiaceae	uncultured	uncultured_bacterium	0	0	0	0	0	0	0	0	0	0	0	0	0	0	16	0	0	0	0	0	0	0	0	0	0	0	0	0	0	0	0	0	0	0	0	0	0	12	0	0	0
a3f8708d7e78546dbc62cd37f06779ff	ASV3413	Bacteria	Verrucomicrobiota	Chlamydiae	Chlamydiales	Chlamydiaceae	uncultured	uncultured_bacterium	0	0	0	0	0	0	4	0	0	0	0	0	0	0	0	0	0	0	0	0	0	0	0	0	0	0	0	3	0	0	0	0	5	0	0	12	0	0	0	0	4
9595315b24e8a0ea267446c92f842bb9	ASV3274	Bacteria	Verrucomicrobiota	Chlamydiae	Chlamydiales	Simkaniaceae	uncultured	uncultured_Chlamydia	0	0	14	0	0	0	0	0	0	0	0	0	0	0	0	0	0	0	0	0	0	0	0	0	0	0	0	0	0	0	0	0	0	0	0	0	0	0	0	11	0
2b10aed569ed0f1d23507e65fe58b6a1	ASV302	Bacteria	Verrucomicrobiota	Chlamydiae	Chlamydiales	Chlamydiaceae	uncultured	uncultured_organism	0	0	0	0	12	0	0	0	0	0	0	0	0	0	0	0	0	0	0	0	0	0	0	0	0	0	0	0	0	0	11	0	0	0	0	0	0	0	0	0	0
649368e6e9111ed522f06c2774f99136	ASV3153	Bacteria	Verrucomicrobiota	Chlamydiae	Chlamydiales	Chlamydiaceae	uncultured	metagenome	0	0	0	0	0	0	0	0	0	0	0	0	0	0	0	0	0	0	0	0	21	0	0	0	0	0	0	0	0	0	0	0	0	0	0	0	0	0	0	0	0
19810dc74feed050dbac605266d47635	ASV2893	Bacteria	Verrucomicrobiota	Chlamydiae	Chlamydiales	Waddliaceae	Waddlia	uncultured_bacterium	0	23	123	33	38	49	0	0	0	0	0	118	0	66	0	0	17	25	33	59	0	30	67	7	16	0	0	0	0	0	37	0	0	0	0	6	0	0	0	8	3
18778f82f16c4bbf08344efb0e770f78	ASV2890	Bacteria	Proteobacteria	Gammaproteobacteria	Chromatiales	Chromatiaceae	Candidatus_Thiobios	NA	0	0	0	0	0	0	0	0	0	0	0	38	0	0	0	0	0	0	0	0	0	0	0	0	0	0	0	0	0	0	0	0	0	0	0	0	0	0	0	0	0
0dd35440662fbe8b16b9f69097d48ece	ASV77	Bacteria	Proteobacteria	Gammaproteobacteria	Chromatiales	Chromatiaceae	Candidatus_Thiobios	NA	0	0	0	0	0	0	0	0	0	0	0	0	0	0	0	0	0	0	24	0	0	0	0	0	0	0	0	0	0	0	0	0	0	0	0	0	0	0	0	0	0
13a49cc94aee37c2439fb30019ebb1ac	ASV1383	Bacteria	Proteobacteria	Gammaproteobacteria	Chromatiales	Sedimenticolaceae	uncultured	uncultured_gamma	0	0	0	0	0	0	10	0	0	0	0	0	0	0	0	0	0	0	68	0	0	0	0	0	0	0	0	0	0	0	0	0	0	0	0	0	0	0	0	0	0
f8d9cc6d988905f8c8637e2fdc3207cd	ASV5148	Bacteria	Firmicutes	Clostridia	Clostridia_vadinBB60_group	Clostridia_vadinBB60_group	Clostridia_vadinBB60_group	uncultured_bacterium	0	0	0	0	0	0	0	0	0	0	0	0	0	27	0	0	0	0	0	0	0	0	0	0	0	0	0	0	0	0	0	0	0	0	0	0	0	0	0	0	0
cd629834bcbc96d91222bbf45037fede	ASV4340	Bacteria	Firmicutes	Clostridia	Clostridia_vadinBB60_group	Clostridia_vadinBB60_group	Clostridia_vadinBB60_group	uncultured_bacterium	0	0	0	0	0	0	9	0	0	0	0	0	0	0	0	0	0	0	0	0	0	0	0	0	0	0	0	0	0	0	0	13	3	0	0	0	0	0	0	0	0
29c50a6e42ff015970844f54041b7b7f	ASV1506	Bacteria	Firmicutes	Clostridia	Clostridiales	Clostridiaceae	Oceanirhabdus	NA	0	0	0	0	0	0	0	0	0	0	0	0	0	0	0	0	0	0	0	0	0	0	0	0	0	0	0	0	0	0	0	0	0	0	0	0	0	199	0	0	0
23008cfb42ff7cb55f0e05876222ab01	ASV2896	Bacteria	Firmicutes	Clostridia	Clostridiales	Clostridiaceae	Oceanirhabdus	NA	0	0	0	0	0	0	8	26	0	11	11	0	3	0	0	0	0	0	0	0	0	0	0	0	0	20	39	0	15	0	0	16	14	16	0	74	11	0	22	0	0
44f3d9428383df510179b208af7c486e	ASV1624	Bacteria	Firmicutes	Clostridia	Clostridiales	Clostridiaceae	Oceanirhabdus	uncultured_bacterium	0	0	0	0	0	0	0	0	0	0	0	0	0	0	0	0	0	0	0	0	0	0	0	0	0	0	0	0	0	0	0	0	0	0	0	0	0	67	0	0	8
86e368673f4c927faf4f3f625312e4f8	ASV1968	Bacteria	Firmicutes	Clostridia	Clostridiales	Clostridiaceae	uncultured	NA	13	0	0	0	0	0	0	0	0	0	0	0	0	0	0	0	0	0	0	0	0	4	0	0	411	0	0	0	0	0	0	0	0	0	0	0	0	0	0	0	0
89581f4bbbda312cfdbf0090b42041aa	ASV3032	Bacteria	Firmicutes	Clostridia	Clostridiales	Clostridiaceae	uncultured	uncultured_Oceanirhabdus	0	0	0	0	0	0	0	0	0	0	0	0	0	7	0	0	0	3	18	7	0	0	0	0	0	0	0	0	0	0	0	0	0	0	0	0	6	0	0	10	26
9e15e2335b5244601a3ace55708f9a79	ASV1310	Bacteria	Firmicutes	Clostridia	Clostridiales	Clostridiaceae	uncultured	uncultured_bacterium	0	0	0	0	0	0	0	25	0	0	0	0	0	0	0	0	0	0	0	0	0	0	0	0	0	0	32	0	0	0	0	0	0	0	0	0	0	0	0	0	0
9e5e4cad1a860a2cf26f167b0f8bf4a6	ASV1307	Bacteria	Firmicutes	Clostridia	Clostridiales	Clostridiaceae	uncultured	uncultured_Oceanirhabdus	0	0	0	0	0	0	0	0	0	0	0	0	0	0	0	0	0	0	0	0	0	0	0	0	0	0	0	0	0	0	0	0	37	0	0	0	0	0	0	0	0
be721a0b6911dd79946b272b14159f26	ASV3990	Bacteria	Firmicutes	Clostridia	Clostridiales	Clostridiaceae	uncultured	NA	0	0	0	0	0	0	0	0	0	0	0	0	0	0	0	0	0	0	0	0	0	0	0	0	0	0	0	0	0	0	0	0	0	24	0	0	0	0	0	0	0
9963c7a8971914a7b97eeae5dd3ba9f5	ASV2862	Bacteria	Firmicutes	Clostridia	Clostridiales	Clostridiaceae	uncultured	bacterium_enrichment	0	0	0	0	0	0	0	7	0	0	0	0	0	0	0	0	0	0	0	0	0	0	0	0	0	0	0	0	0	0	14	0	0	0	0	0	0	0	0	0	0
dcec4e289cfd6a6791da10e251dae496	ASV4640	Bacteria	Firmicutes	Clostridia	Clostridiales	Clostridiaceae	uncultured	uncultured_Eubacterium	0	0	0	0	0	0	0	0	0	0	0	0	0	0	0	0	0	0	0	0	0	0	0	20	0	0	0	0	0	0	0	0	0	0	0	0	0	0	0	0	0
6277a8c4680f0520f0f952c9e19f1fc1	ASV2732	Bacteria	Proteobacteria	Gammaproteobacteria	Coxiellales	Coxiellaceae	Coxiella	uncultured_Coxiella	0	0	17	17	0	16	0	0	0	0	0	0	0	21	0	0	0	22	0	15	0	16	0	0	9	0	0	0	0	0	0	0	6	0	0	0	0	35	0	0	0
014d66e085fce78863327cbf5278e079	ASV1397	Bacteria	Proteobacteria	Gammaproteobacteria	Coxiellales	Coxiellaceae	Coxiella	NA	0	0	16	0	0	8	0	0	0	0	0	8	0	4	0	0	0	0	0	0	0	8	15	45	0	0	0	0	0	0	13	0	20	0	0	0	0	0	13	4	0
46fac539acb8883fcb0b60dc2d7d14ab	ASV1638	Bacteria	Proteobacteria	Gammaproteobacteria	Coxiellales	Coxiellaceae	Coxiella	uncultured_bacterium	0	0	0	0	0	0	13	0	18	0	0	0	0	0	0	0	0	0	0	0	0	0	0	0	0	22	0	0	0	6	0	18	23	10	0	0	0	0	18	0	0
1caad92af79fb8034ddc0057fb038bf9	ASV191	Bacteria	Proteobacteria	Gammaproteobacteria	Coxiellales	Coxiellaceae	Coxiella	NA	0	0	0	0	0	0	0	17	28	0	0	0	0	0	0	0	0	0	0	0	0	0	0	0	0	0	0	0	0	0	0	0	27	19	0	0	0	0	34	0	0
ef5f9ee465301336f33ade21a2bdf42d	ASV5052	Bacteria	Proteobacteria	Gammaproteobacteria	Coxiellales	Coxiellaceae	Coxiella	NA	11	0	32	0	0	0	0	0	0	0	0	0	0	13	0	0	0	7	0	0	0	11	0	0	0	0	0	0	0	0	13	0	0	0	0	7	8	11	0	0	0
a805833799df595258478581b35bd520	ASV3577	Bacteria	Proteobacteria	Gammaproteobacteria	Coxiellales	Coxiellaceae	Coxiella	NA	0	0	5	0	0	8	0	0	0	0	0	0	0	0	9	0	0	0	0	0	8	0	13	0	0	0	0	0	0	0	19	0	0	0	0	0	0	12	0	0	0
b7a9965e6ef073f9d75707faa5f8c031	ASV3743	Bacteria	Proteobacteria	Gammaproteobacteria	Coxiellales	Coxiellaceae	Coxiella	NA	0	14	5	0	14	0	0	0	0	0	0	11	0	0	0	0	0	0	0	14	0	0	0	0	9	0	0	0	0	0	17	0	0	0	0	0	0	0	0	0	0
41dc1a78fcdadedde7b703b9a690ba10	ASV1595	Bacteria	Proteobacteria	Gammaproteobacteria	Coxiellales	Coxiellaceae	Coxiella	NA	0	0	15	0	0	15	0	0	0	0	0	0	0	0	0	0	0	0	0	0	0	0	22	7	0	0	0	0	0	0	0	0	0	0	0	0	0	0	0	0	17
0700d7be38717c236402c11c01f19870	ASV2410	Bacteria	Proteobacteria	Gammaproteobacteria	Coxiellales	Coxiellaceae	Coxiella	NA	0	9	0	0	0	0	0	0	0	0	0	0	0	0	0	10	0	13	0	0	0	0	9	0	0	0	10	0	0	0	0	0	0	0	0	0	0	0	0	0	12
0c1121436a29d9050f0517f87205a8ba	ASV54	Bacteria	Proteobacteria	Gammaproteobacteria	Coxiellales	Coxiellaceae	Coxiella	NA	0	0	8	0	0	0	0	0	0	0	0	0	4	0	0	0	0	0	0	0	0	9	24	0	8	0	0	0	0	0	10	0	0	0	0	0	0	0	0	0	0
981e40465fef02cee4368198b4d4fa8b	ASV2553	Bacteria	Proteobacteria	Gammaproteobacteria	Coxiellales	Coxiellaceae	Coxiella	NA	0	0	31	0	0	15	0	0	0	0	0	0	0	12	0	0	0	0	0	0	0	0	0	0	0	0	0	0	0	0	0	0	0	0	0	0	0	0	0	0	0
ad030feeb65e659fb3c4fffd63a47ca3	ASV3644	Bacteria	Proteobacteria	Gammaproteobacteria	Coxiellales	Coxiellaceae	Coxiella	uncultured_bacterium	5	0	4	0	0	0	0	0	0	0	0	0	0	0	0	0	6	9	0	0	4	4	0	0	9	0	0	0	0	0	0	0	0	0	0	0	5	0	0	0	9
09cd3191767370c650e36a72e59692ac	ASV1275	Bacteria	Proteobacteria	Gammaproteobacteria	Coxiellales	Coxiellaceae	Coxiella	NA	0	0	0	0	0	0	0	0	0	0	0	0	0	0	0	0	0	0	0	0	0	47	0	0	0	0	0	4	0	0	0	0	0	0	0	0	0	0	0	0	0
505ae7a3f754889786729b21f1cbb9fd	ASV2307	Bacteria	Proteobacteria	Gammaproteobacteria	Coxiellales	Coxiellaceae	Coxiella	Coxiella_endosymbiont	0	0	0	0	0	0	0	0	0	0	0	0	0	0	0	10	0	0	0	0	0	0	0	0	0	0	0	0	0	0	0	0	0	0	0	0	9	16	0	13	0
452dd0bf5c3f768ab7be21687c85162b	ASV2279	Bacteria	Proteobacteria	Gammaproteobacteria	Coxiellales	Coxiellaceae	Coxiella	uncultured_bacterium	0	0	0	0	0	0	0	0	0	0	0	0	0	0	0	0	0	0	0	8	0	0	0	0	0	0	0	0	0	22	0	0	0	0	0	0	0	0	4	0	0
afab73afb44245fcb41add2bec33fa59	ASV3688	Bacteria	Proteobacteria	Gammaproteobacteria	Coxiellales	Coxiellaceae	Coxiella	uncultured_gamma	0	0	0	0	0	0	0	0	0	0	0	0	0	0	0	0	0	0	0	0	0	0	0	0	0	0	0	0	0	0	0	0	0	0	0	0	0	0	0	0	30
d21236f2e4a2aef19d60ef1b732a5da2	ASV4551	Bacteria	Proteobacteria	Gammaproteobacteria	Coxiellales	Coxiellaceae	Coxiella	NA	0	0	0	0	0	0	0	0	0	0	0	0	0	0	0	0	0	0	0	0	0	0	0	0	0	0	0	19	4	0	0	0	0	0	0	0	0	7	0	0	0
0fe6b48d1b1d43f3a2d950a93a2caf87	ASV127	Bacteria	Proteobacteria	Gammaproteobacteria	Coxiellales	Coxiellaceae	Coxiella	uncultured_bacterium	0	0	0	0	0	0	0	0	0	0	24	0	0	0	0	0	0	0	0	0	0	0	0	0	0	0	0	0	0	0	0	0	0	0	0	0	0	0	0	0	0
7e2e8caf847149f7d070f5820191dd32	ASV1024	Bacteria	Proteobacteria	Gammaproteobacteria	Coxiellales	Coxiellaceae	Coxiella	NA	0	0	0	0	0	0	0	0	0	0	0	0	0	0	0	0	0	0	0	0	0	0	0	24	0	0	0	0	0	0	0	0	0	0	0	0	0	0	0	0	0
182c90ba8d2548d7a3acd0b45a8c314c	ASV2138	Bacteria	Proteobacteria	Gammaproteobacteria	Coxiellales	Coxiellaceae	Coxiella	NA	0	0	0	0	0	0	0	0	0	0	0	0	0	0	0	0	0	0	0	0	0	0	0	0	22	0	0	0	0	0	0	0	0	0	0	0	0	0	0	0	0
13fc707b5c07c60fd68331d358f2d5f0	ASV1391	Bacteria	Proteobacteria	Gammaproteobacteria	Coxiellales	Coxiellaceae	Coxiella	NA	0	0	0	0	14	0	0	0	0	0	0	0	0	0	0	0	0	0	0	0	0	0	0	0	0	0	0	0	6	0	0	0	0	0	0	0	0	0	0	0	0
de7853423a9fabe0cbfc0dd3109fdddf	ASV4676	Bacteria	Cyanobacteria	Cyanobacteriia	Cyanobacteriales	Cyanobacteriaceae	Cyanobacterium_CLg1	NA	0	0	0	0	0	0	0	8	0	0	0	0	0	0	0	0	0	0	0	0	0	0	0	0	0	29	209	0	0	0	0	0	0	0	0	0	0	0	0	0	0
ca276e0ca9f7f37d0c91fee20c77a6f1	ASV4272	Bacteria	Cyanobacteria	Cyanobacteriia	Cyanobacteriales	Cyanobacteriaceae	Cyanobacterium_CLg1	NA	0	0	9	0	0	0	14	0	0	0	0	0	0	0	0	0	0	4	0	0	0	25	0	0	0	0	0	0	0	0	5	0	0	0	0	0	0	0	0	0	0
e4146abc9243a6eef03f2701166590e4	ASV4907	Bacteria	Cyanobacteria	Cyanobacteriia	Cyanobacteriales	Cyanobacteriaceae	Cyanobacterium_CLg1	uncultured_bacterium	0	0	0	0	0	0	0	0	0	0	0	0	0	0	0	0	0	0	6	0	0	0	0	0	0	0	0	0	0	11	0	9	10	0	0	0	0	0	0	0	0
9aa6a6fb5396858a2c515aa46e1e5ba3	ASV1221	Bacteria	Cyanobacteria	Cyanobacteriia	Cyanobacteriales	Geitlerinemaceae	Geitlerinema_PCC-7105	Oscillatoriales_cyanobacterium	41	26	8	5	0	16	0	0	0	0	0	0	0	11	0	0	9	11	15	4	0	0	12	42	0	0	0	0	0	0	24	0	0	0	0	61	0	6	0	27	0
dac8e839472ebac3204fce32b53bcd61	ASV4593	Bacteria	Cyanobacteria	Cyanobacteriia	Cyanobacteriales	Nostocaceae	NA	NA	0	0	0	0	0	0	0	0	0	0	0	0	0	0	0	0	0	0	0	0	0	0	0	0	0	0	0	0	0	0	0	0	0	0	0	0	0	0	0	35	0
635676df62051f055c41886b9c69c059	ASV3149	Bacteria	Cyanobacteria	Cyanobacteriia	Cyanobacteriales	NA	NA	NA	0	0	0	0	0	0	0	0	0	0	0	0	0	0	0	0	0	0	0	0	0	0	0	0	0	0	0	0	23	0	0	0	0	0	0	0	0	0	0	0	0
aa0a25f07c734555ada96b6ae1fcbde0	ASV3579	Bacteria	Cyanobacteria	Cyanobacteriia	Cyanobacteriales	Xenococcaceae	Pleurocapsa_PCC-7319	NA	37	0	0	18	0	16	49	46	60	56	22	0	33	10	0	0	23	11	29	250	27	0	0	10	0	170	160	111	157	105	0	145	154	34	0	0	13	44	98	17	9
4c52586604edc9f9aa9353ef889dfb9e	ASV590	Bacteria	Cyanobacteria	Cyanobacteriia	Cyanobacteriales	Xenococcaceae	Pleurocapsa_PCC-7319	NA	0	0	0	0	0	0	0	0	0	0	0	0	0	0	0	0	0	0	0	86	0	33	0	0	0	17	0	0	11	0	6	0	0	0	0	0	0	16	0	0	0
2b73885b7f79a0d3c3381efafc81de37	ASV310	Bacteria	Cyanobacteria	Cyanobacteriia	Cyanobacteriales	Xenococcaceae	Pleurocapsa_PCC-7319	Pleurocapsa_sp.	0	0	5	0	0	0	0	0	0	0	0	0	0	0	0	0	0	0	0	114	0	0	0	0	0	0	0	0	0	0	0	0	0	0	0	0	0	0	0	0	0
e1db709291a440628a09c339a53b1e44	ASV4739	Bacteria	Cyanobacteria	Cyanobacteriia	Cyanobacteriales	Xenococcaceae	Pleurocapsa_PCC-7319	uncultured_bacterium	0	0	0	0	29	0	0	0	0	0	0	0	0	0	0	0	0	0	0	0	0	0	0	0	0	0	0	0	0	0	0	0	0	0	0	0	0	0	0	0	0
27361218a62a5f162e533049959c735a	ASV3286	Bacteria	Cyanobacteria	Cyanobacteriia	Cyanobacteriales	Xenococcaceae	Pleurocapsa_PCC-7319	NA	0	0	0	0	0	0	0	0	0	0	0	0	0	0	0	0	0	0	0	0	0	26	0	0	0	0	0	0	0	0	0	0	0	0	0	0	0	0	0	0	0
50d3b2e54be2cae0fbe5f0203677bff9	ASV1661	Bacteria	Cyanobacteria	Cyanobacteriia	Cyanobacteriales	Xenococcaceae	Pleurocapsa_PCC-7319	NA	0	0	0	0	0	0	0	0	0	0	0	0	0	0	0	0	0	0	0	0	0	0	0	0	0	0	0	0	26	0	0	0	0	0	0	0	0	0	0	0	0
4d72f8801e8659ca2ddbfab3939fc6f2	ASV609	Bacteria	Cyanobacteria	Cyanobacteriia	Cyanobacteriales	Cyanobacteriaceae	Symphothece_PCC-7002	NA	0	0	0	0	0	0	0	0	0	0	0	0	0	0	0	0	0	0	0	0	0	0	0	0	0	54	0	0	0	0	0	0	0	0	0	0	0	0	0	0	0
41617cb6fdb437c4f9f4c46cdbe98c45	ASV2939	Bacteria	Cyanobacteria	Cyanobacteriia	Cyanobacteriales	Xenococcaceae	Xenococcus_PCC-7305	uncultured_bacterium	49	17	24	34	28	0	0	0	0	0	0	19	0	0	25	30	0	96	33	56	24	20	26	39	119	0	0	0	0	0	51	0	0	0	0	15	21	0	0	0	0
60cbdd81a9895965b7fd1c1cd44f9973	ASV1730	Bacteria	Cyanobacteria	Cyanobacteriia	Cyanobacteriales	Xenococcaceae	Xenococcus_PCC-7305	Xenococcus_sp.	0	0	0	0	0	0	0	0	0	0	0	0	0	12	0	0	0	0	0	28	0	0	0	0	0	0	0	0	0	0	0	0	0	0	0	0	0	16	0	0	0
9ebde83de6eeb05aad12d7c17024e5c1	ASV1325	Bacteria	Cyanobacteria	Cyanobacteriia	Cyanobacteriales	Xenococcaceae	Xenococcus_PCC-7305	NA	0	0	0	0	0	0	0	20	0	0	0	0	14	0	0	0	0	0	0	0	0	0	0	0	0	0	0	0	0	0	0	0	0	0	0	0	0	0	19	0	0
d0da2883fdbec1f51339ba72376b0982	ASV4402	Bacteria	Cyanobacteria	Cyanobacteriia	Cyanobacteriales	Xenococcaceae	Xenococcus_PCC-7305	uncultured_bacterium	0	0	0	0	0	0	0	0	0	0	0	0	0	0	0	0	0	0	0	0	0	0	0	0	0	7	0	21	7	0	0	0	0	0	0	0	0	0	0	0	0
61d1fc801d596b32e8a8a59c7ddc9824	ASV1742	Bacteria	Cyanobacteria	Cyanobacteriia	Cyanobacteriales	Xenococcaceae	Xenococcus_PCC-7305	uncultured_bacterium	0	0	0	0	0	0	0	0	0	0	0	0	0	0	0	0	0	0	0	0	0	0	0	0	0	0	0	0	0	0	0	0	0	0	0	0	0	0	0	0	25
eced8ca523b6c56f1493deb0c7b594b6	ASV5001	Bacteria	Cyanobacteria	Cyanobacteriia	Cyanobacteriales	Xenococcaceae	Xenococcus_PCC-7305	uncultured_bacterium	0	0	0	0	0	0	0	0	0	0	0	0	0	0	0	0	0	0	0	0	0	0	0	0	0	0	0	0	0	0	0	24	0	0	0	0	0	0	0	0	0
5fd11b62656135f3b88e7b4571b20577	ASV799	Bacteria	Bacteroidota	Bacteroidia	Cytophagales	Amoebophilaceae	Candidatus_Amoebophilus	uncultured_Bacteroidetes	0	0	9	455	232	0	0	0	13	24	884	0	36	0	0	0	0	30	757	0	0	0	0	0	0	0	0	0	22	26	2	0	0	259	0	0	0	22	31	14	73
957694901c052a3c8665ec73550b2a7e	ASV3342	Bacteria	Bacteroidota	Bacteroidia	Cytophagales	Amoebophilaceae	Candidatus_Amoebophilus	uncultured_organism	0	0	0	0	13	0	641	0	0	24	0	0	0	706	0	0	0	0	0	0	0	0	0	0	0	0	0	0	0	0	0	0	0	0	0	0	0	0	0	0	0
9cc5c6a81e1d8a15ec2edd81e56b7072	ASV1274	Bacteria	Bacteroidota	Bacteroidia	Cytophagales	Amoebophilaceae	Candidatus_Amoebophilus	microbial_mat	228	9	0	80	0	0	5	43	0	11	11	0	0	0	0	116	0	0	0	36	0	63	0	36	0	0	0	0	0	0	0	0	0	0	0	0	0	0	0	0	11
179ec6e7b692f7344d7d4fba6901f952	ASV2135	Bacteria	Bacteroidota	Bacteroidia	Cytophagales	Amoebophilaceae	Candidatus_Amoebophilus	microbial_mat	0	0	0	0	0	0	0	0	0	0	0	0	0	0	0	0	0	0	0	0	0	0	0	85	0	0	0	0	0	0	0	0	0	0	349	0	0	0	0	0	0
26b25704a3b6e9d8966c5a347e726530	ASV1480	Bacteria	Bacteroidota	Bacteroidia	Cytophagales	Amoebophilaceae	Candidatus_Amoebophilus	uncultured_bacterium	0	0	0	0	0	0	0	0	0	0	0	15	0	0	0	15	7	44	0	0	0	0	0	0	0	0	0	12	0	0	0	0	0	0	0	18	0	0	0	0	0
9fc192e4de51437cc5a427bee74f48de	ASV1348	Bacteria	Bacteroidota	Bacteroidia	Cytophagales	Amoebophilaceae	Candidatus_Amoebophilus	uncultured_Bacteroidetes	0	0	0	0	0	0	0	32	0	0	0	0	0	0	0	0	0	0	0	0	0	0	0	0	0	95	0	0	0	0	0	0	0	0	0	0	0	0	0	0	0
b15872738089f869a28980514e137153	ASV3891	Bacteria	Bacteroidota	Bacteroidia	Cytophagales	Amoebophilaceae	Candidatus_Amoebophilus	uncultured_Bacteroidetes	0	0	0	16	15	0	0	0	0	0	0	0	0	0	0	0	0	0	0	46	22	0	0	0	0	0	0	0	0	0	0	0	0	0	13	0	0	0	0	0	0
a24b9aefdcce6776dd5fd389e9e08357	ASV3474	Bacteria	Bacteroidota	Bacteroidia	Cytophagales	Amoebophilaceae	Candidatus_Amoebophilus	NA	0	0	0	0	0	0	0	0	0	0	0	0	0	0	14	0	0	0	0	0	16	0	0	42	0	0	0	0	0	0	12	0	0	0	0	0	0	0	0	0	0
52fdb6a786c6edd74bd2854df9d1a0ec	ASV1680	Bacteria	Bacteroidota	Bacteroidia	Cytophagales	Amoebophilaceae	Candidatus_Amoebophilus	uncultured_Bacteroidetes	0	0	0	0	0	0	0	0	0	0	0	0	0	0	0	0	0	0	0	0	0	0	0	73	0	0	0	0	0	0	0	0	0	0	0	0	0	0	0	0	0
48b8a92b708071c17010947e9b08104c	ASV1647	Bacteria	Bacteroidota	Bacteroidia	Cytophagales	Amoebophilaceae	Candidatus_Amoebophilus	uncultured_Bacteroidetes	0	0	0	0	0	0	0	0	0	0	27	0	0	0	0	0	0	32	0	0	0	0	0	0	0	0	0	0	0	0	0	0	0	0	0	0	0	0	0	4	0
a17eda88f0716a5faaedad1f666ab721	ASV3471	Bacteria	Bacteroidota	Bacteroidia	Cytophagales	Amoebophilaceae	Candidatus_Amoebophilus	NA	0	0	0	0	0	0	0	0	0	0	0	0	0	0	0	0	0	0	0	0	0	0	0	0	0	0	0	0	0	0	0	0	0	0	0	0	0	0	40	0	0
0a56fc6f707dacfd1d50c840cf14adc2	ASV7	Bacteria	Bacteroidota	Bacteroidia	Cytophagales	Amoebophilaceae	Candidatus_Amoebophilus	uncultured_Bacteroidetes	0	0	0	0	0	0	0	0	0	0	0	0	0	0	0	0	0	0	0	0	0	0	0	0	0	0	0	0	0	0	0	0	0	0	0	0	13	17	0	3	0
a8d3a22e138353c9a9792dc1a27587f0	ASV3451	Bacteria	Bacteroidota	Bacteroidia	Cytophagales	Amoebophilaceae	Candidatus_Amoebophilus	uncultured_Cytophaga	0	0	0	0	0	0	0	0	0	0	0	0	0	0	0	0	0	0	0	0	0	0	0	0	0	0	0	0	0	0	0	0	0	27	0	0	0	0	0	0	0
c5b68fbc83fa7acc3fafd8fa45eebf3f	ASV4068	Bacteria	Bacteroidota	Bacteroidia	Cytophagales	Microscillaceae	Chryseolinea	uncultured_Flammeovirgaceae	0	0	3	5	0	0	0	0	0	0	14	0	0	0	0	0	0	0	0	0	0	0	11	0	0	0	0	0	0	0	0	0	0	0	0	0	14	0	0	0	0
6ee939ebb8ceaf596ca1967c54da68d7	ASV907	Bacteria	Bacteroidota	Bacteroidia	Cytophagales	Cyclobacteriaceae	Ekhidna	NA	86	127	680	346	244	352	250	263	91	97	119	346	281	169	201	189	238	199	196	160	230	159	126	221	0	437	53	501	204	1167	285	115	112	177	253	328	121	249	267	188	78
7fc1e56876e6d8d049ba78c954e1f11f	ASV1056	Bacteria	Bacteroidota	Bacteroidia	Cytophagales	Cyclobacteriaceae	Ekhidna	Flexibacteraceae_bacterium	212	121	182	253	246	163	84	261	122	63	97	150	149	103	124	172	283	210	103	182	296	170	182	169	184	135	55	98	0	93	246	93	69	60	188	241	227	163	120	104	69
509f1e70cbb25a9d0d9bf37c962eda6f	ASV2312	Bacteria	Bacteroidota	Bacteroidia	Cytophagales	Cyclobacteriaceae	Ekhidna	Ekhidna_sp.	88	77	168	123	282	159	213	278	217	125	175	123	72	193	73	75	112	87	173	131	78	140	235	70	0	216	96	139	115	89	181	169	149	155	71	96	106	108	227	39	69
0c4d07797a4ffca7490a8f5b6b0e1785	ASV47	Bacteria	Bacteroidota	Bacteroidia	Cytophagales	Cyclobacteriaceae	Ekhidna	NA	0	0	0	0	0	0	0	0	0	0	0	0	0	0	0	0	0	0	0	0	0	0	0	0	0	0	0	0	1842	0	0	0	0	0	0	0	0	0	0	0	0
027cab17c4218453342bedf233942c23	ASV1487	Bacteria	Bacteroidota	Bacteroidia	Cytophagales	Cyclobacteriaceae	Ekhidna	NA	0	36	0	0	0	0	104	284	119	50	96	0	0	0	0	0	0	0	0	0	0	0	0	0	0	160	53	85	64	53	0	112	80	73	0	0	51	0	163	0	0
c25f1cb32a7b0a91b656360017058a2b	ASV4122	Bacteria	Bacteroidota	Bacteroidia	Cytophagales	Cyclobacteriaceae	Ekhidna	uncultured_Flexibacter	0	96	81	77	75	40	0	0	0	0	0	216	43	70	30	0	32	0	43	48	0	31	0	38	0	0	0	0	0	0	58	0	0	0	0	0	0	42	0	0	0
c4342d4356aa88d5100d2a253eccda21	ASV4220	Bacteria	Bacteroidota	Bacteroidia	Cytophagales	Cyclobacteriaceae	Ekhidna	NA	0	0	153	75	0	0	0	89	0	0	0	57	0	0	0	0	0	0	0	0	0	0	0	0	0	72	0	107	0	111	61	0	0	0	0	0	0	0	72	0	0
e0d5f1025c72056dbc8753d56a117acb	ASV4726	Bacteria	Bacteroidota	Bacteroidia	Cytophagales	Cyclobacteriaceae	Ekhidna	uncultured_Bacteroidetes	0	0	0	0	83	0	93	67	88	0	52	0	0	0	0	57	0	0	0	0	0	0	62	0	0	77	0	68	0	0	0	0	56	60	0	0	0	0	102	0	0
89c5d225fbabb44a268afcbb0d1bc977	ASV1994	Bacteria	Bacteroidota	Bacteroidia	Cytophagales	Cyclobacteriaceae	Ekhidna	NA	0	0	178	0	0	121	0	0	0	0	0	0	0	0	0	0	0	0	0	0	0	0	0	0	0	0	0	0	0	194	0	0	0	0	0	0	0	0	0	0	0
6be823d36a9362b2e95e0caf26eaa36c	ASV845	Bacteria	Bacteroidota	Bacteroidia	Cytophagales	Cyclobacteriaceae	Ekhidna	NA	0	0	0	0	0	0	0	0	13	0	32	0	0	0	0	0	0	0	0	0	0	0	0	0	0	0	54	0	18	0	0	0	0	0	0	0	0	0	0	0	0
7630c012a4217e3a85236a0f851c7753	ASV2771	Bacteria	Bacteroidota	Bacteroidia	Cytophagales	Cyclobacteriaceae	Ekhidna	uncultured_bacterium	0	0	0	24	16	0	0	0	0	0	0	0	0	0	0	0	0	0	0	0	0	0	0	0	0	0	0	0	0	0	15	0	0	0	0	32	29	0	0	0	0
31ebb4fa739eaa23b50d0e4efaaa2b7b	ASV1527	Bacteria	Bacteroidota	Bacteroidia	Cytophagales	Cyclobacteriaceae	Ekhidna	NA	0	0	0	0	0	0	0	0	0	0	74	0	0	0	0	0	0	0	0	0	0	0	0	0	0	0	0	0	0	0	0	0	0	0	0	0	0	0	0	0	0
8e0bcc04408c7317d6f34ae9017697b2	ASV1157	Bacteria	Bacteroidota	Bacteroidia	Cytophagales	Cyclobacteriaceae	Ekhidna	uncultured_Flammeovirgaceae	0	5	0	0	0	0	0	0	0	0	17	0	0	0	0	0	0	4	8	0	0	0	0	0	0	0	0	3	0	0	0	0	0	0	0	0	0	8	0	4	0
6880cc57cd3c47762edb79712b98e623	ASV2747	Bacteria	Bacteroidota	Bacteroidia	Cytophagales	Cyclobacteriaceae	Ekhidna	uncultured_Flammeovirgaceae	0	0	0	0	0	0	19	0	0	0	0	0	0	0	0	0	0	0	0	0	0	0	0	0	0	0	0	0	0	0	0	0	0	18	0	0	0	0	0	0	0
b5f4ab20281aa3199ebc9c0f91e5821d	ASV3733	Bacteria	Bacteroidota	Bacteroidia	Cytophagales	Cyclobacteriaceae	Ekhidna	NA	0	0	0	0	0	0	0	0	0	0	0	0	0	0	0	0	0	0	0	0	0	0	0	0	0	0	29	0	0	0	0	0	0	0	0	0	0	0	0	0	0
67f2fd0ce0fa876fe119a53ec9c9cc89	ASV1803	Bacteria	Bacteroidota	Bacteroidia	Cytophagales	Cyclobacteriaceae	Ekhidna	uncultured_Flammeovirgaceae	0	0	0	0	0	0	0	0	0	0	0	0	0	0	0	0	0	0	0	0	0	0	0	0	0	0	0	0	16	0	0	0	0	0	0	0	0	0	9	0	0
1e2f03dfdeac1473b0777c1a377946fd	ASV227	Bacteria	Bacteroidota	Bacteroidia	Cytophagales	Cyclobacteriaceae	Ekhidna	uncultured_Flammeovirgaceae	0	0	0	0	0	0	0	0	0	0	0	0	0	0	0	0	0	0	0	0	0	0	0	0	0	0	0	0	0	0	0	0	0	0	0	0	0	0	0	0	0
33aa33350392a4ef55f443bbbe14096d	ASV1535	Bacteria	Bacteroidota	Bacteroidia	Cytophagales	Cyclobacteriaceae	Fabibacter	uncultured_bacterium	135	148	131	124	104	104	0	0	0	0	0	47	75	0	133	174	163	169	35	147	114	123	128	142	50	0	0	0	0	0	140	0	0	0	201	254	186	152	0	82	85
161894e09f08b16021b0eeb926970453	ASV3073	Bacteria	Bacteroidota	Bacteroidia	Cytophagales	Cyclobacteriaceae	Fabibacter	NA	0	29	426	0	0	20	0	0	0	0	0	162	0	0	0	0	0	21	0	0	41	0	48	0	0	0	0	0	0	64	41	0	0	0	0	0	0	0	0	42	0
c782966000349ba7a370b2c16cf8a71d	ASV4261	Bacteria	Bacteroidota	Bacteroidia	Cytophagales	Cyclobacteriaceae	Fabibacter	NA	0	0	0	0	0	0	66	130	80	25	24	0	0	0	23	0	32	0	0	0	0	0	0	0	0	108	42	53	35	0	0	86	87	31	0	26	0	0	102	0	0
9771fb8afd3c3ecbc27233b000dcf643	ASV2855	Bacteria	Bacteroidota	Bacteroidia	Cytophagales	Cyclobacteriaceae	Fabibacter	uncultured_bacterium	0	0	68	67	0	0	31	80	0	50	21	0	0	0	0	0	0	116	0	0	0	0	0	0	0	56	76	53	0	0	0	81	0	48	0	0	0	0	86	0	0
93fd1451ba4a5d0305c536b4e5822972	ASV2035	Bacteria	Bacteroidota	Bacteroidia	Cytophagales	Cyclobacteriaceae	Fabibacter	uncultured_bacterium	0	0	0	0	0	0	0	74	0	0	0	87	0	0	0	0	0	0	0	0	0	0	0	0	0	0	0	49	116	303	0	0	133	0	0	0	0	0	0	0	0
23b852f6dcba347288a1b936ad054fbf	ASV1463	Bacteria	Bacteroidota	Bacteroidia	Cytophagales	Cyclobacteriaceae	Fabibacter	NA	0	0	0	0	0	0	55	0	0	0	0	0	0	0	0	0	0	0	23	0	0	50	0	0	0	0	0	36	0	0	0	0	0	0	0	0	0	105	0	0	0
c4961c87dba8c48eb8155920cb501aec	ASV4222	Bacteria	Bacteroidota	Bacteroidia	Cytophagales	Cyclobacteriaceae	Fabibacter	uncultured_bacterium	0	29	0	29	0	0	38	0	0	0	27	0	0	0	0	0	20	0	0	0	0	0	0	0	0	32	0	53	0	0	0	0	0	0	47	0	37	0	0	0	19
b22eb85067289925dd99cb2d7fecfa8a	ASV3781	Bacteria	Bacteroidota	Bacteroidia	Cytophagales	Cyclobacteriaceae	Fabibacter	NA	0	0	0	0	0	0	0	0	0	0	0	0	0	92	0	0	0	0	0	0	0	0	0	0	0	0	0	29	0	0	0	0	40	0	0	0	0	0	0	0	0
3ca0eb67d44ba5bcdd6be4c766e5096b	ASV467	Bacteria	Bacteroidota	Bacteroidia	Cytophagales	Cyclobacteriaceae	Fabibacter	uncultured_bacterium	0	0	0	0	0	0	0	0	13	0	0	0	0	0	0	0	0	0	0	0	0	0	0	0	0	0	0	0	0	0	0	0	0	0	0	0	0	0	14	0	0
cfe0390f906be4e6816f9b7ffc7b34df	ASV4393	Bacteria	Bacteroidota	Bacteroidia	Cytophagales	Cyclobacteriaceae	Fabibacter	NA	0	0	0	0	0	0	0	0	0	0	0	0	0	0	0	0	0	0	0	0	0	0	0	0	0	0	0	0	0	0	0	0	0	0	0	0	0	27	0	0	0
a2920ae1a05f76165ab636cd3f4acc21	ASV3539	Bacteria	Bacteroidota	Bacteroidia	Cytophagales	Flammeovirgaceae	Flexithrix	Flexithrix_dorotheae	64	50	345	80	185	130	106	143	75	25	82	168	86	113	66	58	64	65	77	83	61	165	183	43	27	174	50	140	61	135	400	40	68	69	62	104	124	123	109	49	16
ed65c2834d06366a746f412f26e1bd6e	ASV5004	Bacteria	Bacteroidota	Bacteroidia	Cytophagales	Flammeovirgaceae	Flexithrix	uncultured_Flammeovirgaceae	0	0	0	0	0	0	21	42	0	6	0	20	0	0	0	0	0	0	0	0	0	0	0	0	0	12	0	143	30	522	0	0	5	4	0	0	0	0	33	0	0
9b785ea5c9bf8015e589ecdc46d75d00	ASV1245	Bacteria	Bacteroidota	Bacteroidia	Cytophagales	Flammeovirgaceae	Flexithrix	Flexithrix_dorotheae	0	0	0	9	0	0	0	0	29	0	0	11	0	0	0	0	0	0	0	0	0	0	0	85	0	68	0	9	25	29	17	0	0	0	0	0	0	0	20	0	0
b8ec832400aafcfe80777d214bb82a7f	ASV3763	Bacteria	Bacteroidota	Bacteroidia	Cytophagales	Flammeovirgaceae	Flexithrix	Flexithrix_dorotheae	0	0	0	4	0	0	0	0	0	0	0	0	0	0	0	0	12	0	0	10	12	0	0	9	0	0	0	0	0	0	0	0	0	8	0	18	28	12	0	0	0
6c443b19326327099b99cd4c39bcc6f8	ASV854	Bacteria	Bacteroidota	Bacteroidia	Cytophagales	Flammeovirgaceae	Flexithrix	uncultured_organism	0	0	42	0	26	0	0	0	0	0	0	0	0	0	0	0	0	0	0	0	0	0	0	0	0	0	0	0	0	35	0	0	0	0	0	0	0	0	0	0	0
1c33ccac185ec371bf9a32dd8263e4ad	ASV181	Bacteria	Bacteroidota	Bacteroidia	Cytophagales	Flammeovirgaceae	Flexithrix	uncultured_organism	0	13	0	0	0	0	0	0	0	0	0	0	0	0	0	0	0	0	0	0	0	0	0	11	0	0	0	0	0	0	0	3	0	4	0	0	0	0	4	0	0
a11f6c94077e3ff5191bc08888d1b5d7	ASV3466	Bacteria	Bacteroidota	Bacteroidia	Cytophagales	Flammeovirgaceae	Flexithrix	Flexithrix_dorotheae	0	0	0	0	0	0	0	18	0	0	0	0	0	0	0	0	0	0	0	0	0	0	0	0	0	0	0	0	0	0	0	0	15	0	0	0	0	0	0	0	0
2aea34a87dd9ea86b7d6ebd4ec637440	ASV296	Bacteria	Bacteroidota	Bacteroidia	Cytophagales	Cyclobacteriaceae	Fulvivirga	Fulvivirga_lutimaris	623	357	703	830	913	543	416	512	548	150	443	572	343	492	498	579	626	750	431	632	437	554	557	594	477	744	310	336	238	135	571	335	234	394	420	543	676	622	563	230	283
7e258982092437ee5540bee8cd86f5f6	ASV1032	Bacteria	Bacteroidota	Bacteroidia	Cytophagales	Cyclobacteriaceae	Fulvivirga	uncultured_bacterium	633	396	1452	972	928	779	58	213	27	0	71	1231	811	610	654	515	631	799	246	556	582	676	547	534	328	74	0	125	53	404	718	41	32	37	371	390	402	981	65	453	272
880bc30f98d8d3dab766f07c0b0fc3f6	ASV2504	Bacteria	Bacteroidota	Bacteroidia	Cytophagales	Cyclobacteriaceae	Fulvivirga	NA	302	226	478	345	497	453	188	256	133	94	98	242	223	216	288	306	506	483	144	456	457	339	333	221	168	217	111	184	85	324	287	184	179	170	286	422	574	515	232	101	161
fb541b9f685600a225b974dadd1d0ec8	ASV5309	Bacteria	Bacteroidota	Bacteroidia	Cytophagales	Cyclobacteriaceae	Fulvivirga	uncultured_bacterium	122	64	117	97	201	122	47	107	47	68	52	64	95	98	79	139	164	160	66	182	124	118	107	107	97	105	32	49	38	41	110	74	72	36	109	130	164	127	109	67	61
594a4cd50e4778b8262ccd12f6c36896	ASV2356	Bacteria	Bacteroidota	Bacteroidia	Cytophagales	Cyclobacteriaceae	Fulvivirga	NA	102	89	230	215	93	229	0	0	0	0	0	160	144	88	116	136	90	173	0	109	214	95	106	281	64	0	0	202	0	54	152	0	0	0	81	106	107	177	0	123	0
c976eee4537a465084369beadefafe41	ASV4208	Bacteria	Bacteroidota	Bacteroidia	Cytophagales	Cyclobacteriaceae	Fulvivirga	Sphingobacteriales_bacterium	32	0	0	15	0	10	99	315	142	56	107	20	0	0	0	0	22	23	65	0	21	15	0	0	20	232	85	65	63	66	0	206	221	132	11	26	26	0	181	16	0
5a46835d237ec3a1c95e90da2c6b02ca	ASV684	Bacteria	Bacteroidota	Bacteroidia	Cytophagales	Cyclobacteriaceae	Fulvivirga	Marivirga_tractuosa	35	12	9	28	13	7	91	102	110	57	82	0	0	9	0	20	30	75	61	14	7	23	31	58	56	188	165	156	113	58	25	92	59	80	13	21	18	0	100	9	17
038c84e99df4d1518f2de81308e8137e	ASV1572	Bacteria	Bacteroidota	Bacteroidia	Cytophagales	Cyclobacteriaceae	Fulvivirga	NA	63	65	98	110	95	52	0	0	0	0	0	53	42	49	89	73	71	91	32	65	223	67	58	23	41	11	0	0	0	31	55	16	0	0	41	59	56	74	0	46	41
89d8105ac0402dde963e84794ceeb2d7	ASV1998	Bacteria	Bacteroidota	Bacteroidia	Cytophagales	Cyclobacteriaceae	Fulvivirga	uncultured_bacterium	0	0	139	84	0	163	0	0	0	0	0	130	0	0	0	0	0	0	0	0	75	0	0	50	0	0	0	0	0	0	60	0	0	0	0	0	0	0	0	0	0
086d617321db4a6a996373822d5b3634	ASV1966	Bacteria	Bacteroidota	Bacteroidia	Cytophagales	Cyclobacteriaceae	Fulvivirga	Fulvivirga_sp.	0	0	0	0	0	0	0	28	24	12	12	0	0	0	0	0	0	0	0	0	0	0	0	0	0	59	26	35	15	7	0	25	18	18	0	0	0	0	20	0	0
73069751f4759fd28085075b10152131	ASV3312	Bacteria	Bacteroidota	Bacteroidia	Cytophagales	Cyclobacteriaceae	Fulvivirga	uncultured_Bacteroidetes	0	0	0	0	0	0	20	0	0	16	0	0	0	0	0	0	0	0	0	0	0	0	0	0	0	0	0	0	7	0	0	0	0	0	0	0	0	76	0	0	0
67360b349f78977af468d57b7cac66a1	ASV2990	Bacteria	Bacteroidota	Bacteroidia	Cytophagales	Cyclobacteriaceae	Fulvivirga	NA	19	0	0	0	0	0	0	0	0	0	0	0	0	0	0	10	0	10	7	0	0	0	10	0	0	0	0	0	0	0	0	0	9	0	0	0	0	0	0	0	0
e968ffa3cbf2966a0b8e08af994423da	ASV4902	Bacteria	Bacteroidota	Bacteroidia	Cytophagales	Cyclobacteriaceae	Fulvivirga	uncultured_bacterium	0	0	0	0	0	0	0	0	0	0	0	0	0	0	0	0	0	0	0	0	0	0	0	0	0	0	0	17	0	0	0	20	0	0	0	0	0	0	0	0	0
7711bdc9e68215bc584f7ace806900f5	ASV2774	Bacteria	Bacteroidota	Bacteroidia	Cytophagales	Cyclobacteriaceae	Marinoscillum	NA	17	265	595	145	121	139	20	0	24	0	0	291	82	98	38	16	0	50	30	24	31	37	66	170	0	8	0	7	13	0	127	0	0	0	6	0	0	64	0	26	0
c1872023075212837ca4bb98bb5a5a28	ASV4263	Bacteria	Bacteroidota	Bacteroidia	Cytophagales	Cyclobacteriaceae	Marinoscillum	bacterium_DG873	87	44	43	36	108	56	97	107	96	28	58	122	36	63	58	25	0	59	72	50	0	91	144	61	61	56	38	114	43	30	56	69	74	100	31	24	42	48	93	44	30
8834681d5ca8b48c5fe3856a6bc0e373	ASV3271	Bacteria	Bacteroidota	Bacteroidia	Cytophagales	Cyclobacteriaceae	Marinoscillum	NA	15	109	511	80	76	53	0	57	36	0	7	147	56	67	103	55	27	70	0	7	9	36	76	115	11	0	0	0	9	0	96	0	5	0	0	0	0	48	0	31	0
b1a0fa8eca4601043403043ba0a700b9	ASV3700	Bacteria	Bacteroidota	Bacteroidia	Cytophagales	Cyclobacteriaceae	Marinoscillum	uncultured_organism	20	33	0	45	143	0	0	0	0	0	0	0	67	73	39	18	14	0	40	26	0	27	0	48	0	0	0	0	0	0	0	0	0	20	17	0	0	76	0	22	0
49a0aa84d7f1d13e9842c9ab8abccbfc	ASV1652	Bacteria	Bacteroidota	Bacteroidia	Cytophagales	Cyclobacteriaceae	Marinoscillum	uncultured_organism	0	0	45	0	0	77	0	29	0	14	25	49	0	0	0	0	0	0	0	0	30	0	51	0	0	50	0	65	39	49	73	7	15	0	0	0	0	0	22	0	27
48e21f9a609620d3184d377ec24a6ae9	ASV1648	Bacteria	Bacteroidota	Bacteroidia	Cytophagales	Cyclobacteriaceae	Marinoscillum	uncultured_Flammeovirgaceae	5	0	32	16	16	22	18	0	0	0	14	12	20	0	0	0	0	0	0	0	0	0	0	6	0	0	11	21	0	0	23	0	0	0	0	0	0	20	0	9	0
7df07864932def3f9ebc552cdc66dab7	ASV1023	Bacteria	Bacteroidota	Bacteroidia	Cytophagales	Cyclobacteriaceae	Marinoscillum	uncultured_organism	0	0	65	0	0	31	0	0	0	0	0	0	0	0	29	0	0	20	0	0	0	0	0	27	0	0	0	0	0	0	14	0	0	0	0	13	12	0	0	0	0
1e17509a8ca75ac28b3c2dd04bb9f974	ASV243	Bacteria	Bacteroidota	Bacteroidia	Cytophagales	Cyclobacteriaceae	Marinoscillum	uncultured_Bacteroidetes	0	0	0	0	0	0	0	0	0	0	0	0	0	0	0	0	0	0	0	0	0	0	0	0	0	26	0	43	0	78	0	0	0	0	0	0	0	0	0	0	0
a7d75fc5e3055dc7ed7a44086ede0c42	ASV3440	Bacteria	Bacteroidota	Bacteroidia	Cytophagales	Cyclobacteriaceae	Marinoscillum	NA	0	0	36	11	0	0	23	0	19	0	0	0	17	0	0	0	0	15	0	0	0	0	0	0	0	0	0	0	0	0	0	0	0	0	0	0	0	0	0	0	0
fa434b6d8550e82c27d978c9921dec94	ASV5283	Bacteria	Bacteroidota	Bacteroidia	Cytophagales	Cyclobacteriaceae	Marinoscillum	NA	0	0	0	0	0	0	0	0	0	0	0	0	0	0	0	0	0	0	0	0	0	0	0	0	0	59	0	0	0	0	0	0	32	35	0	0	0	0	0	0	0
d79763bdd008d4d3935008755531ab89	ASV4556	Bacteria	Bacteroidota	Bacteroidia	Cytophagales	Cyclobacteriaceae	Marinoscillum	NA	0	0	0	0	0	0	0	18	0	0	0	0	0	0	0	0	0	0	0	0	0	0	0	0	0	7	0	0	13	0	0	11	0	0	0	0	0	0	0	0	0
3e7d3bedf9cfd4a85cf2cc4beae90050	ASV500	Bacteria	Bacteroidota	Bacteroidia	Cytophagales	Microscillaceae	Microscilla	NA	0	0	0	13	0	0	0	0	0	0	0	0	0	0	0	51	7	0	0	0	0	0	0	0	0	0	0	0	0	0	0	0	0	0	24	98	0	0	0	0	0
2eadaee12818b9710e82281ce9e5fc16	ASV374	Bacteria	Bacteroidota	Bacteroidia	Cytophagales	Microscillaceae	Microscilla	NA	0	0	12	0	0	0	7	4	0	0	0	0	0	0	0	0	0	0	0	0	10	4	0	0	0	15	0	12	0	37	0	0	12	0	0	0	0	0	5	0	0
45427d2fffda582fb8abd0efb656b94b	ASV2947	Bacteria	Bacteroidota	Bacteroidia	Cytophagales	Microscillaceae	Microscilla	NA	0	0	19	0	3	0	0	0	0	0	0	0	4	0	0	8	0	12	0	0	0	0	0	0	0	0	0	0	0	0	3	0	0	0	0	0	0	0	0	0	0
664a0bf6e9d6e57b2ea9048b3752f1c4	ASV2388	Bacteria	Bacteroidota	Bacteroidia	Cytophagales	Microscillaceae	Microscilla	NA	0	0	0	0	0	0	0	0	0	0	0	0	0	0	0	0	0	0	0	0	0	0	0	0	0	0	0	0	0	37	0	0	0	0	0	0	0	0	0	0	0
c15139e327db5444e26d3fa04fc7e16e	ASV4233	Bacteria	Bacteroidota	Bacteroidia	Cytophagales	Cyclobacteriaceae	NA	NA	34	33	95	0	108	92	0	0	0	0	0	87	68	101	54	34	38	69	43	56	37	57	87	30	63	0	0	22	0	0	139	24	0	0	16	22	27	91	0	43	24
45790929a8c4571e7616de3b96734fd7	ASV3297	Bacteria	Bacteroidota	Bacteroidia	Cytophagales	Cyclobacteriaceae	NA	NA	92	42	129	59	0	26	55	0	0	0	33	65	44	27	26	0	47	69	0	30	49	51	24	58	8	0	0	54	0	0	49	0	0	0	60	57	48	42	0	14	14
a5af09bc22db7fd4651b21b99c19e388	ASV3421	Bacteria	Bacteroidota	Bacteroidia	Cytophagales	Cyclobacteriaceae	NA	NA	0	10	9	12	0	9	13	0	0	0	0	0	12	0	0	4	9	21	0	0	19	0	0	49	0	14	0	0	0	15	13	0	0	0	46	75	9	7	0	5	0
c46a227f83ad490d332066d2fbdbfd3f	ASV4137	Bacteria	Bacteroidota	Bacteroidia	Cytophagales	Cyclobacteriaceae	NA	NA	0	0	0	0	0	0	44	38	0	17	0	0	0	0	0	0	0	0	0	0	0	0	0	0	0	38	0	0	0	0	0	0	23	20	0	0	0	0	0	0	0
be23d80e991d3eac92b04a843abfba10	ASV3985	Bacteria	Bacteroidota	Bacteroidia	Cytophagales	NA	NA	NA	0	0	36	0	0	0	0	0	0	5	0	0	10	0	0	0	0	15	33	0	0	0	0	0	20	0	9	0	0	0	0	0	0	2	0	0	0	0	0	0	27
c3d324c43eface84414921d59a9ff22b	ASV4052	Bacteria	Bacteroidota	Bacteroidia	Cytophagales	Cyclobacteriaceae	NA	NA	0	0	26	10	7	10	0	0	0	0	0	13	0	0	8	0	0	0	0	0	7	0	10	0	0	0	0	0	0	0	21	0	0	0	0	13	0	8	0	0	0
e472a071acec0552b6300a28e76173ad	ASV4886	Bacteria	Bacteroidota	Bacteroidia	Cytophagales	NA	NA	NA	0	0	0	0	45	0	0	0	0	0	0	25	0	0	0	0	0	0	0	0	0	0	0	0	0	0	0	0	0	53	0	0	0	0	0	0	0	0	0	0	0
52860be11185ab313aeb817d65835fef	ASV2964	Bacteria	Bacteroidota	Bacteroidia	Cytophagales	Cyclobacteriaceae	NA	NA	0	0	0	0	0	0	0	0	0	0	0	0	0	0	0	0	0	0	0	0	0	0	0	0	0	0	42	39	0	30	0	0	0	0	0	0	0	0	0	0	0
ba43e99a8ce4c43268977e6d378ee553	ASV3902	Bacteria	Bacteroidota	Bacteroidia	Cytophagales	Cyclobacteriaceae	NA	NA	0	0	0	0	8	0	0	3	0	0	0	9	0	16	0	0	0	0	0	0	0	0	6	0	0	9	0	0	0	0	23	0	0	0	0	0	0	4	0	0	0
9bd39369cd2391d518b2723ae8b6fc34	ASV1249	Bacteria	Bacteroidota	Bacteroidia	Cytophagales	Cyclobacteriaceae	NA	NA	0	0	0	0	0	0	0	0	33	0	0	0	0	0	0	0	0	0	0	0	0	0	0	0	0	0	0	0	55	0	0	14	0	0	0	0	0	0	0	0	0
b07b84c901fd55c489d96da376b95da3	ASV3745	Bacteria	Bacteroidota	Bacteroidia	Cytophagales	Cyclobacteriaceae	NA	NA	5	0	0	6	0	0	0	20	0	0	0	0	0	5	0	0	0	0	0	0	0	7	0	17	0	11	0	7	0	0	0	0	8	0	0	0	0	6	5	0	0
325c4aeaf4d27d99d9e9b8fa41e42907	ASV2216	Bacteria	Bacteroidota	Bacteroidia	Cytophagales	NA	NA	NA	0	0	0	0	0	0	0	0	0	0	0	0	0	0	0	0	0	0	0	0	0	0	0	0	0	0	0	0	0	0	0	0	0	0	71	0	0	0	0	0	0
43ddec08608f68ef81c5270494040896	ASV1612	Bacteria	Bacteroidota	Bacteroidia	Cytophagales	Cyclobacteriaceae	NA	NA	0	0	0	0	0	0	0	0	0	0	0	0	0	0	0	8	3	10	0	0	4	0	0	10	0	0	0	0	0	0	0	0	0	0	0	10	0	0	0	0	0
ab00c2992da93fcd2b703bbd2a9a023b	ASV3595	Bacteria	Bacteroidota	Bacteroidia	Cytophagales	Cyclobacteriaceae	NA	NA	0	0	0	49	0	0	0	0	0	0	0	0	0	0	0	0	0	0	0	0	0	0	0	0	0	0	0	0	0	0	0	0	0	0	0	0	0	0	0	0	0
243cb9389528dd0cf614a517b29cb960	ASV2163	Bacteria	Bacteroidota	Bacteroidia	Cytophagales	Cyclobacteriaceae	NA	NA	0	0	0	0	0	0	0	0	0	0	0	0	0	0	0	0	0	0	0	0	0	0	0	0	0	0	0	0	0	0	0	0	0	0	0	0	0	26	0	0	0
c5c0afeaa7b29994dd32b17e6579dc06	ASV4071	Bacteria	Bacteroidota	Bacteroidia	Cytophagales	Cyclobacteriaceae	NA	NA	0	0	0	0	0	0	0	0	0	0	0	0	0	0	26	0	0	0	0	0	0	0	0	0	0	0	0	0	0	0	0	0	0	0	0	0	0	0	0	0	0
07874203ecb502c88816907b445832d7	ASV3259	Bacteria	Bacteroidota	Bacteroidia	Cytophagales	NA	NA	NA	0	0	0	0	0	0	0	0	0	0	0	0	0	0	0	0	0	0	0	0	0	0	0	0	0	0	0	0	21	0	0	0	0	0	0	0	0	0	0	0	0
ce5c9ab316d593b84212e5cf8b006fdb	ASV4354	Bacteria	Bacteroidota	Bacteroidia	Cytophagales	Cyclobacteriaceae	Reichenbachiella	uncultured_bacterium	61	35	259	75	385	156	71	34	42	9	0	198	123	186	66	65	78	105	52	37	125	160	154	54	77	106	0	92	68	72	252	42	10	15	74	114	90	85	30	24	41
872e9ac8f9570447f5a12134f5ae71d1	ASV2498	Bacteria	Bacteroidota	Bacteroidia	Cytophagales	Cyclobacteriaceae	Reichenbachiella	uncultured_bacterium	99	44	176	83	199	105	86	77	80	53	55	145	69	71	141	83	121	137	71	91	149	142	100	47	43	100	17	121	53	70	169	41	30	28	83	112	86	94	64	40	36
bcefa705f537fa1735dadaae2447fdf4	ASV3959	Bacteria	Bacteroidota	Bacteroidia	Cytophagales	Cyclobacteriaceae	Reichenbachiella	NA	48	12	39	45	51	37	18	66	39	23	21	27	23	24	36	100	17	103	17	32	61	25	67	28	28	26	14	25	7	19	112	38	18	18	12	58	134	53	26	29	25
93534f0a8264ca1a7acf8d41db7f0eec	ASV3039	Bacteria	Bacteroidota	Bacteroidia	Cytophagales	Cyclobacteriaceae	Reichenbachiella	NA	100	43	57	46	120	50	0	12	0	0	16	38	30	36	58	37	41	61	18	66	34	56	93	58	23	0	21	0	0	0	150	0	0	0	40	40	82	82	20	27	38
952575b07fc250e293184a6316a241ab	ASV3192	Bacteria	Bacteroidota	Bacteroidia	Cytophagales	Cyclobacteriaceae	Reichenbachiella	uncultured_Flammeovirgaceae	23	21	50	20	101	31	0	0	0	0	0	23	20	18	29	80	23	79	9	32	65	21	36	24	0	0	0	0	0	0	48	0	0	0	15	40	42	61	0	9	19
f42323474585dc63151cf989fbe560bd	ASV5267	Bacteria	Bacteroidota	Bacteroidia	Cytophagales	Cyclobacteriaceae	Reichenbachiella	uncultured_bacterium	0	20	23	15	11	21	37	34	26	0	40	27	32	10	33	7	11	20	12	0	18	5	0	44	0	0	0	20	65	67	17	27	12	25	0	0	0	15	29	0	0
f332aacb938140f30d83ea28a0c64277	ASV5213	Bacteria	Bacteroidota	Bacteroidia	Cytophagales	Cyclobacteriaceae	Reichenbachiella	uncultured_bacterium	0	27	22	0	17	9	0	19	0	0	0	18	0	0	23	15	0	11	19	9	0	0	29	10	9	0	0	0	0	0	44	0	9	0	51	0	14	13	0	16	13
9a06cd6e5a32ddfef13b87acc49b2f64	ASV1212	Bacteria	Bacteroidota	Bacteroidia	Cytophagales	Cyclobacteriaceae	Reichenbachiella	NA	17	0	0	13	55	0	0	0	0	0	0	0	0	0	0	20	9	15	0	18	28	27	21	17	0	0	0	0	0	10	59	0	0	0	0	20	27	21	0	19	0
e7b947548f61c6cb1a8bfff154613777	ASV4797	Bacteria	Bacteroidota	Bacteroidia	Cytophagales	Cyclobacteriaceae	Reichenbachiella	NA	0	0	0	0	0	0	0	0	0	0	0	0	0	0	0	0	0	0	4	0	0	0	0	15	0	0	0	0	0	170	0	4	0	0	0	0	0	0	0	0	0
46931a3c0dcdf8171c109699de9864fc	ASV2951	Bacteria	Bacteroidota	Bacteroidia	Cytophagales	Cyclobacteriaceae	Reichenbachiella	uncultured_bacterium	0	0	0	0	0	0	0	0	0	0	0	0	0	0	0	0	0	0	0	0	0	0	0	0	0	34	0	22	0	0	0	0	0	0	0	0	0	0	0	0	0
e8fe9bbe29afd177ef22cc7b68ea48f2	ASV4812	Bacteria	Bacteroidota	Bacteroidia	Cytophagales	Cyclobacteriaceae	Reichenbachiella	Reichenbachiella_versicolor	0	0	0	0	0	0	16	31	0	0	0	0	0	0	0	0	0	0	0	0	0	0	0	0	0	0	0	0	0	0	0	0	0	0	0	0	0	0	0	0	0
d7f42e31115097c062334879ebecc381	ASV4462	Bacteria	Bacteroidota	Bacteroidia	Cytophagales	Cyclobacteriaceae	Reichenbachiella	uncultured_bacterium	0	0	0	0	0	0	0	16	0	0	0	0	0	0	0	0	0	0	0	0	0	0	0	0	0	0	0	0	0	0	0	0	0	0	0	0	0	0	0	0	0
542e68c1c2857d31d349e2158720d00e	ASV2329	Bacteria	Bacteroidota	Bacteroidia	Cytophagales	Cyclobacteriaceae	Reichenbachiella	uncultured_Flammeovirgaceae	0	0	0	0	0	0	0	0	0	0	0	0	0	0	0	0	10	0	0	0	0	0	0	17	0	0	0	0	0	0	0	0	0	0	0	0	0	0	0	0	0
e8aab26f543bc8490996f2f231c1bd12	ASV4807	Bacteria	Bacteroidota	Bacteroidia	Cytophagales	Cyclobacteriaceae	Reichenbachiella	uncultured_Flexibacteraceae	0	0	0	0	0	0	10	15	0	0	0	0	0	0	0	0	0	0	0	0	0	0	0	0	0	0	0	0	0	0	0	0	0	0	0	0	0	0	0	0	0
45204ac15e63ada2f6cec0ee688ce46b	ASV2946	Bacteria	Bacteroidota	Bacteroidia	Cytophagales	Cytophagaceae	Rhodocytophaga	NA	0	15	0	0	0	0	0	0	10	0	0	0	9	0	0	0	0	37	0	0	0	0	0	0	0	0	0	0	0	0	0	0	0	13	0	0	0	0	0	0	0
dc8e6dc27b353b752d90ca5b42c133e4	ASV4625	Bacteria	Bacteroidota	Bacteroidia	Cytophagales	Flammeovirgaceae	Sediminitomix	Sediminitomix_flava	0	0	0	0	0	0	0	0	0	0	0	0	0	0	0	0	0	0	0	0	0	0	0	0	0	0	0	0	0	0	0	0	0	0	0	0	0	0	23	0	0
f2db221198a472700c6b582f79d1c36e	ASV5092	Bacteria	Bacteroidota	Bacteroidia	Cytophagales	Amoebophilaceae	uncultured	NA	0	0	933	46	13	7	0	0	0	0	0	200	0	1559	0	100	0	274	0	235	0	198	8	53	35	0	0	0	0	0	564	0	0	0	0	208	0	436	0	0	0
e7a9164d0a050056695424b65eed3bb5	ASV4794	Bacteria	Bacteroidota	Bacteroidia	Cytophagales	Cyclobacteriaceae	uncultured	uncultured_bacterium	162	91	142	221	114	68	83	70	0	48	65	168	196	68	125	154	102	145	37	214	160	105	110	77	76	53	37	96	48	104	163	29	0	42	28	68	76	182	39	135	74
395d17e822acfb8bf46bece13d547e3c	ASV2254	Bacteria	Bacteroidota	Bacteroidia	Cytophagales	Amoebophilaceae	uncultured	uncultured_organism	53	58	266	233	182	138	24	29	0	0	11	379	180	139	215	101	50	104	142	79	41	190	404	68	67	0	0	0	9	0	165	0	0	21	24	39	57	153	0	86	53
2e3cfb44f66c6f878d0e792fcd5b861d	ASV359	Bacteria	Bacteroidota	Bacteroidia	Cytophagales	Cyclobacteriaceae	uncultured	uncultured_Flexibacteraceae	81	20	85	71	102	97	9	0	0	0	11	97	70	55	61	49	58	143	44	177	58	103	78	55	98	8	16	9	13	9	100	0	7	19	34	63	129	105	23	38	34
29b3adcdb1a67dd4de2882b26622b007	ASV1503	Bacteria	Bacteroidota	Bacteroidia	Cytophagales	Amoebophilaceae	uncultured	uncultured_bacterium	0	0	0	0	0	0	57	21	0	0	28	46	20	21	120	0	0	0	27	0	0	0	0	551	98	252	8	141	47	175	0	134	11	353	0	0	0	0	27	24	6
e947aa7df4e0d52cfdea521fcb9982e0	ASV4901	Bacteria	Bacteroidota	Bacteroidia	Cytophagales	Amoebophilaceae	uncultured	uncultured_bacterium	0	0	0	0	0	0	26	89	24	0	323	0	0	0	0	0	0	0	38	0	0	0	0	0	0	35	24	91	247	516	0	20	0	464	0	0	0	0	177	0	0
4e67ed32545b9a550f3ef7946e9b1d74	ASV633	Bacteria	Bacteroidota	Bacteroidia	Cytophagales	Cyclobacteriaceae	uncultured	uncultured_Bacteroidetes	55	36	53	54	51	62	96	70	24	0	47	27	73	45	32	18	32	47	41	46	15	62	51	28	31	55	11	88	45	67	94	0	38	30	0	29	14	26	37	21	25
2994d2cd76f1c390a1c56cdbed879053	ASV2630	Bacteria	Bacteroidota	Bacteroidia	Cytophagales	Amoebophilaceae	uncultured	uncultured_organism	12	29	81	70	25	32	85	125	24	37	56	38	52	20	37	43	17	7	38	19	13	33	26	25	0	197	8	41	44	84	63	21	41	41	17	0	0	30	109	31	20
094374be9f3ed31b4d681000473f37c1	ASV3042	Bacteria	Bacteroidota	Bacteroidia	Cytophagales	Cyclobacteriaceae	uncultured	uncultured_deep-sea	41	26	0	40	35	30	76	81	30	37	41	0	30	0	47	65	34	65	42	46	0	42	44	29	40	74	35	66	39	28	37	26	35	91	19	36	38	73	53	38	38
1f25e29b102a81d578761757583cbce6	ASV260	Bacteria	Bacteroidota	Bacteroidia	Cytophagales	Amoebophilaceae	uncultured	uncultured_bacterium	0	0	0	0	0	0	24	0	0	0	0	8	0	0	0	0	0	17	0	0	0	0	0	0	0	0	0	0	0	594	0	678	0	0	0	0	0	0	0	22	28
a8e0c794bda932db9ee1119df5e3c8b7	ASV3454	Bacteria	Bacteroidota	Bacteroidia	Cytophagales	Amoebophilaceae	uncultured	uncultured_Flexibacteraceae	155	81	38	230	0	0	0	0	0	0	0	70	15	33	0	0	31	317	0	0	20	20	0	0	51	0	0	0	0	0	0	14	0	0	0	34	0	0	0	0	144
a10be30e0152624eae742329274017fd	ASV3465	Bacteria	Bacteroidota	Bacteroidia	Cytophagales	Cyclobacteriaceae	uncultured	uncultured_bacterium	56	47	59	92	56	0	30	23	7	0	21	24	31	0	31	46	42	33	17	46	70	49	31	68	29	0	0	22	0	0	63	13	0	13	13	25	28	45	18	23	15
9eb91b9b7e3694eb6688440666d62fe1	ASV1324	Bacteria	Bacteroidota	Bacteroidia	Cytophagales	Amoebophilaceae	uncultured	NA	0	0	0	0	0	0	55	38	0	0	84	0	0	0	0	0	0	0	0	0	0	0	0	0	0	81	23	139	71	539	0	66	14	42	0	0	0	0	17	0	0
9b39e93a45d7025acb17b8d283d23dc5	ASV1242	Bacteria	Bacteroidota	Bacteroidia	Cytophagales	Amoebophilaceae	uncultured	uncultured_Flexibacteraceae	116	99	0	0	52	0	0	0	0	0	0	0	0	0	0	98	0	47	0	70	0	83	0	0	0	0	0	0	286	0	0	0	0	0	0	0	54	70	0	42	0
2ce81346db8065c5a03ae68ba3fc1e01	ASV339	Bacteria	Bacteroidota	Bacteroidia	Cytophagales	Amoebophilaceae	uncultured	uncultured_Flexibacteraceae	0	0	0	0	0	0	144	68	0	32	101	0	0	0	19	0	0	0	32	0	0	0	0	0	0	0	86	127	131	193	0	33	0	0	0	0	0	0	17	0	26
91fe8d01c5fb18ebbb01212eb6737aa3	ASV2022	Bacteria	Bacteroidota	Bacteroidia	Cytophagales	Amoebophilaceae	uncultured	uncultured_organism	0	0	0	0	0	0	95	109	44	17	27	0	0	0	0	0	0	0	18	0	0	0	0	0	0	64	19	114	61	89	0	24	39	70	0	0	0	0	68	0	0
a99a2afd82e0254abf7a639c0e7a7180	ASV3506	Bacteria	Bacteroidota	Bacteroidia	Cytophagales	Cyclobacteriaceae	uncultured	uncultured_deep-sea	0	0	0	0	77	0	87	58	27	40	43	0	28	15	25	34	11	24	59	0	0	0	0	22	0	0	24	30	25	44	28	0	20	0	0	0	0	0	69	0	0
391ab488e176465ed35c3a2ba0f3b30b	ASV2249	Bacteria	Bacteroidota	Bacteroidia	Cytophagales	Amoebophilaceae	uncultured	uncultured_Flexibacteraceae	0	0	0	0	0	0	0	0	0	0	73	0	0	0	0	0	33	17	0	0	0	0	0	0	0	74	0	99	156	257	0	0	40	26	0	0	0	0	0	0	0
917acb62137a322b22f74fb7439e98fd	ASV2517	Bacteria	Bacteroidota	Bacteroidia	Cytophagales	Amoebophilaceae	uncultured	uncultured_bacterium	123	43	114	52	0	5	0	38	54	0	0	15	0	22	0	0	0	0	24	0	0	6	59	27	0	26	0	0	0	50	5	14	0	0	0	0	0	40	42	7	0
ac82de12cebd3ccaeac0dd300efe9ae5	ASV3627	Bacteria	Bacteroidota	Bacteroidia	Cytophagales	Cyclobacteriaceae	uncultured	uncultured_bacterium	0	40	36	55	11	24	13	0	0	0	13	0	0	0	52	45	35	51	0	26	84	0	0	11	0	0	0	0	0	35	18	0	7	6	20	29	43	33	8	22	0
cb66162317d755f09e7b232498370f6a	ASV4298	Bacteria	Bacteroidota	Bacteroidia	Cytophagales	Amoebophilaceae	uncultured	uncultured_bacterium	0	0	0	0	0	0	0	0	0	0	0	0	0	0	0	0	0	0	0	0	0	0	0	0	0	0	0	0	131	230	0	0	7	0	0	0	0	0	331	0	0
0f6c180c8e59204fa836d8099947e853	ASV113	Bacteria	Bacteroidota	Bacteroidia	Cytophagales	Amoebophilaceae	uncultured	uncultured_bacterium	0	0	115	0	0	0	130	0	0	0	28	0	0	0	0	36	0	0	0	0	0	0	0	0	0	0	0	106	42	126	0	0	0	0	0	0	0	0	0	0	0
521c20fbb271d65e51dc55b6a90da507	ASV2315	Bacteria	Bacteroidota	Bacteroidia	Cytophagales	Amoebophilaceae	uncultured	uncultured_bacterium	0	0	4	0	0	0	0	0	0	0	0	0	0	0	0	6	0	0	0	0	0	0	0	0	0	0	0	0	76	195	0	0	0	0	0	0	0	0	306	0	0
10086f29dd6f30cadc813b6d602dc763	ASV2863	Bacteria	Bacteroidota	Bacteroidia	Cytophagales	Cyclobacteriaceae	uncultured	uncultured_bacterium	20	32	14	31	0	29	0	25	0	0	0	12	0	0	20	17	14	33	10	29	43	44	11	19	20	15	0	11	0	0	0	0	0	0	15	16	25	0	13	30	15
c222d5e79a4c78b56bcc38031bd09b6b	ASV4177	Bacteria	Bacteroidota	Bacteroidia	Cytophagales	Cyclobacteriaceae	uncultured	uncultured_sediment	0	0	0	0	0	0	51	47	30	19	12	0	0	0	0	0	0	0	21	0	0	0	0	0	0	82	31	53	59	32	0	41	23	23	0	0	0	0	47	0	0
b7574c811642ae3b30d4b273a5961337	ASV3865	Bacteria	Bacteroidota	Bacteroidia	Cytophagales	Amoebophilaceae	uncultured	uncultured_Flexibacteraceae	0	0	0	0	0	0	0	75	0	0	65	0	0	0	0	0	0	0	0	0	0	0	0	0	0	31	37	0	65	150	0	32	0	50	0	0	0	0	63	0	0
35db5ca696e5a958630229251c72ee47	ASV1555	Bacteria	Bacteroidota	Bacteroidia	Cytophagales	Cyclobacteriaceae	uncultured	uncultured_bacterium	0	0	32	24	13	23	0	0	0	0	0	20	0	16	33	0	19	34	29	14	25	18	29	0	37	0	0	0	0	0	27	0	0	0	0	18	60	31	0	0	0
b81681ac790ad9814858551f92c16ab1	ASV3876	Bacteria	Bacteroidota	Bacteroidia	Cytophagales	Amoebophilaceae	uncultured	uncultured_organism	0	0	0	0	0	0	41	25	23	13	31	0	0	0	0	0	0	0	28	0	0	0	0	0	0	46	0	55	53	0	0	27	0	22	0	0	0	0	70	0	0
e55500d8ad7a995fcafef60c1c2510b1	ASV4919	Bacteria	Bacteroidota	Bacteroidia	Cytophagales	Cyclobacteriaceae	uncultured	uncultured_bacterium	0	0	0	26	0	0	0	0	33	0	45	0	0	0	34	38	0	39	0	0	0	17	22	0	0	0	0	0	0	0	0	25	0	25	15	31	0	0	38	0	17
4366b8a819be9bad810bab2b49664ea0	ASV2665	Bacteria	Bacteroidota	Bacteroidia	Cytophagales	Amoebophilaceae	uncultured	uncultured_bacterium	0	0	0	0	0	0	0	0	0	0	0	0	0	0	0	0	0	0	0	0	348	0	0	0	0	0	0	0	0	0	0	0	0	0	0	0	0	0	0	13	0
1d856b73b93443bfee595029ddc7b902	ASV208	Bacteria	Bacteroidota	Bacteroidia	Cytophagales	Cyclobacteriaceae	uncultured	uncultured_Bacteroidetes	17	7	17	17	0	4	0	8	0	0	0	24	9	16	4	19	0	14	10	16	8	8	18	0	13	0	0	10	0	0	18	0	8	8	0	15	13	15	21	5	9
7089a771c3c99b6600b46ef4d6644d3d	ASV2757	Bacteria	Bacteroidota	Bacteroidia	Cytophagales	Amoebophilaceae	uncultured	uncultured_bacterium	102	0	0	0	0	0	0	0	0	0	0	0	12	10	0	0	11	0	0	31	40	37	0	0	0	0	0	0	0	11	8	0	0	8	0	0	0	0	0	8	4
db4e75d33572ed1bb0cffdf41f13562a	ASV4605	Bacteria	Bacteroidota	Bacteroidia	Cytophagales	Cyclobacteriaceae	uncultured	uncultured_bacterium	0	0	0	0	0	0	31	30	25	0	29	0	0	0	0	0	0	0	0	0	0	0	0	0	0	15	14	37	0	0	0	28	12	44	0	0	0	0	49	0	0
bdd700e05a7c7b5dff5e3e7f6a441bc3	ASV3978	Bacteria	Bacteroidota	Bacteroidia	Cytophagales	Amoebophilaceae	uncultured	uncultured_bacterium	59	0	0	0	0	0	0	0	4	0	0	0	0	8	0	0	14	0	0	34	0	44	0	0	5	0	0	0	0	61	19	0	0	0	0	0	0	0	0	10	8
52bc94f462aad50162869e9cf0c08001	ASV1673	Bacteria	Bacteroidota	Bacteroidia	Cytophagales	Amoebophilaceae	uncultured	NA	0	0	0	0	0	0	19	31	19	9	30	0	0	0	7	9	0	0	21	0	0	2	0	4	0	9	27	40	0	57	0	0	0	7	0	0	0	0	0	0	0
524085b953653b7fd09ff612bc1f5cbd	ASV3133	Bacteria	Bacteroidota	Bacteroidia	Cytophagales	Amoebophilaceae	uncultured	uncultured_Flexibacteraceae	0	0	0	0	0	0	0	0	0	0	97	0	0	0	0	0	0	0	0	46	36	0	0	0	99	0	0	0	0	0	0	0	0	0	0	0	0	0	0	0	0
f868ca378e3f9c8eb19552a9f07d99a9	ASV5230	Bacteria	Bacteroidota	Bacteroidia	Cytophagales	Cyclobacteriaceae	uncultured	uncultured_bacterium	0	0	0	0	18	0	22	21	17	15	0	0	13	0	0	0	0	0	10	0	0	0	0	0	0	0	0	0	27	21	0	24	10	0	0	0	0	0	52	0	0
5cd31734b491190a317693f89216273a	ASV741	Bacteria	Bacteroidota	Bacteroidia	Cytophagales	Cyclobacteriaceae	uncultured	uncultured_bacterium	28	16	42	0	18	0	0	0	0	0	0	20	25	22	0	0	0	0	0	28	0	0	33	12	0	0	0	0	0	0	0	0	0	0	0	0	10	0	0	0	0
5235a38b3a972e4d46bd5267bdb1b979	ASV2695	Bacteria	Bacteroidota	Bacteroidia	Cytophagales	Cyclobacteriaceae	uncultured	NA	9	0	0	0	0	0	46	0	24	0	0	0	0	0	0	0	0	16	0	0	0	0	0	0	0	19	20	21	0	0	0	0	0	0	0	19	0	0	56	0	0
1acf5840e351d48d17867ded1770fb0d	ASV148	Bacteria	Bacteroidota	Bacteroidia	Cytophagales	Amoebophilaceae	uncultured	NA	0	0	0	0	0	0	43	0	16	0	0	0	0	0	0	0	0	0	0	0	0	0	0	0	0	0	14	83	0	0	0	0	0	88	0	0	0	0	0	0	0
adecbc1d2c900646b0afa73667b5560d	ASV3655	Bacteria	Bacteroidota	Bacteroidia	Cytophagales	Cyclobacteriaceae	uncultured	uncultured_bacterium	0	0	0	0	0	0	0	0	0	0	21	0	0	0	0	0	0	0	20	0	0	0	0	0	0	24	10	16	49	0	0	10	11	23	0	0	0	0	60	0	0
6d542983a18093b6da78371de62f250a	ASV880	Bacteria	Bacteroidota	Bacteroidia	Cytophagales	Amoebophilaceae	uncultured	uncultured_Flexibacteraceae	0	0	0	0	0	0	0	0	0	0	0	0	0	0	0	0	0	0	0	58	0	0	0	0	0	0	0	0	0	136	0	0	0	0	0	0	0	0	32	0	0
296e28d8e46e6785b84d819d4a99c2e5	ASV2197	Bacteria	Bacteroidota	Bacteroidia	Cytophagales	Amoebophilaceae	uncultured	uncultured_Flexibacteraceae	0	0	85	0	0	0	50	0	0	0	0	0	0	0	0	38	0	0	0	0	0	0	0	0	0	10	0	0	0	0	0	0	0	0	0	0	0	0	0	0	0
06cc7a7e1eb0f408adc2583fa47e8f90	ASV863	Bacteria	Bacteroidota	Bacteroidia	Cytophagales	Amoebophilaceae	uncultured	uncultured_bacterium	0	0	41	0	0	0	69	0	0	0	0	8	0	0	0	35	0	0	0	0	0	0	0	0	0	0	0	0	0	22	0	0	0	0	0	0	0	0	12	0	0
f6908c1888c006e6c471942fe93815a7	ASV5238	Bacteria	Bacteroidota	Bacteroidia	Cytophagales	Amoebophilaceae	uncultured	uncultured_bacterium	0	0	0	0	0	0	0	0	89	0	0	0	0	3	0	0	8	0	107	0	0	0	0	0	0	0	0	0	0	0	0	0	3	0	0	0	0	0	0	0	0
9dc308e800f34deaffb204ed89db2e82	ASV1293	Bacteria	Bacteroidota	Bacteroidia	Cytophagales	Amoebophilaceae	uncultured	uncultured_Flexibacteraceae	14	0	0	0	0	0	0	0	0	0	0	0	5	0	0	0	0	0	0	0	187	0	0	0	0	0	0	0	0	0	0	0	0	0	0	0	0	0	0	0	0
70ac5a6fdbea23c504db78a05e712dfd	ASV1821	Bacteria	Bacteroidota	Bacteroidia	Cytophagales	Cyclobacteriaceae	uncultured	uncultured_sediment	0	0	0	0	0	0	25	17	8	10	0	0	0	0	0	0	0	0	0	0	0	0	0	0	0	27	0	26	26	0	0	11	15	9	0	0	0	0	28	0	0
e7eb6b73e00835ff13fc67e512d5beb8	ASV4801	Bacteria	Bacteroidota	Bacteroidia	Cytophagales	Amoebophilaceae	uncultured	uncultured_bacterium	0	0	0	0	0	0	0	0	29	12	0	0	0	0	0	0	0	0	0	0	0	0	0	0	0	0	39	73	0	0	0	0	0	47	0	0	0	0	0	0	0
9fd7247b6d4e887a7bfb7d69df9d37a9	ASV1350	Bacteria	Bacteroidota	Bacteroidia	Cytophagales	Amoebophilaceae	uncultured	uncultured_organism	0	0	0	0	0	0	15	61	0	0	16	0	0	0	0	0	0	0	0	0	0	0	0	0	0	0	0	20	34	0	0	0	0	33	0	0	0	0	0	0	0
699c580fb53b2c1ddba893a19a509cfa	ASV2409	Bacteria	Bacteroidota	Bacteroidia	Cytophagales	Amoebophilaceae	uncultured	uncultured_Flexibacteraceae	0	0	0	0	0	0	0	0	0	0	0	0	0	0	0	0	0	0	0	0	0	0	0	0	0	0	75	0	0	103	0	0	0	0	0	0	0	0	0	0	0
99f52e1a2f0c03cb3344b5fca8fbc567	ASV2095	Bacteria	Bacteroidota	Bacteroidia	Cytophagales	Amoebophilaceae	uncultured	NA	0	10	0	35	0	0	0	0	27	0	0	0	0	0	0	0	0	29	0	0	11	0	0	0	0	0	0	0	0	0	0	0	0	0	0	0	5	0	0	0	0
9f80008b23a97eb76bdc01153bcb8cac	ASV1343	Bacteria	Bacteroidota	Bacteroidia	Cytophagales	Amoebophilaceae	uncultured	uncultured_bacterium	0	0	0	0	0	0	29	0	0	0	9	0	0	0	0	0	0	0	0	0	0	0	0	0	0	0	0	0	0	135	0	0	0	0	0	0	0	0	0	0	0
48e486cd93c05af01af057b41609d0a1	ASV1649	Bacteria	Bacteroidota	Bacteroidia	Cytophagales	Cyclobacteriaceae	uncultured	uncultured_deep-sea	0	0	0	24	0	0	43	0	0	0	0	0	22	0	0	0	0	0	0	0	0	0	0	0	0	0	0	59	0	0	0	0	0	0	0	0	0	0	0	0	0
9ce7a2346f2897c1b88e503539fb9fd7	ASV1276	Bacteria	Bacteroidota	Bacteroidia	Cytophagales	Amoebophilaceae	uncultured	uncultured_Bacteroidetes	15	74	0	0	9	0	0	0	0	0	0	0	0	0	0	0	0	0	0	32	15	0	0	13	0	0	0	0	0	0	0	0	0	0	0	0	0	0	0	4	0
e814b85ca9bc32bc80478e89d4f65ec0	ASV4895	Bacteria	Bacteroidota	Bacteroidia	Cytophagales	Amoebophilaceae	uncultured	uncultured_bacterium	0	0	0	0	0	0	0	0	0	0	0	0	0	0	0	0	0	0	0	0	0	0	0	0	0	0	0	0	0	0	0	0	0	0	155	0	0	0	0	0	0
07393fa889bdd2c9bbf0927cca14a198	ASV2766	Bacteria	Bacteroidota	Bacteroidia	Cytophagales	Amoebophilaceae	uncultured	uncultured_Flexibacteraceae	51	0	0	0	0	0	0	0	0	0	0	0	0	0	0	10	0	0	0	0	0	0	0	0	0	0	38	0	0	0	0	0	0	47	0	0	0	0	0	0	0
de34523acfa9443190c003a340d36c89	ASV4675	Bacteria	Bacteroidota	Bacteroidia	Cytophagales	Amoebophilaceae	uncultured	uncultured_bacterium	12	10	0	0	59	5	0	0	0	0	0	0	0	0	0	9	0	12	0	13	3	11	5	0	0	0	2	0	0	0	0	0	0	0	0	0	0	0	0	0	0
975ce5f8748babc24cc8e1b4e4389363	ASV2548	Bacteria	Bacteroidota	Bacteroidia	Cytophagales	Amoebophilaceae	uncultured	uncultured_bacterium	0	13	0	69	0	0	0	20	0	0	0	0	0	0	0	0	0	0	0	0	0	0	37	0	0	0	0	0	0	0	0	0	0	0	0	0	0	0	0	0	0
4abfc4710c16b48bb3bca85e7d2be6c0	ASV546	Bacteria	Bacteroidota	Bacteroidia	Cytophagales	Cyclobacteriaceae	uncultured	NA	0	0	0	0	0	0	0	0	0	0	0	0	0	0	0	0	0	0	0	0	0	0	0	0	0	0	0	0	0	0	0	0	0	24	0	0	0	0	0	0	0
ca75744e13becc5d38fcedb8da2c5834	ASV4275	Bacteria	Bacteroidota	Bacteroidia	Cytophagales	Amoebophilaceae	uncultured	uncultured_bacterium	0	0	0	0	0	0	136	0	0	0	0	0	0	0	0	0	0	0	0	0	0	0	0	0	0	0	0	0	0	0	0	0	0	0	0	0	0	0	0	0	0
ab37ccc52fadc3d546c1c9510daae37d	ASV3601	Bacteria	Bacteroidota	Bacteroidia	Cytophagales	Cyclobacteriaceae	uncultured	uncultured_deep-sea	0	0	0	0	21	0	0	18	0	7	8	0	0	0	0	0	0	20	0	11	0	0	0	0	0	15	0	0	0	0	0	0	0	14	0	0	0	0	7	0	0
1c90f162c593d6fda1551759eb3e6f65	ASV184	Bacteria	Bacteroidota	Bacteroidia	Cytophagales	Amoebophilaceae	uncultured	uncultured_bacterium	0	0	0	0	0	0	0	0	0	0	0	0	0	0	0	0	0	0	0	0	0	0	0	0	0	19	0	0	29	0	0	0	0	0	0	0	0	0	86	0	0
2ac8ff1a21705ea6a3a9ceb5202c1c3c	ASV292	Bacteria	Bacteroidota	Bacteroidia	Cytophagales	Amoebophilaceae	uncultured	uncultured_Flexibacteraceae	0	0	0	0	0	0	0	0	19	0	0	0	0	0	0	0	0	0	0	0	0	0	0	0	0	0	0	57	0	0	0	0	0	54	0	0	0	0	0	0	0
bc72d66a9a4cb4fbf9b592dccf123f66	ASV3945	Bacteria	Bacteroidota	Bacteroidia	Cytophagales	Cyclobacteriaceae	uncultured	uncultured_Flammeovirgaceae	0	0	0	0	0	0	0	130	0	0	0	0	0	0	0	0	0	0	0	0	0	0	0	0	0	0	0	0	0	0	0	0	0	0	0	0	0	0	0	0	0
d67e5951dc7215fc01dbcb01cffb5c11	ASV4500	Bacteria	Bacteroidota	Bacteroidia	Cytophagales	Cyclobacteriaceae	uncultured	uncultured_bacterium	0	0	7	0	0	0	0	0	0	0	0	0	0	13	0	4	10	18	0	0	6	0	0	16	0	0	0	0	0	0	14	0	0	0	0	0	19	7	0	13	0
f159fb419a50dc73fdb5e882034f1953	ASV5206	Bacteria	Bacteroidota	Bacteroidia	Cytophagales	Amoebophilaceae	uncultured	uncultured_Flexibacteraceae	0	0	87	24	0	0	0	0	0	0	0	0	0	0	0	0	0	0	0	0	0	0	0	0	0	0	0	0	0	0	0	0	0	0	0	0	0	0	0	0	0
26545908933fef3be3abccfdb8ef8eea	ASV3360	Bacteria	Bacteroidota	Bacteroidia	Cytophagales	Cyclobacteriaceae	uncultured	uncultured_bacterium	0	0	0	0	0	0	0	0	10	0	0	0	0	0	0	0	0	0	0	0	0	0	0	0	0	0	0	0	0	99	0	0	0	0	0	0	0	0	0	0	0
f6aef94830b33cc91108078a5ccdf025	ASV5120	Bacteria	Bacteroidota	Bacteroidia	Cytophagales	Amoebophilaceae	uncultured	NA	0	0	0	0	0	0	0	0	16	0	0	0	0	0	0	0	0	0	0	0	0	0	0	0	0	0	0	0	0	0	0	34	0	0	0	0	0	0	55	0	0
44d46615f3b456e0dcbbbe73a809a143	ASV1619	Bacteria	Bacteroidota	Bacteroidia	Cytophagales	Amoebophilaceae	uncultured	uncultured_bacterium	0	0	0	0	0	0	0	0	0	0	26	0	0	0	0	0	0	0	0	0	16	0	0	0	17	0	0	0	0	0	0	0	0	0	0	0	0	42	0	0	0
b922a6ea135d7c6efed4923c362197ee	ASV3849	Bacteria	Bacteroidota	Bacteroidia	Cytophagales	Amoebophilaceae	uncultured	uncultured_bacterium	0	0	0	82	0	0	0	0	0	0	0	0	15	0	0	0	0	0	0	0	0	0	0	0	0	0	0	0	0	0	0	0	0	0	0	0	0	0	0	0	0
08862a1bf0523c950f18105ce430c23c	ASV2817	Bacteria	Bacteroidota	Bacteroidia	Cytophagales	Amoebophilaceae	uncultured	uncultured_bacterium	0	0	0	0	0	0	0	0	0	0	0	0	0	0	0	0	0	0	0	0	0	0	0	0	0	0	0	0	0	0	0	0	15	74	0	0	0	0	0	0	0
8575df6ceefd3363c774ec93aa5df849	ASV2806	Bacteria	Bacteroidota	Bacteroidia	Cytophagales	Amoebophilaceae	uncultured	NA	0	0	0	0	0	0	25	0	0	0	15	0	13	0	0	0	0	14	0	0	0	0	0	0	0	0	0	20	0	0	0	0	0	0	0	0	0	0	0	0	0
ec120bbe7bb3d7275fdb9adac591c52c	ASV4989	Bacteria	Bacteroidota	Bacteroidia	Cytophagales	Amoebophilaceae	uncultured	uncultured_bacterium	0	0	15	0	0	0	0	0	11	0	31	0	0	0	0	0	4	0	0	0	0	0	0	0	0	0	0	12	0	5	0	0	0	0	0	0	0	0	8	0	0
e664195a03fbb462d2a6ce68e04736e3	ASV4931	Bacteria	Bacteroidota	Bacteroidia	Cytophagales	Cyclobacteriaceae	uncultured	uncultured_deep-sea	0	0	17	0	0	0	0	0	0	0	0	0	0	0	0	0	0	0	0	0	0	23	0	0	0	0	0	0	0	0	0	0	0	0	9	0	24	0	0	0	0
8b4de1535970367e09d5d4d51edfb474	ASV1089	Bacteria	Bacteroidota	Bacteroidia	Cytophagales	Amoebophilaceae	uncultured	uncultured_Flexibacteraceae	0	0	0	0	0	0	8	0	0	0	44	0	0	0	0	0	0	0	5	0	0	0	0	0	0	0	0	0	0	0	0	0	0	13	0	0	0	0	14	0	0
042f12337ad980c1c04bf580071b9c7e	ASV1604	Bacteria	Bacteroidota	Bacteroidia	Cytophagales	Cyclobacteriaceae	uncultured	NA	0	0	0	0	0	8	0	25	0	0	0	0	0	0	0	0	0	0	0	0	0	0	0	0	0	0	0	0	24	0	0	0	0	0	0	0	0	26	0	0	0
2398d89349af365f39ac973e9ec5b665	ASV2610	Bacteria	Bacteroidota	Bacteroidia	Cytophagales	Amoebophilaceae	uncultured	uncultured_deep-sea	0	0	0	0	0	0	0	0	0	0	0	0	0	0	0	0	61	0	0	0	0	0	0	0	0	0	0	0	0	0	0	0	0	0	0	21	0	0	0	0	0
8d03c0695a8688af67fdc0d9c6cb748d	ASV1135	Bacteria	Bacteroidota	Bacteroidia	Cytophagales	Flammeovirgaceae	uncultured	uncultured_Bacteroidetes	0	0	0	0	0	0	0	0	0	0	2	0	0	0	0	0	0	3	0	0	0	0	0	66	0	0	0	0	0	0	0	0	4	0	0	0	0	0	0	3	0
ead9239d85dbf9b88a6597b39992a875	ASV4953	Bacteria	Bacteroidota	Bacteroidia	Cytophagales	Amoebophilaceae	uncultured	NA	38	0	0	0	0	0	0	0	0	0	0	0	0	0	0	0	0	0	0	0	0	0	0	0	0	0	0	0	0	0	33	0	0	0	0	0	0	0	0	0	0
2524841d0ca8f266e61975c6b5fe6cdf	ASV3213	Bacteria	Bacteroidota	Bacteroidia	Cytophagales	Cyclobacteriaceae	uncultured	uncultured_bacterium	0	0	0	7	0	0	0	9	0	0	0	0	0	0	0	0	0	0	7	0	0	0	0	0	0	0	0	0	0	0	0	11	0	20	0	0	0	0	16	0	0
f7defbceda3f565f209e2542c7b23f33	ASV5139	Bacteria	Bacteroidota	Bacteroidia	Cytophagales	Amoebophilaceae	uncultured	uncultured_bacterium	0	0	21	0	8	9	0	0	0	0	0	0	0	15	0	0	0	0	13	0	0	0	0	0	0	0	0	0	0	0	0	0	0	0	0	0	0	0	0	0	0
73ecbdc0ca96fd75e080b8bec1fa1c7b	ASV1854	Bacteria	Bacteroidota	Bacteroidia	Cytophagales	Amoebophilaceae	uncultured	uncultured_Flexibacteraceae	0	0	0	0	0	0	0	0	0	0	65	0	0	0	0	0	0	0	0	0	0	0	0	0	0	0	0	0	0	0	0	0	0	0	0	0	0	0	0	0	0
ce3d6e56e29a0f18406c5c6c81df4a79	ASV4352	Bacteria	Bacteroidota	Bacteroidia	Cytophagales	Cyclobacteriaceae	uncultured	uncultured_bacterium	0	0	0	0	0	0	34	31	0	0	0	0	0	0	0	0	0	0	0	0	0	0	0	0	0	0	0	0	0	0	0	0	0	0	0	0	0	0	0	0	0
236cb71b8b4aa0ace5df2d5ebcd50593	ASV2160	Bacteria	Bacteroidota	Bacteroidia	Cytophagales	Cyclobacteriaceae	uncultured	uncultured_Flexibacteraceae	0	0	0	17	0	0	0	0	0	0	0	0	0	0	0	0	0	15	15	0	0	0	0	0	0	0	0	0	0	0	0	0	0	0	0	0	0	0	15	0	0
ee108e7a574429e78dceadec950c8bfd	ASV5033	Bacteria	Bacteroidota	Bacteroidia	Cytophagales	Amoebophilaceae	uncultured	uncultured_bacterium	0	0	0	0	8	0	0	0	0	0	46	0	0	0	0	0	0	0	0	0	0	0	0	0	0	0	0	8	0	0	0	0	0	0	0	0	0	0	0	0	0
25631848deecc1139378fbb63ced3287	ASV3283	Bacteria	Bacteroidota	Bacteroidia	Cytophagales	Amoebophilaceae	uncultured	uncultured_bacterium	0	0	0	0	0	0	0	0	0	0	0	0	0	0	0	0	0	0	0	0	0	0	0	0	0	0	0	0	59	0	0	0	0	0	0	0	0	0	0	0	0
68dbcd82e539b99199e554498175f4dc	ASV1807	Bacteria	Bacteroidota	Bacteroidia	Cytophagales	Amoebophilaceae	uncultured	uncultured_bacterium	31	0	0	0	0	0	0	0	0	0	0	0	0	0	0	9	9	0	0	0	0	0	0	0	0	0	0	0	0	0	0	0	0	0	0	0	0	0	0	7	0
edec8c039ea04a01f5c3c8dca1c28926	ASV5022	Bacteria	Bacteroidota	Bacteroidia	Cytophagales	Cyclobacteriaceae	uncultured	uncultured_bacterium	0	0	0	0	0	0	0	0	0	0	0	0	0	0	0	0	0	0	0	0	0	0	0	18	0	0	0	0	0	0	37	0	0	0	0	0	0	0	0	0	0
7cb4601e797d99cb1800717c9e687594	ASV998	Bacteria	Bacteroidota	Bacteroidia	Cytophagales	Cyclobacteriaceae	uncultured	uncultured_Flexibacteraceae	0	4	0	0	0	0	0	0	6	0	14	0	0	0	5	13	0	0	0	0	0	0	0	0	0	0	0	0	0	0	0	0	0	0	0	0	12	0	0	0	0
cfb2d6c8b7a76fb7432ac35f62845231	ASV4392	Bacteria	Bacteroidota	Bacteroidia	Cytophagales	Amoebophilaceae	uncultured	NA	0	0	0	0	0	0	0	0	0	0	0	0	0	0	10	0	0	0	0	0	0	0	0	19	4	0	0	0	0	0	0	0	0	18	0	0	0	0	0	0	0
ea0fdf5ad1c6d16ebd526b25317c4eb7	ASV4940	Bacteria	Bacteroidota	Bacteroidia	Cytophagales	Amoebophilaceae	uncultured	uncultured_bacterium	0	0	0	21	0	0	0	0	0	0	0	0	0	0	0	31	0	0	0	0	0	0	0	0	0	0	0	0	0	0	0	0	0	0	0	0	0	0	0	0	0
1616b343cf5937b84a9b39fc46505133	ASV2578	Bacteria	Bacteroidota	Bacteroidia	Cytophagales	Cyclobacteriaceae	uncultured	uncultured_bacterium	0	0	0	0	0	0	0	0	51	0	0	0	0	0	0	0	0	0	0	0	0	0	0	0	0	0	0	0	0	0	0	0	0	0	0	0	0	0	0	0	0
132ea9ee1d43c19bbd8a8daed1da8c99	ASV2113	Bacteria	Bacteroidota	Bacteroidia	Cytophagales	Amoebophilaceae	uncultured	uncultured_bacterium	0	0	0	0	0	0	50	0	0	0	0	0	0	0	0	0	0	0	0	0	0	0	0	0	0	0	0	0	0	0	0	0	0	0	0	0	0	0	0	0	0
dc0498b8d4b00961c1e075c01c7e51fc	ASV4630	Bacteria	Bacteroidota	Bacteroidia	Cytophagales	Amoebophilaceae	uncultured	uncultured_bacterium	0	0	0	0	0	0	0	0	0	0	0	0	0	0	0	0	0	0	0	0	0	0	0	0	0	0	0	0	0	0	0	0	0	0	0	0	0	0	50	0	0
225544c7ab4652e457b0c2be59421593	ASV3081	Bacteria	Bacteroidota	Bacteroidia	Cytophagales	Cyclobacteriaceae	uncultured	uncultured_bacterium	0	0	0	0	0	0	0	0	0	0	0	0	0	0	0	0	0	0	0	0	0	0	0	0	0	0	0	0	8	0	0	12	0	11	0	0	0	0	18	0	0
351d94f3d2da4080d7cc462125797785	ASV2230	Bacteria	Bacteroidota	Bacteroidia	Cytophagales	Amoebophilaceae	uncultured	NA	0	0	0	0	0	0	0	0	0	0	0	0	0	0	0	0	0	0	42	0	0	0	0	0	0	0	0	0	0	0	0	0	0	0	0	0	0	0	0	0	0
f3b8d6b98c8831232a6f9c22bd24b8c4	ASV5100	Bacteria	Bacteroidota	Bacteroidia	Cytophagales	Amoebophilaceae	uncultured	uncultured_Flexibacteraceae	0	0	0	0	0	0	0	0	0	0	0	0	0	0	0	0	0	0	0	0	0	0	0	0	0	0	0	0	0	0	42	0	0	0	0	0	0	0	0	0	0
24dca71ce7c9a92bc6598783e1477784	ASV1468	Bacteria	Bacteroidota	Bacteroidia	Cytophagales	Cyclobacteriaceae	uncultured	uncultured_sediment	0	0	0	25	16	0	0	0	0	0	0	0	0	0	0	0	0	0	0	0	0	0	0	0	0	0	0	0	0	0	0	0	0	0	0	0	0	0	0	0	0
59844082440b63c21d1091fc3853733e	ASV3365	Bacteria	Bacteroidota	Bacteroidia	Cytophagales	Amoebophilaceae	uncultured	NA	0	0	0	0	36	0	0	0	0	0	0	0	0	0	0	0	0	0	0	0	0	0	0	0	0	0	0	0	0	0	0	0	0	0	0	0	0	0	0	0	0
6bee64336d93d49ed649707acc827827	ASV846	Bacteria	Bacteroidota	Bacteroidia	Cytophagales	Amoebophilaceae	uncultured	uncultured_Flexibacteraceae	0	0	0	19	0	0	0	0	0	0	0	0	0	0	0	0	0	0	0	0	0	0	0	0	0	0	0	0	0	17	0	0	0	0	0	0	0	0	0	0	0
743643c3b3e9423fc006e067f2c291ee	ASV3164	Bacteria	Bacteroidota	Bacteroidia	Cytophagales	Cyclobacteriaceae	uncultured	uncultured_bacterium	0	0	0	0	0	0	0	0	0	0	7	0	0	0	0	0	0	0	0	0	0	0	0	0	0	0	0	0	0	29	0	0	0	0	0	0	0	0	0	0	0
b34396d4ce8bd2c05c67ac773f49d8f8	ASV3868	Bacteria	Bacteroidota	Bacteroidia	Cytophagales	Amoebophilaceae	uncultured	uncultured_bacterium	0	0	0	0	0	0	0	0	0	0	0	0	0	0	0	0	0	0	0	0	0	0	0	0	0	34	0	0	0	0	0	0	0	0	0	0	0	0	0	0	0
396732dbe59131be5d0338d85ec87aa1	ASV3113	Bacteria	Bacteroidota	Bacteroidia	Cytophagales	Amoebophilaceae	uncultured	uncultured_bacterium	0	0	0	0	0	0	0	33	0	0	0	0	0	0	0	0	0	0	0	0	0	0	0	0	0	0	0	0	0	0	0	0	0	0	0	0	0	0	0	0	0
53832fe06feb3f1e251afd7ecc40a114	ASV2966	Bacteria	Bacteroidota	Bacteroidia	Cytophagales	Amoebophilaceae	uncultured	NA	0	0	0	0	0	0	0	0	0	0	0	0	0	0	0	0	0	0	0	0	0	0	0	0	0	0	0	0	0	0	0	0	0	32	0	0	0	0	0	0	0
4094b7b235df19711e469599bd2c3c4d	ASV2656	Bacteria	Bacteroidota	Bacteroidia	Cytophagales	Amoebophilaceae	uncultured	uncultured_bacterium	0	0	0	0	0	0	0	12	0	0	0	0	0	0	0	0	0	0	0	0	0	0	0	0	0	0	0	0	0	0	0	0	0	0	0	0	0	0	0	0	0
4427e9f60edc6e690631231c62080f0f	ASV2668	Bacteria	Bacteroidota	Bacteroidia	Cytophagales	Cyclobacteriaceae	uncultured	uncultured_bacterium	0	0	0	0	0	0	0	30	0	0	0	0	0	0	0	0	0	0	0	0	0	0	0	0	0	0	0	0	0	0	0	0	0	0	0	0	0	0	0	0	0
9667afb9bca83f60c374944bc79bdc63	ASV2849	Bacteria	Bacteroidota	Bacteroidia	Cytophagales	Amoebophilaceae	uncultured	uncultured_bacterium	0	0	0	0	0	0	0	0	0	0	0	0	0	0	0	0	0	0	0	0	0	0	0	0	0	0	0	0	0	0	0	0	0	0	0	0	0	0	0	0	0
99f6a42170c207f1c8eb977c41c07ea6	ASV2094	Bacteria	Bacteroidota	Bacteroidia	Cytophagales	Amoebophilaceae	uncultured	uncultured_bacterium	15	0	0	0	0	0	0	0	0	0	0	0	0	0	0	0	0	0	0	15	0	0	0	0	0	0	0	0	0	0	0	0	0	0	0	0	0	0	0	0	0
99350975489592283b367af1c3aae2f9	ASV3382	Bacteria	Bacteroidota	Bacteroidia	Cytophagales	Amoebophilaceae	uncultured	uncultured_bacterium	0	0	0	0	0	0	0	0	0	0	0	0	0	0	0	0	0	0	0	0	0	0	0	29	0	0	0	0	0	0	0	0	0	0	0	0	0	0	0	0	0
ca00e2fd48199252bace67c1cdbec721	ASV4264	Bacteria	Bacteroidota	Bacteroidia	Cytophagales	Amoebophilaceae	uncultured	NA	0	0	0	0	0	0	0	0	0	0	0	0	0	0	0	0	0	0	0	0	0	0	0	0	0	0	0	0	29	0	0	0	0	0	0	0	0	0	0	0	0
fc2247deb7147879743b82226fe7dd51	ASV5328	Bacteria	Bacteroidota	Bacteroidia	Cytophagales	Amoebophilaceae	uncultured	uncultured_bacterium	0	0	0	0	0	0	6	0	0	0	0	0	0	0	0	0	0	0	7	0	0	0	0	0	0	0	0	16	0	0	0	0	0	0	0	0	0	0	0	0	0
17f2ed7a905b90ee6cfb756b923bc77e	ASV1419	Bacteria	Bacteroidota	Bacteroidia	Cytophagales	Amoebophilaceae	uncultured	uncultured_bacterium	0	0	0	0	19	0	0	0	0	0	0	0	0	0	0	0	0	0	0	0	0	0	0	0	0	0	0	0	0	0	0	0	0	0	0	4	0	0	0	0	0
29544b3b42609ce6ebc4c87b55411be7	ASV2912	Bacteria	Bacteroidota	Bacteroidia	Cytophagales	Amoebophilaceae	uncultured	uncultured_Flexibacteraceae	0	0	0	0	0	0	0	20	0	0	0	0	0	0	0	0	0	0	0	0	0	0	0	0	0	0	0	0	0	0	0	0	0	0	0	0	0	0	8	0	0
479773a64ece736aff36ab5227a145a6	ASV3126	Bacteria	Bacteroidota	Bacteroidia	Cytophagales	Flammeovirgaceae	uncultured	uncultured_bacterium	0	0	0	0	0	0	0	0	0	0	0	0	0	0	0	8	2	0	0	0	0	0	0	0	0	0	0	0	0	0	0	0	0	0	6	0	11	0	0	0	0
4e0844f51b497216e3a7d4819a5a6ba0	ASV637	Bacteria	Bacteroidota	Bacteroidia	Cytophagales	Amoebophilaceae	uncultured	NA	0	0	0	0	10	0	0	0	0	0	0	0	0	0	0	0	0	0	17	0	0	0	0	0	0	0	0	0	0	0	0	0	0	0	0	0	0	0	0	0	0
89149a11974c190f57fda41a21e63479	ASV3031	Bacteria	Bacteroidota	Bacteroidia	Cytophagales	Cyclobacteriaceae	uncultured	NA	10	0	0	12	0	0	0	0	0	0	0	0	0	0	5	0	0	0	0	0	0	0	0	0	0	0	0	0	0	0	0	0	0	0	0	0	0	0	0	0	0
8a19dbb74a288849b1063221361eda04	ASV1074	Bacteria	Bacteroidota	Bacteroidia	Cytophagales	Amoebophilaceae	uncultured	uncultured_bacterium	13	0	0	0	0	0	0	0	0	0	0	0	0	0	0	0	0	0	0	14	0	0	0	0	0	0	0	0	0	0	0	0	0	0	0	0	0	0	0	0	0
cc1d381a93ea8cc261845275a8b16c71	ASV4307	Bacteria	Bacteroidota	Bacteroidia	Cytophagales	Amoebophilaceae	uncultured	uncultured_bacterium	0	0	0	0	0	0	0	0	0	0	0	0	0	0	0	0	0	26	0	0	0	0	0	0	0	0	0	0	0	0	0	0	0	0	0	0	0	0	0	0	0
ae33fe22de7accdaae8609352948d1d6	ASV3663	Bacteria	Bacteroidota	Bacteroidia	Cytophagales	Amoebophilaceae	uncultured	uncultured_bacterium	0	0	0	0	0	25	0	0	0	0	0	0	0	0	0	0	0	0	0	0	0	0	0	0	0	0	0	0	0	0	0	0	0	0	0	0	0	0	0	0	0
00ea54c9a9be9c7e1f162eb7de20ba7e	ASV101	Bacteria	Bacteroidota	Bacteroidia	Cytophagales	Cyclobacteriaceae	uncultured	uncultured_Bacteroidetes	0	0	0	0	0	0	0	24	0	0	0	0	0	0	0	0	0	0	0	0	0	0	0	0	0	0	0	0	0	0	0	0	0	0	0	0	0	0	0	0	0
4027c59f553a5fdcd36c7910718ea983	ASV2654	Bacteria	Bacteroidota	Bacteroidia	Cytophagales	Amoebophilaceae	uncultured	NA	0	0	0	0	0	0	0	0	0	0	23	0	0	0	0	0	0	0	0	0	0	0	0	0	0	0	0	0	0	0	0	0	0	0	0	0	0	0	0	0	0
1e6a4713bb1975eebeb487d2ddaca077	ASV229	Bacteria	Bacteroidota	Bacteroidia	Cytophagales	Amoebophilaceae	uncultured	NA	0	0	0	0	0	0	0	0	0	0	0	0	0	0	0	0	0	0	0	0	0	0	0	0	0	21	0	0	0	0	0	0	0	0	0	0	0	0	0	0	0
a1f8ead66cdc009a1714e2460530d247	ASV3403	Bacteria	Bacteroidota	Bacteroidia	Cytophagales	Amoebophilaceae	uncultured	uncultured_bacterium	0	0	0	0	0	0	0	0	0	0	0	0	0	0	0	0	0	0	21	0	0	0	0	0	0	0	0	0	0	0	0	0	0	0	0	0	0	0	0	0	0
c27bcddb388d795992d74a325d03029d	ASV4126	Bacteria	Bacteroidota	Bacteroidia	Cytophagales	Amoebophilaceae	uncultured	uncultured_bacterium	0	0	0	0	0	0	0	0	0	0	0	0	0	0	0	0	0	0	0	0	0	0	0	0	0	0	0	21	0	0	0	0	0	0	0	0	0	0	0	0	0
f15d9d622292bde70fad0edc5f17d3c1	ASV5164	Bacteria	Dadabacteria	Dadabacteriia	Dadabacteriales	Dadabacteriales	Dadabacteriales	uncultured_bacterium	12	14	0	0	33	0	22	49	18	0	0	0	13	0	0	13	0	12	0	15	7	0	7	19	0	35	17	0	17	18	15	12	20	21	0	0	0	7	23	11	15
b13c0429aef754610c1508caa96936ee	ASV3776	Bacteria	Dadabacteria	Dadabacteriia	Dadabacteriales	Dadabacteriales	Dadabacteriales	NA	0	21	27	25	0	0	0	14	0	6	0	25	0	0	0	13	19	22	13	0	0	0	0	20	31	0	0	4	0	0	0	10	0	0	0	0	14	19	0	0	0
fff8457db0e2944ee1e5bda865f3d40b	ASV5385	Bacteria	Dadabacteria	Dadabacteriia	Dadabacteriales	Dadabacteriales	Dadabacteriales	NA	26	0	0	0	0	0	0	0	0	0	0	0	0	0	0	0	0	0	0	21	0	0	0	0	0	0	0	0	0	0	0	0	0	8	0	0	0	0	0	0	0
dd87087cffbbca0728fc4d37893f811d	ASV4650	Bacteria	Dadabacteria	Dadabacteriia	Dadabacteriales	Dadabacteriales	Dadabacteriales	uncultured_bacterium	0	0	0	0	0	0	0	0	0	0	0	0	0	6	0	0	0	7	0	0	0	0	0	9	12	0	0	0	0	0	0	0	0	0	0	0	0	0	0	0	7
0db43d2f7bbc564c77fcc80c588656a9	ASV74	Bacteria	Dadabacteria	Dadabacteriia	Dadabacteriales	Dadabacteriales	Dadabacteriales	uncultured_organism	0	0	0	0	8	0	0	0	0	0	0	0	0	0	0	0	0	0	0	0	0	0	0	0	0	0	0	0	0	0	0	0	0	0	0	0	0	0	0	0	16
d58674c5f8d20b57924fcc5baeb0a2ca	ASV4553	Bacteria	Dadabacteria	Dadabacteriia	Dadabacteriales	Dadabacteriales	Dadabacteriales	NA	0	0	0	0	0	0	0	0	11	0	0	0	12	0	0	0	0	0	0	0	0	0	0	0	0	0	0	0	0	0	0	0	0	0	0	0	0	0	0	0	0
7fec8c17091e40d05b8a187715ce73a3	ASV1064	Bacteria	Dadabacteria	Dadabacteriia	Dadabacteriales	Dadabacteriales	Dadabacteriales	uncultured_bacterium	0	0	12	0	0	0	0	0	0	0	0	0	0	0	0	0	0	0	0	0	9	0	0	0	0	0	0	0	0	0	0	0	0	0	0	0	0	0	0	0	0
459983755c42d87c3f27416a2abeab8e	ASV3329	Bacteria	Dadabacteria	Dadabacteriia	Dadabacteriales	Dadabacteriales	Dadabacteriales	uncultured_bacterium	0	0	0	0	0	0	0	0	0	0	0	0	0	0	0	0	0	0	0	0	0	0	0	0	0	0	0	20	0	0	0	0	0	0	0	0	0	0	0	0	0
b98e255fa3d48c63b990e478b05534c5	ASV3822	Bacteria	Deferribacterota	Deferribacteres	Deferribacterales	Deferribacteraceae	Denitrovibrio	bioreactor_metagenome	0	0	0	0	37	0	0	0	0	0	0	7	0	35	0	0	0	0	77	0	0	0	0	0	0	0	0	0	0	0	0	0	0	0	0	0	0	0	0	0	0
2815bf5eb08f87d73e6eb5c63a5c4dc3	ASV2621	Bacteria	Deferribacterota	Deferribacteres	Deferribacterales	Deferribacteraceae	NA	NA	0	0	0	0	0	0	0	0	0	0	0	0	28	22	0	0	0	0	0	0	0	0	0	0	0	0	0	0	0	0	0	0	0	0	0	0	0	0	0	0	0
1486175b8b59c3e8087e260834a102b1	ASV3202	Bacteria	Deferribacterota	Deferribacteres	Deferribacterales	Deferribacteraceae	uncultured	uncultured_bacterium	0	0	0	0	0	0	0	0	0	0	0	0	0	0	0	0	0	0	0	0	0	0	0	0	0	0	0	0	0	0	27	0	0	0	0	0	0	0	0	0	0
34360376eefbc172da9ba80dd6ac4b8a	ASV3290	Bacteria	Deferribacterota	Deferribacteres	Deferribacterales	Deferribacteraceae	uncultured	uncultured_bacterium	0	0	0	0	0	0	0	0	0	0	0	0	0	0	0	0	0	0	0	0	0	0	0	0	0	0	0	0	0	0	19	4	0	0	0	0	0	0	0	0	0
a441fa52a07ce1ecdcbe88778e397540	ASV3520	Bacteria	Proteobacteria	Alphaproteobacteria	Defluviicoccales	Defluviicoccaceae	Defluviicoccus	NA	0	0	0	0	0	0	9	0	0	0	0	0	0	0	0	0	0	0	0	0	0	0	0	0	0	6	0	0	8	0	0	0	0	0	0	0	0	0	0	0	0
4e40e81c545dc28491151e29d9d57668	ASV631	Bacteria	Proteobacteria	Alphaproteobacteria	Defluviicoccales	Defluviicoccaceae	Defluviicoccus	uncultured_Alphaproteobacteria	0	0	0	0	0	0	6	0	6	0	0	0	0	0	0	0	0	0	0	0	0	0	0	0	0	0	0	0	9	0	0	0	0	0	0	0	0	0	0	0	0
03c56509b8a828b2713a06dc668d3d42	ASV463	Bacteria	Proteobacteria	Alphaproteobacteria	Defluviicoccales	NA	NA	NA	0	0	0	0	107	0	0	0	0	0	0	0	0	0	0	0	0	0	0	0	0	5	0	0	0	0	0	0	16	8	133	36	0	0	0	0	0	0	0	0	0
a1848e0b8aefd07a3d16fa4bfd492969	ASV3537	Bacteria	Proteobacteria	Alphaproteobacteria	Defluviicoccales	uncultured	uncultured	uncultured_bacterium	153	119	101	78	64	70	165	222	160	39	60	54	39	65	54	57	54	170	102	64	37	90	134	54	43	203	55	116	91	50	69	110	159	143	35	45	131	108	155	52	55
0421898b25d85c69f2ce92c8e7c09451	ASV3119	Bacteria	Proteobacteria	Alphaproteobacteria	Defluviicoccales	uncultured	uncultured	NA	180	173	161	120	108	136	0	16	0	0	0	75	40	87	81	105	176	208	56	140	124	133	148	167	125	5	0	0	0	0	123	0	10	6	95	130	196	187	12	144	162
9f2c87b94b17e22f86147de123bb7532	ASV1335	Bacteria	Proteobacteria	Alphaproteobacteria	Defluviicoccales	uncultured	uncultured	NA	20	39	52	41	33	38	102	107	70	37	31	35	28	38	12	30	28	27	32	31	15	25	13	66	0	135	36	68	113	98	21	47	93	68	23	27	60	23	86	30	20
e9461ff87224809645bce75762b3cad3	ASV4916	Bacteria	Proteobacteria	Alphaproteobacteria	Defluviicoccales	uncultured	uncultured	NA	142	99	35	43	26	32	28	34	38	23	32	38	10	36	22	26	16	49	29	44	38	35	39	78	56	44	34	22	17	41	24	38	0	50	29	22	60	33	45	23	60
2a34a7b42563017462383016b8623d3f	ASV281	Bacteria	Proteobacteria	Alphaproteobacteria	Defluviicoccales	uncultured	uncultured	uncultured_Alphaproteobacteria	0	43	0	55	25	40	33	36	0	9	28	25	28	26	37	56	32	77	37	0	0	0	69	37	52	13	0	23	9	20	57	33	21	48	15	39	64	44	37	39	56
e61c192e60648399786e72710f13a186	ASV4854	Bacteria	Proteobacteria	Alphaproteobacteria	Defluviicoccales	uncultured	uncultured	NA	0	0	0	0	0	0	69	75	85	26	75	0	0	0	0	0	0	0	64	0	0	0	0	0	0	95	88	57	51	56	0	77	66	76	0	0	0	0	92	0	0
9c1dfa5a47c0943b4d69ff96e3ab6d36	ASV1257	Bacteria	Proteobacteria	Alphaproteobacteria	Defluviicoccales	uncultured	uncultured	uncultured_marine	19	33	20	29	36	25	0	25	19	0	7	17	0	13	0	8	12	21	29	15	13	32	54	10	0	16	20	15	0	0	23	0	0	12	6	0	21	0	13	9	15
ab29e02f6d7fa66c4ff910d7039d1170	ASV3600	Bacteria	Proteobacteria	Alphaproteobacteria	Defluviicoccales	uncultured	uncultured	uncultured_bacterium	16	20	34	18	26	17	10	37	17	0	5	12	13	21	9	22	14	12	0	25	18	20	22	16	12	16	4	0	0	0	14	0	12	11	8	11	18	21	14	0	17
06f99c8266cbd7c3198825910f9c143b	ASV923	Bacteria	Proteobacteria	Alphaproteobacteria	Defluviicoccales	uncultured	uncultured	NA	0	8	0	0	0	0	28	36	31	7	25	0	0	0	0	0	0	6	9	0	0	0	0	0	0	49	42	47	40	41	0	14	35	31	0	0	0	0	30	0	0
8e242560841953ccf9d25c17b7f17d5e	ASV1174	Bacteria	Proteobacteria	Alphaproteobacteria	Defluviicoccales	uncultured	uncultured	uncultured_Alphaproteobacteria	81	0	27	0	0	0	0	0	18	0	0	0	0	0	0	0	0	0	0	57	44	32	0	0	0	0	34	0	0	0	0	0	0	0	0	0	0	0	0	0	0
97204a226eea52bf597cc09ef90e9cde	ASV3052	Bacteria	Proteobacteria	Alphaproteobacteria	Defluviicoccales	uncultured	uncultured	NA	18	5	0	10	12	9	44	0	0	0	0	0	0	0	0	8	0	0	0	0	0	0	13	0	0	0	0	49	0	0	10	0	0	36	0	0	0	4	0	0	0
f1804f2c5577f1be00c220ec8afcdfc7	ASV5235	Bacteria	Proteobacteria	Alphaproteobacteria	Defluviicoccales	uncultured	uncultured	uncultured_organism	0	5	0	14	14	0	0	9	12	0	0	16	0	11	0	0	0	0	49	0	0	0	13	0	0	14	0	7	0	0	8	0	0	0	0	0	0	0	24	0	0
ed564587b98cd01a6b0b9d4710c65b5c	ASV5010	Bacteria	Proteobacteria	Alphaproteobacteria	Defluviicoccales	uncultured	uncultured	uncultured_deep-sea	0	0	0	0	0	10	0	0	0	0	0	3	0	0	5	16	0	31	0	8	4	0	0	7	7	0	0	0	0	0	0	0	0	0	0	8	35	7	0	0	0
65a074e19ffbcd4df92ae930d21fa7fa	ASV1778	Bacteria	Proteobacteria	Alphaproteobacteria	Defluviicoccales	uncultured	uncultured	NA	0	0	0	0	0	0	0	0	0	0	0	0	0	101	0	0	0	0	0	0	0	0	0	0	0	0	0	0	0	0	0	0	0	0	0	0	0	0	0	0	0
5084e5b7e7f9809b4d9cc5a4ab1fa5b0	ASV2687	Bacteria	Proteobacteria	Alphaproteobacteria	Defluviicoccales	uncultured	uncultured	NA	0	0	0	3	0	0	0	0	0	0	8	0	0	0	0	0	0	0	0	3	0	0	0	0	8	0	0	0	0	0	0	6	0	0	0	4	5	0	7	0	9
add45c28a11de63a5cd61149ae914888	ASV3654	Bacteria	Proteobacteria	Alphaproteobacteria	Defluviicoccales	uncultured	uncultured	NA	0	0	0	0	0	0	8	0	11	0	0	0	0	0	0	0	0	8	0	0	0	0	0	0	0	0	0	8	0	3	0	5	0	0	0	0	0	0	0	0	0
9ed2a9c8c40c7595f88603656e224ac6	ASV1328	Bacteria	Deinococcota	Deinococci	Deinococcales	Trueperaceae	Truepera	uncultured_bacterium	21	20	32	20	12	21	0	0	0	0	0	3	5	16	19	7	10	15	0	23	5	23	21	22	34	3	0	0	8	0	26	3	0	0	0	10	39	41	5	7	16
317328907d73a02cdf24b406ce47a52e	ASV3323	Bacteria	Deinococcota	Deinococci	Deinococcales	Trueperaceae	Truepera	uncultured_bacterium	0	4	4	4	0	6	0	5	0	0	0	0	0	0	0	9	0	0	0	8	7	0	4	0	9	8	0	0	0	0	8	5	0	0	0	0	4	0	0	0	0
8d6b5a628ac8f5656de1b80e9b2d41bb	ASV1137	Bacteria	Desulfobacterota	Desulfobacteria	Desulfobacterales	Desulfobacterales	Desulfatiferula	uncultured_bacterium	0	0	0	0	0	0	0	0	0	0	0	0	0	0	0	0	0	0	0	0	0	0	0	0	0	14	0	0	0	0	0	0	10	0	0	0	0	0	0	0	0
a3ff361584e5f2c83171c8dc56eb0fb8	ASV3414	Bacteria	Desulfobacterota	Desulfobacteria	Desulfobacterales	Desulfobacteraceae	Desulfobacter	uncultured_bacterium	0	0	0	0	0	0	170	334	171	94	36	53	8	0	0	0	0	0	14	0	0	0	0	0	0	626	26	120	136	92	77	235	430	37	30	0	0	0	57	0	0
ac40647578574ec485ee39403a79f535	ASV3629	Bacteria	Desulfobacterota	Desulfobacteria	Desulfobacterales	Desulfobacteraceae	Desulfobacter	uncultured_bacterium	0	0	36	0	67	123	0	57	34	0	0	38	0	0	33	0	0	0	19	0	0	16	44	0	0	132	0	0	0	39	36	55	173	0	0	0	0	0	0	0	0
e9aa20ca75cf2d9a9d78668e57babfa8	ASV4813	Bacteria	Desulfobacterota	Desulfobacteria	Desulfobacterales	Desulfobacteraceae	Desulfobacter	uncultured_bacterium	0	0	0	0	0	0	74	46	70	33	0	0	0	0	0	0	0	0	0	0	0	0	0	0	0	150	0	67	70	0	0	92	203	0	0	0	0	0	35	0	0
8b7ad9a56fae63345a9b6b9a34e29021	ASV1095	Bacteria	Desulfobacterota	Desulfobacteria	Desulfobacterales	Desulfobacteraceae	Desulfobacter	uncultured_bacterium	0	0	42	11	100	139	0	0	0	0	0	32	0	16	59	0	0	12	0	0	0	24	39	6	0	0	0	0	0	0	83	0	0	0	24	0	0	15	0	0	7
4bd805746462ce5fca018d08a1cdeeb4	ASV575	Bacteria	Desulfobacterota	Desulfobacteria	Desulfobacterales	Desulfobacteraceae	Desulfobacter	delta_proteobacterium	0	0	0	0	0	0	36	27	33	0	0	0	0	0	0	0	0	0	0	0	0	0	0	0	0	33	18	0	35	23	0	0	95	0	0	0	0	0	17	0	0
8212425937285037d74b69b776bd1753	ASV3380	Bacteria	Desulfobacterota	Desulfobacteria	Desulfobacterales	Desulfobacteraceae	Desulfobacter	NA	0	0	0	0	0	0	0	0	0	24	0	0	0	0	0	0	0	0	0	0	0	0	0	0	0	52	0	0	0	0	0	0	0	0	0	0	0	0	0	0	0
ef897498830479689767c566e9d3401a	ASV5066	Bacteria	Desulfobacterota	Desulfobacteria	Desulfobacterales	Desulfobacteraceae	Desulfobacter	NA	0	0	0	0	0	0	0	0	0	0	0	0	0	0	0	0	0	0	39	0	0	0	0	0	0	0	0	0	0	0	0	0	0	0	0	0	0	0	0	0	0
91e18654cacb6dd9ed678451fb47d0df	ASV2018	Bacteria	Desulfobacterota	Desulfobacteria	Desulfobacterales	Desulfobacteraceae	Desulfoconvexum	uncultured_bacterium	18	12	79	43	471	370	0	0	0	0	0	176	16	372	14	10	59	0	389	19	9	296	256	13	0	0	0	0	0	0	675	0	0	0	210	0	0	9	0	0	0
5032e7c9daef45a9314edad68981fbd5	ASV2685	Bacteria	Desulfobacterota	Desulfobacteria	Desulfobacterales	Desulfobacteraceae	Desulfoconvexum	NA	0	0	0	0	0	0	28	41	47	0	0	0	0	0	0	0	0	0	0	0	0	0	0	0	0	147	0	0	21	0	0	26	185	0	0	0	0	0	0	0	0
444977efdb099adf88490a50781c8fa3	ASV3123	Bacteria	Desulfobacterota	Desulfobacteria	Desulfobacterales	Desulfobacteraceae	Desulfoconvexum	NA	0	0	0	0	0	0	0	0	0	0	0	0	0	0	0	0	0	0	0	0	0	0	0	0	0	0	0	0	92	53	0	0	193	0	0	0	0	0	0	0	0
04f13f85b6e2368d4de0af0ff02fcc7e	ASV660	Bacteria	Desulfobacterota	Desulfobacteria	Desulfobacterales	Desulfolunaceae	Desulfofaba	uncultured_bacterium	58	107	377	0	239	467	42	134	25	33	0	284	250	264	123	9	21	73	417	234	47	596	237	67	6	120	118	32	24	44	315	64	57	0	111	0	0	90	66	0	0
5b8eca9b64222646dbebf8459b8b7bfd	ASV691	Bacteria	Desulfobacterota	Desulfobacteria	Desulfobacterales	Desulfolunaceae	Desulfofaba	uncultured_bacterium	0	0	0	0	0	0	0	137	33	64	0	0	0	174	0	0	0	0	0	0	0	0	245	0	0	87	0	0	38	76	0	82	100	39	0	0	0	0	44	0	0
3e6f15ccb3cd810320da1123cec2cba5	ASV499	Bacteria	Desulfobacterota	Desulfobacteria	Desulfobacterales	Desulfolunaceae	Desulfofaba	NA	0	0	0	0	0	0	30	48	37	41	19	0	0	0	0	0	0	0	0	0	0	0	0	0	0	55	0	42	26	0	315	41	54	0	0	0	0	0	0	22	0
7fdbb931bc92c06b58f718b204aaebb9	ASV1061	Bacteria	Desulfobacterota	Desulfobacteria	Desulfobacterales	Desulfolunaceae	Desulfofaba	NA	0	0	0	0	0	0	0	0	0	0	0	0	17	222	0	0	0	0	0	0	0	0	222	0	0	0	0	0	0	0	0	0	0	0	0	0	0	0	0	0	0
70dc68658550950dfadaccbb14f3b47b	ASV1825	Bacteria	Desulfobacterota	Desulfobacteria	Desulfobacterales	Desulfolunaceae	Desulfofaba	uncultured_bacterium	0	0	0	18	0	0	19	59	0	16	0	0	0	0	0	0	0	0	0	0	0	0	0	0	0	72	0	0	0	0	0	0	55	0	0	0	0	0	0	0	0
12a804195f302b097272854cddff44ab	ASV1372	Bacteria	Desulfobacterota	Desulfobacteria	Desulfobacterales	Desulfolunaceae	Desulfofaba	uncultured_bacterium	0	0	0	0	0	0	0	0	0	0	0	0	0	0	0	0	0	0	0	0	0	0	0	0	0	0	52	0	0	0	0	0	0	0	0	0	0	0	0	0	0
016db0b769e0a8cafa16f9bed06738d6	ASV1414	Bacteria	Desulfobacterota	Desulfobacteria	Desulfobacterales	Desulfobacteraceae	Desulfotignum	NA	0	0	0	0	32	0	0	0	0	0	0	0	220	13	0	0	0	0	0	0	0	0	0	0	0	0	0	0	0	16	0	0	24	0	0	0	0	0	0	0	0
65a6b647ad7020bbac00b2bd1d6988a5	ASV1777	Bacteria	Desulfobacterota	Desulfobacteria	Desulfobacterales	Desulfobacteraceae	NA	NA	0	0	0	0	0	0	0	0	0	0	0	0	24	0	0	0	0	0	11	0	0	0	0	0	0	72	0	0	41	0	0	0	34	0	0	0	0	0	0	0	0
68fe0e2654eb9fa04e291a1b2f01d27e	ASV1808	Bacteria	Desulfobacterota	Desulfobacteria	Desulfobacterales	Desulfobacteraceae	NA	NA	0	0	0	0	0	0	39	0	40	0	0	0	0	0	0	0	0	0	0	0	0	0	0	0	0	20	0	0	27	0	0	24	0	0	0	0	0	0	0	0	0
fce554c468accd4e1721e870c961afe7	ASV5337	Bacteria	Desulfobacterota	Desulfobacteria	Desulfobacterales	Desulfobacteraceae	NA	NA	0	0	0	0	0	0	0	0	44	0	0	0	0	0	0	0	0	0	0	0	0	0	0	0	0	47	0	0	0	0	0	0	37	0	0	0	0	0	0	0	0
6e0cf712eadf9f8f2e8ff9987140df50	ASV891	Bacteria	Desulfobacterota	Desulfobacteria	Desulfobacterales	Desulfobacteraceae	NA	NA	0	0	0	0	0	0	0	0	0	0	0	0	0	0	0	0	0	0	0	0	0	0	0	0	0	50	0	48	0	0	0	0	0	0	0	0	0	0	28	0	0
fa813e9b621762de9630162db28b68a1	ASV5286	Bacteria	Desulfobacterota	Desulfobacteria	Desulfobacterales	Desulfobacteraceae	NA	NA	0	0	0	0	0	0	0	0	0	0	0	0	0	0	0	0	0	0	0	0	0	0	0	0	0	0	0	0	0	0	46	0	0	0	0	0	0	0	0	0	0
a8d417aeb54ab5518077c017dfa3dd83	ASV3453	Bacteria	Desulfobacterota	Desulfobacteria	Desulfobacterales	Desulfobacteraceae	NA	NA	0	0	0	0	0	0	0	0	0	0	0	0	0	0	0	0	0	0	21	0	0	0	0	0	0	0	0	0	0	0	0	0	0	0	0	0	0	0	0	0	0
7351f86787b9f733507501db69c65292	ASV2764	Bacteria	Desulfobacterota	Desulfobacteria	Desulfobacterales	Desulfosarcinaceae	Sva0081_sediment_group	NA	0	0	0	11	0	0	0	0	0	0	0	0	0	0	0	0	0	0	0	0	0	0	0	0	0	0	0	0	0	0	0	0	0	0	0	0	25	0	0	0	0
5cbf95f707b9d1e0f3acd9d8b5a57704	ASV736	Bacteria	Desulfobacterota	Desulfobacteria	Desulfobacterales	Desulfosarcinaceae	Sva0081_sediment_group	NA	0	0	0	0	0	0	0	0	0	0	0	0	0	0	0	0	0	0	0	0	0	0	20	0	0	0	0	0	0	0	0	0	0	0	0	0	0	0	0	0	0
2ffbd0ca89c725d7326e1b7b4eb53b8c	ASV402	Bacteria	Desulfobacterota	Desulfobacteria	Desulfobacterales	Desulfolunaceae	uncultured	uncultured_bacterium	0	0	0	0	0	0	0	0	0	101	0	0	0	0	0	0	0	0	0	0	0	0	0	0	0	0	8	0	0	0	0	0	0	0	0	0	0	0	0	0	0
07fab3dc7c9aedd3f07ae0faa0ac32e0	ASV1052	Bacteria	Desulfobacterota	Desulfobacteria	Desulfobacterales	Desulfolunaceae	uncultured	uncultured_bacterium	0	0	0	0	0	0	0	0	13	36	12	0	0	0	0	0	0	0	0	0	0	0	0	0	0	0	24	0	0	0	0	0	0	0	0	0	0	0	0	0	0
0776756a15613ee5620124cf0792d0e9	ASV3170	Bacteria	Desulfobacterota	Desulfobacteria	Desulfobacterales	uncultured	uncultured	uncultured_Desulfobacteraceae	0	0	0	0	0	0	0	0	0	0	0	0	0	0	0	0	0	0	0	0	0	0	0	0	0	21	0	0	0	0	0	0	47	0	0	0	0	0	0	0	0
a60c5747228e80bbae09661bdb8d8bbd	ASV3484	Bacteria	Desulfobacterota	Desulfobacteria	Desulfobacterales	Desulfosarcinaceae	uncultured	uncultured_delta	0	0	0	0	0	0	0	0	0	0	0	0	8	0	0	0	0	9	0	0	0	0	0	0	0	0	0	0	0	0	0	0	0	0	3	0	0	0	0	0	0
809e5e66c68e77eede77c70d416d86a3	ASV2469	Bacteria	Desulfobacterota	Desulfobulbia	Desulfobulbales	Desulfobulbaceae	Desulfobulbus	uncultured_delta	0	0	93	3	35	12	82	50	38	38	0	127	54	30	0	0	7	0	22	0	4	0	12	33	0	244	0	196	231	0	74	0	184	0	0	0	0	16	0	0	0
1bf4b6b63df2084bf1fbaa880907e6bc	ASV171	Bacteria	Desulfobacterota	Desulfobulbia	Desulfobulbales	Desulfobulbaceae	Desulfobulbus	NA	0	0	0	0	0	0	0	0	0	0	10	0	0	0	0	0	0	0	0	0	0	0	0	0	0	124	0	0	124	0	0	20	0	0	0	0	0	0	126	0	0
e308d5cf2cd3fb95458513df7f1c6ea0	ASV4878	Bacteria	Desulfobacterota	Desulfobulbia	Desulfobulbales	Desulfobulbaceae	Desulfobulbus	uncultured_Desulfobacterales	0	0	0	0	0	0	0	0	0	0	0	0	0	0	0	0	0	0	0	0	0	0	0	0	0	32	0	0	0	0	0	0	0	0	0	0	0	0	0	0	0
ada658253bc034f98aa87dfd6a764ae9	ASV3652	Bacteria	Desulfobacterota	Desulfobulbia	Desulfobulbales	Desulfocapsaceae	Desulfopila	uncultured_bacterium	0	0	0	0	0	153	212	407	277	149	36	243	56	29	14	0	0	0	17	0	0	0	322	0	0	798	28	415	615	272	45	147	444	83	0	0	0	0	261	22	0
02f4c2353429f709ad3befb7524f7ee4	ASV386	Bacteria	Desulfobacterota	Desulfobulbia	Desulfobulbales	Desulfocapsaceae	Desulfopila	uncultured_bacterium	0	0	0	0	0	0	0	0	0	26	0	0	0	0	0	0	0	0	0	0	0	0	0	0	0	152	0	22	0	138	0	0	126	9	0	0	0	0	0	0	0
f34b96501b4db94af054032c4c92a1be	ASV5176	Bacteria	Desulfobacterota	Desulfobulbia	Desulfobulbales	Desulfocapsaceae	Desulfopila	uncultured_bacterium	0	0	0	0	0	0	0	0	0	0	0	0	0	0	0	0	0	0	0	0	0	0	0	0	0	86	0	0	0	114	0	0	47	0	0	0	0	0	0	0	0
87381e9cd6b522e43c3181fee6a019e9	ASV3026	Bacteria	Desulfobacterota	Desulfobulbia	Desulfobulbales	Desulfocapsaceae	Desulfopila	uncultured_bacterium	0	0	0	0	0	0	0	0	0	32	0	0	0	0	0	0	0	0	0	0	0	0	0	0	0	0	0	0	52	0	0	0	0	0	0	0	0	0	0	0	0
a17d727cbfa726aee2001599fc0bbc6b	ASV3470	Bacteria	Desulfobacterota	Desulfobulbia	Desulfobulbales	Desulfocapsaceae	Desulfopila	NA	0	0	0	0	0	0	0	0	0	0	0	0	0	0	0	0	0	0	0	0	0	0	0	0	0	0	0	0	0	0	0	0	0	0	0	0	0	0	29	0	0
96de5708008df9e799adb233d8d0872f	ASV2054	Bacteria	Desulfobacterota	Desulfobulbia	Desulfobulbales	Desulfocapsaceae	Desulfopila	uncultured_delta	0	0	0	0	0	0	0	0	0	0	0	0	0	0	0	0	0	0	0	0	0	0	0	0	0	11	0	0	12	0	0	0	0	0	0	0	0	0	0	0	0
957b02c0fffe791d039a59159693d21f	ASV2541	Bacteria	Desulfobacterota	Desulfobulbia	Desulfobulbales	Desulfocapsaceae	Desulforhopalus	uncultured_bacterium	0	0	0	0	0	0	0	0	0	0	0	0	0	0	0	0	0	0	0	0	0	0	0	0	0	148	0	86	38	0	0	0	72	0	0	0	0	0	0	0	0
8f00c9366f986502f42b6fb3335b39de	ASV1188	Bacteria	Desulfobacterota	Desulfobulbia	Desulfobulbales	Desulfocapsaceae	Desulforhopalus	uncultured_delta	0	0	0	0	0	0	0	0	0	0	0	0	0	0	0	0	0	0	0	0	0	0	0	0	0	0	0	0	0	0	0	0	0	14	0	0	0	0	18	0	0
8c97fef569029a1bc6e026f4586d20ad	ASV1125	Bacteria	Desulfobacterota	Desulfobulbia	Desulfobulbales	Desulfocapsaceae	Desulforhopalus	uncultured_delta	0	0	0	0	0	0	0	0	0	0	0	0	0	0	0	0	0	0	0	0	0	0	0	0	0	0	0	0	0	0	0	0	0	25	0	0	0	0	0	0	0
d2591dbfbaa8a7e6d08babafbb428664	ASV4533	Bacteria	Desulfobacterota	Desulfobulbia	Desulfobulbales	Desulfocapsaceae	NA	NA	34	58	2916	168	5240	5530	383	652	264	125	48	5155	2321	4580	1300	9	86	16	1142	19	134	1348	2844	7	0	1014	21	827	423	237	3165	265	1537	40	55	23	0	1682	163	199	40
27829f44b694567854ea42ef548fea4c	ASV2907	Bacteria	Desulfobacterota	Desulfobulbia	Desulfobulbales	Desulfocapsaceae	NA	NA	0	0	0	0	0	0	24	31	22	16	0	0	16	0	0	0	0	0	0	0	0	0	0	0	0	36	0	13	52	0	0	28	45	0	0	0	0	0	25	0	0
7dc3377c740cdfb241040ebc83f56e61	ASV1017	Bacteria	Desulfobacterota	Desulfobulbia	Desulfobulbales	Desulfocapsaceae	NA	NA	0	0	0	0	0	0	0	0	0	0	0	0	0	0	0	0	0	0	0	0	0	0	0	0	0	48	0	46	44	0	0	0	65	0	0	0	0	0	0	0	0
616fff0e133abf0a963e556734a327de	ASV2366	Bacteria	Desulfobacterota	Desulfobulbia	Desulfobulbales	Desulfocapsaceae	NA	NA	0	0	0	0	0	0	21	0	0	0	0	0	0	0	0	0	0	0	0	0	0	0	0	0	0	30	0	0	62	0	0	0	26	0	0	0	0	0	0	0	0
0ba16f24694ec351f16b9a4e2faa2d76	ASV38	Bacteria	Desulfobacterota	Desulfobulbia	Desulfobulbales	Desulfocapsaceae	NA	NA	0	0	0	0	0	0	0	0	0	0	0	0	0	0	0	0	0	0	0	0	0	0	0	0	0	42	0	0	0	0	0	0	28	0	0	0	0	0	6	0	0
5da72496c700c43c22257b944024fe83	ASV753	Bacteria	Desulfobacterota	Desulfobulbia	Desulfobulbales	Desulfocapsaceae	NA	NA	0	0	0	0	0	0	0	0	0	10	0	0	0	0	0	0	0	0	0	0	0	0	0	0	0	0	0	0	39	16	0	0	0	0	0	0	0	0	0	0	0
b7e8c6218832b180f57b8afe503cca76	ASV3750	Bacteria	Desulfobacterota	Desulfobulbia	Desulfobulbales	Desulfocapsaceae	NA	NA	0	0	0	0	0	0	0	0	0	0	0	0	0	0	0	0	0	0	0	0	0	0	0	0	0	0	0	27	0	0	0	38	0	0	0	0	0	0	0	0	0
d6c306ee475dcdb46ac303da33d11d35	ASV4455	Bacteria	Desulfobacterota	Desulfobulbia	Desulfobulbales	Desulfocapsaceae	NA	NA	0	0	0	0	0	0	0	0	0	0	0	0	0	0	0	0	0	0	0	0	0	0	0	0	0	18	0	0	42	0	0	0	0	0	0	0	0	0	0	0	0
571afbbf5939f372161cbbf02a018840	ASV2344	Bacteria	Desulfobacterota	Desulfobulbia	Desulfobulbales	Desulfobulbaceae	NA	NA	0	0	0	0	0	0	0	0	0	0	0	0	0	0	0	0	0	0	0	0	0	0	0	0	0	0	0	0	35	0	0	0	0	0	0	0	0	0	0	0	0
d9b4a920bc357bef49cd0f82e19d65e6	ASV4474	Bacteria	Desulfobacterota	Desulfobulbia	Desulfobulbales	Desulfocapsaceae	SEEP-SRB4	NA	0	0	0	0	0	0	51	26	33	37	11	12	0	0	0	0	0	0	0	0	0	0	0	0	0	65	0	53	165	48	0	0	50	24	0	0	0	11	70	0	0
013e899f98785d7eecc1c3e6c32bcbb4	ASV1389	Bacteria	Desulfobacterota	Desulfobulbia	Desulfobulbales	Desulfocapsaceae	uncultured	uncultured_Desulfobulbaceae	0	0	0	0	0	0	27	28	31	0	0	0	0	0	0	0	0	0	0	0	0	0	0	0	0	43	0	0	80	0	0	0	0	0	0	0	0	0	0	0	0
3de0a0cb7713714f8363eae98d63b097	ASV493	Bacteria	Desulfobacterota	Desulfobulbia	Desulfobulbales	Desulfocapsaceae	uncultured	uncultured_delta	0	0	0	0	0	0	35	29	0	0	0	0	0	0	0	0	0	0	0	0	0	0	0	0	0	0	0	33	0	0	24	0	0	0	0	0	0	0	0	0	0
4ba7077539d3570220cddf688ca0231a	ASV571	Bacteria	Desulfobacterota	Desulfobulbia	Desulfobulbales	Desulfocapsaceae	uncultured	NA	0	0	0	0	0	0	0	0	0	6	0	0	0	0	0	0	0	0	0	0	0	0	0	0	0	29	0	0	0	0	0	0	0	0	0	0	0	0	0	0	0
7246167f77dbc3d2bc64f981bd85e4cc	ASV3251	Bacteria	Desulfobacterota	Desulfovibrionia	Desulfovibrionales	Desulfovibrionaceae	Desulfovibrio	NA	0	0	94	0	0	174	0	0	0	0	0	0	0	20	12	0	0	0	0	0	0	0	0	0	0	0	0	0	0	0	20	0	0	0	0	0	0	0	0	0	0
d8c8ec2bf6fdf376365ac1c54b19fdfd	ASV4469	Bacteria	Desulfobacterota	Desulfovibrionia	Desulfovibrionales	Desulfovibrionaceae	Desulfovibrio	NA	0	0	0	0	0	0	0	0	0	0	0	8	0	0	0	0	0	0	0	0	0	0	0	0	0	0	0	0	0	0	24	0	11	0	28	0	0	0	0	16	0
4f1963654f2148da8cb70296913f5800	ASV667	Bacteria	Desulfobacterota	Desulfovibrionia	Desulfovibrionales	Desulfovibrionaceae	Desulfovibrio	NA	0	0	0	0	0	16	0	0	0	0	0	0	0	0	0	0	0	0	0	0	0	0	0	0	0	32	0	0	0	0	14	0	0	0	0	0	0	0	0	0	0
a27070e4caf39b8db72ca910bdf8ba84	ASV3547	Bacteria	Desulfobacterota	Desulfovibrionia	Desulfovibrionales	Desulfovibrionaceae	Desulfovibrio	uncultured_Desulfovibrionales	0	0	0	0	0	0	0	0	3	7	0	0	0	0	0	0	0	0	0	0	0	0	0	0	0	20	0	0	5	15	0	10	0	0	0	0	0	0	0	0	0
1f2fa4d757618e6ba5fc059fdeda9dc8	ASV256	Bacteria	Desulfobacterota	Desulfovibrionia	Desulfovibrionales	Desulfovibrionaceae	Desulfovibrio	NA	0	0	0	0	0	0	0	0	0	0	0	0	0	0	0	0	0	0	0	0	0	0	0	0	0	0	0	0	0	0	56	0	0	0	0	0	0	0	0	0	0
1c5e857533ccb20a3e0ea8e028dbc080	ASV178	Bacteria	Desulfobacterota	Desulfovibrionia	Desulfovibrionales	Desulfovibrionaceae	Desulfovibrio	NA	0	0	0	0	0	0	0	0	0	0	0	0	0	0	0	0	0	0	0	0	0	0	0	0	0	41	0	0	0	0	0	0	0	0	0	0	0	0	0	0	0
1108cf839a5a2fd6d6649b9e0cf5cfc6	ASV2562	Bacteria	Desulfobacterota	Desulfovibrionia	Desulfovibrionales	Desulfovibrionaceae	Desulfovibrio	NA	0	0	0	0	0	0	0	0	0	0	0	0	0	0	0	0	0	0	0	0	0	0	0	0	0	0	0	0	0	0	0	10	17	13	0	0	0	0	0	0	0
9bd59145d255d9a4bacaa6e660de89ec	ASV1250	Bacteria	Desulfobacterota	Desulfovibrionia	Desulfovibrionales	Desulfovibrionaceae	Desulfovibrio	uncultured_Desulfovibrionales	0	0	0	0	0	0	0	22	0	0	0	0	0	0	0	0	0	0	0	0	0	0	0	0	0	0	0	0	0	0	0	0	0	0	0	0	0	0	0	0	0
3e2236df180c56f91737a4ca4478b84e	ASV504	Bacteria	Desulfobacterota	Desulfovibrionia	Desulfovibrionales	Desulfovibrionaceae	Halodesulfovibrio	NA	0	0	0	0	30	0	8	0	47	3	9	0	0	6	0	29	0	0	14	0	0	0	15	0	0	48	30	7	7	14	37	10	27	13	17	133	51	64	43	9	58
3076839d6670b094a99a665fc15fd7d0	ASV3218	Bacteria	Desulfobacterota	Desulfuromonadia	Desulfuromonadia	Desulfuromonadaceae	Desulfuromonas	NA	0	0	0	0	0	0	0	17	5	0	0	0	0	0	0	0	0	0	0	0	0	0	0	0	0	133	0	6	0	0	0	8	0	0	0	0	0	0	0	0	0
3199880b0898c8e9f6aaeb6932ffa2a8	ASV3220	Bacteria	Desulfobacterota	Desulfuromonadia	Desulfuromonadia	Desulfuromonadaceae	Desulfuromonas	uncultured_bacterium	0	0	0	0	0	0	0	0	0	0	0	0	0	0	0	0	0	0	0	0	0	0	0	0	0	53	0	0	0	0	0	0	14	0	0	0	0	0	0	0	0
22103afe78211b1207e9c6dd171bc15a	ASV2894	Bacteria	Desulfobacterota	Desulfuromonadia	Desulfuromonadia	Geopsychrobacteraceae	Desulfuromusa	NA	0	0	0	0	0	0	0	116	42	45	10	0	0	0	0	0	0	0	0	0	0	0	0	0	0	119	0	0	0	0	0	76	91	31	18	0	0	0	36	0	0
fd2a344bb6130d8def892cc871e08889	ASV5339	Bacteria	Desulfobacterota	Desulfuromonadia	Desulfuromonadia	Geopsychrobacteraceae	Desulfuromusa	NA	0	0	0	0	0	0	0	70	0	0	0	0	0	0	0	0	0	0	0	0	0	0	0	0	0	91	0	0	0	0	0	68	60	0	0	0	0	0	0	0	0
2e480246d8bb38955d3f60756fdf7d22	ASV370	Bacteria	Desulfobacterota	Desulfuromonadia	Desulfuromonadia	Geopsychrobacteraceae	Desulfuromusa	uncultured_bacterium	0	0	0	41	0	0	0	0	0	0	0	0	85	0	0	0	0	0	0	0	0	0	0	0	0	0	0	0	0	0	0	0	0	0	0	0	0	0	0	0	0
370e6bdd39d3ca6c7b487d25945ccc1c	ASV2237	Bacteria	Desulfobacterota	Desulfuromonadia	Desulfuromonadia	Geopsychrobacteraceae	Desulfuromusa	NA	0	0	0	0	0	0	0	0	0	0	0	0	0	0	0	0	0	0	0	0	0	0	0	0	0	22	0	0	0	0	0	0	0	0	0	0	0	0	0	0	0
7df2fcb471376ab9311d4baf9b2c5204	ASV1022	Bacteria	Desulfobacterota	Desulfuromonadia	Desulfuromonadia	Geothermobacteraceae	Geothermobacter	uncultured_bacterium	0	0	0	0	0	0	0	0	0	0	0	0	13	0	0	0	0	0	0	0	0	0	0	0	0	0	0	0	0	0	8	0	0	0	0	0	0	0	0	0	0
e93f8ec84c989cea8e5a84bc93d7f683	ASV4870	Bacteria	Desulfobacterota	Desulfuromonadia	Desulfuromonadia	Geopsychrobacteraceae	NA	NA	0	0	53	0	399	47	72	0	0	0	0	0	0	75	0	0	6	0	233	0	8	87	236	0	0	0	56	43	90	0	715	0	79	0	0	0	0	0	0	0	0
eed53962b42c7cf074a7849b4cbe43a7	ASV5048	Bacteria	Desulfobacterota	Desulfuromonadia	Desulfuromonadia	Geopsychrobacteraceae	NA	NA	0	0	84	0	137	72	100	46	28	0	0	170	68	205	0	0	0	0	118	0	0	0	0	0	0	81	0	0	46	0	0	74	45	0	0	0	0	0	30	0	0
a16aa60225047ce54a2bd370a1bef59f	ASV3469	Bacteria	Desulfobacterota	Desulfuromonadia	Desulfuromonadia	Geopsychrobacteraceae	NA	NA	0	0	0	0	76	0	36	0	0	0	0	0	0	0	0	0	0	0	0	0	0	0	0	12	0	0	53	44	0	27	0	0	0	0	0	0	0	0	0	0	0
89691ef3920ea6650e5a0ca5180f6213	ASV3033	Bacteria	Proteobacteria	Gammaproteobacteria	Diplorickettsiales	Diplorickettsiaceae	Aquicella	uncultured_gamma	68	38	260	67	87	191	34	26	23	0	22	131	23	53	33	30	88	99	24	132	15	146	163	14	29	41	22	10	7	0	64	13	30	36	0	61	29	101	35	70	66
1ff18fdad0a94729e52dd18011bb44ba	ASV276	Bacteria	Proteobacteria	Gammaproteobacteria	Diplorickettsiales	Diplorickettsiaceae	Aquicella	uncultured_gamma	0	0	0	0	0	0	0	0	0	0	0	70	0	0	0	0	0	0	0	0	0	0	0	0	0	0	0	0	0	0	0	0	0	0	0	0	0	0	0	0	0
4478d4f7b5a160ad24314950a11ceea8	ASV2671	Bacteria	Proteobacteria	Gammaproteobacteria	Diplorickettsiales	Diplorickettsiaceae	Aquicella	uncultured_bacterium	0	0	0	0	0	0	0	0	0	8	11	0	0	0	0	0	0	0	0	0	0	0	0	0	0	0	0	0	0	16	0	0	0	20	0	0	0	0	0	0	0
1c39d8aa8ad2290c860385568d44a706	ASV182	Bacteria	Proteobacteria	Gammaproteobacteria	Diplorickettsiales	Diplorickettsiaceae	uncultured	NA	0	0	0	27	0	0	0	0	0	0	0	0	0	0	12	70	0	12	0	5	44	0	0	8	12	0	0	0	0	0	0	0	0	0	0	0	51	41	0	142	11
c8e1e17060a56348715c114099a7f52e	ASV4097	Bacteria	Proteobacteria	Gammaproteobacteria	Diplorickettsiales	Diplorickettsiaceae	uncultured	NA	4	0	18	0	13	3	0	0	0	0	0	0	0	4	0	5	5	0	0	5	0	10	0	10	0	0	0	0	0	0	7	0	0	0	0	0	5	0	0	0	0
8f8803fce5df9028f96641f2bab431ee	ASV1202	Bacteria	Proteobacteria	Gammaproteobacteria	Diplorickettsiales	Diplorickettsiaceae	uncultured	uncultured_bacterium	5	0	0	0	0	0	0	0	0	0	0	0	0	0	0	0	0	0	0	4	5	0	0	8	0	0	0	0	0	0	0	0	0	0	0	0	0	0	0	4	0
e0f30864d33a5e4467b0867f72cc1b0d	ASV4732	Bacteria	Proteobacteria	Gammaproteobacteria	Diplorickettsiales	Diplorickettsiaceae	uncultured	uncultured_gamma	0	0	0	0	0	0	0	0	0	0	0	0	0	0	0	0	0	0	0	0	0	0	0	0	0	0	0	0	0	0	0	0	0	0	0	0	0	0	0	0	25
b82188b74049399d41f3177944f3b7b4	ASV3877	Bacteria	Proteobacteria	Gammaproteobacteria	EC3	EC3	EC3	uncultured_bacterium	5	7	27	30	0	11	17	28	12	0	14	17	5	0	7	5	13	16	10	23	0	8	0	0	14	44	0	17	12	0	17	19	9	13	13	0	16	0	49	0	0
7b182049e60f72cddc15ff7a8f2b6c8b	ASV976	Bacteria	Proteobacteria	Gammaproteobacteria	EC3	EC3	EC3	uncultured_bacterium	0	0	0	0	0	0	0	0	0	0	6	0	0	0	55	0	22	0	0	24	0	0	0	0	9	0	0	0	0	0	0	0	0	41	0	0	0	0	0	0	0
04fae96f04a4b00b1f7f7e2e9abac211	ASV671	Bacteria	Proteobacteria	Gammaproteobacteria	EC3	EC3	EC3	uncultured_bacterium	0	0	0	0	0	0	0	0	0	0	0	23	53	0	0	0	0	0	0	0	0	0	13	9	0	0	0	0	0	0	0	0	4	0	5	0	0	0	0	0	0
c75ec92c1c6c188431718be7a6ed3165	ASV4154	Bacteria	Proteobacteria	Gammaproteobacteria	EC3	EC3	EC3	uncultured_bacterium	0	0	0	0	0	0	0	0	0	0	0	0	0	0	0	0	0	6	0	0	6	0	0	0	0	0	0	0	0	0	0	0	0	0	0	0	8	11	0	35	0
c1a5d6c07c69175440c64b213644a9d3	ASV4035	Bacteria	Proteobacteria	Gammaproteobacteria	EC3	EC3	EC3	uncultured_bacterium	0	0	0	6	16	6	0	0	0	0	0	0	0	0	0	0	0	10	0	8	6	0	0	0	0	0	0	0	0	0	10	0	0	0	0	0	0	0	0	0	0
3a96f240fe22292b942d73057fbd5532	ASV415	Bacteria	Proteobacteria	Gammaproteobacteria	Ectothiorhodospirales	NA	NA	NA	0	0	0	0	0	0	0	14	12	0	0	0	0	0	0	0	0	0	0	0	0	0	0	0	0	18	0	11	0	0	0	0	8	0	0	31	0	0	0	0	0
1870b590bf3d9a9fba30e441f3f678c2	ASV2590	Bacteria	Proteobacteria	Gammaproteobacteria	Ectothiorhodospirales	NA	NA	NA	0	0	19	0	0	0	0	0	0	0	0	12	0	0	0	0	0	0	0	0	0	0	18	0	0	0	0	0	0	0	12	0	0	0	0	0	0	0	0	0	0
22dff3dfe03b8a0cacdb8240b1b946db	ASV1455	Bacteria	Proteobacteria	Gammaproteobacteria	Ectothiorhodospirales	Ectothiorhodospiraceae	NA	NA	0	0	12	0	0	0	0	0	0	0	0	9	0	0	0	0	7	0	0	0	0	0	0	0	0	0	0	0	0	0	8	0	0	0	0	0	0	0	0	0	13
5e7a7977b92897a10bad6f9a11d938c3	ASV767	Bacteria	Proteobacteria	Gammaproteobacteria	Ectothiorhodospirales	NA	NA	NA	0	0	0	0	0	0	0	0	0	0	0	0	0	0	0	0	0	0	0	0	0	18	0	0	0	0	0	0	0	0	0	0	0	0	0	0	0	0	0	0	0
a8eec80fea114c1f8df16947e32efba8	ASV3455	Bacteria	Proteobacteria	Gammaproteobacteria	Ectothiorhodospirales	Thioalkalispiraceae	Thioalkalispira-Sulfurivermis	uncultured_Thioalkalispiraceae	0	0	0	0	0	0	0	21	0	0	0	0	0	0	0	0	0	5	7	0	0	0	0	0	0	11	5	0	0	0	13	0	14	7	0	0	0	0	0	0	0
2e6512bb1221bde0764638d68bbb1174	ASV368	Bacteria	Proteobacteria	Gammaproteobacteria	Ectothiorhodospirales	Thioalkalispiraceae	Thiohalophilus	NA	0	22	0	0	144	51	39	0	0	0	0	59	31	81	0	0	0	0	56	0	0	68	81	0	0	0	0	0	0	0	67	0	0	0	0	0	0	0	0	0	0
10cc11baf0be6fb7a01550da4fcd3e49	ASV1355	Bacteria	Proteobacteria	Gammaproteobacteria	Ectothiorhodospirales	Thioalkalispiraceae	Thiohalophilus	NA	0	17	17	0	59	0	43	0	22	0	0	22	13	30	0	0	0	0	32	0	0	55	37	0	0	0	7	0	10	0	27	28	10	11	0	0	0	0	15	0	0
762a0846e348c71af5ec3d5896bdacd0	ASV2450	Bacteria	Proteobacteria	Gammaproteobacteria	Ectothiorhodospirales	Thioalkalispiraceae	Thiohalophilus	NA	0	0	0	27	18	0	31	0	0	0	0	9	0	0	0	10	0	0	11	0	0	49	16	0	0	0	0	0	0	0	0	0	0	0	0	0	0	0	0	0	0
bae103860876da18a75f978e54a5f97c	ASV3914	Bacteria	Proteobacteria	Gammaproteobacteria	Ectothiorhodospirales	Thioalkalispiraceae	Thiohalophilus	NA	0	0	0	0	0	0	0	0	0	0	0	0	0	0	0	0	0	0	0	0	0	0	0	0	0	50	0	32	0	0	0	0	0	0	0	0	0	0	29	0	0
3b850a0123c12cff3293f62866ce5de0	ASV439	Bacteria	Proteobacteria	Gammaproteobacteria	Ectothiorhodospirales	Thioalkalispiraceae	Thiohalophilus	uncultured_Thioalkalispiraceae	0	0	0	0	0	0	29	0	0	0	0	0	0	0	0	0	0	0	0	0	0	0	0	0	0	0	0	0	0	0	0	0	0	0	0	0	0	0	0	0	0
0cccc3e30b949442c90638beeb4eabba	ASV59	Bacteria	Proteobacteria	Gammaproteobacteria	Enterobacterales	Morganellaceae	Morganellaceae	Sodalis-like_secondary	45	35	0	11	11	0	16	20	0	0	39	6	5	7	4	14	46	46	13	72	33	41	15	27	51	0	17	0	0	0	5	26	9	11	23	22	27	9	29	6	45
fe6c32a9bc2891b706a7097b56e96c85	ASV5357	Bacteria	Entotheonellaeota	Entotheonellia	Entotheonellales	Entotheonellaceae	Candidatus_Entotheonella	uncultured_bacterium	0	0	0	0	0	0	0	0	0	0	0	0	0	0	0	0	5	21	0	0	0	0	0	12	0	0	21	12	0	0	0	0	0	0	0	0	0	0	8	0	0
5abe0640d87b8b5c2295d4015bd4ca12	ASV686	Bacteria	Entotheonellaeota	Entotheonellia	Entotheonellales	Entotheonellaceae	Candidatus_Entotheonella	NA	0	0	0	0	11	0	0	0	0	0	0	0	0	0	0	0	6	0	0	0	0	0	7	3	3	0	0	0	0	0	0	7	0	0	0	8	0	0	0	0	0
384fbc81603c9c07e4962d46dea689d0	ASV2246	Bacteria	Entotheonellaeota	Entotheonellia	Entotheonellales	Entotheonellaceae	Candidatus_Entotheonella	uncultured_bacterium	0	0	0	23	0	0	0	0	0	0	0	0	0	0	0	0	0	0	0	0	0	0	0	0	0	0	0	0	0	0	0	0	0	9	0	0	0	0	0	0	0
e344a27dc4e3b334de39d6b90b79b780	ASV4880	Bacteria	Entotheonellaeota	Entotheonellia	Entotheonellales	Entotheonellaceae	Candidatus_Entotheonella	uncultured_Candidatus	13	0	0	0	0	0	0	0	0	0	0	0	0	0	0	0	0	0	0	12	0	0	0	0	0	0	0	0	0	0	0	0	0	0	0	0	0	0	0	0	0
ad291539f29f155088afe11ffc027933	ASV3651	Bacteria	Entotheonellaeota	Entotheonellia	Entotheonellales	Entotheonellaceae	Candidatus_Entotheonella	uncultured_bacterium	0	0	0	0	0	0	0	0	0	0	0	0	0	0	0	0	0	0	0	0	0	0	0	0	0	0	0	0	0	0	0	0	0	0	0	0	20	0	0	0	0
43c1746ce479e402892c6efda4a61314	ASV1610	Bacteria	Proteobacteria	Gammaproteobacteria	EPR3968-O8a-Bc78	EPR3968-O8a-Bc78	EPR3968-O8a-Bc78	NA	97	94	106	51	30	36	0	69	0	0	0	63	0	37	55	78	53	140	27	141	85	104	181	93	138	23	76	10	10	0	71	46	0	30	0	23	176	105	58	84	126
e7f24edf3255464c01a858b9d6cebea5	ASV4804	Bacteria	Proteobacteria	Gammaproteobacteria	EPR3968-O8a-Bc78	EPR3968-O8a-Bc78	EPR3968-O8a-Bc78	uncultured_bacterium	0	23	14	27	16	17	52	54	45	15	43	0	0	12	26	29	15	21	44	0	20	16	0	34	0	21	28	29	18	0	0	39	20	45	0	0	32	18	43	0	41
5a682bf5cfb8b681a59b037bb8bb0b86	ASV681	Bacteria	Proteobacteria	Gammaproteobacteria	EPR3968-O8a-Bc78	EPR3968-O8a-Bc78	EPR3968-O8a-Bc78	uncultured_bacterium	40	0	0	0	0	0	0	0	0	0	0	0	0	0	0	0	0	0	0	50	0	0	37	0	28	0	0	0	0	0	0	0	0	0	0	0	0	0	0	0	0
57037f9fa41239ecaa6c67836265c88e	ASV2975	Bacteria	Proteobacteria	Gammaproteobacteria	EPR3968-O8a-Bc78	EPR3968-O8a-Bc78	EPR3968-O8a-Bc78	uncultured_bacterium	0	0	0	0	0	0	0	0	0	11	0	0	0	0	0	15	0	14	0	19	12	0	13	0	0	0	0	0	0	0	0	0	18	0	0	0	20	15	0	0	0
67375e1826b5bb7c793aed3415ba0877	ASV2991	Bacteria	Proteobacteria	Gammaproteobacteria	EPR3968-O8a-Bc78	EPR3968-O8a-Bc78	EPR3968-O8a-Bc78	NA	0	0	0	0	0	0	0	0	0	0	0	0	0	0	0	0	0	0	0	0	0	0	0	0	0	0	0	0	0	27	0	0	0	0	0	0	0	0	0	0	0
16334e805d5197ed3e1e28ee0b830e00	ASV2880	Bacteria	Proteobacteria	Gammaproteobacteria	EPR3968-O8a-Bc78	EPR3968-O8a-Bc78	EPR3968-O8a-Bc78	uncultured_bacterium	0	0	0	0	0	0	0	0	0	0	0	0	0	0	0	0	0	0	0	0	0	0	0	0	0	0	0	0	0	0	0	0	0	0	0	24	0	0	0	0	0
01e3135f13e90e9768b7b3f883f83e02	ASV242	Bacteria	Proteobacteria	Gammaproteobacteria	eub62A3	eub62A3	eub62A3	uncultured_organism	18	2	37	43	214	203	0	0	0	0	0	25	63	246	17	11	7	0	55	0	17	5	92	0	0	0	0	0	0	0	36	0	0	0	0	0	0	109	0	0	10
7d87dfb7cd3708d882d92c4e5eb6934d	ASV1004	Bacteria	Proteobacteria	Gammaproteobacteria	eub62A3	eub62A3	eub62A3	NA	0	0	0	0	0	0	0	0	0	0	0	0	0	8	0	0	0	9	0	0	8	0	0	0	0	0	0	0	0	0	0	0	5	0	0	0	0	0	0	0	0
213e9692eba77a6e572e9a2719e92334	ASV2153	Bacteria	Cyanobacteria	Cyanobacteriia	Eurycoccales	Eurycoccales_Incertae_Sedis	Synechococcus_PCC-7336	NA	39	14	22	13	12	12	19	11	0	0	0	0	3	14	0	31	9	56	18	0	24	169	0	6	27	26	0	25	15	0	36	0	0	0	0	11	23	0	33	0	18
91f8f17695b1f028288503d1d7c90427	ASV2020	Bacteria	Cyanobacteria	Cyanobacteriia	Eurycoccales	Eurycoccales_Incertae_Sedis	Synechococcus_PCC-7336	NA	0	0	0	0	0	0	0	0	0	0	0	0	0	0	0	0	0	0	0	197	0	0	0	0	0	0	0	0	0	0	0	0	0	0	0	0	0	0	0	0	0
f3e55b58bf56f49280e9c5e851366d4a	ASV5105	Bacteria	Cyanobacteria	Cyanobacteriia	Eurycoccales	Eurycoccales_Incertae_Sedis	Synechococcus_PCC-7336	NA	0	0	0	0	0	0	0	0	0	0	0	0	0	0	0	0	0	0	0	0	0	0	32	0	0	0	0	0	0	0	0	0	0	0	0	0	0	0	0	0	0
e78d7551f0c801e18059b297340d80ce	ASV4864	Bacteria	Cyanobacteria	Cyanobacteriia	Eurycoccales	Eurycoccales_Incertae_Sedis	Synechococcus_PCC-7336	Oscillatoriales_cyanobacterium	0	0	0	0	25	0	0	0	0	0	0	0	0	0	0	0	0	0	0	0	0	0	0	0	0	0	0	0	0	0	0	0	0	0	0	0	0	0	0	0	0
0aae7ac9a4632934a898e3ae3cc5ff68	ASV13	Bacteria	Proteobacteria	Gammaproteobacteria	EV818SWSAP88	EV818SWSAP88	EV818SWSAP88	uncultured_gamma	10	13	0	0	0	0	0	0	0	0	0	0	0	0	0	0	0	30	0	8	18	24	37	0	13	0	0	0	0	0	0	0	0	0	0	4	9	28	0	0	20
d6b34bbee8acadf9b74f51333d72c449	ASV4453	Bacteria	Proteobacteria	Gammaproteobacteria	EV818SWSAP88	EV818SWSAP88	EV818SWSAP88	uncultured_bacterium	0	0	0	0	0	0	0	19	7	0	0	11	0	0	0	5	0	0	0	0	0	22	0	0	0	9	0	0	0	0	0	11	8	0	0	0	0	0	0	0	0
c54f09b3dbf2c4809fa05f83614fa75f	ASV4147	Bacteria	Proteobacteria	Gammaproteobacteria	EV818SWSAP88	EV818SWSAP88	EV818SWSAP88	uncultured_bacterium	0	0	0	0	0	0	0	0	0	0	0	0	0	0	0	0	0	0	0	0	0	0	0	0	0	0	0	0	0	0	0	0	0	0	0	0	0	0	0	78	0
92f4115fd42a82fb342e3a460be6f6e6	ASV2027	Bacteria	Proteobacteria	Gammaproteobacteria	EV818SWSAP88	EV818SWSAP88	EV818SWSAP88	NA	0	0	0	0	0	0	0	0	0	0	0	0	0	27	0	0	0	0	0	0	0	0	14	0	0	0	0	0	0	0	0	0	0	0	0	0	0	0	0	0	0
691996b10c516337fb7bba6d97bea0ba	ASV3159	Bacteria	FCPU426	FCPU426	FCPU426	FCPU426	FCPU426	uncultured_bacterium	0	0	3	0	17	0	0	9	20	0	0	0	0	0	0	0	0	3	6	0	0	0	0	0	0	0	11	0	5	0	0	12	4	16	25	23	0	0	0	0	0
3f59f6911e45955be4871609cf11ad5d	ASV526	Bacteria	Fibrobacterota	Fibrobacteria	Fibrobacterales	Fibrobacteraceae	NA	NA	0	0	0	0	0	0	0	0	0	0	0	0	0	0	0	0	0	0	0	0	0	0	0	0	0	0	0	0	0	0	0	0	0	0	0	0	0	0	0	0	34
b2009d116488adb5da2cc9a26650bdd4	ASV3854	Bacteria	Fibrobacterota	Fibrobacteria	Fibrobacterales	Fibrobacteraceae	uncultured	uncultured_bacterium	0	0	0	0	5	0	0	0	0	0	0	0	0	0	0	0	0	0	0	0	0	0	0	0	0	0	0	0	0	0	0	0	0	0	167	1701	0	0	0	0	0
091e9138fd3006649d38ee28b5edc3a4	ASV2017	Bacteria	Fibrobacterota	Fibrobacteria	Fibrobacterales	Fibrobacteraceae	uncultured	uncultured_organism	15	4	6	0	16	0	12	18	14	0	5	0	0	12	0	0	7	7	10	7	8	8	0	7	10	14	0	0	0	0	0	16	12	6	15	13	12	0	8	7	0
6c42d10feaa13db522c29135a7d9626d	ASV851	Bacteria	Fibrobacterota	Fibrobacteria	Fibrobacterales	Fibrobacteraceae	uncultured	uncultured_bacterium	0	0	0	0	0	0	0	0	0	0	0	0	0	0	0	0	0	0	0	0	0	0	0	0	0	0	0	0	0	0	0	0	0	0	44	33	0	0	0	0	0
e22bcba73983316fbb9ab8c07ddbdfe1	ASV4829	Bacteria	Fibrobacterota	Fibrobacteria	Fibrobacterales	Fibrobacteraceae	uncultured	NA	0	15	0	0	0	0	0	0	2	0	0	0	0	0	0	0	0	0	5	0	0	0	0	0	8	0	0	0	0	12	0	5	0	0	3	0	0	19	0	0	0
8005e7cb23cf7352b6c000a556d3a5eb	ASV2789	Bacteria	Fibrobacterota	Fibrobacteria	Fibrobacterales	Fibrobacteraceae	uncultured	uncultured_bacterium	0	0	0	0	0	0	0	0	0	0	0	0	0	0	0	0	0	0	0	0	0	0	0	0	0	0	0	0	0	0	0	0	0	0	47	0	0	0	0	0	0
132fa0e29cdbbb7ec9f8b8347fb2ac0c	ASV2114	Bacteria	Fibrobacterota	Fibrobacteria	Fibrobacterales	Fibrobacteraceae	uncultured	uncultured_bacterium	0	0	0	0	0	0	0	10	0	0	0	0	0	0	0	0	0	0	0	0	0	0	0	0	0	15	0	0	4	0	0	0	0	0	0	0	0	0	0	0	0
8408aeca698491c162074836843ec592	ASV2803	Bacteria	Fibrobacterota	Fibrobacteria	Fibrobacterales	Fibrobacteraceae	uncultured	uncultured_Fibrobacteres	0	0	0	0	0	0	0	0	0	0	0	0	0	0	0	0	0	0	0	0	0	0	0	0	0	0	0	0	0	0	0	0	0	0	0	0	0	0	0	0	0
107da56fa998e2ca18b39f4d1e24c139	ASV2100	Bacteria	Fibrobacterota	Fibrobacteria	Fibrobacterales	Fibrobacteraceae	uncultured	uncultured_bacterium	0	0	0	0	0	0	0	0	0	0	0	0	0	0	0	0	0	0	0	0	0	0	0	0	0	0	0	0	0	0	0	0	0	0	0	26	0	0	0	0	0
aca5036b639987f929e7bb1c65e952dd	ASV3630	Bacteria	Fibrobacterota	Fibrobacteria	Fibrobacterales	Fibrobacteraceae	uncultured	uncultured_bacterium	0	0	0	0	0	0	0	0	0	0	12	0	0	0	0	0	0	0	0	0	0	0	0	0	0	0	0	0	0	0	0	0	0	0	0	0	0	0	9	0	0
78de871288ca6d6fcb04565e92471c28	ASV1895	Bacteria	Fibrobacterota	Fibrobacteria	Fibrobacterales	Fibrobacteraceae	uncultured	uncultured_bacterium	0	13	0	0	0	0	0	0	0	0	0	0	0	0	5	2	0	0	0	0	0	0	0	0	0	0	0	0	0	0	0	0	0	0	0	0	0	0	0	0	0
5c4a342016347e01d8db34fea9b34ce0	ASV718	Bacteria	Armatimonadota	Fimbriimonadia	Fimbriimonadales	Fimbriimonadaceae	Fimbriimonadaceae	uncultured_bacterium	10	0	0	2	0	0	0	3	0	0	0	0	0	0	4	6	0	4	0	0	4	0	0	0	9	0	4	0	0	0	0	0	0	7	0	0	17	0	3	5	9
b949794724523bb3913b4a631993bc51	ASV3892	Bacteria	Bacteroidota	Bacteroidia	Flavobacteriales	Flavobacteriaceae	Actibacter	NA	0	0	0	0	24	0	29	10	0	0	0	0	13	0	0	0	0	0	0	0	0	0	0	0	0	25	0	24	15	0	0	14	0	0	0	0	0	29	0	0	0
2b2a9f136fa7173b6fbeab079170a0d1	ASV298	Bacteria	Bacteroidota	Bacteroidia	Flavobacteriales	Flavobacteriaceae	Actibacter	NA	0	0	0	0	22	0	0	0	19	24	11	0	0	8	0	0	0	0	0	0	0	0	0	0	0	0	0	0	0	0	0	0	24	0	0	0	0	0	23	0	0
5c112121afaa22ae512dbe6f9a59ebd3	ASV726	Bacteria	Bacteroidota	Bacteroidia	Flavobacteriales	Flavobacteriaceae	Aquibacter	NA	362	261	291	210	319	240	93	163	85	33	117	217	195	196	236	280	253	338	82	457	247	243	287	336	328	103	88	75	76	41	391	70	42	108	207	359	342	362	123	213	217
7a6ad42ecdd458cda9126990a247cdf0	ASV934	Bacteria	Bacteroidota	Bacteroidia	Flavobacteriales	Flavobacteriaceae	Aquibacter	uncultured_bacterium	175	16	9	0	74	0	65	90	98	25	32	24	23	39	37	31	0	11	28	12	0	0	258	30	44	59	46	68	39	48	85	84	88	55	39	34	17	49	64	30	38
e278b7fca824568472dd94a85503d6bf	ASV4877	Bacteria	Bacteroidota	Bacteroidia	Flavobacteriales	Flavobacteriaceae	Aquibacter	NA	32	0	0	38	57	0	63	87	98	34	64	26	33	0	31	25	41	56	28	38	39	0	62	0	33	75	38	35	41	0	62	58	92	46	29	55	41	53	90	31	36
ad2c46ab275d1aad4621041d48a84346	ASV3637	Bacteria	Bacteroidota	Bacteroidia	Flavobacteriales	Flavobacteriaceae	Aquibacter	uncultured_bacterium	0	0	0	0	0	0	130	152	148	66	87	0	0	0	0	0	0	0	19	0	0	0	0	0	0	82	90	60	29	53	0	76	178	53	0	0	0	0	139	0	0
9b4f5a8b833c3fe99de60641b53f1b20	ASV1238	Bacteria	Bacteroidota	Bacteroidia	Flavobacteriales	Flavobacteriaceae	Aquibacter	NA	0	37	75	59	27	40	40	44	0	0	0	27	83	28	51	22	23	0	28	48	27	42	30	87	0	29	0	62	25	67	31	0	0	0	0	0	0	43	20	0	0
e0b5518d5d06ce7eb1837de86b77ce19	ASV4722	Bacteria	Bacteroidota	Bacteroidia	Flavobacteriales	Flavobacteriaceae	Aquibacter	NA	0	0	25	0	0	0	0	77	0	0	60	0	17	0	0	0	0	0	0	8	0	0	0	10	0	80	0	56	0	0	0	0	48	46	0	0	0	0	93	0	0
15a86f93bcb0a641e78a034b8596e4fd	ASV1401	Bacteria	Bacteroidota	Bacteroidia	Flavobacteriales	Flavobacteriaceae	Aquibacter	uncultured_bacterium	0	0	0	0	0	0	20	62	59	0	0	0	0	0	0	0	0	0	0	0	0	0	0	0	0	29	0	0	0	0	0	27	25	0	0	0	0	0	21	0	0
08dd1c2fedef6c2769d785ce0c413d43	ASV1154	Bacteria	Bacteroidota	Bacteroidia	Flavobacteriales	Flavobacteriaceae	Aquibacter	NA	0	0	0	0	0	0	69	0	31	40	0	0	0	0	0	0	0	0	0	0	0	0	0	0	0	0	26	0	0	0	0	15	0	0	0	0	0	0	0	0	0
61f9d6c466efad9bbb0c152cfa2f34b4	ASV1746	Bacteria	Bacteroidota	Bacteroidia	Flavobacteriales	Flavobacteriaceae	Aquibacter	NA	0	0	0	0	0	0	0	56	26	0	0	0	0	0	0	0	0	0	0	0	0	0	0	0	0	0	0	0	0	0	0	0	59	0	0	0	0	0	27	0	0
5b263818d78708808a8aee3ee1d43211	ASV701	Bacteria	Bacteroidota	Bacteroidia	Flavobacteriales	Flavobacteriaceae	Aquibacter	NA	0	0	0	0	0	0	0	0	0	0	0	0	6	0	0	0	0	0	7	0	0	0	0	0	0	0	0	0	0	0	0	0	10	0	0	21	0	0	0	0	0
a0d80456c730f332f3d52ac7b2035838	ASV3390	Bacteria	Bacteroidota	Bacteroidia	Flavobacteriales	Flavobacteriaceae	Aquibacter	NA	0	0	0	0	0	0	0	19	0	0	16	0	0	0	0	0	0	0	0	0	0	0	0	0	0	0	0	0	0	0	0	0	0	0	0	0	0	0	0	0	0
3f067ac360731fd2f3ed69791a639816	ASV527	Bacteria	Bacteroidota	Bacteroidia	Flavobacteriales	Flavobacteriaceae	Aquimarina	Aquimarina_salinaria	904	553	989	759	1091	878	599	903	580	249	333	647	533	475	612	1196	1216	1521	272	872	1561	712	777	441	792	549	317	350	174	136	1548	655	327	419	438	1154	1560	1059	580	346	535
5297a8bf7182a30a132e089d9316b0b7	ASV2697	Bacteria	Bacteroidota	Bacteroidia	Flavobacteriales	Flavobacteriaceae	Aquimarina	Aquimarina_spongiae	853	514	733	617	1986	646	152	420	186	72	119	415	419	301	845	928	778	937	150	815	1369	538	646	417	1026	153	70	131	72	25	1206	170	115	84	312	1011	1346	826	168	278	418
8eb6f28ca859062f33e55a04ffd15222	ASV1179	Bacteria	Bacteroidota	Bacteroidia	Flavobacteriales	Flavobacteriaceae	Aquimarina	NA	22	0	9	16	7	0	0	0	0	0	0	8	0	0	4	7	0	0	0	8	24	0	9	0	15	0	0	0	0	0	19	0	0	0	0	7	49	19	0	0	0
37408498d92578c668c54923f23e29e8	ASV3292	Bacteria	Bacteroidota	Bacteroidia	Flavobacteriales	Flavobacteriaceae	Aureisphaera	uncultured_Bacteroidetes	26	23	88	47	48	12	60	0	33	0	54	23	60	46	58	81	74	99	0	76	95	81	28	78	36	59	0	68	33	0	60	0	0	37	14	59	0	0	68	30	37
1fc4824cfe5681bc34cc0ff2868ea9ec	ASV275	Bacteria	Bacteroidota	Bacteroidia	Flavobacteriales	Flavobacteriaceae	Aureisphaera	Aureisphaera_galaxeae	0	0	0	0	0	0	64	73	32	24	40	0	0	0	0	0	0	0	19	0	15	0	0	0	0	25	24	21	11	30	0	35	27	61	0	0	0	0	41	0	0
3b720817f59cde9ae07507e83346a36a	ASV442	Bacteria	Bacteroidota	Bacteroidia	Flavobacteriales	Flavobacteriaceae	Aureisphaera	uncultured_Bacteroidetes	0	0	0	0	0	0	74	0	0	68	0	0	0	0	0	0	0	0	52	0	0	0	0	0	0	0	21	0	0	0	0	0	30	0	0	0	0	75	0	0	0
4abb88bb7fe72ade3a82662c117e5ec5	ASV545	Bacteria	Bacteroidota	Bacteroidia	Flavobacteriales	Flavobacteriaceae	Aureisphaera	Aureisphaera_salina	0	0	0	25	0	0	0	62	15	0	10	0	0	0	0	0	0	0	0	0	0	0	0	0	0	26	31	11	0	0	0	0	0	27	0	0	0	0	20	0	0
3d8142ca61cfd9c3c170bb72601f8a79	ASV484	Bacteria	Bacteroidota	Bacteroidia	Flavobacteriales	Flavobacteriaceae	Aureisphaera	uncultured_Bacteroidetes	0	0	0	0	0	0	0	39	0	0	0	0	0	0	0	0	0	0	0	0	0	0	0	0	0	0	0	0	0	136	0	0	0	0	0	0	0	0	0	0	0
0bbb0c8adecf71cdc9f8ebc18cb1a5ec	ASV40	Bacteria	Bacteroidota	Bacteroidia	Flavobacteriales	Flavobacteriaceae	Aureisphaera	Aureisphaera_galaxeae	0	0	0	0	0	0	10	11	0	0	0	0	0	0	0	0	0	0	0	0	0	0	0	0	0	21	0	0	0	0	0	0	0	16	0	0	5	0	0	0	0
940dbaf278d9b1655a8ddb7a2c02b50c	ASV2532	Bacteria	Bacteroidota	Bacteroidia	Flavobacteriales	Flavobacteriaceae	Aureitalea	Aureitalea_marina	0	0	0	0	15	0	0	0	0	0	0	0	0	0	0	0	0	0	0	0	0	0	0	0	0	0	0	0	0	0	0	0	0	0	0	0	0	11	0	0	0
d2d00622f091ff4fc53b905496fa89b3	ASV4415	Bacteria	Bacteroidota	Bacteroidia	Flavobacteriales	Flavobacteriaceae	Aureitalea	Aureitalea_marina	0	0	0	0	0	0	27	0	0	0	0	0	0	0	0	0	0	0	0	0	0	0	0	0	0	0	0	0	0	0	0	0	9	0	0	0	0	0	0	0	0
0c23aebaa3118140479186d29259d048	ASV52	Bacteria	Bacteroidota	Bacteroidia	Flavobacteriales	Crocinitomicaceae	Crocinitomix	uncultured_bacterium	34	0	14	16	21	0	0	0	0	0	0	20	19	0	0	23	0	14	0	31	59	0	20	19	41	0	0	0	0	0	44	0	0	0	0	0	41	35	0	0	24
282836fb8aa28248ba177f2db2f9f41c	ASV3095	Bacteria	Bacteroidota	Bacteroidia	Flavobacteriales	Crocinitomicaceae	Crocinitomix	uncultured_bacterium	0	0	0	0	20	0	18	55	38	0	12	16	0	0	0	0	0	19	0	0	0	0	0	9	0	26	18	21	26	0	16	18	23	0	20	14	0	0	28	0	0
371e13c6eb2b580f482e74a5649b8c8e	ASV2238	Bacteria	Bacteroidota	Bacteroidia	Flavobacteriales	Crocinitomicaceae	Crocinitomix	uncultured_bacterium	0	0	0	8	0	0	0	19	0	6	0	0	0	0	0	0	0	0	10	9	0	0	6	0	0	0	0	0	0	0	15	0	0	22	0	15	21	0	26	0	0
ca73178878a8919393299e01f6eb3d97	ASV4277	Bacteria	Bacteroidota	Bacteroidia	Flavobacteriales	Crocinitomicaceae	Crocinitomix	uncultured_bacterium	0	0	0	0	0	0	11	6	0	12	0	0	0	0	0	0	0	0	21	0	0	0	0	0	0	0	0	19	6	0	0	24	0	0	0	0	0	11	12	0	0
00b036a0b0866658203b90823c017d2e	ASV31	Bacteria	Bacteroidota	Bacteroidia	Flavobacteriales	Crocinitomicaceae	Crocinitomix	uncultured_bacterium	0	5	13	0	28	0	0	0	0	0	0	0	0	0	0	0	5	0	0	0	0	0	0	0	0	0	0	0	0	0	0	0	0	6	0	16	13	0	0	0	0
6458658743f78f6bd5e8ab3be366deda	ASV3354	Bacteria	Bacteroidota	Bacteroidia	Flavobacteriales	Crocinitomicaceae	Crocinitomix	uncultured_bacterium	0	0	0	0	14	13	0	0	0	0	0	0	11	0	0	0	0	0	0	0	0	0	0	0	0	0	0	0	0	0	14	0	29	0	0	0	0	0	0	0	0
f31c706bc4dc36e1e545e75e0a28e867	ASV5173	Bacteria	Bacteroidota	Bacteroidia	Flavobacteriales	Crocinitomicaceae	Crocinitomix	uncultured_bacterium	9	0	0	0	0	0	0	0	0	0	0	0	0	18	0	0	0	0	0	0	0	0	19	0	15	0	0	0	0	0	0	0	0	0	0	0	0	0	0	0	0
a77a905db1181fdef1ee6136d041990e	ASV3496	Bacteria	Bacteroidota	Bacteroidia	Flavobacteriales	Crocinitomicaceae	Crocinitomix	uncultured_bacterium	0	0	0	0	0	0	0	0	0	0	0	0	0	0	34	25	0	0	0	0	0	0	0	0	0	0	0	0	0	0	0	0	0	0	0	0	0	0	0	0	0
736ff8523c1d5334f5eabf04a46dfba4	ASV2434	Bacteria	Bacteroidota	Bacteroidia	Flavobacteriales	Crocinitomicaceae	Crocinitomix	NA	0	0	0	0	9	0	8	0	0	0	0	0	0	0	0	0	0	0	0	0	0	0	0	0	0	0	0	0	0	0	0	0	0	0	0	0	0	0	18	0	0
2de05fb61964dca2f90bd583746579f9	ASV352	Bacteria	Bacteroidota	Bacteroidia	Flavobacteriales	Crocinitomicaceae	Crocinitomix	uncultured_bacterium	0	0	0	0	0	0	0	0	0	0	0	0	0	0	0	16	0	0	0	0	18	0	0	0	0	0	0	0	0	0	0	0	0	0	0	0	0	0	0	0	0
2a068b16791087e0cbcff90fe368fe7c	ASV283	Bacteria	Bacteroidota	Bacteroidia	Flavobacteriales	Crocinitomicaceae	Crocinitomix	uncultured_bacterium	0	0	17	0	0	0	0	0	0	0	0	0	0	0	0	0	0	0	0	0	0	0	0	0	0	0	0	0	0	0	0	0	0	0	0	0	0	0	0	6	0
34f029ad48cf9cbeedd8bd495a9edf8a	ASV1549	Bacteria	Bacteroidota	Bacteroidia	Flavobacteriales	Cryomorphaceae	Cryomorpha	uncultured_organism	6	0	16	18	15	18	78	0	0	0	6	19	0	0	14	0	0	33	0	0	0	0	15	0	0	6	0	164	0	0	38	0	0	0	0	0	0	93	0	3	9
8bc4f05f31f823c8a6e0b75b83f03734	ASV1111	Bacteria	Bacteroidota	Bacteroidia	Flavobacteriales	Cryomorphaceae	Cryomorpha	NA	0	0	0	0	3	0	0	7	0	0	0	0	18	0	0	0	0	0	49	0	0	0	0	0	0	11	0	13	0	10	0	0	0	0	0	0	0	0	0	0	0
3ad2fff490cafb75ab9a35e7985649b7	ASV427	Bacteria	Bacteroidota	Bacteroidia	Flavobacteriales	Cryomorphaceae	Cryomorpha	uncultured_deep-sea	0	0	0	0	0	0	7	0	0	0	0	0	0	0	12	0	0	0	0	0	0	0	0	0	0	0	0	0	0	0	0	0	0	7	0	17	0	9	0	0	0
0042205561c589d739a82489880041e1	ASV3294	Bacteria	Bacteroidota	Bacteroidia	Flavobacteriales	Cryomorphaceae	Cryomorpha	uncultured_organism	0	10	44	0	0	0	0	0	0	0	0	0	0	0	0	0	0	0	0	0	0	0	0	0	0	0	0	0	0	23	0	0	6	0	0	0	0	0	0	0	0
ee533bf8eb81d201af1b37bf1e620f9b	ASV5037	Bacteria	Bacteroidota	Bacteroidia	Flavobacteriales	Flavobacteriaceae	Dokdonia	NA	0	0	0	14	0	0	13	0	0	0	0	0	0	0	7	14	5	0	0	0	0	8	0	10	0	0	0	39	0	0	0	0	0	3	0	7	6	0	11	0	0
b41e13e6008ce5abe7083c8b11b58154	ASV3794	Bacteria	Bacteroidota	Bacteroidia	Flavobacteriales	Flavobacteriaceae	Flavobacteriaceae	Lutaonella_thermophila	0	0	0	0	0	0	856	962	814	221	343	0	0	0	0	0	0	0	167	0	0	0	0	0	0	805	259	429	327	265	0	649	786	382	0	0	0	0	1066	0	0
1dd43422d57cb53c0b11cc14b274af28	ASV219	Bacteria	Bacteroidota	Bacteroidia	Flavobacteriales	Flavobacteriaceae	Flavobacteriaceae	Muricauda_sp.	0	0	0	0	0	0	32	26	0	0	14	0	0	0	0	0	0	0	0	0	0	0	0	0	0	21	0	70	16	68	0	0	12	0	0	0	0	0	29	0	0
6c2c48be5a787908d925fc5c0754c7b0	ASV848	Bacteria	Bacteroidota	Bacteroidia	Flavobacteriales	Crocinitomicaceae	Fluviicola	NA	0	0	0	0	0	0	10	0	0	0	0	0	0	0	13	0	6	0	0	16	0	0	0	8	0	23	0	0	0	0	0	0	0	0	110	12	0	0	0	5	0
4f9c016807fc463280f5f247a5b5a701	ASV658	Bacteria	Bacteroidota	Bacteroidia	Flavobacteriales	Crocinitomicaceae	Fluviicola	NA	0	0	0	0	0	0	0	0	0	0	0	0	0	0	0	0	0	0	0	0	0	0	0	0	0	0	0	6	0	0	0	0	0	0	0	0	0	0	0	0	0
d0109f671e69f3e8904c5495885f7a09	ASV4508	Bacteria	Bacteroidota	Bacteroidia	Flavobacteriales	Flavobacteriaceae	Gilvibacter	Gilvibacter_sediminis	0	0	99	80	63	79	191	452	119	98	154	0	0	42	99	57	48	70	62	61	52	79	0	71	23	153	91	181	88	70	84	93	89	96	53	0	0	44	201	22	0
02defb1df63e095b23e7c4433b6e716d	ASV354	Bacteria	Bacteroidota	Bacteroidia	Flavobacteriales	Flavobacteriaceae	Gilvibacter	Gilvibacter_sediminis	55	0	0	0	0	0	267	180	93	0	91	44	45	0	0	80	44	0	0	60	93	0	55	0	0	162	63	356	63	141	0	47	98	107	0	33	0	0	183	0	47
c63fd3edcc9476d7d5996efdf3c0d0b4	ASV4148	Bacteria	Bacteroidota	Bacteroidia	Flavobacteriales	Flavobacteriaceae	Gilvibacter	uncultured_Flavobacteriaceae	0	0	0	0	0	0	0	0	0	0	14	0	0	0	0	0	0	0	0	0	0	0	0	0	0	12	0	0	0	0	0	0	0	0	0	0	0	0	0	0	0
84556fb23a6537e6d94d2d77ce4b8b75	ASV3021	Bacteria	Bacteroidota	Bacteroidia	Flavobacteriales	Flavobacteriaceae	Hanstruepera	Hanstruepera_neustonica	0	0	34	0	0	0	0	0	0	19	0	0	0	0	0	0	0	0	0	0	0	0	0	0	0	0	0	0	0	0	0	0	0	0	0	0	0	0	0	0	0
c7177abed8186f2fd9ba959476a433c9	ASV4227	Bacteria	Bacteroidota	Bacteroidia	Flavobacteriales	Flavobacteriaceae	Imtechella	Imtechella_halotolerans	2874	441	287	265	785	353	41	34	39	14	35	326	260	368	456	581	181	663	173	513	179	596	1731	924	1344	28	38	22	15	0	1217	27	20	50	561	993	865	796	51	424	629
7708672a73667e0e459c357aa8a3a805	ASV3252	Bacteria	Bacteroidota	Bacteroidia	Flavobacteriales	Flavobacteriaceae	Kordia	uncultured_Bacteroidetes	0	0	294	0	0	0	14	0	0	0	0	639	0	35	87	0	0	21	54	0	227	15	0	0	0	0	0	0	0	28	0	0	0	291	19	0	0	0	0	0	0
2941a11ec940f60d7da710696664f52b	ASV2628	Bacteria	Bacteroidota	Bacteroidia	Flavobacteriales	Flavobacteriaceae	Kordia	NA	0	0	82	0	25	16	0	10	12	32	0	0	22	0	0	0	0	0	0	0	0	0	0	0	0	43	15	247	0	92	42	0	6	0	0	0	0	0	49	0	5
69aa738b434a5bf3c88a758dcad5702e	ASV1811	Bacteria	Bacteroidota	Bacteroidia	Flavobacteriales	Flavobacteriaceae	Kordia	NA	0	0	0	0	0	0	0	0	0	0	0	0	0	0	0	12	0	0	0	0	0	0	0	0	0	0	0	0	0	0	0	0	0	0	57	0	0	0	0	0	0
780e4332148f96228656d850f40bfa77	ASV2459	Bacteria	Bacteroidota	Bacteroidia	Flavobacteriales	Flavobacteriaceae	Leptobacterium	Leptobacterium_flavescens	55	43	92	79	85	63	0	5	0	0	0	48	57	45	44	98	62	78	23	115	44	56	65	77	67	0	0	10	0	0	83	0	9	11	42	72	86	97	6	39	42
dc556bcbea0e2d163dceb6b5d920f5f3	ASV4631	Bacteria	Bacteroidota	Bacteroidia	Flavobacteriales	Flavobacteriaceae	Lutibacter	NA	0	0	0	34	12	0	0	0	0	0	0	49	0	0	0	0	0	0	0	0	0	0	0	0	0	0	0	0	0	0	0	0	0	0	0	0	0	0	0	0	0
2341b502998112eaff746db294bf514b	ASV2608	Bacteria	Bacteroidota	Bacteroidia	Flavobacteriales	Flavobacteriaceae	Lutibacter	NA	0	0	0	0	0	0	6	0	0	0	0	0	0	0	0	0	0	0	0	0	0	0	0	0	0	34	0	0	0	0	0	0	14	0	0	0	0	0	0	0	0
d5898a4960ccb977dc81c8f62667372c	ASV4541	Bacteria	Bacteroidota	Bacteroidia	Flavobacteriales	Flavobacteriaceae	Muricauda	NA	71	66	360	200	121	123	123	86	31	25	17	143	162	84	121	91	91	97	67	114	134	162	68	88	52	65	0	116	57	253	146	19	20	15	54	69	35	143	44	109	33
231a61f702f516fdb391360bc121d407	ASV2158	Bacteria	Bacteroidota	Bacteroidia	Flavobacteriales	Flavobacteriaceae	Muricauda	NA	62	24	91	44	127	51	174	184	144	57	73	62	38	33	43	18	33	36	55	44	14	59	64	26	32	139	18	180	128	75	69	78	137	83	15	43	16	43	170	23	10
a3308127f8f55b6523716012518f188f	ASV3565	Bacteria	Bacteroidota	Bacteroidia	Flavobacteriales	Flavobacteriaceae	Muricauda	NA	0	0	0	0	0	0	234	251	129	83	140	0	0	0	0	0	0	0	43	0	0	0	0	0	0	199	55	233	149	120	0	88	73	71	0	0	0	0	181	0	0
6f9d5076c31edfcb1c106dcb2bf0f3ab	ASV919	Bacteria	Bacteroidota	Bacteroidia	Flavobacteriales	Flavobacteriaceae	Muricauda	NA	21	0	41	35	52	0	176	146	58	55	46	25	17	23	10	0	15	0	70	21	30	37	0	0	0	122	17	236	162	138	0	45	34	30	0	0	0	0	107	18	0
[truncated: 3,651 more rows]
[truncated: 1 more columns]
