# Supplementary material for: Reef Sediments Can Act As a Stony Coral Tissue Loss Disease Vector
Source: Frontiers journal article supplement (doi:10.3389/fmars.2021.815698), 2022-01-13
Supplement: Table_1.xlsx [file Table_1.xlsx]

## Sheet: Sheet1
Test	Comparison	df	Test Statistic	R2	p Value
PERMANOVA (Treatment)	Species	1	1.3506	0.023	ns
	Treatment	2	10.0454	0.338	0.001
	Species:Treatment	2	1.0266	0.035	ns
	HS - BDS	1	15.466	0.364	0.002
	HS - IDS	1	1.239	0.045	ns
	BDS - IDS	1	12.319	0.33	0.002
(Filtered Treatment)	Species	1	1.7067	0.061	0.036
	Treatment	2	1.2774	0.046	ns
	Species:Treatment	2	1.0031	0.036	ns
PERMANOVA (Condition)	Species	1	1.0237	0.023	ns
	Treatment	2	2.929	0.13	0.003
	Species:Treatment	2	1.1072	0.049	ns
	Control - NAI	1	4.533	0.139	0.003
	Control - TL	1	4.031	0.139	0.003
	NAI - TL	1	0.623	0.024	ns
(Filtered Condition)	Species	1	1.7684	0.061	0.041
	Treatment	2	1.3416	0.093	ns
	Species:Treatment	2	1.2736	0.088	ns
