# Supplementary material for: Reef Sediments Can Act As a Stony Coral Tissue Loss Disease Vector
Source: Frontiers journal article supplement (doi:10.3389/fmars.2021.815698), 2022-01-13
Supplement: Table_2.xlsx [file Table_2.xlsx]

## Sheet: Sheet1
Phylum	Class	Order	Family	Genus	Species	ASV ID	TL-enriched	IDS-enriched
Bacteroidota	Bacteroidia	Chitinophagales	Saprospiraceae	uncultured	uncultured_Sphingobacterium	ASV1224	yes
Bacteroidota	Bacteroidia	Chitinophagales	uncultured	uncultured		ASV1057	yes
Bacteroidota	Bacteroidia	Chitinophagales	uncultured	uncultured	uncultured_bacterium	ASV2087	yes
Bacteroidota	Bacteroidia	Chitinophagales	Saprospiraceae	uncultured		ASV3089	yes
Bacteroidota	Bacteroidia	Chitinophagales	uncultured	uncultured	uncultured_Sphingobacteriales	ASV534	yes
Bacteroidota	Bacteroidia	Chitinophagales	uncultured	uncultured	uncultured_organism	ASV4527	yes
Bacteroidota	Bacteroidia	Chitinophagales	Saprospiraceae	uncultured	uncultured_Sphingobacterium	ASV3884	yes
Bacteroidota	Bacteroidia	Chitinophagales	uncultured	uncultured	uncultured_Bacteroidetes	ASV2124	yes
Bacteroidota	Bacteroidia	Chitinophagales	Saprospiraceae	uncultured	uncultured_marine	ASV2754	yes
Bacteroidota	Bacteroidia	Chitinophagales	Saprospiraceae	uncultured		ASV2378	yes
Bacteroidota	Bacteroidia	Chitinophagales	Saprospiraceae	uncultured	uncultured_Sphingobacteriia	ASV843	yes
Bacteroidota	Bacteroidia	Chitinophagales	Saprospiraceae	uncultured		ASV3285	yes
Bacteroidota	Bacteroidia	Chitinophagales	uncultured	uncultured	uncultured_Bacteroidetes	ASV664	yes
Bacteroidota	Bacteroidia	Chitinophagales	Saprospiraceae	uncultured		ASV2194	yes
Bacteroidota	Bacteroidia	Chitinophagales	Saprospiraceae	uncultured		ASV5140	yes
Bacteroidota	Bacteroidia	Chitinophagales	uncultured	uncultured	uncultured_bacterium	ASV1848	yes
Bacteroidota	Bacteroidia	Chitinophagales	Saprospiraceae	uncultured	uncultured_Sphingobacterium	ASV4444	yes
Bacteroidota	Bacteroidia	Chitinophagales	uncultured	uncultured	uncultured_Bacteroidetes	ASV3897	yes
Bacteroidota	Bacteroidia	Chitinophagales	Saprospiraceae	uncultured		ASV56	yes
Bacteroidota	Bacteroidia	Chitinophagales	uncultured	uncultured	uncultured_Bacteroidetes	ASV654	yes
Bacteroidota	Bacteroidia	Chitinophagales	uncultured	uncultured	uncultured_Bacteroidetes	ASV4361	yes
Bacteroidota	Bacteroidia	Chitinophagales	Saprospiraceae	uncultured		ASV347	yes
Bacteroidota	Bacteroidia	Chitinophagales	Saprospiraceae	uncultured		ASV3029	yes
Bacteroidota	Bacteroidia	Chitinophagales	uncultured	uncultured	uncultured_organism	ASV486	yes
Bacteroidota	Bacteroidia	Chitinophagales	uncultured	uncultured	uncultured_Bacteroidetes	ASV700	yes
Bacteroidota	Bacteroidia	Chitinophagales	Saprospiraceae	uncultured	uncultured_marine	ASV4568	yes
Bacteroidota	Bacteroidia	Chitinophagales	Saprospiraceae	uncultured		ASV606	yes
Bacteroidota	Bacteroidia	Chitinophagales	Saprospiraceae	uncultured		ASV1790	yes
Bacteroidota	Bacteroidia	Chitinophagales	uncultured	uncultured	uncultured_bacterium	ASV5049	yes
Bacteroidota	Bacteroidia	Chitinophagales	Saprospiraceae	uncultured		ASV27	yes
Bacteroidota	Bacteroidia	Chitinophagales	uncultured	uncultured		ASV2396	yes
Bacteroidota	Bacteroidia	Chitinophagales	Saprospiraceae	uncultured	uncultured_Bacteroidetes	ASV520	yes
Bacteroidota	Bacteroidia	Chitinophagales	Saprospiraceae	uncultured	uncultured_Lewinella	ASV2549	yes
Bacteroidota	Bacteroidia	Chitinophagales	Saprospiraceae	uncultured	uncultured_organism	ASV438	yes
Bacteroidota	Bacteroidia	Chitinophagales	uncultured	uncultured	uncultured_Bacteroidetes	ASV2821	yes
Bacteroidota	Bacteroidia	Chitinophagales	Saprospiraceae	uncultured		ASV1609	yes
Bacteroidota	Bacteroidia	Chitinophagales	uncultured	uncultured	uncultured_organism	ASV373	yes
Bacteroidota	Bacteroidia	Chitinophagales	uncultured	uncultured	uncultured_bacterium	ASV810	yes
Bacteroidota	Bacteroidia	Chitinophagales	Saprospiraceae	uncultured		ASV4903	yes
Bacteroidota	Bacteroidia	Chitinophagales	uncultured	uncultured	uncultured_bacterium	ASV2586	yes
Bacteroidota	Bacteroidia	Chitinophagales	uncultured	uncultured	uncultured_Saprospiraceae	ASV1894	yes
Bacteroidota	Bacteroidia	Chitinophagales	uncultured	uncultured	uncultured_Bacteroidetes	ASV3641	yes
Bacteroidota	Bacteroidia	Chitinophagales	Saprospiraceae	uncultured	uncultured_bacterium	ASV4468	yes
Bacteroidota	Bacteroidia	Chitinophagales	Saprospiraceae	uncultured		ASV1333	yes
Bacteroidota	Bacteroidia	Chitinophagales	Saprospiraceae	uncultured		ASV4990	yes
Bacteroidota	Bacteroidia	Chitinophagales	Saprospiraceae	uncultured	uncultured_Bacteroidetes	ASV3097	yes
Bacteroidota	Bacteroidia	Chitinophagales	uncultured	uncultured	uncultured_Sphingobacteriales	ASV4591	yes
Bacteroidota	Bacteroidia	Chitinophagales	Saprospiraceae	uncultured	uncultured_bacterium	ASV1344	yes
Bacteroidota	Bacteroidia	Chitinophagales	uncultured	uncultured	uncultured_organism	ASV868	yes
Bacteroidota	Bacteroidia	Chitinophagales	uncultured	uncultured	uncultured_Sphingobacteriales	ASV3526	yes
Bacteroidota	Bacteroidia	Chitinophagales	uncultured	uncultured	uncultured_bacterium	ASV5074	yes
Bacteroidota	Bacteroidia	Chitinophagales	uncultured	uncultured	uncultured_Bacteroidetes	ASV2930	yes
Bacteroidota	Bacteroidia	Chitinophagales	Saprospiraceae	uncultured	uncultured_bacterium	ASV5143	yes
Bacteroidota	Bacteroidia	Chitinophagales	uncultured	uncultured		ASV680	yes
Bacteroidota	Bacteroidia	Chitinophagales	Saprospiraceae	uncultured	uncultured_bacterium	ASV608	yes
Bacteroidota	Bacteroidia	Chitinophagales	uncultured	uncultured		ASV5383	yes
Bacteroidota	Bacteroidia	Chitinophagales	Saprospiraceae	uncultured		ASV2648	yes
Bacteroidota	Bacteroidia	Chitinophagales	uncultured	uncultured	uncultured_Sphingobacteriales	ASV3819	yes
Bacteroidota	Bacteroidia	Chitinophagales	uncultured	uncultured		ASV5125	yes
Bacteroidota	Bacteroidia	Chitinophagales	Saprospiraceae	uncultured	uncultured_bacterium	ASV3649	yes
Bacteroidota	Bacteroidia	Chitinophagales	Saprospiraceae	uncultured	uncultured_Bacteroidetes	ASV929	yes
Bacteroidota	Bacteroidia	Chitinophagales	uncultured	uncultured		ASV5205	yes
Bacteroidota	Bacteroidia	Chitinophagales	uncultured	uncultured	uncultured_Bacteroidetes	ASV4246	yes
Bacteroidota	Bacteroidia	Chitinophagales	Saprospiraceae	uncultured		ASV2641	yes
Bacteroidota	Bacteroidia	Chitinophagales	Saprospiraceae	uncultured		ASV2942	yes
Bacteroidota	Bacteroidia	Chitinophagales	uncultured	uncultured	uncultured_Sphingobacteriales	ASV3242	yes
Bacteroidota	Bacteroidia	Chitinophagales	Saprospiraceae	uncultured	uncultured_bacterium	ASV428	yes
Bacteroidota	Bacteroidia	Chitinophagales	uncultured	uncultured	uncultured_Bacteroidetes	ASV762	yes
Bacteroidota	Bacteroidia	Chitinophagales	Saprospiraceae	uncultured		ASV4806	yes
Bacteroidota	Bacteroidia	Chitinophagales	Saprospiraceae	uncultured		ASV1635	yes
Bacteroidota	Bacteroidia	Chitinophagales	uncultured	uncultured	uncultured_Bacteroidetes	ASV308	yes
Bacteroidota	Bacteroidia	Chitinophagales	Saprospiraceae	uncultured	uncultured_organism	ASV2350	yes
Bacteroidota	Bacteroidia	Chitinophagales	Saprospiraceae	uncultured		ASV2624	yes
Bacteroidota	Bacteroidia	Chitinophagales	uncultured	uncultured	uncultured_Bacteroidetes	ASV862	yes
Bacteroidota	Bacteroidia	Chitinophagales	Saprospiraceae	uncultured		ASV4561	yes
Bacteroidota	Bacteroidia	Chitinophagales	Saprospiraceae	uncultured		ASV376	yes
Bacteroidota	Bacteroidia	Chitinophagales	Saprospiraceae	uncultured		ASV2119	yes
Bacteroidota	Bacteroidia	Chitinophagales	uncultured	uncultured	uncultured_bacterium	ASV475	yes
Bacteroidota	Bacteroidia	Chitinophagales	Saprospiraceae	uncultured		ASV2777	yes
Bacteroidota	Bacteroidia	Chitinophagales	Saprospiraceae	uncultured		ASV1537	yes
Bacteroidota	Bacteroidia	Chitinophagales	Saprospiraceae	uncultured		ASV1875	yes
Bacteroidota	Bacteroidia	Chitinophagales	uncultured	uncultured	uncultured_Bacteroidetes	ASV639	yes
Bacteroidota	Bacteroidia	Chitinophagales	Saprospiraceae	uncultured	uncultured_Bacteroidetes	ASV4299	yes
Bacteroidota	Bacteroidia	Chitinophagales	Saprospiraceae	uncultured		ASV2152	yes
Bacteroidota	Bacteroidia	Chitinophagales	Saprospiraceae	uncultured	uncultured_Flavobacterium	ASV1338	yes
Bacteroidota	Bacteroidia	Chitinophagales	Saprospiraceae	uncultured		ASV1540	yes
Bacteroidota	Bacteroidia	Chitinophagales	Saprospiraceae	uncultured	uncultured_Bacteroidetes	ASV4007	yes
Bacteroidota	Bacteroidia	Chitinophagales	uncultured	uncultured	uncultured_Bacteroidetes	ASV5078	yes
Bacteroidota	Bacteroidia	Chitinophagales	uncultured	uncultured	uncultured_Bacteroidetes	ASV423	yes
Bacteroidota	Bacteroidia	Chitinophagales	Saprospiraceae	uncultured	uncultured_bacterium	ASV5103	yes
Bacteroidota	Bacteroidia	Chitinophagales	Saprospiraceae	uncultured	uncultured_Bacteroidetes	ASV1475	yes
Bacteroidota	Bacteroidia	Chitinophagales	Saprospiraceae	uncultured		ASV2268	yes
Bacteroidota	Bacteroidia	Chitinophagales	uncultured	uncultured	uncultured_bacterium	ASV1735	yes
Bacteroidota	Bacteroidia	Chitinophagales	Saprospiraceae	uncultured		ASV859	yes
Bacteroidota	Bacteroidia	Chitinophagales	uncultured	uncultured	uncultured_bacterium	ASV329	yes
Bacteroidota	Bacteroidia	Chitinophagales	uncultured	uncultured	uncultured_Bacteroidetes	ASV4420	yes
Bacteroidota	Bacteroidia	Chitinophagales	Saprospiraceae	uncultured		ASV205	yes
Bacteroidota	Bacteroidia	Chitinophagales	uncultured	uncultured		ASV1036	yes
Bacteroidota	Bacteroidia	Chitinophagales	uncultured	uncultured	uncultured_Bacteroidetes	ASV588	yes
Bacteroidota	Bacteroidia	Chitinophagales	uncultured	uncultured	uncultured_Sphingobacteriales	ASV3416	yes
Bacteroidota	Bacteroidia	Chitinophagales	Saprospiraceae	uncultured	uncultured_Bacteroidetes	ASV3903	yes
Bacteroidota	Bacteroidia	Chitinophagales	Saprospiraceae	uncultured		ASV975	yes
Bacteroidota	Bacteroidia	Chitinophagales	uncultured	uncultured	uncultured_bacterium	ASV1361	yes
Bacteroidota	Bacteroidia	Chitinophagales	uncultured	uncultured	uncultured_organism	ASV584	yes
Bacteroidota	Bacteroidia	Chitinophagales	uncultured	uncultured	uncultured_Bacteroidetes	ASV1065	yes
Bacteroidota	Bacteroidia	Chitinophagales	uncultured	uncultured	uncultured_Bacteroidetes	ASV161	yes
Bacteroidota	Bacteroidia	Chitinophagales	uncultured	uncultured	uncultured_Bacteroidetes	ASV960	yes
Bacteroidota	Bacteroidia	Chitinophagales	uncultured	uncultured	uncultured_Bacteroidetes	ASV2036	yes
Bacteroidota	Bacteroidia	Chitinophagales	Saprospiraceae	uncultured	uncultured_Bacteroidetes	ASV1267	yes
Bacteroidota	Bacteroidia	Chitinophagales	uncultured	uncultured	uncultured_bacterium	ASV904	yes
Bacteroidota	Bacteroidia	Chitinophagales	uncultured	uncultured	uncultured_Bacteroidetes	ASV3257	yes
Bacteroidota	Bacteroidia	Chitinophagales	Saprospiraceae	uncultured		ASV4792	yes
Bacteroidota	Bacteroidia	Chitinophagales	Saprospiraceae	uncultured		ASV3806	yes
Bacteroidota	Bacteroidia	Chitinophagales	uncultured	uncultured	uncultured_Bacteroidetes	ASV4957	yes
Bacteroidota	Bacteroidia	Chitinophagales	uncultured	uncultured	uncultured_bacterium	ASV962	yes
Bacteroidota	Bacteroidia	Chitinophagales	Saprospiraceae	uncultured		ASV1071	yes
Bacteroidota	Bacteroidia	Chitinophagales	Saprospiraceae	uncultured	uncultured_Bacteroidetes	ASV669	yes
Bacteroidota	Bacteroidia	Chitinophagales	uncultured	uncultured	uncultured_Bacteroidetes	ASV2353	yes
Bacteroidota	Bacteroidia	Chitinophagales	uncultured	uncultured	uncultured_Sphingobacteriales	ASV1575	yes
Bacteroidota	Bacteroidia	Chitinophagales	uncultured	uncultured	uncultured_Bacteroidetes	ASV2830	yes
Bacteroidota	Bacteroidia	Chitinophagales	uncultured	uncultured	uncultured_Bacteroidetes	ASV3909	yes
Bacteroidota	Bacteroidia	Chitinophagales	Saprospiraceae	uncultured		ASV4260	yes
Bacteroidota	Bacteroidia	Chitinophagales	uncultured	uncultured		ASV278	yes
Bacteroidota	Bacteroidia	Chitinophagales	Saprospiraceae	uncultured		ASV3841	yes
Bacteroidota	Bacteroidia	Chitinophagales	uncultured	uncultured	uncultured_Bacteroidetes	ASV2316	yes
Bacteroidota	Bacteroidia	Chitinophagales	uncultured	uncultured	uncultured_Bacteroidetes	ASV4171	yes
Bacteroidota	Bacteroidia	Chitinophagales	uncultured	uncultured	uncultured_Bacteroidetes	ASV715	yes
Bacteroidota	Bacteroidia	Chitinophagales	uncultured	uncultured	uncultured_Bacteroidetes	ASV3890	yes
Bacteroidota	Bacteroidia	Chitinophagales	Saprospiraceae	uncultured		ASV547	yes
Bacteroidota	Bacteroidia	Chitinophagales	uncultured	uncultured	uncultured_bacterium	ASV1934	yes
Bacteroidota	Bacteroidia	Chitinophagales	Saprospiraceae	uncultured		ASV2011	yes
Bacteroidota	Bacteroidia	Chitinophagales	uncultured	uncultured	uncultured_Bacteroidetes	ASV3561	yes
Bacteroidota	Bacteroidia	Chitinophagales	uncultured	uncultured		ASV1855	yes
Bacteroidota	Bacteroidia	Chitinophagales	Saprospiraceae	uncultured	uncultured_bacterium	ASV28	yes
Bacteroidota	Bacteroidia	Chitinophagales	Saprospiraceae	uncultured		ASV2110	yes
Bacteroidota	Bacteroidia	Chitinophagales	uncultured	uncultured	uncultured_Bacteroidetes	ASV2568	yes
Bacteroidota	Bacteroidia	Chitinophagales	Saprospiraceae	uncultured	uncultured_Bacteroidetes	ASV2669	yes
Bacteroidota	Bacteroidia	Chitinophagales	Saprospiraceae	uncultured	uncultured_bacterium	ASV5032	yes
Bacteroidota	Bacteroidia	Chitinophagales	Saprospiraceae	uncultured	uncultured_bacterium	ASV5281	yes
Bacteroidota	Bacteroidia	Chitinophagales	uncultured	uncultured		ASV2490	yes
Bacteroidota	Bacteroidia	Chitinophagales	uncultured	uncultured	uncultured_Bacteroidetes	ASV2542	yes
Bacteroidota	Bacteroidia	Chitinophagales	Saprospiraceae	uncultured	uncultured_Bacteroidetes	ASV313	yes
Bacteroidota	Bacteroidia	Chitinophagales	Saprospiraceae	uncultured		ASV532	yes
Bacteroidota	Bacteroidia	Chitinophagales	Saprospiraceae	uncultured		ASV2980	yes
Bacteroidota	Bacteroidia	Chitinophagales	Saprospiraceae	uncultured	uncultured_bacterium	ASV922	yes
Bacteroidota	Bacteroidia	Chitinophagales	Saprospiraceae	uncultured		ASV3690	yes
Bacteroidota	Bacteroidia	Chitinophagales	uncultured	uncultured	uncultured_bacterium	ASV4141	yes
Bacteroidota	Bacteroidia	Cytophagales	Cyclobacteriaceae	Fulvivirga	Fulvivirga_lutimaris	ASV296
Bacteroidota	Bacteroidia	Cytophagales	Cyclobacteriaceae	Fulvivirga	uncultured_bacterium	ASV1032
Bacteroidota	Bacteroidia	Cytophagales	Cyclobacteriaceae	Fulvivirga		ASV2504
Bacteroidota	Bacteroidia	Cytophagales	Cyclobacteriaceae	Fulvivirga	uncultured_bacterium	ASV5309
Bacteroidota	Bacteroidia	Cytophagales	Cyclobacteriaceae	Fulvivirga		ASV2356
Bacteroidota	Bacteroidia	Cytophagales	Cyclobacteriaceae	Fulvivirga	Sphingobacteriales_bacterium	ASV4208
Bacteroidota	Bacteroidia	Cytophagales	Cyclobacteriaceae	Fulvivirga	Marivirga_tractuosa	ASV684
Bacteroidota	Bacteroidia	Cytophagales	Cyclobacteriaceae	Fulvivirga		ASV1572
Bacteroidota	Bacteroidia	Cytophagales	Cyclobacteriaceae	Fulvivirga	uncultured_bacterium	ASV1998
Bacteroidota	Bacteroidia	Cytophagales	Cyclobacteriaceae	Fulvivirga	Fulvivirga_sp.	ASV1966
Bacteroidota	Bacteroidia	Cytophagales	Cyclobacteriaceae	Fulvivirga	uncultured_Bacteroidetes	ASV3312
Bacteroidota	Bacteroidia	Cytophagales	Cyclobacteriaceae	Fulvivirga		ASV2990
Bacteroidota	Bacteroidia	Cytophagales	Cyclobacteriaceae	Fulvivirga	uncultured_bacterium	ASV4902
Bacteroidota	Bacteroidia	Flavobacteriales	Flavobacteriaceae	Gilvibacter	Gilvibacter_sediminis	ASV4508	yes
Bacteroidota	Bacteroidia	Flavobacteriales	Flavobacteriaceae	Gilvibacter	Gilvibacter_sediminis	ASV354	yes
Bacteroidota	Bacteroidia	Flavobacteriales	Flavobacteriaceae	Gilvibacter	uncultured_Flavobacteriaceae	ASV4148	yes
Bacteroidota	Kapabacteria	Kapabacteriales	Kapabacteriales	Kapabacteriales	uncultured_bacterium	ASV1421	yes
Bacteroidota	Kapabacteria	Kapabacteriales	Kapabacteriales	Kapabacteriales	uncultured_bacterium	ASV2008	yes
Bacteroidota	Kapabacteria	Kapabacteriales	Kapabacteriales	Kapabacteriales	uncultured_bacterium	ASV82	yes
Bacteroidota	Kapabacteria	Kapabacteriales	Kapabacteriales	Kapabacteriales	uncultured_Chlorobiales	ASV2886	yes
Bacteroidota	Kapabacteria	Kapabacteriales	Kapabacteriales	Kapabacteriales	uncultured_bacterium	ASV3096	yes
Bacteroidota	Kapabacteria	Kapabacteriales	Kapabacteriales	Kapabacteriales		ASV1717	yes
Bacteroidota	Kapabacteria	Kapabacteriales	Kapabacteriales	Kapabacteriales		ASV2046	yes
Bdellovibrionota	Bdellovibrionia	Bacteriovoracales	Bacteriovoracaceae	Peredibacter		ASV1556	yes
Bdellovibrionota	Bdellovibrionia	Bacteriovoracales	Bacteriovoracaceae	Peredibacter		ASV604	yes
Bdellovibrionota	Bdellovibrionia	Bacteriovoracales	Bacteriovoracaceae	Peredibacter	uncultured_delta	ASV567	yes
Bdellovibrionota	Bdellovibrionia	Bacteriovoracales	Bacteriovoracaceae	Peredibacter	uncultured_bacterium	ASV2069	yes
Bdellovibrionota	Bdellovibrionia	Bacteriovoracales	Bacteriovoracaceae	Peredibacter	uncultured_bacterium	ASV3321	yes
Bdellovibrionota	Bdellovibrionia	Bacteriovoracales	Bacteriovoracaceae	Peredibacter		ASV2038	yes
Bdellovibrionota	Bdellovibrionia	Bacteriovoracales	Bacteriovoracaceae	Peredibacter		ASV2440	yes
Bdellovibrionota	Bdellovibrionia	Bacteriovoracales	Bacteriovoracaceae	Peredibacter	uncultured_Peredibacter	ASV3576	yes
Bdellovibrionota	Bdellovibrionia	Bacteriovoracales	Bacteriovoracaceae	Peredibacter	uncultured_bacterium	ASV5193	yes
Bdellovibrionota	Bdellovibrionia	Bacteriovoracales	Bacteriovoracaceae	Peredibacter		ASV5326	yes
Bdellovibrionota	Bdellovibrionia	Bacteriovoracales	Bacteriovoracaceae	Peredibacter	uncultured_organism	ASV2742	yes
Bdellovibrionota	Bdellovibrionia	Bacteriovoracales	Bacteriovoracaceae	Peredibacter	uncultured_delta	ASV569	yes
Bdellovibrionota	Bdellovibrionia	Bacteriovoracales	Bacteriovoracaceae	Peredibacter	uncultured_bacterium	ASV4336	yes
Bdellovibrionota	Bdellovibrionia	Bacteriovoracales	Bacteriovoracaceae	Peredibacter	uncultured_Bacteriovorax	ASV1630	yes
Bdellovibrionota	Bdellovibrionia	Bacteriovoracales	Bacteriovoracaceae	Peredibacter	uncultured_Bacteriovorax	ASV3936	yes
Bdellovibrionota	Bdellovibrionia	Bacteriovoracales	Bacteriovoracaceae	Peredibacter	uncultured_marine	ASV4003	yes
Bdellovibrionota	Bdellovibrionia	Bacteriovoracales	Bacteriovoracaceae	Peredibacter		ASV2037	yes
Bdellovibrionota	Bdellovibrionia	Bacteriovoracales	Bacteriovoracaceae	Peredibacter		ASV1180	yes
Bdellovibrionota	Bdellovibrionia	Bacteriovoracales	Bacteriovoracaceae	Peredibacter		ASV4253	yes
Bdellovibrionota	Bdellovibrionia	Bacteriovoracales	Bacteriovoracaceae	Peredibacter	uncultured_bacterium	ASV4815	yes
Bdellovibrionota	Bdellovibrionia	Bacteriovoracales	Bacteriovoracaceae	Peredibacter	uncultured_Bacteriovorax	ASV364	yes
Bdellovibrionota	Bdellovibrionia	Bacteriovoracales	Bacteriovoracaceae	Peredibacter		ASV167	yes
Bdellovibrionota	Bdellovibrionia	Bacteriovoracales	Bacteriovoracaceae	Peredibacter		ASV3837	yes
Bdellovibrionota	Bdellovibrionia	Bacteriovoracales	Bacteriovoracaceae	Peredibacter		ASV2321	yes
Bdellovibrionota	Bdellovibrionia	Bacteriovoracales	Bacteriovoracaceae	Peredibacter		ASV641	yes
Bdellovibrionota	Bdellovibrionia	Bacteriovoracales	Bacteriovoracaceae	Peredibacter		ASV1259	yes
Bdellovibrionota	Bdellovibrionia	Bacteriovoracales	Bacteriovoracaceae	Peredibacter		ASV886	yes
Bdellovibrionota	Bdellovibrionia	Bacteriovoracales	Bacteriovoracaceae	Peredibacter		ASV4389	yes
Bdellovibrionota	Bdellovibrionia	Bacteriovoracales	Bacteriovoracaceae	Peredibacter	uncultured_Bacteriovorax	ASV4570	yes
Bdellovibrionota	Bdellovibrionia	Bacteriovoracales	Bacteriovoracaceae	Peredibacter	uncultured_bacterium	ASV2374	yes
Bdellovibrionota	Bdellovibrionia	Bacteriovoracales	Bacteriovoracaceae	Peredibacter	uncultured_Bacteriovorax	ASV2154	yes
Bdellovibrionota	Bdellovibrionia	Bacteriovoracales	Bacteriovoracaceae	Peredibacter	uncultured_Peredibacter	ASV4693	yes
Bdellovibrionota	Bdellovibrionia	Bacteriovoracales	Bacteriovoracaceae	Peredibacter	uncultured_organism	ASV147	yes
Bdellovibrionota	Bdellovibrionia	Bacteriovoracales	Bacteriovoracaceae	Peredibacter		ASV155	yes
Bdellovibrionota	Bdellovibrionia	Bacteriovoracales	Bacteriovoracaceae	Peredibacter	uncultured_bacterium	ASV755	yes
Bdellovibrionota	Bdellovibrionia	Bacteriovoracales	Bacteriovoracaceae	Peredibacter	uncultured_organism	ASV1929	yes
Bdellovibrionota	Bdellovibrionia	Bacteriovoracales	Bacteriovoracaceae	Peredibacter	uncultured_Bacteriovorax	ASV541	yes
Bdellovibrionota	Bdellovibrionia	Bacteriovoracales	Bacteriovoracaceae	Peredibacter		ASV3729	yes
Bdellovibrionota	Bdellovibrionia	Bacteriovoracales	Bacteriovoracaceae	Peredibacter	uncultured_Bacteriovorax	ASV4366	yes
Bdellovibrionota	Bdellovibrionia	Bacteriovoracales	Bacteriovoracaceae	Peredibacter	uncultured_bacterium	ASV2971	yes
Bdellovibrionota	Bdellovibrionia	Bacteriovoracales	Bacteriovoracaceae	Peredibacter		ASV2232	yes
Bdellovibrionota	Bdellovibrionia	Bacteriovoracales	Bacteriovoracaceae	Peredibacter		ASV2618	yes
Bdellovibrionota	Bdellovibrionia	Bacteriovoracales	Bacteriovoracaceae	Peredibacter	uncultured_bacterium	ASV1974	yes
Bdellovibrionota	Bdellovibrionia	Bacteriovoracales	Bacteriovoracaceae	Peredibacter	uncultured_Peredibacter	ASV3510	yes
Bdellovibrionota	Bdellovibrionia	Bacteriovoracales	Bacteriovoracaceae	Peredibacter	uncultured_bacterium	ASV3610	yes
Bdellovibrionota	Bdellovibrionia	Bacteriovoracales	Bacteriovoracaceae	Peredibacter	uncultured_marine	ASV4601	yes
Bdellovibrionota	Bdellovibrionia	Bacteriovoracales	Bacteriovoracaceae	Peredibacter	uncultured_delta	ASV1644	yes
Bdellovibrionota	Bdellovibrionia	Bacteriovoracales	Bacteriovoracaceae	Peredibacter		ASV2707	yes
Bdellovibrionota	Bdellovibrionia	Bacteriovoracales	Bacteriovoracaceae	Peredibacter		ASV4649	yes
Bdellovibrionota	Bdellovibrionia	Bacteriovoracales	Bacteriovoracaceae	Peredibacter		ASV277	yes
Bdellovibrionota	Bdellovibrionia	Bacteriovoracales	Bacteriovoracaceae	Peredibacter		ASV4463	yes
Bdellovibrionota	Bdellovibrionia	Bacteriovoracales	Bacteriovoracaceae	Peredibacter		ASV5146	yes
Bdellovibrionota	Bdellovibrionia	Bacteriovoracales	Bacteriovoracaceae	Peredibacter		ASV2033	yes
Bdellovibrionota	Bdellovibrionia	Bacteriovoracales	Bacteriovoracaceae	Peredibacter	uncultured_bacterium	ASV683	yes
Bdellovibrionota	Bdellovibrionia	Bacteriovoracales	Bacteriovoracaceae	Peredibacter		ASV2361	yes
Bdellovibrionota	Bdellovibrionia	Bacteriovoracales	Bacteriovoracaceae	Peredibacter	uncultured_marine	ASV3869	yes
Bdellovibrionota	Bdellovibrionia	Bacteriovoracales	Bacteriovoracaceae	Peredibacter		ASV5260	yes
Bdellovibrionota	Bdellovibrionia	Bacteriovoracales	Bacteriovoracaceae	Peredibacter		ASV1576	yes
Bdellovibrionota	Oligoflexia	Oligoflexales	Oligoflexales	Pseudobacteriovorax	uncultured_delta	ASV92	yes
Bdellovibrionota	Oligoflexia	Oligoflexales	Oligoflexales	Pseudobacteriovorax	uncultured_bacterium	ASV1823	yes
Bdellovibrionota	Oligoflexia	Oligoflexales	Oligoflexales	Pseudobacteriovorax	Pseudobacteriovorax_antillogorgiicola	ASV2001	yes
Bdellovibrionota	Oligoflexia	Oligoflexales	Oligoflexales	Pseudobacteriovorax	uncultured_bacterium	ASV1989	yes
Bdellovibrionota	Oligoflexia	Oligoflexales	Oligoflexales	Pseudobacteriovorax	uncultured_bacterium	ASV2763	yes
Bdellovibrionota	Oligoflexia	Oligoflexales	Oligoflexales	Pseudobacteriovorax	uncultured_bacterium	ASV3883	yes
Bdellovibrionota	Oligoflexia	Oligoflexales	Oligoflexales	Pseudobacteriovorax	uncultured_bacterium	ASV3224	yes
Bdellovibrionota	Oligoflexia	Oligoflexales	Oligoflexales	Pseudobacteriovorax	uncultured_delta	ASV4950	yes
Bdellovibrionota	Oligoflexia	Oligoflexales	Oligoflexales	Pseudobacteriovorax	uncultured_delta	ASV3057	yes
Bdellovibrionota	Oligoflexia	Oligoflexales	uncultured	uncultured	uncultured_proteobacterium	ASV1018	yes
Bdellovibrionota	Oligoflexia	Oligoflexales	uncultured	uncultured	uncultured_proteobacterium	ASV2627	yes
Bdellovibrionota	Oligoflexia	Oligoflexales	uncultured	uncultured		ASV1323	yes
Bdellovibrionota	Oligoflexia	Oligoflexales	uncultured	uncultured	uncultured_bacterium	ASV1792	yes
Bdellovibrionota	Oligoflexia	Oligoflexales	uncultured	uncultured	uncultured_bacterium	ASV4573	yes
Bdellovibrionota	Oligoflexia	Oligoflexales	uncultured	uncultured		ASV749	yes
Bdellovibrionota	Oligoflexia	Oligoflexales	uncultured	uncultured	uncultured_bacterium	ASV4471	yes
Bdellovibrionota	Oligoflexia	Oligoflexales	uncultured	uncultured	uncultured_bacterium	ASV3022	yes
Bdellovibrionota	Oligoflexia	Oligoflexales	uncultured	uncultured		ASV3784	yes
Bdellovibrionota	Oligoflexia	Oligoflexales	uncultured	uncultured	uncultured_bacterium	ASV3374	yes
Bdellovibrionota	Oligoflexia	Oligoflexales	uncultured	uncultured		ASV3818	yes
Bdellovibrionota	Oligoflexia	Oligoflexales	uncultured	uncultured	uncultured_bacterium	ASV965	yes
Bdellovibrionota	Oligoflexia	Oligoflexales	uncultured	uncultured	uncultured_delta	ASV4943	yes
Bdellovibrionota	Oligoflexia	Oligoflexales	uncultured	uncultured	uncultured_bacterium	ASV2878	yes
Bdellovibrionota	Oligoflexia	Oligoflexales	uncultured	uncultured	uncultured_bacterium	ASV879	yes
Bdellovibrionota	Oligoflexia	Oligoflexales	uncultured	uncultured	uncultured_organism	ASV2383	yes
Bdellovibrionota	Oligoflexia	Oligoflexales	uncultured	uncultured		ASV2016	yes
Bdellovibrionota	Oligoflexia	Oligoflexales	uncultured	uncultured		ASV3216	yes
Bdellovibrionota	Oligoflexia	Oligoflexales	uncultured	uncultured	uncultured_bacterium	ASV4218	yes
Bdellovibrionota	Oligoflexia	Oligoflexales	uncultured	uncultured		ASV116	yes
Bdellovibrionota	Oligoflexia	Oligoflexales	uncultured	uncultured	uncultured_bacterium	ASV2721	yes
Bdellovibrionota	Oligoflexia	Oligoflexales	uncultured	uncultured	metagenome	ASV1588	yes
Bdellovibrionota	Oligoflexia	Oligoflexales	uncultured	uncultured		ASV1387	yes
Bdellovibrionota	Oligoflexia	Oligoflexales	uncultured	uncultured	uncultured_bacterium	ASV1965	yes
Bdellovibrionota	Oligoflexia	Oligoflexales	uncultured	uncultured	uncultured_bacterium	ASV2263	yes
Bdellovibrionota	Oligoflexia	Oligoflexales	uncultured	uncultured	uncultured_bacterium	ASV3231	yes
Bdellovibrionota	Oligoflexia	Oligoflexales	uncultured	uncultured	uncultured_proteobacterium	ASV2267	yes
Bdellovibrionota	Oligoflexia	Oligoflexales	uncultured	uncultured	uncultured_bacterium	ASV5200	yes
Bdellovibrionota	Oligoflexia	Oligoflexales	uncultured	uncultured		ASV1099	yes
Bdellovibrionota	Oligoflexia	Oligoflexales	uncultured	uncultured		ASV4190	yes
Bdellovibrionota	Oligoflexia	Oligoflexales	uncultured	uncultured	uncultured_bacterium	ASV1865	yes
Bdellovibrionota	Oligoflexia	Oligoflexales	uncultured	uncultured	uncultured_bacterium	ASV4790	yes
Bdellovibrionota	Oligoflexia	Oligoflexales	uncultured	uncultured	uncultured_bacterium	ASV3573	yes
Bdellovibrionota	Oligoflexia	Oligoflexales	uncultured	uncultured		ASV3872	yes
Bdellovibrionota	Oligoflexia	Oligoflexales	uncultured	uncultured	uncultured_bacterium	ASV1589	yes
Bdellovibrionota	Oligoflexia	Oligoflexales	uncultured	uncultured		ASV106	yes
Bdellovibrionota	Oligoflexia	Oligoflexales	uncultured	uncultured	uncultured_delta	ASV2423	yes
Bdellovibrionota	Oligoflexia	Oligoflexales	uncultured	uncultured	uncultured_bacterium	ASV4034	yes
Bdellovibrionota	Oligoflexia	Oligoflexales	uncultured	uncultured	uncultured_organism	ASV2157	yes
Bdellovibrionota	Oligoflexia	Oligoflexales	uncultured	uncultured		ASV2867	yes
Bdellovibrionota	Oligoflexia	Oligoflexales	uncultured	uncultured	uncultured_bacterium	ASV5043	yes
Bdellovibrionota	Oligoflexia	Oligoflexales	uncultured	uncultured	uncultured_bacterium	ASV230	yes
Bdellovibrionota	Oligoflexia	Oligoflexales	uncultured	uncultured	uncultured_bacterium	ASV4756	yes
Bdellovibrionota	Oligoflexia	Oligoflexales	uncultured	uncultured	uncultured_bacterium	ASV1806	yes
Bdellovibrionota	Oligoflexia	Oligoflexales	uncultured	uncultured	uncultured_proteobacterium	ASV4938	yes
Bdellovibrionota	Oligoflexia	Oligoflexales	uncultured	uncultured	uncultured_bacterium	ASV4691	yes
Bdellovibrionota	Oligoflexia	Oligoflexales	uncultured	uncultured	uncultured_bacterium	ASV4654	yes
Bdellovibrionota	Oligoflexia	Oligoflexales	uncultured	uncultured	uncultured_bacterium	ASV4917	yes
Bdellovibrionota	Oligoflexia	Oligoflexales	uncultured	uncultured	uncultured_bacterium	ASV3438	yes
Bdellovibrionota	Oligoflexia	Oligoflexales	uncultured	uncultured	uncultured_bacterium	ASV1162	yes
Bdellovibrionota	Oligoflexia	Oligoflexales	uncultured	uncultured	uncultured_bacterium	ASV1285	yes
Bdellovibrionota	Oligoflexia	Oligoflexales	uncultured	uncultured		ASV4056	yes
Bdellovibrionota	Oligoflexia	Oligoflexales	uncultured	uncultured		ASV2934	yes
Chloroflexi	Dehalococcoidia	SAR202_clade	SAR202_clade	SAR202_clade		ASV625
Chloroflexi	Dehalococcoidia	SAR202_clade	SAR202_clade	SAR202_clade		ASV4763
Chloroflexi	Dehalococcoidia	SAR202_clade	SAR202_clade	SAR202_clade	uncultured_bacterium	ASV57
Chloroflexi	Dehalococcoidia	SAR202_clade	SAR202_clade	SAR202_clade	hydrothermal_vent	ASV209
Chloroflexi	Dehalococcoidia	SAR202_clade	SAR202_clade	SAR202_clade	uncultured_bacterium	ASV1312
Chloroflexi	Dehalococcoidia	SAR202_clade	SAR202_clade	SAR202_clade	hydrothermal_vent	ASV4501
Chloroflexi	Dehalococcoidia	SAR202_clade	SAR202_clade	SAR202_clade	uncultured_bacterium	ASV3817
Chloroflexi	Dehalococcoidia	SAR202_clade	SAR202_clade	SAR202_clade	uncultured_bacterium	ASV5075
Chloroflexi	Dehalococcoidia	SAR202_clade	SAR202_clade	SAR202_clade	uncultured_bacterium	ASV87
Chloroflexi	Dehalococcoidia	SAR202_clade	SAR202_clade	SAR202_clade	hydrothermal_vent	ASV4969
Chloroflexi	Dehalococcoidia	SAR202_clade	SAR202_clade	SAR202_clade	uncultured_bacterium	ASV159
Chloroflexi	Dehalococcoidia	SAR202_clade	SAR202_clade	SAR202_clade	uncultured_bacterium	ASV3824
Desulfobacterota	Desulfuromonadia	Bradymonadales	Bradymonadales	Bradymonadales		ASV2502	yes	yes
Desulfobacterota	Desulfuromonadia	Bradymonadales	Bradymonadales	Bradymonadales		ASV5166	yes	yes
Desulfobacterota	Desulfuromonadia	Bradymonadales	Bradymonadales	Bradymonadales	uncultured_bacterium	ASV1804	yes	yes
Desulfobacterota	Desulfuromonadia	Bradymonadales	Bradymonadales	Bradymonadales	uncultured_bacterium	ASV3814	yes	yes
Desulfobacterota	Desulfuromonadia	Bradymonadales	Bradymonadales	Bradymonadales		ASV5058	yes	yes
Desulfobacterota	Desulfuromonadia	Bradymonadales	Bradymonadales	Bradymonadales	uncultured_marine	ASV689	yes	yes
Desulfobacterota	Desulfuromonadia	Bradymonadales	Bradymonadales	Bradymonadales	uncultured_marine	ASV1541	yes	yes
Desulfobacterota	Desulfuromonadia	Bradymonadales	Bradymonadales	Bradymonadales	uncultured_bacterium	ASV2790	yes	yes
Desulfobacterota	Desulfuromonadia	Bradymonadales	Bradymonadales	Bradymonadales	uncultured_delta	ASV4094	yes	yes
Desulfobacterota	Desulfuromonadia	Bradymonadales	Bradymonadales	Bradymonadales	uncultured_marine	ASV5378	yes	yes
Desulfobacterota	Desulfuromonadia	Bradymonadales	Bradymonadales	Bradymonadales	uncultured_delta	ASV4941	yes	yes
Desulfobacterota	Desulfuromonadia	Bradymonadales	Bradymonadales	Bradymonadales	uncultured_delta	ASV4304	yes	yes
Desulfobacterota	Desulfuromonadia	Bradymonadales	Bradymonadales	Bradymonadales	uncultured_delta	ASV3968	yes	yes
Desulfobacterota	Desulfuromonadia	Bradymonadales	Bradymonadales	Bradymonadales		ASV1770	yes	yes
Desulfobacterota	Desulfuromonadia	Bradymonadales	Bradymonadales	Bradymonadales	uncultured_organism	ASV15	yes	yes
Desulfobacterota	Desulfuromonadia	Bradymonadales	Bradymonadales	Bradymonadales	uncultured_marine	ASV1496	yes	yes
Desulfobacterota	Desulfuromonadia	Bradymonadales	Bradymonadales	Bradymonadales	uncultured_delta	ASV823	yes	yes
Desulfobacterota	Desulfuromonadia	Bradymonadales	Bradymonadales	Bradymonadales	uncultured_marine	ASV4787	yes	yes
Desulfobacterota	Desulfuromonadia	Bradymonadales	Bradymonadales	Bradymonadales	uncultured_bacterium	ASV1289	yes	yes
Desulfobacterota	Desulfuromonadia	Bradymonadales	Bradymonadales	Bradymonadales		ASV1879	yes	yes
Desulfobacterota	Desulfuromonadia	Bradymonadales	Bradymonadales	Bradymonadales	uncultured_bacterium	ASV1945	yes	yes
Desulfobacterota	Desulfuromonadia	Bradymonadales	Bradymonadales	Bradymonadales	uncultured_marine	ASV5374	yes	yes
Desulfobacterota	Desulfuromonadia	Bradymonadales	Bradymonadales	Bradymonadales	uncultured_bacterium	ASV3319	yes	yes
Fibrobacterota	Fibrobacteria	Fibrobacterales	Fibrobacteraceae	uncultured	uncultured_bacterium	ASV3854	yes	yes
Fibrobacterota	Fibrobacteria	Fibrobacterales	Fibrobacteraceae	uncultured	uncultured_organism	ASV2017	yes	yes
Fibrobacterota	Fibrobacteria	Fibrobacterales	Fibrobacteraceae	uncultured	uncultured_bacterium	ASV851	yes	yes
Fibrobacterota	Fibrobacteria	Fibrobacterales	Fibrobacteraceae	uncultured		ASV4829	yes	yes
Fibrobacterota	Fibrobacteria	Fibrobacterales	Fibrobacteraceae	uncultured	uncultured_bacterium	ASV2789	yes	yes
Fibrobacterota	Fibrobacteria	Fibrobacterales	Fibrobacteraceae	uncultured	uncultured_bacterium	ASV2114	yes	yes
Fibrobacterota	Fibrobacteria	Fibrobacterales	Fibrobacteraceae	uncultured	uncultured_Fibrobacteres	ASV2803	yes	yes
Fibrobacterota	Fibrobacteria	Fibrobacterales	Fibrobacteraceae	uncultured	uncultured_bacterium	ASV2100	yes	yes
Fibrobacterota	Fibrobacteria	Fibrobacterales	Fibrobacteraceae	uncultured	uncultured_bacterium	ASV3630	yes	yes
Fibrobacterota	Fibrobacteria	Fibrobacterales	Fibrobacteraceae	uncultured	uncultured_bacterium	ASV1895	yes	yes
Planctomycetota	Planctomycetes	Pirellulales	Pirellulaceae	Bythopirellula	uncultured_bacterium	ASV5000
Planctomycetota	Planctomycetes	Pirellulales	Pirellulaceae	Bythopirellula	uncultured_bacterium	ASV111
Planctomycetota	Planctomycetes	Pirellulales	Pirellulaceae	Bythopirellula	uncultured_bacterium	ASV3368
Planctomycetota	Planctomycetes	Pirellulales	Pirellulaceae	Bythopirellula	uncultured_bacterium	ASV2997
Planctomycetota	Planctomycetes	Pirellulales	Pirellulaceae	Bythopirellula	uncultured_bacterium	ASV537
Planctomycetota	Planctomycetes	Pirellulales	Pirellulaceae	Bythopirellula	uncultured_bacterium	ASV692
Planctomycetota	Planctomycetes	Pirellulales	Pirellulaceae	Bythopirellula	uncultured_planctomycete	ASV574
Planctomycetota	Planctomycetes	Pirellulales	Pirellulaceae	Bythopirellula	uncultured_bacterium	ASV3894
Planctomycetota	Planctomycetes	Pirellulales	Pirellulaceae	Bythopirellula	uncultured_bacterium	ASV5216
Planctomycetota	Planctomycetes	Pirellulales	Pirellulaceae	Bythopirellula	uncultured_bacterium	ASV787
Planctomycetota	Planctomycetes	Pirellulales	Pirellulaceae	Bythopirellula	uncultured_bacterium	ASV694
Planctomycetota	Planctomycetes	Pirellulales	Pirellulaceae	Bythopirellula	uncultured_bacterium	ASV4498
Planctomycetota	Planctomycetes	Pirellulales	Pirellulaceae	Bythopirellula	uncultured_bacterium	ASV3769
Planctomycetota	Planctomycetes	Pirellulales	Pirellulaceae	Bythopirellula	uncultured_bacterium	ASV4718
Planctomycetota	Planctomycetes	Pirellulales	Pirellulaceae	Bythopirellula	uncultured_bacterium	ASV3882
Planctomycetota	Planctomycetes	Pirellulales	Pirellulaceae	Pirellula		ASV4296	yes
Planctomycetota	Planctomycetes	Pirellulales	Pirellulaceae	Pirellula		ASV2689	yes
Planctomycetota	Planctomycetes	Pirellulales	Pirellulaceae	Pirellula	uncultured_organism	ASV2076	yes
Planctomycetota	Planctomycetes	Pirellulales	Pirellulaceae	Pirellula	uncultured_bacterium	ASV1916	yes
Planctomycetota	Planctomycetes	Pirellulales	Pirellulaceae	Pirellula	uncultured_Planctomycetales	ASV1926	yes
Planctomycetota	Planctomycetes	Pirellulales	Pirellulaceae	Pirellula	uncultured_planctomycete	ASV3418	yes
Planctomycetota	Planctomycetes	Pirellulales	Pirellulaceae	Pirellula		ASV1513	yes
Planctomycetota	Planctomycetes	Pirellulales	Pirellulaceae	Pirellula	uncultured_Planctomycetales	ASV4791	yes
Planctomycetota	Planctomycetes	Pirellulales	Pirellulaceae	Pirellula	planctomycete_DDSe3017	ASV5274	yes
Planctomycetota	Planctomycetes	Pirellulales	Pirellulaceae	Pirellula	uncultured_organism	ASV1959	yes
Planctomycetota	Planctomycetes	Pirellulales	Pirellulaceae	Pirellula	uncultured_planctomycete	ASV1006	yes
Planctomycetota	Planctomycetes	Pirellulales	Pirellulaceae	Pirellula		ASV1395	yes
Planctomycetota	Planctomycetes	Pirellulales	Pirellulaceae	Pirellula	uncultured_organism	ASV2395	yes
Planctomycetota	Planctomycetes	Pirellulales	Pirellulaceae	Pirellula		ASV709	yes
Planctomycetota	Planctomycetes	Planctomycetales	Gimesiaceae	Gimesia		ASV3168
Planctomycetota	Planctomycetes	Planctomycetales	Gimesiaceae	Gimesia		ASV3088
Planctomycetota	Planctomycetes	Planctomycetales	Gimesiaceae	Gimesia		ASV110
Proteobacteria	Alphaproteobacteria	Caulobacterales	Parvularculaceae	Marinicaulis	uncultured_Rhizobiales	ASV3344
Proteobacteria	Alphaproteobacteria	Caulobacterales	Parvularculaceae	Marinicaulis	uncultured_Rhizobiales	ASV2715
Proteobacteria	Alphaproteobacteria	Caulobacterales	Parvularculaceae	Marinicaulis	uncultured_bacterium	ASV5188
Proteobacteria	Alphaproteobacteria	Caulobacterales	Parvularculaceae	Marinicaulis	uncultured_bacterium	ASV1025
Proteobacteria	Alphaproteobacteria	Puniceispirillales	uncultured	uncultured	uncultured_Alphaproteobacteria	ASV4114
Proteobacteria	Alphaproteobacteria	Puniceispirillales	uncultured	uncultured	uncultured_Rhodospirillaceae	ASV3713
Proteobacteria	Alphaproteobacteria	Puniceispirillales	uncultured	uncultured		ASV2874
Proteobacteria	Alphaproteobacteria	Puniceispirillales	uncultured	uncultured		ASV4054
Proteobacteria	Alphaproteobacteria	Rhodobacterales	Rhodobacteraceae	Shimia		ASV3332		yes
Proteobacteria	Alphaproteobacteria	uncultured	uncultured	uncultured	uncultured_Rhodobacteraceae	ASV4407
Proteobacteria	Gammaproteobacteria	Alteromonadales	Alteromonadaceae	Aestuariibacter		ASV3793
Proteobacteria	Gammaproteobacteria	Alteromonadales	Alteromonadaceae	Aestuariibacter		ASV666
Proteobacteria	Gammaproteobacteria	Alteromonadales	Alteromonadaceae	Aestuariibacter		ASV3261
Proteobacteria	Gammaproteobacteria	Alteromonadales	Alteromonadaceae	Aestuariibacter	uncultured_bacterium	ASV2108
Proteobacteria	Gammaproteobacteria	Alteromonadales	Alteromonadaceae	Aestuariibacter	uncultured_bacterium	ASV3542
Proteobacteria	Gammaproteobacteria	Alteromonadales	Alteromonadaceae	Aestuariibacter	Planctobacterium_marinum	ASV2155
Proteobacteria	Gammaproteobacteria	Alteromonadales	Alteromonadaceae	Aestuariibacter	uncultured_bacterium	ASV1158
Proteobacteria	Gammaproteobacteria	Alteromonadales	Alteromonadaceae	Aestuariibacter	Aestuariibacter_sp.	ASV4686
Proteobacteria	Gammaproteobacteria	Alteromonadales	Alteromonadaceae	Aestuariibacter		ASV5269
Proteobacteria	Gammaproteobacteria	Alteromonadales	Alteromonadaceae	Aestuariibacter	uncultured_Alteromonadaceae	ASV5336
Proteobacteria	Gammaproteobacteria	Alteromonadales	Alteromonadaceae	Aestuariibacter		ASV4562
Proteobacteria	Gammaproteobacteria	Alteromonadales	Alteromonadaceae	Aestuariibacter	Aestuariibacter_sp.	ASV3389
Proteobacteria	Gammaproteobacteria	Alteromonadales	Alteromonadaceae	Aestuariibacter		ASV476
Proteobacteria	Gammaproteobacteria	Alteromonadales	Alteromonadaceae	Aestuariibacter		ASV1309
Proteobacteria	Gammaproteobacteria	Alteromonadales	Alteromonadaceae	Aestuariibacter	uncultured_bacterium	ASV5215	yes
Proteobacteria	Gammaproteobacteria	Alteromonadales	Marinobacteraceae	Marinobacter		ASV2799	yes
Proteobacteria	Gammaproteobacteria	Alteromonadales	Marinobacteraceae	Marinobacter		ASV118
Proteobacteria	Gammaproteobacteria	Alteromonadales	Shewanellaceae	Ferrimonas	Ferrimonas_futtsuensis	ASV200
Proteobacteria	Gammaproteobacteria	Alteromonadales	Shewanellaceae	Ferrimonas	Ferrimonas_balearica	ASV1280	yes
Proteobacteria	Gammaproteobacteria	BD7-8	BD7-8	BD7-8	uncultured_bacterium	ASV2770	yes
Proteobacteria	Gammaproteobacteria	BD7-8	BD7-8	BD7-8	uncultured_bacterium	ASV4231	yes
Proteobacteria	Gammaproteobacteria	BD7-8	BD7-8	BD7-8	uncultured_bacterium	ASV2371	yes
Proteobacteria	Gammaproteobacteria	BD7-8	BD7-8	BD7-8	uncultured_bacterium	ASV4038	yes
Proteobacteria	Gammaproteobacteria	BD7-8	BD7-8	BD7-8	uncultured_bacterium	ASV1160	yes
Proteobacteria	Gammaproteobacteria	BD7-8	BD7-8	BD7-8	uncultured_bacterium	ASV3486	yes
Proteobacteria	Gammaproteobacteria	BD7-8	BD7-8	BD7-8	uncultured_bacterium	ASV3179	yes
Proteobacteria	Gammaproteobacteria	BD7-8	BD7-8	BD7-8		ASV1176	yes
Proteobacteria	Gammaproteobacteria	BD7-8	BD7-8	BD7-8	uncultured_gamma	ASV3446
Proteobacteria	Gammaproteobacteria	Cellvibrionales	Cellvibrionaceae	Aestuariicella	uncultured_bacterium	ASV1596
Proteobacteria	Gammaproteobacteria	Cellvibrionales	Cellvibrionaceae	Aestuariicella		ASV2622	yes	yes
Proteobacteria	Gammaproteobacteria	Cellvibrionales	Porticoccaceae	Porticoccus	uncultured_bacterium	ASV1871	yes	yes
Proteobacteria	Gammaproteobacteria	Cellvibrionales	Porticoccaceae	Porticoccus	uncultured_bacterium	ASV4887	yes	yes
Proteobacteria	Gammaproteobacteria	Cellvibrionales	Porticoccaceae	Porticoccus	uncultured_bacterium	ASV2093	yes	yes
Proteobacteria	Gammaproteobacteria	Cellvibrionales	Porticoccaceae	Porticoccus	uncultured_bacterium	ASV2372	yes	yes
Proteobacteria	Gammaproteobacteria	Cellvibrionales	Porticoccaceae	Porticoccus	uncultured_bacterium	ASV4972	yes	yes
Proteobacteria	Gammaproteobacteria	Cellvibrionales	Porticoccaceae	Porticoccus		ASV4495	yes	yes
Proteobacteria	Gammaproteobacteria	Cellvibrionales	Cellvibrionaceae	Simiduia	Simiduia_agarivorans	ASV3657
Proteobacteria	Gammaproteobacteria	Diplorickettsiales	Diplorickettsiaceae	Aquicella	uncultured_gamma	ASV3033
Proteobacteria	Gammaproteobacteria	Diplorickettsiales	Diplorickettsiaceae	Aquicella	uncultured_gamma	ASV276
Proteobacteria	Gammaproteobacteria	Diplorickettsiales	Diplorickettsiaceae	Aquicella	uncultured_bacterium	ASV2671
Proteobacteria	Gammaproteobacteria	Oceanospirillales	Kangiellaceae	Aliikangiella	Aliikangiella_marina	ASV3786
Proteobacteria	Gammaproteobacteria	Oceanospirillales	Kangiellaceae	Aliikangiella		ASV2693
Proteobacteria	Gammaproteobacteria	Oceanospirillales	Kangiellaceae	Aliikangiella		ASV4491
Proteobacteria	Gammaproteobacteria	Oceanospirillales	Kangiellaceae	Aliikangiella	Aliikangiella_marina	ASV4039
Proteobacteria	Gammaproteobacteria	Oceanospirillales	Kangiellaceae	Aliikangiella		ASV71
Proteobacteria	Gammaproteobacteria	Oceanospirillales	Kangiellaceae	Aliikangiella		ASV2270
Proteobacteria	Gammaproteobacteria	Oceanospirillales	Kangiellaceae	Aliikangiella	uncultured_bacterium	ASV5129
Proteobacteria	Gammaproteobacteria	Oceanospirillales	Kangiellaceae	Aliikangiella		ASV1642
Proteobacteria	Gammaproteobacteria	Oceanospirillales	Nitrincolaceae	Neptuniibacter		ASV4153
Proteobacteria	Gammaproteobacteria	Oceanospirillales	Nitrincolaceae	Neptuniibacter	uncultured_bacterium	ASV3109
Proteobacteria	Gammaproteobacteria	Oceanospirillales	Nitrincolaceae	Neptuniibacter	uncultured_bacterium	ASV864	yes
Proteobacteria	Gammaproteobacteria	Oceanospirillales	Kangiellaceae	Pleionea	Kangiella_sp.	ASV627	yes
Proteobacteria	Gammaproteobacteria	Oceanospirillales	Kangiellaceae	Pleionea	Kangiella_sp.	ASV1552	yes
Proteobacteria	Gammaproteobacteria	Oceanospirillales	Kangiellaceae	Pleionea	Pleionea_sp.	ASV1452	yes
Proteobacteria	Gammaproteobacteria	Oceanospirillales	Kangiellaceae	Pleionea	Kangiella_sp.	ASV3715	yes
Proteobacteria	Gammaproteobacteria	Vibrionales	Vibrionaceae	Vibrio		ASV2969	yes
Proteobacteria	Gammaproteobacteria	Vibrionales	Vibrionaceae	Vibrio		ASV1543	yes
Proteobacteria	Gammaproteobacteria	Vibrionales	Vibrionaceae	Vibrio		ASV1497	yes
Proteobacteria	Gammaproteobacteria	Vibrionales	Vibrionaceae	Vibrio		ASV4060	yes
Proteobacteria	Gammaproteobacteria	Vibrionales	Vibrionaceae	Vibrio		ASV4108	yes
Proteobacteria	Gammaproteobacteria	Vibrionales	Vibrionaceae	Vibrio		ASV3388	yes
Proteobacteria	Gammaproteobacteria	Vibrionales	Vibrionaceae	Vibrio		ASV343	yes
Proteobacteria	Gammaproteobacteria	Vibrionales	Vibrionaceae	Vibrio		ASV4360	yes
Proteobacteria	Gammaproteobacteria	Vibrionales	Vibrionaceae	Vibrio		ASV187	yes
Proteobacteria	Gammaproteobacteria	Vibrionales	Vibrionaceae	Vibrio		ASV4970	yes
Proteobacteria	Gammaproteobacteria	Vibrionales	Vibrionaceae	Vibrio		ASV4933	yes
Proteobacteria	Gammaproteobacteria	Vibrionales	Vibrionaceae	Vibrio		ASV1373	yes
Proteobacteria	Gammaproteobacteria	Vibrionales	Vibrionaceae	Vibrio		ASV2603	yes
Proteobacteria	Gammaproteobacteria	Vibrionales	Vibrionaceae	Vibrio		ASV5085
Verrucomicrobiota	Lentisphaeria	Lentisphaerales	Lentisphaeraceae	Lentisphaera	uncultured_bacterium	ASV4967
Verrucomicrobiota	Lentisphaeria	Lentisphaerales	Lentisphaeraceae	Lentisphaera	uncultured_bacterium	ASV4818
Verrucomicrobiota	Lentisphaeria	Lentisphaerales	Lentisphaeraceae	Lentisphaera	uncultured_bacterium	ASV2003
Verrucomicrobiota	Lentisphaeria	Lentisphaerales	Lentisphaeraceae	Lentisphaera	uncultured_bacterium	ASV2212
Verrucomicrobiota	Lentisphaeria	Lentisphaerales	Lentisphaeraceae	Lentisphaera	uncultured_marine	ASV3518
Verrucomicrobiota	Lentisphaeria	Lentisphaerales	Lentisphaeraceae	Lentisphaera		ASV2415
Verrucomicrobiota	Lentisphaeria	Lentisphaerales	Lentisphaeraceae	Lentisphaera	uncultured_bacterium	ASV5367
Verrucomicrobiota	Lentisphaeria	Lentisphaerales	Lentisphaeraceae	Lentisphaera	uncultured_bacterium	ASV2340
Verrucomicrobiota	Lentisphaeria	Lentisphaerales	Lentisphaeraceae	Lentisphaera	uncultured_bacterium	ASV3648
Verrucomicrobiota	Lentisphaeria	Lentisphaerales	Lentisphaeraceae	Lentisphaera	uncultured_bacterium	ASV1731
Verrucomicrobiota	Lentisphaeria	Lentisphaerales	Lentisphaeraceae	Lentisphaera	uncultured_bacterium	ASV3908
Verrucomicrobiota	Lentisphaeria	Lentisphaerales	Lentisphaeraceae	Lentisphaera	uncultured_bacterium	ASV688
Verrucomicrobiota	Verrucomicrobiae	Opitutales	Puniceicoccaceae	Cerasicoccus	uncultured_Verrucomicrobia	ASV4015
Verrucomicrobiota	Verrucomicrobiae	Opitutales	Puniceicoccaceae	Cerasicoccus	uncultured_deep-sea	ASV2852
Verrucomicrobiota	Verrucomicrobiae	Opitutales	Puniceicoccaceae	Cerasicoccus	uncultured_organism	ASV3681
Verrucomicrobiota	Verrucomicrobiae	Opitutales	Puniceicoccaceae	Cerasicoccus	Cerasicoccus_maritimus	ASV2725
Verrucomicrobiota	Verrucomicrobiae	Opitutales	Puniceicoccaceae	Cerasicoccus	uncultured_Verrucomicrobia	ASV3684
Verrucomicrobiota	Verrucomicrobiae	Opitutales	Puniceicoccaceae	Cerasicoccus	uncultured_bacterium	ASV4905
Verrucomicrobiota	Verrucomicrobiae	Opitutales	Puniceicoccaceae	Cerasicoccus	uncultured_organism	ASV4727
Verrucomicrobiota	Verrucomicrobiae	Opitutales	Puniceicoccaceae	Cerasicoccus		ASV1354
Verrucomicrobiota	Verrucomicrobiae	Opitutales	Puniceicoccaceae	Cerasicoccus	uncultured_organism	ASV356
Verrucomicrobiota	Verrucomicrobiae	Opitutales	Puniceicoccaceae	Cerasicoccus	uncultured_organism	ASV152
Verrucomicrobiota	Verrucomicrobiae	Opitutales	Puniceicoccaceae	Cerasicoccus	uncultured_organism	ASV906
